# Supplementary material for: Recent evolution, domestication and metabolism of cyanide compounds in Lima bean
Source: Research Square preprint supplement (doi:10.21203/rs.3.rs-5727653/v1), 2025-01-07
Supplement: Supplementary file 1 [file 017755f4fbe5bf163d46ae4d.xlsx]

## Sheet: SupplTable1_chrLengths
Chromosome	G27455 (Mesoamerican)	G25900 (Andean)	Difference
Pl01	47615855	42306662	-5309193
Pl02	51638837	57589198	5950361
Pl03	45046558	43754746	-1291812
Pl04	49586013	51962352	2376339
Pl05	38168790	42863093	4694303
Pl06	36661913	37819320	1157407
Pl07	47836809	51941315	4104506
Pl08	57257392	59977548	2720156
Pl09	40893586	47708704	6815118
Pl10	54011697	47730008	-6281689
Pl11	48073160	44933393	-3139767
Total	516790610	528586339	11795729

## Sheet: SupplTable2_TEsSummary
Family	Number	Basepairs
DNA/CACTA	10374	9374094
DNA/DTA	784	316841
DNA/DTC	4114	1855937
DNA/DTH	272	109846
DNA/DTM	3301	1538032
DNA/DTT	226	92724
DNA/Harbinger	336	313572
DNA/Helitron	6503	4144292
DNA/MULE	4025	2461158
DNA/hAT	303	282147
LINE	5897	4502363
LTR/Unknown	1898	1479923
LTR/Copia	3339	4099258
LTR/Copia/ALE-RETROFIT	2788	5136953
LTR/Copia/IVANA-ORYCO	1511	2466090
LTR/Copia/SIRE	7085	20408934
LTR/Copia/TAR-TORK	2048	4596456
LTR/Gypsy	6695	7836946
LTR/Gypsy/ATHILA	2378	5792044
LTR/Gypsy/CRM	7640	23875154
LTR/Gypsy/REINA	386	721618
LTR/Gypsy/TAT	14012	76711378
LTR/Gypsy/TEKAY-DEL	9119	108749275
LTR/TRIM	1372	464564
MITE/DTA	180	53025
MITE/DTC	72	20943
MITE/DTH	32	9592
MITE/DTM	790	389451
MITE/DTT	7	1554
SINE	38	8527
pararetrovirus	58	96197
Total	97583	287908888

## Sheet: SupplTable3_orthogroups
Orthogroup	Total genes	P. acutifolius domesticated (PI 692269)	P. acutifolius wild (PI 638833)	P. lunatus Andean (G25900)	P. lunatus Mesoamerican (G27455)	P. vulgaris (G19833)	Functional annotation
0	18	4	4	3	4	3	Cytochrome P450 71AU50 {ECO:0000303|PubMed:25015725};,
1	5	1	1	1	1	1	Outer envelope protein 61;, KEGG:ath:AT5G21990,
2	20	4	4	4	4	4	Protein RALF-like 33;,Protein RALF-like 1;,Rapid alkalinization factor;, KEGG:ath:AT1G02900,KEGG:ath:AT4G15800,KEGG:nta:107811318,
3	5	1	1	1	1	1	Ethylene-responsive transcription factor ERF034;, KEGG:ath:AT2G44940,
4	2	1	1	0	0	0	None
5	5	1	1	1	1	1	Nuclear transcription factor Y subunit A-3;, KEGG:ath:AT1G72830,
6	10	2	2	2	2	2	B3 domain-containing protein Os04g0581400;,B3 domain-containing transcription factor NGA1;,B3 domain-containing protein Os03g0120900;, KEGG:ath:AT2G46870,KEGG:osa:4331436,
7	10	2	2	2	2	2	Probable glutathione S-transferase;, KEGG:gmx:100527851,
8	5	1	1	1	1	1	Probable L-gulonolactone oxidase 6 {ECO:0000303|PubMed:20622436};, KEGG:ath:AT2G46760,
9	11	2	2	3	2	2	Acyl carrier protein 2, chloroplastic;,Acyl carrier protein 4, chloroplastic;,Acyl carrier protein 1, chloroplastic;,
10	7	3	1	1	1	1	Protein ENHANCED DISEASE RESISTANCE 4 {ECO:0000303|PubMed:25747881};,Extra-large guanine nucleotide-binding protein 2;, KEGG:ath:AT5G05190,
11	19	4	4	4	4	3	Transcription factor BHLH094 {ECO:0000305};,Transcription factor BHLH089 {ECO:0000305};, KEGG:osa:4342637,KEGG:osa:4334471,
12	5	1	1	1	1	1	Caffeoylshikimate esterase;, KEGG:ath:AT1G52760,
13	5	1	1	1	1	1	None
14	5	1	1	1	1	1	Pollen-specific leucine-rich repeat extensin-like protein 3;,Pollen-specific leucine-rich repeat extensin-like protein 1;, KEGG:ath:AT3G19020,KEGG:ath:AT2G15880,
15	7	2	1	0	2	2	Bile salt-activated lipase;,
16	5	1	1	1	1	1	Two-pore potassium channel 1;, KEGG:ath:AT5G55630,
17	8	2	1	1	2	2	Quinone oxidoreductase 1;,Quinone oxidoreductase;, KEGG:pae:PA0023,KEGG:ecj:JW4011,KEGG:eco:b4051,
18	5	1	1	1	1	1	Kinesin-like protein KIN-12E {ECO:0000305};, KEGG:ath:AT3G44050,
19	5	1	1	1	1	1	Uncharacterized protein At4g37920;, KEGG:ath:AT4G37920,
20	5	1	1	1	1	1	Ethylene-responsive transcription factor RAP2-3;, KEGG:ath:AT3G16770,
21	13	5	8	0	0	0	None
22	5	1	1	1	1	1	Caffeoylshikimate esterase;, KEGG:ath:AT1G52760,
23	5	1	1	1	1	1	VQ motif-containing protein 29 {ECO:0000303|PubMed:22535423};, KEGG:ath:AT4G37710,
24	5	1	1	1	1	1	G-type lectin S-receptor-like serine/threonine-protein kinase B120;, KEGG:ath:AT4G21390,
25	5	2	2	0	0	1	Uncharacterized protein L728;, KEGG:vg:9925382,
26	4	2	0	1	1	0	BEACH domain-containing protein C1 {ECO:0000303|PubMed:25618824};, KEGG:ath:AT3G60920,
27	5	1	1	1	1	1	GATA transcription factor 7;, KEGG:ath:AT4G36240,
28	5	1	1	1	1	1	None
29	13	2	2	3	3	3	Putative UPF0481 protein At3g02645;, KEGG:ath:AT3G02645,
30	5	1	1	1	1	1	Protein NPGR2 {ECO:0000303|PubMed:12928497};, KEGG:ath:AT4G28600,
31	5	1	1	1	1	1	PHD finger protein MALE MEIOCYTE DEATH 1 {ECO:0000303|PubMed:12782723};, KEGG:ath:AT1G66170,
32	5	1	1	1	1	1	Receptor-like protein kinase HSL1;, KEGG:ath:AT1G28440,
33	10	4	3	1	1	1	TVP38/TMEM64 family membrane protein slr0305;, KEGG:syn:slr0305,
34	5	1	1	1	1	1	Transcription repressor OFP5;, KEGG:ath:AT4G18830,
35	6	2	2	1	1	0	Polygalacturonase;,
36	5	1	1	1	1	1	Kinesin-like protein KIN-4C {ECO:0000305};, KEGG:ath:AT5G60930,
37	13	1	1	3	7	1	Disease resistance protein RGA2;,Putative disease resistance protein RGA4;,
38	5	1	1	1	1	1	3'-5' exonuclease Snipper {ECO:0000303|PubMed:17135487, ECO:0000312|FlyBase:FBgn0265192};, KEGG:dme:Dmel_CG44248,
39	5	1	1	1	1	1	Ethylene-responsive transcription factor ERF105;,Ethylene-responsive transcription factor 5;, KEGG:nta:107790518,
40	10	2	2	2	2	2	Chlorophyll a-b binding protein CP26, chloroplastic;, KEGG:ath:AT4G10340,
41	5	1	1	1	1	1	None
42	5	1	1	1	1	1	None
43	5	1	1	1	1	1	None
44	6	2	1	1	1	1	DNA-dependent metalloprotease WSS1 homolog 2 {ECO:0000305};, KEGG:spo:SPCC1442.07c,
45	14	5	3	1	3	2	Ankyrin repeat-containing protein BDA1 {ECO:0000305};, KEGG:ath:AT5G54610,
46	5	1	1	1	1	1	Mitochondrial arginine transporter BAC2;, KEGG:ath:AT1G79900,
47	4	1	1	1	1	0	Receptor-interacting serine/threonine-protein kinase 4;,
48	28	10	5	3	5	5	Salicylic acid-binding protein 2 {ECO:0000303|PubMed:14673096};, KEGG:nta:107791137,
49	9	2	2	2	1	2	None
50	5	1	1	1	1	1	Protein TONSOKU {ECO:0000303|PubMed:35298257};,
51	12	3	2	2	3	2	Monocopper oxidase-like protein SKU5;, KEGG:ath:AT4G12420,
52	3	1	1	0	0	1	None
53	5	1	1	1	1	1	Fructose-1,6-bisphosphatase, chloroplastic;, KEGG:bna:106421663,
54	10	2	2	2	2	2	Large ribosomal subunit protein uL1 {ECO:0000305};, KEGG:osa:9266191,
55	5	1	1	1	1	1	tRNA (guanine(9)-N1)-methyltransferase {ECO:0000303|PubMed:24081582};,tRNA methyltransferase 10 homolog A;, KEGG:spo:SPAC6B12.09,
56	10	2	2	2	2	2	Cyclin-dependent kinase D-1;, KEGG:osa:4338689,
57	61	17	11	6	9	18	Chlorophyll a-b binding protein 13, chloroplastic;,Pentatricopeptide repeat-containing protein At3g14730;,Chlorophyll a-b binding protein AB80, chloroplastic;,Chlorophyll a-b binding protein of LHCII type I, chloroplastic;,Chlorophyll a-b binding protein 21, chloroplastic;,Chlorophyll a-b binding protein 215, chloroplastic;,Chlorophyll a-b binding protein 3, chloroplastic;, KEGG:nta:107776229,KEG…
58	5	1	1	1	1	1	Cinnamoyl-CoA reductase-like SNL6 {ECO:0000305};, KEGG:osa:4326581,
59	5	1	1	1	1	1	Proliferating cell nuclear antigen;,
60	5	1	1	1	1	1	NRR repressor homolog 3 {ECO:0000305};, KEGG:osa:4324051,
61	8	2	2	0	2	2	UDP-glycosyltransferase 1 {ECO:0000303|PubMed:24700248};,
62	3	1	1	0	0	1	NADH dehydrogenase [ubiquinone] 1 alpha subcomplex subunit 9, mitochondrial;, KEGG:ath:AT2G20360,
63	4	2	0	0	0	2	None
64	11	3	3	0	3	2	None
65	8	2	1	1	1	3	Protein SHOOT GRAVITROPISM 6;,Calcium-binding protein CML42;, KEGG:ath:AT2G36810,KEGG:ath:AT4G20780,
66	5	1	1	1	1	1	Pentatricopeptide repeat-containing protein At5g66520;, KEGG:ath:AT5G66520,
67	28	6	6	5	5	6	Glyceraldehyde-3-phosphate dehydrogenase GAPC2, cytosolic {ECO:0000303|PubMed:18298409, ECO:0000303|PubMed:22589465};,Glyceraldehyde-3-phosphate dehydrogenase, cytosolic;,Glyceraldehyde-3-phosphate dehydrogenase;,Glyceraldehyde-3-phosphate dehydrogenase GAPCP2, chloroplastic;, KEGG:ath:AT1G13440,KEGG:ath:AT1G16300,
68	8	2	2	1	1	2	Serine/threonine-protein kinase SAPK7;, KEGG:osa:4335877,
69	5	1	1	1	1	1	None
70	9	2	1	2	2	2	Annexin-like protein RJ4;,
71	5	1	1	1	1	1	GDSL esterase/lipase At1g71691;,GDSL esterase/lipase At5g33370;, KEGG:ath:AT5G33370,KEGG:ath:AT1G71691,
72	4	1	1	0	1	1	Transcriptional regulator SUPERMAN;, KEGG:ath:AT3G23130,
73	4	2	1	0	0	1	Transmembrane protein 256 homolog;,
74	5	1	1	1	1	1	MTOR-associated protein MEAK7 {ECO:0000305};, KEGG:dre:561678,
75	5	1	1	1	1	1	E3 ubiquitin-protein ligase SHPRH;, KEGG:mmu:268281,
76	5	1	1	1	1	1	Putative pentatricopeptide repeat-containing protein At3g23330;, KEGG:ath:AT3G23330,
77	8	1	1	2	2	2	None
78	5	1	1	1	1	1	DEAD-box ATP-dependent RNA helicase 24;, KEGG:ath:AT2G47330,
79	61	17	14	4	11	15	Pierisin {ECO:0000303|PubMed:10971585};,Pierisin {ECO:0000303|PubMed:10485873};,Albumin-2 {ECO:0000250|UniProtKB:P08688};,Albumin-2;,
80	3	2	1	0	0	0	None
81	5	1	1	1	1	1	Membralin-like protein At1g60995 {ECO:0000305};, KEGG:ath:AT1G60995,
82	10	2	2	2	2	2	Cell division protein FtsZ homolog 2-1, chloroplastic {ECO:0000303|PubMed:9836740};, KEGG:ath:AT2G36250,
83	5	1	1	1	1	1	DNA (cytosine-5)-methyltransferase CMT1 {ECO:0000305};,Putative DNA (cytosine-5)-methyltransferase CMT1;, KEGG:osa:4332128,
84	5	1	1	1	1	1	Oleoyl-acyl carrier protein thioesterase 1, chloroplastic;, KEGG:ath:AT3G25110,
85	11	3	2	2	2	2	Villin-4 {ECO:0000303|PubMed:10631247};, KEGG:ath:AT4G30160,
86	10	2	2	2	2	2	Septum-promoting GTP-binding protein 1;, KEGG:spo:SPAC1565.06c,
87	16	5	3	0	3	5	Uclacyanin 1 {ECO:0000303|PubMed:9761472};,Blue copper protein {ECO:0000303|PubMed:25971550};,Umecyanin {ECO:0000303|PubMed:5490233};,Stellacyanin;,Mavicyanin;, KEGG:ath:AT2G32300,
88	5	1	1	1	1	1	Filament-like plant protein;,
89	5	1	1	1	1	1	Leucine carboxyl methyltransferase 1 homolog {ECO:0000305};, KEGG:ath:AT1G02100,
90	5	1	1	1	1	1	Chaperone protein dnaJ 8, chloroplastic;, KEGG:ath:AT1G80920,
91	54	14	11	9	9	11	None
92	10	2	2	2	2	2	Topless-related protein 3;, KEGG:ath:AT5G27030,
93	5	1	1	1	1	1	U11/U12 small nuclear ribonucleoprotein 25 kDa protein;, KEGG:ath:AT3G07860,
94	5	1	1	1	1	1	Probable WRKY transcription factor 32;, KEGG:ath:AT4G30935,
95	5	1	1	1	1	1	Protein OPAQUE10 {ECO:0000303|PubMed:27541862};,
96	4	1	1	1	1	0	None
97	14	3	3	3	3	2	Tetrahydroberberine oxidase {ECO:0000303|PubMed:3402447};,Berberine bridge enzyme-like 22 {ECO:0000303|PubMed:26037923};,Berberine bridge enzyme-like 23 {ECO:0000303|PubMed:26037923};, KEGG:ath:AT4G20860,KEGG:ag:ADY15026,
98	5	1	1	1	1	1	Protein STRUBBELIG-RECEPTOR FAMILY 2;, KEGG:ath:AT5G06820,
99	14	3	3	3	2	3	Cell division cycle 20.1, cofactor of APC complex;, KEGG:ath:AT4G33270,
100	10	2	2	2	2	2	NADP-dependent glyceraldehyde-3-phosphate dehydrogenase;,
101	5	1	1	1	1	1	Transcription factor GAMYB;,Transcription factor MYB33 {ECO:0000303|PubMed:11597504};, KEGG:osa:4327362,KEGG:ath:AT5G06100,
102	14	3	3	2	3	3	Snakin-1;,
103	2	1	1	0	0	0	None
104	5	1	1	1	1	1	Histone-lysine N-methyltransferase ASHR2;, KEGG:ath:AT2G19640,
105	5	1	1	1	1	1	Peptidyl-prolyl cis-trans isomerase E;, KEGG:mmu:56031,
106	153	29	30	7	44	43	Disease resistance protein RUN1 {ECO:0000305};,Disease resistance protein Roq1 {ECO:0000305};,TMV resistance protein N;,Disease resistance protein RLM3 {ECO:0000305};,Disease resistance protein RPV1 {ECO:0000305};, KEGG:ath:AT4G16990,
107	12	2	2	3	3	2	Probable protein phosphatase 2C 55;,Probable protein phosphatase 2C 80;, KEGG:ath:AT5G66720,KEGG:ath:AT4G16580,
108	5	1	1	1	1	1	None
109	2	2	0	0	0	0	None
110	5	1	1	1	1	1	Beta-amylase 1, chloroplastic;, KEGG:ath:AT3G23920,
111	14	5	3	2	2	2	IST1-like protein;, KEGG:ddi:DDB_G0289029,
112	4	1	0	1	1	1	NF-X1-type zinc finger protein NFXL2;, KEGG:ath:AT5G05660,
113	14	3	3	2	3	3	Acetolactate synthase 1, chloroplastic;,Acetolactate synthase, chloroplastic;,Acetolactate synthase 2, chloroplastic;,Acetolactate synthase 3, chloroplastic;, KEGG:bna:106353716,KEGG:bna:106353715,KEGG:ath:AT3G48560,
114	5	1	1	1	1	1	1-aminocyclopropane-1-carboxylate oxidase homolog 12;, KEGG:ath:AT5G59540,
115	10	2	2	2	2	2	Anaerobic nitrite reductase Hb2 {ECO:0000305};,Anaerobic nitrite reductase Hb1 {ECO:0000305};,
116	13	3	2	3	3	2	Cytosolic purine 5'-nucleotidase {ECO:0000250|UniProtKB:P49902};, KEGG:ddi:DDB_G0279053,
117	5	1	1	1	1	1	Auxin-responsive protein SAUR76 {ECO:0000305};, KEGG:ath:AT5G20820,
118	5	1	1	1	1	1	CASP-like protein 5C1;, KEGG:osa:4334238,
119	5	1	1	1	1	1	None
120	5	1	1	1	1	1	Uncharacterized membrane protein At4g09580;, KEGG:ath:AT4G09580,
121	14	3	3	2	3	3	Ammonium transporter 2;,Ammonium transporter 3 member 1;, KEGG:ath:AT2G38290,KEGG:osa:4324937,
122	5	1	1	0	2	1	Cysteine-rich receptor-like protein kinase 29;, KEGG:ath:AT4G21410,
123	5	1	1	1	1	1	Phototropin-2 {ECO:0000303|PubMed:12383086, ECO:0000303|PubMed:12821778};, KEGG:ath:AT5G58140,
124	12	3	2	2	2	3	None
125	4	1	1	1	1	0	Dirigent protein 3;, KEGG:ath:AT5G49040,
126	5	1	1	1	1	1	None
127	4	1	1	0	1	1	LRR receptor-like serine/threonine-protein kinase HSL2;, KEGG:ath:AT5G65710,
128	5	1	1	1	1	1	Protein FANTASTIC FOUR 2;, KEGG:ath:AT1G03170,
129	5	1	1	1	1	1	ACT domain-containing protein ACR9 {ECO:0000305};, KEGG:ath:AT2G39570,
130	10	2	2	2	2	2	None
131	13	3	3	4	3	0	Protein ALP1-like {ECO:0000305};, KEGG:ath:AT3G55350,
132	10	2	2	2	2	2	Probable serine/threonine-protein kinase PBL23 {ECO:0000305};, KEGG:ath:AT3G20530,
133	17	6	5	1	1	4	7-deoxyloganetic acid glucosyltransferase;,7-deoxyloganetic acid glucosyl transferase {ECO:0000303|PubMed:24104568, ECO:0000303|PubMed:24710322};, KEGG:ag:BAO01109,
134	5	1	1	1	1	1	Probable WRKY transcription factor 2 {ECO:0000303|Ref.1};, KEGG:ath:AT5G56270,
135	5	1	1	1	1	1	Probable E3 ubiquitin-protein ligase RHY1A {ECO:0000305};, KEGG:ath:AT1G49850,
136	9	2	2	1	2	2	Protein NRT1/ PTR FAMILY 5.2;, KEGG:ath:AT5G46050,
137	59	3	4	32	14	6	Elongation factor 1-beta 1;,Elongation factor 1-delta;,Elongation factor 1-delta 2;, KEGG:ath:AT5G12110,
138	5	1	1	1	1	1	UBP1-associated protein 2C;, KEGG:ath:AT3G15010,
139	5	1	1	1	1	1	Flavonol synthase/flavanone 3-hydroxylase;,
140	11	2	2	2	3	2	Folate synthesis bifunctional protein, mitochondrial {ECO:0000303|PubMed:9118956};,
141	5	1	1	1	1	1	Probable inactive shikimate kinase like 1, chloroplastic;, KEGG:ath:AT3G26900,
142	5	1	1	1	1	1	Pentatricopeptide repeat-containing protein At1g76280;, KEGG:ath:AT1G76280,
143	5	1	1	1	1	1	F-box and leucine-rich repeat protein 13 {ECO:0000303|PubMed:29348145};,F-box and leucine-rich repeat protein 13;, KEGG:hsa:222235,KEGG:mmu:320118,
144	150	34	18	6	32	60	Putative disease resistance protein At3g14460;,Disease resistance protein RGA2;,Protein RST1 {ECO:0000305};,Putative disease resistance RPP13-like protein 1;,Putative disease resistance protein RGA3;,Probable phospholipid-transporting ATPase 8 {ECO:0000303|PubMed:11402198};, KEGG:ath:AT3G14460,KEGG:ath:AT3G14470,KEGG:ath:AT3G27870,
145	29	8	7	3	6	5	Pentatricopeptide repeat-containing protein At1g62910;,Pentatricopeptide repeat-containing protein At1g12620;,Pentatricopeptide repeat-containing protein At1g12775, mitochondrial;,Putative pentatricopeptide repeat-containing protein At1g12700, mitochondrial;,Pentatricopeptide repeat-containing protein At1g62680, mitochondrial;,Pentatricopeptide repeat-containing protein At3g22470, mitochondrial;,…
146	10	2	2	2	2	2	DNA-3-methyladenine glycosylase 1;, KEGG:ecj:JW3518,KEGG:eco:b3549,
147	5	1	1	1	1	1	DDB1- and CUL4-associated factor 13;, KEGG:gga:420263,
148	16	3	3	3	3	4	Glutathione S-transferase U22;,Probable glutathione S-transferase;,Probable glutathione S-transferase parC;, KEGG:nta:107823949,KEGG:ath:AT1G78340,KEGG:nta:107782951,
149	5	1	1	1	1	1	VQ motif-containing protein 17 {ECO:0000303|PubMed:22535423};, KEGG:ath:AT2G42140,
150	22	4	5	1	1	11	F-box protein CPR1;, KEGG:ath:AT4G12560,
151	5	1	1	1	1	1	Zinc finger protein ZAT12;,Zinc finger protein ZAT18 {ECO:0000303|PubMed:28586434};, KEGG:ath:AT5G59820,
152	5	1	1	1	1	1	Geranylgeranyl transferase type-2 subunit beta 1 {ECO:0000305};, KEGG:ath:AT5G12210,
153	5	1	1	1	1	1	Dynein light chain 1, cytoplasmic;,Probable dynein light chain;, KEGG:smm:Smp_201060,KEGG:rno:58945,
154	10	2	2	2	2	2	Protein GRAVITROPIC IN THE LIGHT 1 {ECO:0000303|PubMed:16640600};, KEGG:ath:AT5G58960,
155	5	1	1	1	1	1	Phosphomannomutase/phosphoglucomutase;, KEGG:pst:PSPTO_0083,
156	5	1	1	1	1	1	Kinesin-like protein KIN-UA {ECO:0000305};, KEGG:ath:AT1G12430,
157	5	1	1	1	1	1	ATP-dependent DNA helicase DDM1;, KEGG:ath:AT5G66750,
158	20	4	4	4	4	4	Probable UDP-arabinopyranose mutase 1 {ECO:0000305};,Probable UDP-arabinopyranose mutase 2 {ECO:0000305};,UDP-arabinopyranose mutase 1 {ECO:0000303|PubMed:17182701};,UDP-arabinopyranose mutase 3 {ECO:0000303|PubMed:17182701};, KEGG:osa:4343849,KEGG:osa:4333393,
159	13	3	3	2	3	2	Amino acid transporter AVT1A {ECO:0000305};, KEGG:ath:AT2G41190,
160	10	2	2	2	2	2	Ethylene-responsive transcription factor SHINE 3;,Ethylene-responsive transcription factor SHINE 2;,Ethylene-responsive transcription factor WIN1 {ECO:0000303|PubMed:30061735};, KEGG:ath:AT5G25390,KEGG:zma:100282301,
161	6	1	1	1	1	2	Trigger factor {ECO:0000255|HAMAP-Rule:MF_00303};, KEGG:syp:SYNPCC7002_A1276,
162	4	1	0	1	1	1	None
163	10	3	3	1	1	2	U-box domain-containing protein 33;, KEGG:ath:AT2G45910,
164	5	1	1	1	1	1	U-box domain-containing protein 4;, KEGG:ath:AT2G23140,
165	5	1	1	1	1	1	5-formyltetrahydrofolate cyclo-ligase, mitochondrial;, KEGG:ath:AT5G13050,
166	5	1	1	1	1	1	Protein TRIGALACTOSYLDIACYLGLYCEROL 4, chloroplastic {ECO:0000303|PubMed:18689504};, KEGG:ath:AT3G06960,
167	4	1	1	0	1	1	None
168	10	2	2	2	2	2	Interferon-related developmental regulator 1;, KEGG:ssc:493185,
169	5	1	1	1	1	1	None
170	8	2	2	1	1	2	PRA1 family protein B4;, KEGG:ath:AT2G38360,
171	5	1	1	1	1	1	WAT1-related protein At2g37460;, KEGG:ath:AT2G37460,
172	5	1	1	1	1	1	Palmitoyl-acyl carrier protein thioesterase, chloroplastic;,
173	10	2	2	2	2	2	Probable peroxygenase 4;,Probable peroxygenase 5;, KEGG:ath:AT1G70670,KEGG:ath:AT1G70680,
174	25	5	5	5	5	5	Probable serine/threonine-protein kinase At1g09600;,Probable serine/threonine-protein kinase At1g54610;, KEGG:ath:AT1G54610,KEGG:ath:AT1G09600,
175	7	2	2	1	1	1	Kaempferol 3-O-beta-D-galactosyltransferase;, KEGG:ag:AAD55985,
176	10	2	2	2	2	2	Importin subunit beta-1 {ECO:0000305};, KEGG:ath:AT5G53480,
177	5	1	1	1	1	1	Non-specific lipid transfer protein GPI-anchored 8 {ECO:0000303|PubMed:23893219};,Non-specific lipid transfer protein GPI-anchored 7 {ECO:0000303|PubMed:23893219};, KEGG:ath:AT1G62790,
178	7	2	1	1	2	1	Glutamate receptor 3.1;,Glutamate receptor 2.5;,Glutamate receptor 2.9;, KEGG:ath:AT5G11210,KEGG:ath:AT2G29100,
179	42	11	7	3	9	12	Linoleate 9S-lipoxygenase 1;,Seed linoleate 9S-lipoxygenase;,Linoleate 9S-lipoxygenase;, KEGG:gmx:547835,
180	7	3	1	1	1	1	Endoplasmic reticulum metallopeptidase 1 {ECO:0000250|UniProtKB:Q6UPR8, ECO:0000312|HGNC:HGNC:23703};,Endoplasmic reticulum metallopeptidase 1 {ECO:0000250|UniProtKB:Q6UPR8};, KEGG:mmu:226090,
181	10	2	2	2	2	2	Sulfoquinovosyl transferase SQD2 {ECO:0000303|PubMed:11960029};, KEGG:ath:AT5G01220,
182	9	3	3	1	1	1	Flavonoid 3'-monooxygenase;, KEGG:ag:AAD56282,KEGG:ath:AT5G07990,
183	15	3	3	3	3	3	Serine/threonine protein phosphatase 2A 59 kDa regulatory subunit B' gamma isoform;,Serine/threonine protein phosphatase 2A 59 kDa regulatory subunit B' eta isoform;, KEGG:ath:AT3G26020,KEGG:ath:AT4G15415,
184	30	7	4	5	4	10	Probable LRR receptor-like serine/threonine-protein kinase At3g47570;,Putative receptor-like protein kinase At3g47110;,LRR receptor-like serine/threonine-protein kinase EFR {ECO:0000303|PubMed:16713565};, KEGG:ath:AT5G20480,KEGG:ath:AT3G47570,
185	5	1	1	1	1	1	Transcription factor bHLH87;, KEGG:ath:AT3G21330,
186	5	1	1	1	1	1	None
187	10	2	2	2	2	2	NDR1/HIN1-like protein 10 {ECO:0000303|PubMed:14666423};,NDR1/HIN1-like protein 3 {ECO:0000303|Ref.1};, KEGG:ath:AT5G06320,KEGG:ath:AT2G35980,
188	5	1	1	1	1	1	Membrane-anchored ubiquitin-fold protein 3;,Membrane-anchored ubiquitin-fold protein 4;, KEGG:ath:AT3G26980,KEGG:ath:AT4G24990,
189	18	3	3	5	4	3	Putative F-box protein At1g23770;,F-box protein SKIP22;, KEGG:ath:AT1G23780,KEGG:ath:AT1G23770,
190	2	1	1	0	0	0	None
191	8	1	1	2	3	1	Putative esterase YitV;,Putative hydrolase YtaP;, KEGG:bsu:BSU30250,
192	10	2	2	2	2	2	Transcription factor bHLH155;,Transcription factor EMB1444 {ECO:0000303|PubMed:12586866};, KEGG:ath:AT1G06150,
193	5	1	1	1	1	1	Probable pectinesterase 15;, KEGG:ath:AT2G36710,
194	10	2	2	2	2	2	Heat stress transcription factor B-4;, KEGG:ath:AT1G46264,
195	38	7	5	5	6	15	LOB domain-containing protein 25;,Protein RST1 {ECO:0000305};,Pentatricopeptide repeat-containing protein At5g40400;,Protein LATERAL ORGAN BOUNDARIES;, KEGG:ath:AT5G40400,KEGG:ath:AT3G27670,KEGG:ath:AT3G27650,KEGG:ath:AT5G63090,
196	5	1	1	1	1	1	Protein CLP1 homolog {ECO:0000255|HAMAP-Rule:MF_03035};, KEGG:ath:AT3G04680,
197	5	1	1	1	1	1	NifU-like protein 3, chloroplastic;, KEGG:ath:AT4G25910,
198	25	5	5	5	5	5	Vesicle-associated protein 4-2;,Vesicle-associated protein 4-1;, KEGG:ath:AT4G21450,KEGG:ath:AT5G54110,
199	21	4	4	4	5	4	LOB domain-containing protein 4;, KEGG:ath:AT1G31320,
200	5	1	1	1	1	1	Phytochrome A-associated F-box protein;, KEGG:ath:AT4G02440,
201	5	1	1	1	1	1	Cytochrome P450 71D8;, KEGG:gmx:100780605,
202	10	2	2	2	2	2	None
203	12	4	2	2	2	2	Protein fluG;, KEGG:ani:ANIA_04819,
204	20	4	4	3	5	4	Cysteine-rich receptor-like protein kinase 2;, KEGG:ath:AT1G70520,
205	10	2	2	2	2	2	Xyloglucan galactosyltransferase MUR3 {ECO:0000305};, KEGG:ath:AT2G20370,
206	5	1	1	1	1	1	RAF-like serine/threonine-protein kinase 20 {ECO:0000303|PubMed:38128538};, KEGG:ath:AT1G79570,
207	4	3	1	0	0	0	None
208	5	1	1	1	1	1	Squamosa promoter-binding-like protein 7;, KEGG:osa:4336597,
209	5	1	1	1	1	1	Probable WRKY transcription factor 3;,Probable WRKY transcription factor 4;, KEGG:ath:AT2G03340,KEGG:ath:AT1G13960,
210	5	1	1	1	1	1	Ribosomal RNA small subunit methyltransferase I {ECO:0000255|HAMAP-Rule:MF_01877};, KEGG:syn:sll0818,
211	11	2	3	2	2	2	Cytochrome P450 82A4;,Cytochrome P450 82A3;,Cytochrome P450 82C3;,Flavonoid-6-hydroxylase {ECO:0000303|PubMed:23184958};,Demethylepipodophyllotoxin synthase {ECO:0000303|PubMed:26359402};, KEGG:ath:AT4G31950,KEGG:gmx:100778056,KEGG:ag:ALG05144,
212	5	1	1	1	1	1	Protein Abitram {ECO:0000305};, KEGG:xtr:448390,
213	29	6	6	4	7	6	Ras-related protein Rab11D;,Ras-related protein RABA1b;,Ras-related protein RABA1f;, KEGG:ath:AT5G60860,KEGG:ath:AT1G16920,
214	5	1	1	1	1	1	Exocyst complex component EXO84A;, KEGG:ath:AT1G10385,
215	13	3	2	2	3	3	Tetrahydroberberine oxidase {ECO:0000303|PubMed:3402447};,Pentatricopeptide repeat-containing protein At2g03880, mitochondrial;,Berberine bridge enzyme-like 8 {ECO:0000303|PubMed:26037923};, KEGG:ag:ADY15026,KEGG:ath:AT2G03880,KEGG:ath:AT1G30700,
216	8	2	1	2	2	1	MLO-like protein 11;,MLO-like protein 4;, KEGG:ath:AT5G53760,KEGG:ath:AT1G11000,
217	20	9	6	1	2	2	DNA-directed RNA polymerase subunit beta {ECO:0000255|HAMAP-Rule:MF_01321};, KEGG:pvu:PhvuCp22,
218	15	3	3	3	3	3	Fasciclin-like arabinogalactan protein 17;,Fasciclin-like arabinogalactan protein 16;, KEGG:ath:AT5G06390,KEGG:ath:AT2G35860,
219	5	1	1	1	1	1	Pentatricopeptide repeat-containing protein At3g06920;, KEGG:ath:AT3G06920,
220	5	1	1	1	1	1	V-type proton ATPase subunit F;, KEGG:ath:AT4G02620,
221	5	1	1	1	1	1	None
222	10	2	2	2	2	2	NAC domain-containing protein 75 {ECO:0000303|PubMed:15029955};, KEGG:ath:AT4G29230,
223	10	2	2	2	2	2	Probable serine/threonine-protein kinase PBL3 {ECO:0000305};, KEGG:ath:AT2G02800,
224	5	1	1	1	1	1	Heterogeneous nuclear ribonucleoprotein Q {ECO:0000305};, KEGG:ath:AT4G00830,
225	32	6	5	7	7	7	1-aminocyclopropane-1-carboxylate oxidase 4;,1-aminocyclopropane-1-carboxylate oxidase;, KEGG:sly:544285,KEGG:pmum:103329345,
226	9	2	1	2	2	2	Heat shock 22 kDa protein, mitochondrial;,
227	2	2	0	0	0	0	None
228	5	1	1	1	1	1	Uncharacterized protein At1g51745;,
229	34	7	6	7	7	7	Tubulin alpha-5 chain;,Tubulin alpha-1 chain;,Tubulin alpha-2 chain;,Tubulin alpha chain;,Tubulin alpha-3 chain;,Tubulin alpha-4 chain;,Tubulin alpha-6 chain;, KEGG:osa:4343694,KEGG:zma:542582,KEGG:ath:AT5G19770,KEGG:ath:AT5G19780,KEGG:ghi:107898755,
230	14	2	3	3	3	3	AP2-like ethylene-responsive transcription factor At1g16060;, KEGG:ath:AT1G16060,
231	4	1	1	0	1	1	Transcription factor MYB118 {ECO:0000303|PubMed:11597504};, KEGG:ath:AT3G27785,
232	5	1	1	1	1	1	Outer envelope protein 64, mitochondrial;, KEGG:ath:AT5G09420,
233	5	1	1	1	1	1	Glutamate receptor 3.4 {ECO:0000303|PubMed:11379626};, KEGG:ath:AT1G05200,
234	9	2	2	1	2	2	Endochitinase EP3 {ECO:0000303|PubMed:11525512};,Endochitinase PR4;, KEGG:ath:AT3G54420,
235	15	3	3	3	3	3	Molybdate transporter 1;, KEGG:ath:AT2G25680,
236	19	6	3	0	5	5	None
237	14	3	3	3	2	3	Ribulose bisphosphate carboxylase small subunit, chloroplastic 1 {ECO:0000255|HAMAP-Rule:MF_00860};,
238	5	1	1	1	1	1	Polygalacturonase At1g48100;, KEGG:ath:AT1G48100,
239	90	18	18	11	17	26	Fasciclin-like arabinogalactan protein 12;,Fasciclin-like arabinogalactan protein 11;,Ankyrin repeat-containing protein At5g02620;, KEGG:ath:AT5G03170,KEGG:ath:AT5G60490,KEGG:ath:AT5G02620,
240	5	1	1	1	1	1	RNA demethylase ALKBH9B {ECO:0000305};, KEGG:ath:AT2G17970,
241	4	2	1	0	0	1	DDT domain-containing protein PTM {ECO:0000305};, KEGG:ath:AT5G35210,
242	5	1	1	1	1	1	Probable protein phosphatase 2C 24;,Protein phosphatase 2C 3 {ECO:0000303|PubMed:19021904};, KEGG:ath:AT2G29380,
243	8	2	2	1	1	2	2-oxoglutarate-dependent dioxygenase DAO;, KEGG:osa:4336150,
244	5	1	1	1	1	1	Nonsense-mediated mRNA decay factor SMG9 {ECO:0000312|RGD:1309888};,Nonsense-mediated mRNA decay factor SMG9 {ECO:0000250|UniProtKB:Q9H0W8};, KEGG:sasa:100194832,KEGG:rno:365215,
245	10	2	2	2	2	2	LOB domain-containing protein 36;, KEGG:ath:AT5G66870,
246	5	1	1	1	1	1	Vicilin-like seed storage protein At2g28490;, KEGG:ath:AT2G28490,
247	28	4	2	10	10	2	Callose synthase 7;,Putative callose synthase 6;, KEGG:ath:AT3G59100,KEGG:ath:AT1G06490,
248	5	1	1	1	1	1	Probable U3 small nucleolar RNA-associated protein 7;, KEGG:spo:SPAC959.03c,
249	5	1	1	1	1	1	None
250	12	4	2	2	2	2	Protein REDUCED CHLOROPLAST COVERAGE 1 {ECO:0000303|PubMed:26862170};, KEGG:ath:AT1G01320,
251	10	2	2	2	2	2	E3 ubiquitin-protein ligase UPL3;, KEGG:ath:AT4G38600,
252	21	4	3	5	4	5	Wall-associated receptor kinase-like 4;,Wall-associated receptor kinase-like 2;,Wall-associated receptor kinase-like 22;,Wall-associated receptor kinase-like 8;, KEGG:ath:AT1G16260,KEGG:ath:AT1G16150,KEGG:ath:AT1G16130,KEGG:ath:AT1G79670,
253	7	2	2	1	1	1	Magnesium dechelatase SGRL, chloroplastic {ECO:0000305};, KEGG:ath:AT1G44000,
254	7	1	1	2	3	0	Probable transcription factor MYB58 {ECO:0000305};, KEGG:osa:4336583,
255	10	2	2	2	2	2	Nuclear pore complex protein NUP98A {ECO:0000303|PubMed:21189294};, KEGG:ath:AT1G10390,
256	6	2	1	1	1	1	CCR4-NOT transcription complex subunit 1;, KEGG:hsa:23019,KEGG:mmu:234594,
257	6	1	2	1	1	1	Ribosomal RNA small subunit methyltransferase G {ECO:0000255|HAMAP-Rule:MF_00074};, KEGG:lhe:lhv_1867,KEGG:sth:STH3334,
258	10	2	2	2	2	2	Calcium/calmodulin-regulated receptor-like kinase 1 {ECO:0000303|PubMed:21056039};, KEGG:ath:AT5G54590,
259	5	1	1	1	1	1	Proline-rich receptor-like protein kinase PERK1;, KEGG:ath:AT3G24550,
260	5	1	1	1	1	1	Cellulose synthase-like protein B4;,Cellulose synthase-like protein H1;, KEGG:osa:4348359,
261	5	1	1	1	1	1	Transcription factor FAMA;, KEGG:ath:AT3G24140,
262	15	3	3	3	3	3	Transcription factor ICE1;, KEGG:ath:AT3G26744,
263	5	1	1	1	1	1	Protein C2-DOMAIN ABA-RELATED 1 {ECO:0000303|PubMed:25465408};,Protein C2-DOMAIN ABA-RELATED 4 {ECO:0000303|PubMed:25465408};, KEGG:ath:AT3G17980,KEGG:ath:AT5G37740,
264	8	1	1	1	3	2	Flt3 receptor-interacting lectin {ECO:0000303|PubMed:9892687};,
265	6	2	1	1	1	1	Phosphatase IMPL1, chloroplastic;, KEGG:ath:AT1G31190,
266	10	2	2	2	2	2	NAC domain-containing protein 100 {ECO:0000303|PubMed:15029955};, KEGG:ath:AT5G61430,
267	10	2	2	2	2	2	RING-H2 finger protein ATL47;,RING-H2 finger protein ATL46;, KEGG:ath:AT1G23980,KEGG:ath:AT5G40250,
268	2	2	0	0	0	0	None
269	10	2	2	2	2	2	None
270	2	1	1	0	0	0	None
271	4	1	1	1	0	1	None
272	14	3	2	3	3	3	Myosin-17;,Myosin-11;, KEGG:ath:AT5G20490,KEGG:ath:AT1G54560,
273	7	2	1	1	1	2	Puromycin-sensitive aminopeptidase;, KEGG:ath:AT1G63770,
274	15	3	3	3	3	3	NADPH--cytochrome P450 reductase 2 {ECO:0000255|HAMAP-Rule:MF_03212};,NADPH--cytochrome P450 reductase {ECO:0000255|HAMAP-Rule:MF_03212};,NADPH--cytochrome P450 reductase 1 {ECO:0000255|HAMAP-Rule:MF_03212, ECO:0000303|PubMed:30851440};, KEGG:ath:AT4G30210,KEGG:vra:106762177,
275	5	1	1	1	1	1	Bidirectional sugar transporter SWEET17 {ECO:0000303|PubMed:21107422};, KEGG:ath:AT4G15920,
276	10	2	2	2	2	2	Protein EARLY RESPONSIVE TO DEHYDRATION 15 {ECO:0000303|PubMed:21482825};,
277	5	1	1	1	1	1	Putative pentatricopeptide repeat-containing protein At3g01580;, KEGG:ath:AT3G01580,
278	15	3	2	3	3	4	SKP1-like protein 21;, KEGG:ath:AT3G61415,
279	20	4	4	4	4	4	Ubiquitin-conjugating enzyme E2 variant 1D;,Ubiquitin-conjugating enzyme E2 variant 1C;,Ubiquitin-conjugating enzyme E2 variant 1A;, KEGG:ath:AT2G36060,KEGG:ath:AT3G52560,KEGG:ath:AT1G23260,
280	5	1	1	1	1	1	UDP-glycosyltransferase 90A1;, KEGG:ath:AT2G16890,
281	5	1	1	1	1	1	Probable protein phosphatase 2C 8;, KEGG:osa:4324182,
282	7	2	2	1	1	1	None
283	9	2	1	2	2	2	Chaperone protein dnaJ 20, chloroplastic;, KEGG:ath:AT4G13830,
284	5	1	1	1	1	1	Chromo domain protein LHP1;,
285	4	1	0	1	1	1	B2 protein;,
286	7	1	1	2	2	1	Probable ubiquitin conjugation factor E4;, KEGG:ath:AT5G15400,
287	10	2	2	2	2	2	Altered inheritance of mitochondria protein 32;, KEGG:pgu:PGUG_03650,KEGG:dha:DEHA2E10956g,
288	5	1	1	1	1	1	None
289	10	2	2	2	2	2	Beta-glucuronosyltransferase GlcAT14A {ECO:0000305};,Beta-glucuronosyltransferase GlcAT14B {ECO:0000305};, KEGG:ath:AT5G39990,
290	9	1	2	2	2	2	Protein GET1 {ECO:0000303|PubMed:28096354};,Heterogeneous nuclear ribonucleoprotein F;, KEGG:ath:AT4G16444,KEGG:hsa:3185,
291	10	2	2	2	2	2	O-fucosyltransferase 7 {ECO:0000305};, KEGG:ath:AT1G22460,
292	5	1	1	1	1	1	Probable LRR receptor-like serine/threonine-protein kinase IRK {ECO:0000305};, KEGG:ath:AT3G56370,
293	5	1	1	1	1	1	SEED MATURATION PROTEIN 1 {ECO:0000303|PubMed:20870712};, KEGG:ath:AT3G12960,
294	5	1	1	1	1	1	Mechanosensitive ion channel protein 10;, KEGG:ath:AT5G12080,
295	4	1	1	0	1	1	Agamous-like MADS-box protein AGL80;, KEGG:ath:AT5G48670,
296	5	1	1	1	1	1	Histone H1.2;,Histone H1;, KEGG:ath:AT2G30620,
297	5	1	1	1	1	1	COP9 signalosome complex subunit 5b;,COP9 signalosome complex subunit 5 {ECO:0000303|PubMed:27137867};, KEGG:osa:4337249,
298	5	1	1	1	1	1	ABC transporter F family member 4;, KEGG:ath:AT3G54540,
299	15	3	3	3	3	3	Allene oxide cyclase, chloroplastic {ECO:0000303|Ref.1, ECO:0000303|Ref.2};, KEGG:osa:4333201,
300	5	1	1	1	1	1	Peroxisomal nicotinamide adenine dinucleotide carrier;, KEGG:ath:AT2G39970,
301	10	2	2	2	2	2	Reticulocyte-binding protein homolog 2a {ECO:0000303|PubMed:11160005};, KEGG:pfa:PF3D7_1335400,
302	10	2	2	2	2	2	ATP sulfurylase 2;,ATP sulfurylase 1, chloroplastic;, KEGG:ath:AT3G22890,KEGG:ath:AT1G19920,
303	5	1	1	1	1	1	None
304	4	1	1	0	1	1	Probable polygalacturonase At3g15720;, KEGG:ath:AT3G15720,
305	47	14	9	5	10	9	Rust resistance kinase Lr10 {ECO:0000312|EMBL:AAC49629.1};,PR5-like receptor kinase {ECO:0000303|PubMed:8637920};,LEAF RUST 10 DISEASE-RESISTANCE LOCUS RECEPTOR-LIKE PROTEIN KINASE-like 1.2 {ECO:0000303|PubMed:12805585};,LEAF RUST 10 DISEASE-RESISTANCE LOCUS RECEPTOR-LIKE PROTEIN KINASE-like 2.5 {ECO:0000303|PubMed:12805585};, KEGG:ath:AT5G38280,KEGG:ath:AT1G18390,KEGG:ath:AT1G66910,
306	5	1	1	1	1	1	Kinesin-like protein KIN-12B {ECO:0000305};,Kinesin-like protein KIN-12A {ECO:0000305};, KEGG:ath:AT3G23670,
307	10	2	2	2	2	2	Protein kinase PVPK-1;,
308	24	5	4	3	5	7	Protein ZINC INDUCED FACILITATOR-LIKE 1;, KEGG:ath:AT5G13750,
309	5	1	1	1	1	1	Selenoprotein F {ECO:0000250|UniProtKB:O60613};, KEGG:bta:614360,
310	5	1	1	1	1	1	F-box protein PP2-B15;, KEGG:ath:AT1G09155,
311	5	1	1	1	1	1	Protein SHI RELATED SEQUENCE 3;, KEGG:ath:AT2G21400,
312	10	2	2	2	2	2	IRK-interacting protein {ECO:0000303|PubMed:15618632};, KEGG:ath:AT5G12900,
313	5	1	1	1	1	1	Glucan endo-1,3-beta-glucosidase 1;,Glucan endo-1,3-beta-glucosidase 13;, KEGG:ath:AT5G56590,
314	3	1	0	1	0	1	NDR1/HIN1-like protein 3 {ECO:0000303|Ref.1};, KEGG:ath:AT5G06320,
315	9	2	2	2	1	2	Transmembrane protein 208;, KEGG:dre:404632,
316	27	6	5	3	4	9	Cinnamoyl-CoA reductase CAD2 {ECO:0000305|PubMed:25217505};,Phenylacetaldehyde reductase {ECO:0000303|PubMed:20650544};, KEGG:mtr:11427940,
317	39	8	8	7	8	8	Zinc finger protein WIP6;,Zinc finger protein WIP2;,Zinc finger protein WIP5;, KEGG:ath:AT3G57670,KEGG:ath:AT1G51220,KEGG:ath:AT1G13290,
318	10	2	2	2	2	2	Mannan endo-1,4-beta-mannosidase 7;, KEGG:ath:AT5G66460,
319	5	1	1	1	1	1	Pollen receptor-like kinase 3 {ECO:0000303|PubMed:12139002};, KEGG:ath:AT3G42880,
320	10	2	2	2	2	2	Elongation factor 1-gamma;,Elongation factor 1-gamma 2;, KEGG:osa:4328752,
321	10	2	2	2	2	2	DNA-directed RNA polymerase 2, chloroplastic/mitochondrial;,DNA-directed RNA polymerase 2B, chloroplastic/mitochondrial;,DNA-directed RNA polymerase 1B, mitochondrial;, KEGG:nta:107765810,KEGG:nta:107784816,
322	10	2	2	2	2	2	GEM-like protein 4;,Putative GEM-like protein 8;, KEGG:ath:AT5G23370,KEGG:ath:AT5G08350,
323	5	1	1	1	1	1	None
324	4	1	1	0	1	1	Nudix hydrolase 2 {ECO:0000303|PubMed:15878881};, KEGG:ath:AT5G47650,
325	5	1	1	1	1	1	WD repeat-containing protein 44;, KEGG:bta:286825,
326	5	1	1	1	1	1	None
327	5	1	1	1	1	1	CDK5RAP1-like protein;, KEGG:ath:AT4G36390,
328	5	1	1	1	1	1	Probable aspartyl protease At4g16563 {ECO:0000305};,Aspartic proteinase nepenthesin-1;, KEGG:ath:AT4G16563,
329	25	5	5	5	5	5	Axial regulator YABBY 5;,Axial regulator YABBY 1;,Putative axial regulator YABBY 2;, KEGG:ath:AT2G45190,KEGG:ath:AT1G08465,KEGG:ath:AT2G26580,
330	20	5	2	1	6	6	Cysteine-rich receptor-like protein kinase 29;,Cysteine-rich receptor-like protein kinase 10;,Cysteine-rich receptor-like protein kinase 11;,Cysteine-rich receptor-like protein kinase 25;,Cysteine-rich receptor-like protein kinase 26;, KEGG:ath:AT4G23190,KEGG:ath:AT4G23180,KEGG:ath:AT4G05200,KEGG:ath:AT4G21410,
331	4	1	1	0	1	1	Fasciclin-like arabinogalactan protein 14;, KEGG:ath:AT3G12660,
332	5	1	1	1	1	1	GPI transamidase component PIG-S;, KEGG:rno:303277,
333	6	1	1	1	2	1	CDK-activating kinase assembly factor MAT1;, KEGG:hsa:4331,
334	15	3	3	3	3	3	BTB/POZ domain-containing protein POB1;, KEGG:ath:AT3G61600,
335	5	1	1	1	1	1	UBP1-associated protein 2A;, KEGG:ath:AT3G56860,
336	3	1	1	0	0	1	F-box/LRR-repeat protein At4g29420;, KEGG:ath:AT4G29420,
337	2698	55	74	1968	533	68	Cytochrome b6 {ECO:0000255|HAMAP-Rule:MF_00633};,Diacylglycerol kinase 4 {ECO:0000303|PubMed:30628082};,Glucan endo-1,3-beta-glucosidase 3;,LYR motif-containing protein 4 {ECO:0000250|UniProtKB:Q9HD34};,Transposon Tf2-9 polyprotein;,Ankyrin repeat, PH and SEC7 domain containing protein secG;,Photosystem II CP43 reaction center protein {ECO:0000255|HAMAP-Rule:MF_01496};,ATP-dependent zinc metallop…
338	5	1	1	1	1	1	DELLA protein RGL2 {ECO:0000303|PubMed:11877383};, KEGG:ath:AT3G03450,
339	12	3	2	1	2	4	Cinnamoyl-CoA reductase CAD2 {ECO:0000305|PubMed:25217505};,Cinnamoyl-CoA reductase 1 {ECO:0000303|PubMed:24985707, ECO:0000303|PubMed:25217505};,Phenylacetaldehyde reductase {ECO:0000303|PubMed:20650544};, KEGG:mtr:11427940,
340	5	1	1	1	1	1	Protein phosphatase 2C 51 {ECO:0000305};,Probable protein phosphatase 2C 8;, KEGG:osa:4339671,KEGG:osa:4324182,
341	6	2	2	0	1	1	None
342	5	1	1	1	1	1	Non-specific lipid transfer protein GPI-anchored 5 {ECO:0000303|PubMed:23893219};, KEGG:ath:AT3G22600,
343	2	1	1	0	0	0	None
344	5	1	1	1	1	1	Ubiquitin-like-specific protease ESD4;, KEGG:ath:AT4G15880,
345	13	4	3	2	2	2	Glutamyl-tRNA reductase 1, chloroplastic;, KEGG:csv:101220615,
346	5	1	1	1	1	1	Glycosyltransferase BC10 {ECO:0000305};, KEGG:osa:4337935,
347	15	3	3	3	3	3	Anthranilate synthase alpha subunit 1, chloroplastic {ECO:0000303|PubMed:7972519};,Anthranilate synthase alpha subunit 2, chloroplastic;, KEGG:ath:AT5G05730,KEGG:ath:AT2G29690,
348	5	1	1	1	1	1	Adenylate kinase 2, chloroplastic;, KEGG:ath:AT5G47840,
349	6	2	1	1	1	1	E3 ubiquitin-protein ligase MARCHF1;, KEGG:mmu:72925,
350	10	2	2	2	2	2	Aspartic proteinase PCS1;, KEGG:ath:AT5G02190,
351	5	1	1	1	1	1	Small ribosomal subunit protein bS16m/bS16c {ECO:0000303|PubMed:36423343, ECO:0000305};, KEGG:ath:AT5G56940,
352	13	4	2	3	2	2	Glycerol-3-phosphate dehydrogenase [NAD(+)] 2, chloroplastic;,Probable WRKY transcription factor 70 {ECO:0000303|Ref.1};,WRKY DNA-binding transcription factor 70 {ECO:0000303|PubMed:21898085};, KEGG:ath:AT3G56400,KEGG:sly:101256570,KEGG:ath:AT2G40690,
353	22	9	7	2	2	2	Protein PSK SIMULATOR 1 {ECO:0000303|PubMed:25062973};,Protein PSK SIMULATOR 3 {ECO:0000303|PubMed:25062973};, KEGG:ath:AT5G08660,KEGG:ath:AT1G34320,
354	5	1	1	1	1	1	None
355	10	2	2	2	2	2	Small ribosomal subunit protein uS10c {ECO:0000303|PubMed:28007896};,Small ribosomal subunit protein uS10c {ECO:0000305};,
356	10	2	2	2	2	2	E3 ubiquitin-protein ligase At3g02290;, KEGG:ath:AT3G02290,
357	5	1	1	1	1	1	Probable ADP,ATP carrier protein At5g56450;, KEGG:ath:AT5G56450,
358	5	1	1	1	1	1	Ecotropic viral integration site 5 protein homolog;, KEGG:hsa:7813,
359	5	1	1	1	1	1	Cation/H(+) antiporter 15;, KEGG:ath:AT2G13620,
360	9	2	2	1	2	2	Transcription factor MYC1 {ECO:0000303|PubMed:24884371};,Transcription factor MYC2 {ECO:0000303|PubMed:24483714};, KEGG:sly:544165,
361	10	2	2	2	2	2	None
362	5	1	1	1	1	1	None
363	5	1	1	1	1	1	Protein GAMETE EXPRESSED 3;, KEGG:ath:AT5G16020,
364	9	2	2	2	2	1	ABC transporter B family member 26, chloroplastic;, KEGG:ath:AT1G70610,
365	5	1	1	1	1	1	Large ribosomal subunit protein uL18 {ECO:0000255|HAMAP-Rule:MF_01337};, KEGG:syn:sll1811,KEGG:lca:LSEI_2487,
366	5	1	1	1	1	1	Demethylmenaquinone methyltransferase {ECO:0000255|HAMAP-Rule:MF_01813};, KEGG:ljo:LJ_0053,
367	5	1	1	1	1	1	None
368	13	4	2	2	3	2	Protein TIC236, chloroplastic {ECO:0000305};, KEGG:ath:AT2G25660,
369	5	1	1	1	1	1	Gibberellin 2-beta-dioxygenase 6 {ECO:0000305};, KEGG:osa:4336431,
370	4	1	0	1	1	1	Kinase-interacting family protein {ECO:0000305|PubMed:22840520};, KEGG:ath:AT1G48405,
371	5	1	1	1	1	1	Mannosylfructose-phosphate synthase {ECO:0000312|EMBL:ABU63292.1};,O-antigen chain mannosyltransferase B {ECO:0000305};, KEGG:atu:Atu0661,
372	22	5	5	3	3	6	Probable inositol transporter 2;, KEGG:ath:AT1G30220,
373	11	1	1	1	1	7	Probable ribonuclease P/MRP protein subunit POP5 {ECO:0000250|UniProtKB:Q969H6};, KEGG:ath:AT1G04635,
374	10	2	2	2	2	2	Calreticulin-3;, KEGG:ath:AT1G08450,
375	5	1	1	1	1	1	Mitochondrial pyruvate carrier 4 {ECO:0000305};, KEGG:ath:AT4G22310,
376	5	1	1	1	1	1	D-cysteine desulfhydrase 1, mitochondrial {ECO:0000303|PubMed:37499960};, KEGG:osa:4330881,
377	5	1	1	1	1	1	Filament-like plant protein 7;, KEGG:ath:AT2G23360,
378	15	3	3	3	3	3	Sodium/hydrogen exchanger 2;, KEGG:ath:AT3G05030,
379	11	2	0	3	3	3	None
380	26	5	5	5	6	5	Alpha/beta hydrolase domain-containing protein 17A {ECO:0000305};,Alpha/beta hydrolase domain-containing protein 17B {ECO:0000305};,Alpha/beta hydrolase domain-containing protein 17C {ECO:0000305};, KEGG:xla:447065,KEGG:hsa:81926,KEGG:dre:393126,KEGG:xla:446585,
381	5	1	1	1	1	1	PITH domain-containing protein 1;,PITH domain-containing protein GA19395;, KEGG:xla:444807,KEGG:dpo:4816496,
382	9	1	2	2	2	2	Chaperone protein dnaJ 10;, KEGG:ath:AT1G76700,
383	5	1	1	1	1	1	None
384	5	1	1	1	1	1	Protein NUCLEAR FUSION DEFECTIVE 2 {ECO:0000303|PubMed:16698901};, KEGG:ath:AT1G24450,
385	5	1	1	1	1	1	Biotin synthase, mitochondrial;, KEGG:ath:AT2G43360,
386	5	1	1	1	1	1	None
387	10	2	2	2	2	2	Probable polygalacturonase;,
388	10	1	2	2	2	3	Probable dual-specificity RNA methyltransferase RlmN {ECO:0000255|HAMAP-Rule:MF_01849};,DNA repair protein RAD4 {ECO:0000312|EMBL:AED92319.1};, KEGG:ath:AT5G16630,KEGG:tel:tll2425,
389	5	1	1	1	1	1	Protein IQ-DOMAIN 29 {ECO:0000303|PubMed:16368012};, KEGG:ath:AT2G02790,
390	5	1	1	1	1	1	Protein PHYTOCHROME KINASE SUBSTRATE 4;, KEGG:ath:AT5G04190,
391	11	2	2	3	2	2	Disease resistance protein RUN1 {ECO:0000305};,Disease resistance protein Roq1 {ECO:0000305};,Disease resistance protein RPV1 {ECO:0000305};,
392	5	1	1	1	1	1	Transcription factor bHLH146;, KEGG:ath:AT4G30180,
393	9	2	2	1	2	2	Non-specific lipid transfer protein GPI-anchored 14 {ECO:0000303|PubMed:23893219};, KEGG:ath:AT2G44300,
394	11	1	1	3	3	3	Bifunctional aspartate aminotransferase and glutamate/aspartate-prephenate aminotransferase {ECO:0000303|PubMed:21102469};,
395	5	1	1	1	1	1	Autophagy-related protein 18h;, KEGG:ath:AT1G54710,
396	5	1	1	1	1	1	Replication protein A 32 kDa subunit A;, KEGG:ath:AT2G24490,
397	5	1	1	1	1	1	None
398	5	1	1	1	1	1	Pentatricopeptide repeat-containing protein At1g77360, mitochondrial;, KEGG:ath:AT1G77360,
399	6	2	1	1	1	1	RGS1-HXK1-interacting protein 1 {ECO:0000303|PubMed:26528314};, KEGG:ath:AT4G26410,
400	5	1	1	1	1	1	Receptor protein-tyrosine kinase CEPR1 {ECO:0000303|PubMed:25324386};, KEGG:ath:AT5G49660,
401	5	1	1	1	1	1	None
402	5	1	1	1	1	1	None
403	3	1	1	0	0	1	None
404	91	23	14	3	25	26	Putative disease resistance protein At3g14460;,Putative disease resistance RPP13-like protein 1;, KEGG:ath:AT3G14460,KEGG:ath:AT3G14470,
405	5	1	1	1	1	1	None
406	5	1	1	1	1	1	UPF0426 protein At1g28150, chloroplastic;, KEGG:ath:AT1G28150,
407	14	2	3	3	3	3	Solute carrier family 25 member 44 {ECO:0000305};,Mitochondrial substrate carrier family protein J;,Solute carrier family 25 member 44;, KEGG:mmu:229517,KEGG:hsa:9673,
408	5	1	1	1	1	1	Uncharacterized protein sll0005;, KEGG:syn:sll0005,
409	10	2	2	2	2	2	Probable pectinesterase/pectinesterase inhibitor 40;,Probable pectinesterase/pectinesterase inhibitor 39;, KEGG:ath:AT4G02320,KEGG:ath:AT4G02300,
410	6	2	1	1	1	1	AP-5 complex subunit zeta-1;, KEGG:mmu:231855,
411	5	1	1	1	1	1	Protein CHAPERONE-LIKE PROTEIN OF POR1, chloroplastic {ECO:0000303|PubMed:24151298};,
412	5	1	1	1	1	1	Protein RETARDED ROOT GROWTH, mitochondrial {ECO:0000303|PubMed:21984726};, KEGG:ath:AT1G69380,
413	14	2	3	3	3	3	Homeobox-leucine zipper protein REVOLUTA {ECO:0000303|PubMed:7555701};,Homeobox-leucine zipper protein ATHB-14;,Homeobox-leucine zipper protein HOX32;, KEGG:ath:AT5G60690,KEGG:ath:AT2G34710,KEGG:osa:4333544,
414	10	2	2	2	2	2	Hexosyltransferase GAUT11 {ECO:0000305};, KEGG:ath:AT1G18580,
415	33	7	6	6	7	7	Nuclear transcription factor Y subunit B-8 {ECO:0000305};,Nuclear transcription factor Y subunit B-3 {ECO:0000303|PubMed:11250072, ECO:0000303|PubMed:11867211};,Nuclear transcription factor Y subunit B-7 {ECO:0000303|PubMed:11250072};,Nuclear transcription factor Y subunit B-2 {ECO:0000303|PubMed:11250072};, KEGG:ath:AT5G47640,KEGG:ath:AT4G14540,KEGG:ath:AT2G13570,
416	5	1	1	1	1	1	Transcription factor MYB14 {ECO:0000303|PubMed:9839469};,Transcription factor MYB63 {ECO:0000303|PubMed:9839469};,Transcription factor MYB13 {ECO:0000305};, KEGG:ath:AT2G31180,KEGG:ath:AT1G06180,
417	15	3	3	3	3	3	Ribulose bisphosphate carboxylase/oxygenase activase, chloroplastic;,Ribulose bisphosphate carboxylase/oxygenase activase 1, chloroplastic;,
418	5	1	1	1	1	1	None
419	5	1	1	1	1	1	Putative ubiquitin-conjugating enzyme E2 38;,
420	5	1	1	1	1	1	RING-H2 finger protein ATL16;, KEGG:ath:AT5G43420,
421	30	9	5	3	6	7	Pleiotropic drug resistance protein 1;, KEGG:nta:107799533,
422	5	1	1	1	1	1	Receptor-like protein EIX2 {ECO:0000305};, KEGG:sly:101263330,
423	5	1	1	1	1	1	Protein disulfide isomerase-like 2-3;, KEGG:osa:4347226,
424	11	3	2	2	2	2	Synaptotagmin-5;,Synaptotagmin-4;, KEGG:ath:AT5G11100,KEGG:ath:AT1G05500,
425	10	2	2	2	2	2	Coatomer subunit gamma-2;,Coatomer subunit gamma;, KEGG:ath:AT4G34450,KEGG:osa:4342665,
426	10	2	2	2	2	2	Cell division control protein 2 homolog;,
427	42	8	8	9	9	8	Actin;,Actin-97;,Actin-1;,Actin-11;,Actin-101;,Actin-2;,Actin-3;, KEGG:osa:4333919,KEGG:osa:4349087,KEGG:ath:AT3G12110,KEGG:ghi:107932458,KEGG:ghi:107953109,
428	5	1	1	1	1	1	Probable 3-beta-hydroxysteroid-Delta(8),Delta(7)-isomerase;, KEGG:osa:4326449,
429	10	2	2	2	2	2	Transcription factor DYT1 {ECO:0000305};, KEGG:ath:AT4G21330,
430	5	1	1	1	1	1	None
431	32	8	6	5	4	9	NADPH-dependent aldo-keto reductase, chloroplastic {ECO:0000303|PubMed:21169366};, KEGG:ath:AT2G37770,
432	5	1	1	1	1	1	Blue copper protein 1a {ECO:0000303|PubMed:20687807};,Blue copper protein 1b {ECO:0000303|PubMed:20687807};, KEGG:mtr:11437278,KEGG:mtr:11427104,
433	5	1	1	1	1	1	Importin-5;,Ran-binding protein 6;, KEGG:mmu:240614,KEGG:hsa:3843,
434	5	1	1	1	1	1	Probable glycosyltransferase At3g07620;,Probable glycosyltransferase At5g03795;, KEGG:ath:AT5G03795,
435	5	1	1	1	1	1	Transcription termination factor MTEF1, chloroplastic {ECO:0000305};, KEGG:ath:AT2G03050,
436	5	1	1	1	1	1	Pentatricopeptide repeat-containing protein At2g40720;,Pentatricopeptide repeat-containing protein At3g09040, mitochondrial;, KEGG:ath:AT2G40720,KEGG:ath:AT3G09040,
437	10	2	2	2	2	2	None
438	5	1	1	1	1	1	Probable 3-ketoacyl-CoA synthase 21 {ECO:0000303|PubMed:18465198};, KEGG:ath:AT5G49070,
439	5	1	1	0	2	1	Transcription termination factor MTERF6, chloroplastic/mitochondrial {ECO:0000305};, KEGG:ath:AT4G38160,
440	5	1	0	3	1	0	None
441	5	1	1	1	1	1	Protein FAR1-RELATED SEQUENCE 6;, KEGG:ath:AT1G52520,
442	10	2	2	2	2	2	Probable L-type lectin-domain containing receptor kinase S.7 {ECO:0000303|PubMed:19773388};,L-type lectin-domain containing receptor kinase VIII.1;,L-type lectin-domain containing receptor kinase VIII.2 {ECO:0000303|PubMed:19773388};, KEGG:ath:AT3G53380,
443	5	1	1	1	1	1	WUSCHEL-related homeobox 8 {ECO:0000303|PubMed:14711878};,WUSCHEL-related homeobox 9 {ECO:0000303|PubMed:14711878};, KEGG:ath:AT5G45980,KEGG:ath:AT2G33880,
444	9	2	2	1	2	2	Allene oxide synthase 1, chloroplastic {ECO:0000303|PubMed:12351632};,Allene oxide synthase 3 {ECO:0000303|PubMed:12351632};, KEGG:sly:101247264,
445	10	2	2	2	2	2	Histone acetyltransferase HAC1;,Histone acetyltransferase HAC12;, KEGG:ath:AT1G16710,
446	21	3	3	3	8	4	Disease resistance protein RUN1 {ECO:0000305};,Disease resistance protein Roq1 {ECO:0000305};,
447	5	1	1	1	1	1	Mitochondrial import inner membrane translocase subunit TIM50;, KEGG:ath:AT1G55900,
448	5	1	1	1	1	1	Fumarylacetoacetase {ECO:0000305};, KEGG:ath:AT1G12050,
449	10	3	2	1	2	2	Apyrase 2;, KEGG:ath:AT5G18280,
450	5	1	1	1	1	1	G-type lectin S-receptor-like serine/threonine-protein kinase At4g27290;, KEGG:ath:AT4G27290,
451	5	1	1	1	1	1	Transcription factor MYB15 {ECO:0000305};, KEGG:ath:AT3G23250,
452	20	4	4	4	4	4	Delta-1-pyrroline-5-carboxylate synthase 1 {ECO:0000305};,Delta-1-pyrroline-5-carboxylate synthase;, KEGG:sly:544281,KEGG:osa:4338979,
453	5	1	1	1	1	1	None
454	5	1	1	1	1	1	Zinc-regulated GTPase metalloprotein activator 1A {ECO:0000303|PubMed:35584702};,Zinc-regulated GTPase metalloprotein activator 1B {ECO:0000303|PubMed:35584702};,Zinc-regulated GTPase metalloprotein activator 1 {ECO:0000303|PubMed:35584702};, KEGG:hsa:150472,
455	10	2	2	2	2	2	F-box protein PP2-A13;, KEGG:ath:AT3G61060,
456	10	2	2	2	2	2	Receptor-like protein kinase THESEUS 1;, KEGG:ath:AT5G54380,
457	40	10	9	4	9	8	Polygalacturonase;,
458	7	1	1	2	2	1	Thioredoxin-like protein CITRX2, chloroplastic {ECO:0000305};,Thioredoxin-like protein CITRX, chloroplastic {ECO:0000305};, KEGG:ath:AT3G06730,
459	5	1	1	1	1	1	Uncharacterized protein SYNPCC7002_A1590;, KEGG:syp:SYNPCC7002_A1590,
460	19	4	4	3	4	4	Ras-related protein Rab2BV;,Ras-related protein RABA2a;,Ras-related protein Rab11C;, KEGG:bvg:104900042,KEGG:ath:AT1G09630,
461	6	2	1	1	1	1	Protein MICRORCHIDIA 6 {ECO:0000303|PubMed:22555433};, KEGG:ath:AT1G19100,
462	5	1	1	1	1	1	P24 oleosin isoform B;,P24 oleosin isoform A;, KEGG:gmx:548081,
463	5	1	1	1	1	1	Importin-11;, KEGG:hsa:51194,
464	9	1	2	2	2	2	Geranylgeranyl diphosphate reductase, chloroplastic;, KEGG:ag:CAA07683,KEGG:nta:107783257,
465	5	1	1	1	1	1	None
466	10	2	2	2	2	2	Thaumatin-like protein;,
467	15	3	3	3	3	3	Vacuolar protein sorting-associated protein 32 homolog 1;,Vacuolar protein sorting-associated protein 32 homolog 2;, KEGG:ath:AT2G19830,
468	10	2	2	2	2	2	None
469	10	2	2	2	2	2	RAB11-binding protein RELCH {ECO:0000305};,RAB11-binding protein RELCH homolog;, KEGG:xtr:100145663,KEGG:mmu:227446,
470	30	6	5	6	7	6	Phenylalanine ammonia-lyase class 3;,Phenylalanine ammonia-lyase 1;,Phenylalanine ammonia-lyase 2;,Phenylalanine ammonia-lyase class 2;, KEGG:pvu:PHAVU_008G289500g,KEGG:cam:101509831,
471	4	1	0	1	1	1	Amino acid transporter AVT1I {ECO:0000305};, KEGG:ath:AT3G28960,
472	6	1	2	1	1	1	Membrane-anchored ubiquitin-fold protein 3;, KEGG:ath:AT4G24990,
473	6	2	1	1	1	1	Thylakoid membrane protein slr0575;, KEGG:syn:slr0575,
474	5	1	1	1	1	1	Pentatricopeptide repeat-containing protein At1g31430;, KEGG:ath:AT1G31430,
475	5	1	1	1	1	1	Quinone oxidoreductase-like protein 2 homolog;,Abhydrolase domain-containing protein abhd-5.2 {ECO:0000305};, KEGG:cel:CELE_C37H5.3,
476	5	1	1	1	1	1	ABC transporter I family member 20;, KEGG:ath:AT5G02270,
477	31	11	17	1	1	1	65-kDa microtubule-associated protein 6;, KEGG:ath:AT2G01910,
478	5	1	1	1	1	1	Ubiquitin carboxyl-terminal hydrolase 6;, KEGG:ath:AT1G51710,
479	2	1	1	0	0	0	None
480	10	2	2	2	2	2	Phosphoenolpyruvate/phosphate translocator 1, chloroplastic;,Triose phosphate/phosphate translocator, non-green plastid, chloroplastic;, KEGG:osa:4346653,KEGG:ath:AT5G33320,
481	5	1	1	1	1	1	Transcription factor MYB36 {ECO:0000303|PubMed:9839469};, KEGG:ath:AT5G57620,
482	5	1	1	1	1	1	La-related protein 6B;, KEGG:ath:AT2G43970,
483	10	2	2	2	2	2	ARM REPEAT PROTEIN INTERACTING WITH ABF2;, KEGG:ath:AT5G19330,
484	5	1	1	1	1	1	None
485	5	1	1	1	1	1	Ninja-family protein AFP2;,Ninja-family protein AFP3;, KEGG:ath:AT1G13740,
486	5	1	1	1	1	1	WAT1-related protein At2g37460;, KEGG:ath:AT2G37460,
487	3	1	0	0	1	1	None
488	5	1	1	1	1	1	Serine/threonine-protein phosphatase 2A activator;, KEGG:bta:514460,
489	7	3	2	0	1	1	Pentatricopeptide repeat-containing protein At5g12100, mitochondrial;, KEGG:ath:AT5G12100,
490	14	3	3	2	3	3	MLO-like protein 6;, KEGG:ath:AT1G61560,
491	5	1	1	1	1	1	Metal tolerance protein 10;, KEGG:ath:AT1G16310,
492	13	3	2	3	3	2	Ribose-phosphate pyrophosphokinase 1;,Ribose-phosphate pyrophosphokinase 1, chloroplastic;, KEGG:ath:AT2G35390,KEGG:ath:AT2G44530,
493	5	1	1	1	1	1	LOB domain-containing protein 27;, KEGG:ath:AT3G47870,
494	3	1	1	0	0	1	Non-specific lipid-transfer protein;,
495	13	4	3	2	2	2	Small ribosomal subunit protein uS15 {ECO:0000305};, KEGG:gmx:100790163,KEGG:gmx:547745,
496	6	2	2	1	1	0	None
497	55	20	10	1	6	18	LRR receptor-like serine/threonine-protein kinase IOS1 {ECO:0000303|PubMed:21711359};,Putative leucine-rich repeat receptor-like protein kinase At2g19210;, KEGG:ath:AT2G19210,KEGG:ath:AT1G51800,
498	5	2	1	0	1	1	Basic helix-loop-helix protein A;,
499	10	2	2	2	2	2	Phosphatidylinositol 4-phosphate 5-kinase 1;,Phosphatidylinositol 4-phosphate 5-kinase 5;,Phosphatidylinositol 4-phosphate 5-kinase 8;, KEGG:ath:AT1G60890,KEGG:ath:AT2G41210,KEGG:ath:AT1G21980,
500	5	1	1	1	1	1	TITAN-like protein {ECO:0000303|PubMed:22991160};, KEGG:ath:AT4G24900,
501	10	2	2	2	2	2	Probable serine/threonine-protein kinase SIS8 {ECO:0000305};, KEGG:ath:AT1G73660,
502	5	1	1	1	1	1	Protein S40-7 {ECO:0000303|PubMed:20238146};,Protein S40-1 {ECO:0000303|PubMed:20238146};, KEGG:ath:AT1G29640,
503	4	1	1	1	1	0	Basic blue protein;,
504	7	2	1	1	1	2	Heterodimeric geranylgeranyl pyrophosphate synthase large subunit 1, chloroplastic;,Heterodimeric geranylgeranyl pyrophosphate synthase small subunit, chloroplastic;,Geranylgeranyl pyrophosphate synthase, chloroplastic/chromoplastic;, KEGG:ath:AT4G38460,
505	10	2	2	2	2	2	DDT domain-containing protein DDR4 {ECO:0000305};, KEGG:ath:AT1G18950,
506	10	2	2	2	2	2	Probable magnesium transporter NIPA4;,Probable magnesium transporter NIPA2;, KEGG:ath:AT4G13800,KEGG:ath:AT1G71900,
507	5	1	1	1	1	1	NADH dehydrogenase [ubiquinone] 1 beta subcomplex subunit 2;, KEGG:ath:AT1G76200,
508	5	1	1	1	1	1	Transcription factor IIIB 90 kDa subunit;,
509	5	1	1	1	1	1	Probable arabinose 5-phosphate isomerase;, KEGG:ath:AT3G54690,
510	5	1	1	1	1	1	Putative non-specific lipid-transfer protein 14;, KEGG:ath:AT5G62065,
511	18	4	3	3	4	4	Ras-related protein RABH1b;,Ras-related protein RABH1e;, KEGG:ath:AT5G10260,KEGG:ath:AT2G44610,
512	5	1	1	1	1	1	None
513	12	3	3	2	2	2	CCR4-NOT transcription complex subunit 3 {ECO:0000305};, KEGG:hsa:4849,
514	10	2	2	2	2	2	CBL-interacting serine/threonine-protein kinase 1;, KEGG:ath:AT3G17510,
515	10	2	2	2	2	2	Protein indeterminate-domain 5, chloroplastic {ECO:0000303|PubMed:16784536};, KEGG:ath:AT2G02070,
516	5	1	1	1	1	1	Autophagy-related protein 18a;, KEGG:ath:AT3G62770,
517	5	1	1	1	1	1	Ataxin-3 homolog;, KEGG:ath:AT3G54130,
518	6	2	1	1	1	1	U-box domain-containing protein 52;, KEGG:ath:AT5G61550,
519	22	4	4	4	5	5	None
520	10	2	2	2	2	2	Translation initiation factor eIF2B subunit beta;, KEGG:ddi:DDB_G0291271,
521	5	1	1	1	1	1	Auxin efflux carrier component 2 {ECO:0000303|PubMed:9843496};, KEGG:ath:AT5G57090,
522	5	1	1	1	1	1	Peroxidase 5 {ECO:0000250|UniProtKB:P22195};,
523	5	1	1	1	1	1	DNA repair RAD52-like protein 2, chloroplastic {ECO:0000305};, KEGG:ath:AT5G47870,
524	20	4	4	4	4	4	Type IV inositol polyphosphate 5-phosphatase 6 {ECO:0000305};,Type I inositol polyphosphate 5-phosphatase 4 {ECO:0000305};,Type IV inositol polyphosphate 5-phosphatase 7 {ECO:0000303|PubMed:21677096};, KEGG:ath:AT1G05470,KEGG:ath:AT3G63240,KEGG:ath:AT2G32010,
525	10	2	2	2	2	2	G2/mitotic-specific cyclin S13-6;, KEGG:gmx:547920,
526	10	2	2	2	2	2	Two-component response regulator ORR9 {ECO:0000305};,Two-component response regulator ORR10 {ECO:0000305};,Two-component response regulator ARR8;, KEGG:ath:AT2G41310,KEGG:osa:4351462,KEGG:osa:4349747,
527	21	5	4	5	5	2	Pre-mRNA-splicing factor SYF1;,Pre-mRNA-splicing factor syf1 homolog {ECO:0000250|UniProtKB:Q9HCS7};, KEGG:rno:245976,KEGG:mmu:67439,KEGG:dme:Dmel_CG6197,
528	2	1	1	0	0	0	None
529	5	1	1	1	1	1	PRA1 family protein A1;, KEGG:ath:AT5G02040,
530	10	2	2	2	2	2	Snakin-2;, KEGG:sot:102582131,
531	5	2	1	0	0	2	Axial regulator YABBY 4;, KEGG:ath:AT1G23420,
532	5	1	1	1	1	1	E3 ubiquitin-protein ligase SGR9, amyloplastic;, KEGG:ath:AT5G02750,
533	28	7	6	5	5	5	Cellulose synthase-like protein D3;,Cellulose synthase-like protein D4;,Cellulose synthase-like protein D5;, KEGG:ath:AT4G38190,KEGG:ath:AT3G03050,KEGG:ath:AT1G02730,
534	2	1	1	0	0	0	None
535	5	1	1	1	1	1	None
536	5	1	1	1	1	1	None
537	20	4	4	4	4	4	Probable methyltransferase PMT8;,Probable methyltransferase PMT3;,Probable methyltransferase PMT1;, KEGG:ath:AT3G23300,KEGG:ath:AT1G04430,
538	5	1	1	1	1	1	Beta-1,2-xylosyltransferase {ECO:0000303|PubMed:10781814};, KEGG:ath:AT5G55500,
539	5	1	1	1	1	1	Uncharacterized protein C9orf85 homolog;, KEGG:mmu:66206,
540	5	1	1	1	1	1	Mitochondrial import receptor subunit TOM40-1 {ECO:0000303|PubMed:11161051};, KEGG:ath:AT3G20000,
541	5	1	1	1	1	1	N-glycosylase/DNA lyase OGG1;, KEGG:ath:AT1G21710,
542	5	1	1	1	1	1	Probable glucuronoxylan glucuronosyltransferase F8H;, KEGG:ath:AT5G22940,
543	5	1	1	1	1	1	Ethylene-responsive transcription factor CRF4;, KEGG:ath:AT4G27950,
544	5	1	1	1	1	1	Putative TrmH family tRNA/rRNA methyltransferase;,23S rRNA (guanosine(2553)-2'-O)-methyltransferase RlmP {ECO:0000305};, KEGG:sam:MW0487,
545	5	1	1	1	1	1	None
546	10	3	2	2	2	1	G-type lectin S-receptor-like serine/threonine-protein kinase LECRK1 {ECO:0000305};,G-type lectin S-receptor-like serine/threonine-protein kinase LECRK3 {ECO:0000305};, KEGG:osa:4335148,
547	9	2	2	0	2	3	G-type lectin S-receptor-like serine/threonine-protein kinase At1g11410;,Receptor-like serine/threonine-protein kinase SD1-6;,Cysteine-rich receptor-like protein kinase 6;, KEGG:ath:AT1G65800,KEGG:ath:AT4G23140,KEGG:ath:AT1G11410,
548	5	1	1	1	1	1	None
549	5	1	1	1	1	1	Mitochondrial import receptor subunit TOM9-2;, KEGG:ath:AT5G43970,
550	5	1	1	1	1	1	Rho GDP-dissociation inhibitor 1;, KEGG:ath:AT3G07880,
551	10	2	2	2	2	2	Cytochrome P450 78A5;, KEGG:ath:AT1G13710,
552	15	3	3	3	3	3	Calcium-dependent protein kinase 2;,Calcium-dependent protein kinase 10 {ECO:0000305};,Calcium-dependent protein kinase 20;,Calcium-dependent protein kinase 1;, KEGG:ath:AT3G10660,KEGG:ath:AT5G04870,KEGG:ath:AT2G38910,
553	10	2	2	2	2	2	WUSCHEL-related homeobox 5;, KEGG:ath:AT3G11260,
554	5	1	1	1	1	1	Pentatricopeptide repeat-containing protein At2g22070;, KEGG:ath:AT2G22070,
555	5	1	1	1	1	1	Coilin {ECO:0000303|PubMed:16624863};, KEGG:ath:AT1G13030,
556	5	1	1	1	1	1	EG45-like domain containing protein 2;,EG45-like domain containing protein;, KEGG:ath:AT2G18660,
557	5	1	1	1	1	1	Putative pentatricopeptide repeat-containing protein At1g10330;, KEGG:ath:AT1G10330,
558	11	2	2	2	3	2	Jasmonate-induced oxygenase 2 {ECO:0000303|PubMed:28559313};, KEGG:ath:AT5G05600,
559	9	2	2	1	2	2	Cytochrome B5-like protein {ECO:0000303|PubMed:19054355};, KEGG:ath:AT1G60660,
560	14	3	3	3	3	2	Protein NUCLEAR FUSION DEFECTIVE 4 {ECO:0000303|PubMed:16698901};, KEGG:ath:AT1G31470,
561	5	1	1	1	1	1	Nucleolar protein 10;, KEGG:xla:398690,
562	10	2	2	2	2	2	Pectinesterase 3;,Pectinesterase/pectinesterase inhibitor U1;, KEGG:sly:544016,
563	2	1	1	0	0	0	None
564	5	1	1	1	1	1	Ethylene-response factor C3 {ECO:0000305};,Ethylene-responsive transcription factor 1B;, KEGG:ath:AT3G23240,KEGG:sly:101247461,
565	10	2	2	2	2	2	bZIP transcription factor TGA10 {ECO:0000303|PubMed:12777042};, KEGG:nta:107804246,
566	5	1	1	1	1	1	F-box/kelch-repeat protein SKIP25;, KEGG:ath:AT1G31350,
567	9	2	2	2	1	2	Beta-glucuronosyltransferase GlcAT14B {ECO:0000305};, KEGG:ath:AT5G15050,
568	13	2	1	3	4	3	Endo-1,4-beta-xylanase 4 {ECO:0000303|PubMed:12154138};,Endo-1,4-beta-xylanase 5-like {ECO:0000305};, KEGG:ath:AT4G33820,KEGG:ath:AT2G14690,
569	5	1	1	1	1	1	Primary amine oxidase 1 {ECO:0000303|PubMed:9681017};, KEGG:ath:AT4G14940,
570	5	1	1	1	1	1	None
571	5	1	1	1	1	1	None
572	8	2	1	1	2	2	Short-chain dehydrogenase reductase 3b;, KEGG:ath:AT2G47140,
573	15	4	1	3	3	4	Aspartic proteinase CDR1;, KEGG:ath:AT5G33340,
574	5	1	1	1	1	1	Transcription factor MYB36 {ECO:0000303|PubMed:9839469};, KEGG:ath:AT5G57620,
575	11	3	1	2	2	3	Serine/arginine-rich SC35-like splicing factor SCL30A;, KEGG:ath:AT3G13570,
576	13	3	3	1	3	3	Senescence-specific cysteine protease SAG39 {ECO:0000305};, KEGG:osa:107276017,
577	5	1	1	1	1	1	Agamous-like MADS-box protein AGL80;, KEGG:ath:AT5G48670,
578	15	3	3	3	3	3	Omega-6 fatty acid desaturase, endoplasmic reticulum isozyme 1;,Omega-6 fatty acid desaturase, endoplasmic reticulum isozyme 2;, KEGG:gmx:547814,KEGG:gmx:547815,
579	5	1	1	1	1	1	Putative RING-H2 finger protein ATL21A;, KEGG:ath:AT2G46495,
580	10	2	2	2	2	2	Transcription factor bHLH48;, KEGG:ath:AT2G42300,
581	7	2	2	1	1	1	Transcriptional adapter ADA2;, KEGG:osa:4334126,
582	5	1	1	1	1	1	Disease resistance protein RGA5 {ECO:0000305};,Heavy metal-associated isoprenylated plant protein 47 {ECO:0000303|PubMed:21072340, ECO:0000303|PubMed:23368984};, KEGG:ath:AT3G20180,
583	5	1	1	1	1	1	PGR5-like protein 1B, chloroplastic;, KEGG:ath:AT4G11960,
584	14	3	1	2	4	4	Receptor-like protein EIX2 {ECO:0000305};, KEGG:sly:101263330,
585	5	1	1	1	1	1	Peptidyl-prolyl cis-trans isomerase FKBP16-3, chloroplastic;, KEGG:ath:AT2G43560,
586	5	1	1	1	1	1	Putative disease resistance protein RGA3;,
587	5	1	1	1	1	1	Protein GID8 homolog {ECO:0000305};, KEGG:ath:AT1G61150,
588	5	1	1	1	1	1	BRAP2 RING ZnF UBP domain-containing protein 1 {ECO:0000303|PubMed:20810661};, KEGG:ath:AT2G42160,
589	5	1	1	1	1	1	Pentatricopeptide repeat-containing protein At5g15280, mitochondrial;, KEGG:ath:AT5G15280,
590	4	1	1	1	1	0	Probable helicase CHR10 {ECO:0000305};, KEGG:ath:AT2G44980,
591	5	1	1	1	1	1	Topless-related protein 2;, KEGG:ath:AT3G16830,
592	4	1	1	0	1	1	None
593	5	1	1	1	1	1	Putative E3 ubiquitin-protein ligase RF298;,Putative E3 ubiquitin-protein ligase RF4;, KEGG:ath:AT4G03000,
594	5	1	1	1	1	1	None
595	10	2	2	2	2	2	Cationic amino acid transporter 1;, KEGG:ath:AT4G21120,
596	4	1	0	1	1	1	LRR receptor-like serine/threonine-protein kinase RPK2;, KEGG:ath:AT3G02130,
597	5	1	1	1	1	1	LRR receptor-like serine/threonine-protein kinase GSO1 {ECO:0000303|PubMed:18088309};,Receptor-like protein 12 {ECO:0000303|PubMed:18434605};,LRR receptor-like serine/threonine-protein kinase EFR {ECO:0000303|PubMed:16713565};, KEGG:ath:AT1G71400,
598	10	2	2	2	2	2	Ribonuclease TUDOR 1 {ECO:0000303|PubMed:20396901};, KEGG:ath:AT5G07350,
599	10	2	2	2	2	2	Transcription factor MYB86;, KEGG:ath:AT5G26660,
600	10	2	2	2	2	2	F-box/kelch-repeat protein At5g60570;, KEGG:ath:AT5G60570,
601	5	1	1	1	1	1	Glutaredoxin-C4;, KEGG:ath:AT5G20500,
602	10	2	2	2	2	2	Iron-sulfur cluster assembly protein 1;, KEGG:ath:AT4G22220,
603	5	1	1	1	1	1	ATPase GET3B {ECO:0000305};, KEGG:ath:AT3G10350,
604	5	1	1	1	1	1	Dolichyl-diphosphooligosaccharide--protein glycosyltransferase subunit 1A;, KEGG:ath:AT1G76400,
605	5	1	1	1	1	1	Peptidyl-tRNA hydrolase, mitochondrial;, KEGG:ath:AT5G19830,
606	33	8	7	4	6	8	L-type lectin-domain containing receptor kinase IX.1 {ECO:0000303|PubMed:19773388};, KEGG:ath:AT5G10530,
607	10	2	2	2	2	2	Bax inhibitor 1;, KEGG:ath:AT5G47120,
608	5	1	1	1	1	1	Tuberculostearic acid methyltransferase UfaA1 {ECO:0000305};, KEGG:mtv:RVBD_0447c,KEGG:mtu:Rv0447c,
609	5	1	1	1	1	1	Adenylate isopentenyltransferase 3, chloroplastic;, KEGG:ath:AT3G63110,
610	9	2	2	1	2	2	Cyclin-U2-2;,Cyclin-U2-1;, KEGG:ath:AT2G45080,KEGG:ath:AT3G60550,
611	5	1	1	1	1	1	None
612	5	2	1	0	1	1	Trophinin;, KEGG:hsa:7216,
613	5	1	1	1	1	1	LMBR1 domain-containing protein 2 homolog A;, KEGG:ddi:DDB_G0284019,
614	12	3	3	2	2	2	Protein DETOXIFICATION 40 {ECO:0000303|PubMed:11739388};, KEGG:ath:AT3G21690,
615	5	1	1	1	1	1	Putative SNAP25 homologous protein SNAP30;, KEGG:ath:AT1G13890,
616	5	1	1	1	1	1	E3 ubiquitin-protein ligase RNF25 {ECO:0000305};, KEGG:dre:100003846,
617	5	1	1	0	1	2	Non-specific lipid-transfer protein 2;,
618	9	2	1	2	2	2	Isoflavone reductase homolog;,
619	12	2	2	2	4	2	Cucumisin {ECO:0000303|PubMed:7806492};, KEGG:cmo:103500253,
620	54	11	11	11	11	10	Serine/threonine-protein kinase SAPK2;,Serine/threonine-protein kinase SRK2B;,Serine/threonine-protein kinase SRK2A;,Serine/threonine-protein kinase SAPK10;,Serine/threonine-protein kinase SRK2E {ECO:0000303|PubMed:12514244};,Serine/threonine-protein kinase SRK2A {ECO:0000303|PubMed:27268428};,Serine/threonine-protein kinase SRK2I;,Serine/threonine-protein kinase SAPK7;,Serine/threonine-protein k…
621	5	1	1	1	1	1	Protein C2-DOMAIN ABA-RELATED 9 {ECO:0000303|PubMed:25465408};, KEGG:ath:AT1G70790,
622	5	1	1	1	1	1	Dolichyl pyrophosphate Glc1Man9GlcNAc2 alpha-1,3-glucosyltransferase {ECO:0000250|UniProtKB:P40351};, KEGG:ath:AT2G44660,
623	5	1	1	1	1	1	Beta-ureidopropionase {ECO:0000303|PubMed:11161056};, KEGG:ath:AT5G64370,
624	5	1	1	1	1	1	None
625	13	3	2	1	3	4	Heat shock cognate 70 kDa protein;,
626	5	1	1	1	1	1	Selenocysteine methyltransferase;, KEGG:ag:CAA10368,
627	14	3	3	1	2	5	Nuclear/nucleolar GTPase 2 {ECO:0000303|PubMed:21205822};,Nuclear/nucleolar GTPase 2 {ECO:0000305};, KEGG:ath:AT1G52980,KEGG:osa:4332852,
628	5	1	1	1	1	1	Chromatin-remodeling ATPase INO80 {ECO:0000303|PubMed:15525519};, KEGG:ath:AT3G57300,
629	5	1	1	1	1	1	Pentatricopeptide repeat-containing protein At1g11290, chloroplastic {ECO:0000305};, KEGG:ath:AT1G11290,
630	10	2	2	2	2	2	Adenosylhomocysteinase;, KEGG:nta:107786358,
631	5	1	1	1	1	1	Polycomb group protein VERNALIZATION 2;,Polycomb group protein EMF2B {ECO:0000305};, KEGG:osa:4346674,KEGG:ath:AT4G16845,
632	5	1	1	1	1	1	Dehydrogenase/reductase SDR family member 7 {ECO:0000303|PubMed:19027726};, KEGG:hsa:51635,
633	5	1	1	1	1	1	None
634	10	2	2	2	2	2	UNC93-like protein 2;, KEGG:ath:AT1G18010,KEGG:ath:AT1G18000,
635	10	2	2	2	2	2	LOB domain-containing protein 41;, KEGG:ath:AT3G02550,
636	10	2	2	2	2	2	Transcription factor BEE 3;,Transcription factor BEE 1;, KEGG:ath:AT1G73830,
637	5	1	1	1	1	1	Pleckstrin homology domain-containing protein 1;, KEGG:ath:AT2G29700,
638	5	1	1	1	1	1	Protein TRM32;, KEGG:ath:AT1G07620,
639	7	2	2	1	1	1	Probable enoyl-CoA hydratase 2, mitochondrial {ECO:0000305};, KEGG:ath:AT4G16800,
640	5	1	1	1	1	1	Ribonuclease inhibitor;,
641	5	1	1	1	1	1	None
642	5	1	1	1	1	1	Kinetochore protein NUF2 homolog {ECO:0000303|PubMed:29356153};, KEGG:ath:AT1G61000,
643	12	2	4	2	2	2	Diacylglycerol O-acyltransferase 2D {ECO:0000305};, KEGG:gmx:100784657,
644	33	7	4	7	9	6	Beta-glucosidase 11 {ECO:0000303|PubMed:15604686};,Beta-glucosidase 10 {ECO:0000303|PubMed:15604686};, KEGG:ath:AT4G27830,KEGG:ath:AT1G02850,
645	6	2	1	1	1	1	Transcription factor GTE8;, KEGG:ath:AT3G27260,
646	5	1	1	1	1	1	Uncharacterized WD repeat-containing protein C3H5.08c;, KEGG:spo:SPAC3H5.08c,
647	6	1	1	1	2	1	Geraniol 8-hydroxylase;, KEGG:ag:CAC80883,
648	2	1	1	0	0	0	None
649	5	1	1	0	1	2	Calmodulin binding protein PICBP {ECO:0000305};, KEGG:ath:AT5G04020,
650	18	3	3	4	5	3	Protein Brevis radix-like 4;,Protein Brevis radix-like 2;,Protein Brevis radix-like 3;, KEGG:ath:AT3G14000,KEGG:ath:AT5G20540,
651	5	1	1	1	1	1	Probable galactinol--sucrose galactosyltransferase 1;, KEGG:ath:AT1G55740,
652	5	1	1	1	1	1	UDP-glycosyltransferase 74B1;, KEGG:ath:AT1G24100,
653	8	1	1	2	2	2	Protein DOWN-REGULATED IN DIF1 11 {ECO:0000303|PubMed:17937500};, KEGG:ath:AT1G52970,
654	5	1	1	1	1	1	Sialyltransferase-like protein 2 {ECO:0000303|PubMed:24825296};, KEGG:ath:AT3G48820,
655	7	2	2	1	1	1	Light-harvesting complex-like protein OHP1, chloroplastic {ECO:0000305};, KEGG:ath:AT5G02120,
656	5	1	1	1	1	1	None
657	10	2	2	2	2	2	None
658	5	1	1	1	1	1	DNA-damage-repair/toleration protein DRT111, chloroplastic {ECO:0000303|PubMed:8479917};, KEGG:ath:AT1G30480,
659	5	1	1	1	1	1	None
660	10	2	2	2	2	2	Protein NPGR1 {ECO:0000303|PubMed:12928497};, KEGG:ath:AT1G27460,
661	10	2	2	2	2	2	Respiratory burst oxidase homolog protein C;, KEGG:sot:102598898,
662	10	2	2	2	2	2	Nuclear poly(A) polymerase 4 {ECO:0000303|PubMed:18479511};, KEGG:ath:AT4G32850,
663	10	2	2	2	2	2	Probable WRKY transcription factor 20;, KEGG:ath:AT4G26640,
664	3	1	1	0	0	1	None
665	10	2	2	2	2	2	Cyclin-dependent kinase C-2;,Cyclin-dependent kinase C-1;, KEGG:ath:AT5G10270,
666	5	1	1	1	1	1	Splicing factor 3B subunit 1;, KEGG:xla:399336,
667	5	1	1	1	1	1	ACT domain-containing protein ACR2 {ECO:0000305};, KEGG:ath:AT5G25320,
668	5	1	1	1	1	1	Protein DETOXIFICATION 29 {ECO:0000303|PubMed:11739388};,Protein DETOXIFICATION 31 {ECO:0000303|PubMed:11739388};, KEGG:ath:AT3G26590,KEGG:ath:AT1G12950,
669	5	1	1	1	1	1	Protein STRUBBELIG-RECEPTOR FAMILY 8;, KEGG:ath:AT4G22130,
670	4	1	0	1	1	1	Putative F-box/FBD/LRR-repeat protein At1g78760;,FBD-associated F-box protein At1g66310;, KEGG:ath:AT1G66310,KEGG:ath:AT1G78760,
671	5	1	1	1	1	1	Acetylornithine deacetylase;, KEGG:ath:AT4G17830,
672	5	1	1	1	1	1	Hypothetical protein At1g04090;, KEGG:ath:AT1G04090,
673	10	2	2	2	2	2	Transcription factor MYB48;,Transcription factor MYB59;, KEGG:ath:AT5G59780,KEGG:ath:AT3G46130,
674	5	1	1	1	1	1	None
675	5	1	1	1	1	1	Benzyl alcohol O-benzoyltransferase;, KEGG:nta:107814928,
676	12	3	2	2	2	3	LRR receptor kinase BAK1 {ECO:0000305};,Disease resistance protein BAK6 {ECO:0000305};,Leucine-rich repeat protein 1 {ECO:0000303|PubMed:19712067};,Leucine-rich repeat protein 2 {ECO:0000305};, KEGG:zma:103648015,KEGG:ath:AT3G43740,KEGG:osa:4344785,KEGG:ath:AT5G21090,
677	5	1	1	1	1	1	None
678	5	1	1	1	1	1	Cell division cycle-associated 7-like protein;, KEGG:mmu:217946,
679	5	1	1	1	1	1	Probable transcription factor At5g61620 {ECO:0000305};, KEGG:ath:AT5G61620,
680	46	18	0	7	9	12	Polyubiquitin 10;,Ubiquitin-ribosomal protein eS31 fusion protein {ECO:0000305};,Ubiquitin-NEDD8-like protein RUB2;,Polyubiquitin 3;,Polyubiquitin;,Polyubiquitin 11;,Polyubiquitin-A;,Ubiquitin-ribosomal protein eL40 fusion protein {ECO:0000305};,Ubiquitin-NEDD8-like protein RUB1;, KEGG:ath:AT4G05320,KEGG:ath:AT4G02890,KEGG:cel:CELE_F25B5.4,KEGG:ath:AT2G35635,KEGG:ath:AT5G03240,KEGG:osa:4341684,KE…
681	4	1	1	1	1	0	Auxin-responsive protein SAUR36 {ECO:0000305};, KEGG:ath:AT2G45210,
682	9	2	2	1	2	2	Solute carrier family 40 member 2;,Solute carrier family 40 member 1;, KEGG:ath:AT5G03570,KEGG:ath:AT2G38460,
683	15	3	3	3	3	3	Amino acid transporter AVT6A {ECO:0000305};, KEGG:ath:AT3G30390,
684	28	8	4	6	5	5	Uncharacterized protein ycf68;,
685	5	1	1	1	1	1	Protein LURP-one-related 14;, KEGG:ath:AT3G56180,
686	33	7	6	6	6	8	Probable disease resistance protein At1g61300;,Protein NRT1/ PTR FAMILY 7.1;,Probable disease resistance protein At4g27220;,Putative disease resistance protein At4g10780;,Disease resistance protein RPS5;, KEGG:ath:AT5G19640,KEGG:ath:AT4G10780,KEGG:ath:AT1G61300,KEGG:ath:AT4G27220,
687	5	1	1	1	1	1	WEB family protein At2g38370;, KEGG:ath:AT2G38370,
688	10	2	2	2	2	2	Arabinosyltransferase XEG113 {ECO:0000305};, KEGG:ath:AT2G35610,
689	19	4	2	5	4	4	Germin-like protein subfamily 3 member 3;,Auxin-binding protein ABP19a;,Auxin-binding protein ABP19b;,Germin-like protein 8-13;,Auxin-binding protein ABP20;, KEGG:pper:18770577,KEGG:ath:AT5G20630,KEGG:osa:9271637,
690	8	2	2	0	2	2	None
691	9	2	4	1	1	1	Esterase;,
692	5	1	1	1	1	1	Protein neuralized;, KEGG:dme:Dmel_CG11988,
693	5	1	1	1	1	1	Protein SEEDLING LETHAL 1, chloroplastic {ECO:0000303|PubMed:33391315};, KEGG:ath:AT2G36000,
694	15	3	3	3	3	3	Uncharacterized protein At5g39865;,Uncharacterized protein At3g28850;, KEGG:ath:AT5G39865,KEGG:ath:AT3G28850,
695	5	1	1	1	1	1	ACT domain-containing protein ACR1 {ECO:0000305};, KEGG:ath:AT5G65890,
696	5	1	1	1	1	1	Protein EIN6 ENHANCER {ECO:0000303|PubMed:31418686};, KEGG:ath:AT4G38495,
697	5	1	1	1	1	1	None
698	5	1	1	1	1	1	Oil body-associated protein 2B {ECO:0000303|PubMed:24406791};, KEGG:zma:100286341,
699	5	1	1	1	1	1	None
700	5	1	1	1	1	1	Growth-regulating factor 1;, KEGG:ath:AT2G22840,
701	8	2	2	1	1	2	Eukaryotic translation initiation factor 3 subunit A {ECO:0000255|HAMAP-Rule:MF_03000};, KEGG:xla:443632,
702	5	1	1	1	1	1	None
703	12	3	2	3	3	1	Probable E3 ubiquitin-protein ligase RHG1A {ECO:0000305};,E3 ubiquitin-protein ligase MBR2;, KEGG:ath:AT4G34040,
704	5	1	1	1	1	1	Post-GPI attachment to proteins factor 3;, KEGG:xtr:779696,
705	5	1	1	1	1	1	Peroxisomal fatty acid beta-oxidation multifunctional protein AIM1 {ECO:0000305};, KEGG:ath:AT4G29010,
706	5	1	1	1	1	1	Type I inositol polyphosphate 5-phosphatase 5 {ECO:0000305};, KEGG:ath:AT5G65090,
707	7	2	1	1	1	2	None
708	10	2	2	2	2	2	Nudix hydrolase 18, mitochondrial;,Nudix hydrolase 17, mitochondrial;, KEGG:ath:AT2G01670,KEGG:ath:AT1G14860,
709	2	1	1	0	0	0	None
710	5	1	1	1	1	1	None
711	5	1	1	1	1	1	Transcription factor MYB93 {ECO:0000303|PubMed:11597504};,Transcription factor MYB39;, KEGG:ath:AT4G17785,
712	4	1	0	1	1	1	Protein NEOXANTHIN-DEFICIENT 1 {ECO:0000303|PubMed:24506237};, KEGG:sly:101248551,
713	4	1	1	1	0	1	Heavy metal-associated isoprenylated plant protein 39 {ECO:0000303|PubMed:21072340, ECO:0000303|PubMed:23368984};, KEGG:ath:AT1G01490,
714	10	2	2	2	2	2	Putative pumilio homolog 7, chloroplastic;, KEGG:ath:AT1G78160,
715	5	1	1	1	1	1	Alpha-soluble NSF attachment protein;, KEGG:vvi:100232837,
716	15	3	3	3	3	3	MYB-like transcription factor EOBII {ECO:0000303|PubMed:20543029};,
717	9	2	2	1	2	2	Dihydroorotase, mitochondrial;, KEGG:ath:AT4G22930,
718	5	1	1	1	1	1	Putative glycerol-3-phosphate transporter 5;, KEGG:ath:AT2G13100,
719	5	1	1	1	1	1	Mitogen-activated protein kinase kinase kinase YODA {ECO:0000303|PubMed:14718171};, KEGG:ath:AT1G63700,
720	5	1	1	1	1	1	Heterogeneous nuclear ribonucleoprotein Q {ECO:0000305};, KEGG:ath:AT4G00830,
721	5	1	1	1	1	1	Mannan endo-1,4-beta-mannosidase 7;, KEGG:ath:AT5G66460,
722	10	2	2	2	2	2	Mediator of RNA polymerase II transcription subunit 12;, KEGG:ath:AT4G00450,
723	5	1	1	1	1	1	None
724	25	5	5	5	5	5	Pectate lyase;,Probable pectate lyase 22;,Putative pectate lyase 11;,Probable pectate lyase 5;, KEGG:ath:AT1G67750,KEGG:ath:AT5G63180,KEGG:ath:AT3G27400,
725	5	1	1	1	1	1	None
726	10	2	2	2	2	2	Subtilisin-like serine-protease S {ECO:0000303|PubMed:15980262};,
727	10	1	2	2	2	3	SNF1-related protein kinase catalytic subunit alpha KIN10 {ECO:0000305};, KEGG:ath:AT3G01090,
728	10	2	2	2	2	2	Mitochondrial carnitine/acylcarnitine carrier-like protein;, KEGG:ath:AT5G46800,
729	25	5	5	5	5	5	Soluble inorganic pyrophosphatase 1 {ECO:0000303|PubMed:15135060};,Soluble inorganic pyrophosphatase 4 {ECO:0000303|PubMed:15135060};,Soluble inorganic pyrophosphatase 3 {ECO:0000303|PubMed:15135060};, KEGG:ath:AT1G01050,KEGG:ath:AT3G53620,KEGG:ath:AT2G46860,
730	13	3	2	2	3	3	Probable aspartic proteinase GIP2 {ECO:0000305};,
731	8	1	2	1	3	1	Polypyrimidine tract-binding protein homolog 1;, KEGG:ath:AT3G01150,
732	5	1	1	1	1	1	Protein NCA1 {ECO:0000303|PubMed:24285797};, KEGG:ath:AT3G54360,
733	10	2	2	2	2	2	Lysophospholipid acyltransferase LPEAT1 {ECO:0000303|PubMed:19445718};, KEGG:ath:AT1G80950,
734	5	1	1	1	1	1	Fasciclin-like arabinogalactan protein 11;, KEGG:ath:AT5G03170,
735	5	1	1	1	1	1	Probable CoA ligase CCL5 {ECO:0000305|PubMed:23300257};,Peroxisomal OPC-8:0-CoA ligase 1 {ECO:0000303|PubMed:18267944, ECO:0000303|PubMed:19704801};, KEGG:ath:AT1G20510,
736	9	1	1	2	2	3	Probable leucine-rich repeat receptor-like serine/threonine-protein kinase At3g14840;, KEGG:ath:AT3G14840,
737	5	1	1	1	1	1	tRNA (adenine(37)-N6)-methyltransferase;, KEGG:mmu:74753,
738	5	1	1	1	1	1	Protein PAM71, chloroplastic {ECO:0000303|PubMed:27020959};, KEGG:ath:AT1G64150,
739	5	1	1	1	1	1	None
740	11	2	2	2	2	3	Pectin acetylesterase 10 {ECO:0000303|PubMed:25115560};,Pectin acetylesterase 12 {ECO:0000303|PubMed:25115560};, KEGG:ath:AT5G26670,KEGG:ath:AT3G05910,
741	10	2	2	2	2	2	None
742	9	2	1	1	3	2	None
743	13	5	3	1	2	2	Probable disease resistance protein At4g27220;,Disease resistance protein At4g27190;, KEGG:ath:AT4G27190,KEGG:ath:AT4G27220,
744	10	2	2	2	2	2	ATP-citrate synthase beta chain protein 1;, KEGG:osa:4325777,
745	5	1	1	1	1	1	Conserved oligomeric Golgi complex subunit 2 {ECO:0000303|PubMed:27448097};, KEGG:ath:AT4G24840,
746	20	4	4	4	4	4	Omega-3 fatty acid desaturase, chloroplastic;,Omega-3 fatty acid desaturase, endoplasmic reticulum;, KEGG:vra:106775023,
747	5	1	1	1	1	1	None
748	5	1	1	1	1	1	None
749	20	4	4	4	4	4	Protein RGF1 INDUCIBLE TRANSCRIPTION FACTOR 1 {ECO:0000303|PubMed:31801996};, KEGG:ath:AT2G12646,
750	21	5	4	4	4	4	Casein kinase 1-like protein 2 {ECO:0000305};,Casein kinase 1-like protein 1 {ECO:0000305};, KEGG:ath:AT4G26100,KEGG:ath:AT1G72710,
751	5	1	1	1	1	1	General transcription and DNA repair factor IIH subunit TFB2 {ECO:0000305};, KEGG:ath:AT4G17020,
752	5	1	1	1	1	1	Pentatricopeptide repeat-containing protein At3g59040;, KEGG:ath:AT3G59040,
753	5	1	1	1	1	1	E3 ubiquitin-protein ligase WAV3 {ECO:0000305};, KEGG:ath:AT5G49665,
754	5	1	1	1	1	1	Transcription factor bHLH87;, KEGG:ath:AT3G21330,
755	5	1	1	1	1	1	E3 ubiquitin-protein ligase AIP2;, KEGG:ath:AT5G20910,
756	5	1	1	1	1	1	Receptor-like protein 51 {ECO:0000303|PubMed:18434605};, KEGG:ath:AT4G18760,
757	5	1	1	1	1	1	Autophagy-related protein 13b {ECO:0000303|PubMed:12114572};, KEGG:ath:AT3G18770,
758	8	2	2	1	1	2	Cytochrome c oxidase subunit 5b-2, mitochondrial;, KEGG:ath:AT1G80230,
759	5	1	1	1	1	1	WRKY transcription factor 72A {ECO:0000305};, KEGG:sly:100529138,
760	16	3	2	1	4	6	S-protein homolog 2 {ECO:0000303|PubMed:10344198};,S-protein homolog 3 {ECO:0000303|PubMed:10344198};,S-protein homolog 4 {ECO:0000303|PubMed:10344198};, KEGG:ath:AT5G12070,KEGG:ath:AT5G12060,KEGG:ath:AT4G16195,
761	3	1	1	0	0	1	Protein OSB2, chloroplastic;, KEGG:ath:AT4G20010,
762	5	1	1	1	1	1	Bet1-like protein At4g14600;, KEGG:ath:AT4G14600,
763	5	1	1	1	1	1	None
764	5	1	1	1	1	1	Katanin p60 ATPase-containing subunit A-like 2 {ECO:0000255|HAMAP-Rule:MF_03025};, KEGG:xtr:100036615,
765	5	1	1	1	1	1	65-kDa microtubule-associated protein 3;, KEGG:ath:AT5G51600,
766	5	1	1	1	1	1	Protein TIFY 5A {ECO:0000303|PubMed:17499004};, KEGG:ath:AT1G30135,
767	5	1	1	1	1	1	Ent-kaurene oxidase, chloroplastic;,Ent-kaurene oxidase {ECO:0000303|PubMed:26971881};, KEGG:ath:AT5G25900,
768	2	1	0	0	0	1	Probable purine permease 11;, KEGG:ath:AT1G44750,
769	5	1	1	1	1	1	None
770	4	1	1	0	1	1	Protein MKS1;, KEGG:ath:AT3G18690,
771	10	2	2	2	2	2	Protein BOBBER 1;, KEGG:ath:AT5G53400,
772	5	1	1	1	1	1	Pentatricopeptide repeat-containing protein At5g40410, mitochondrial;, KEGG:ath:AT5G40410,
773	2	2	0	0	0	0	None
774	9	2	1	2	2	2	Transcriptional corepressor SEUSS;, KEGG:ath:AT1G43850,
775	10	2	2	2	2	2	Uncharacterized sugar kinase slr0537;, KEGG:syn:slr0537,
776	15	4	2	3	3	3	None
777	5	1	1	1	1	1	Non-specific lipid transfer protein GPI-anchored 15 {ECO:0000303|PubMed:23893219};, KEGG:ath:AT2G48130,
778	5	1	1	1	1	1	Seipin-2 {ECO:0000303|PubMed:26362606};, KEGG:ath:AT1G29760,
779	4	1	1	0	1	1	Protein CTR9 homolog {ECO:0000305};, KEGG:ath:AT2G06210,
780	7	2	1	1	1	2	B2 protein;,Kelch-like protein 17;,Kelch-like protein 18;, KEGG:hsa:339451,KEGG:hsa:23276,
781	5	1	1	1	1	1	Uncharacterized protein At5g39865;,Uncharacterized protein At3g28850;, KEGG:ath:AT5G39865,KEGG:ath:AT3G28850,
782	4	2	2	0	0	0	None
783	10	2	2	2	2	2	Galactinol--sucrose galactosyltransferase;,
784	5	1	1	1	1	1	Nuclear pore complex protein NUP107 {ECO:0000303|PubMed:21189294};, KEGG:ath:AT3G14120,
785	10	2	2	2	2	2	V-type proton ATPase subunit B3;,V-type proton ATPase subunit B 1;,V-type proton ATPase subunit B2;, KEGG:ghi:107890851,KEGG:ath:AT1G20260,KEGG:ath:AT4G38510,
786	2	1	0	0	0	1	Probable phospholipid-transporting ATPase 8 {ECO:0000303|PubMed:11402198};, KEGG:ath:AT3G27870,
787	5	1	1	1	1	1	Acetyl-coenzyme A carboxylase carboxyl transferase subunit alpha, chloroplastic;, KEGG:ath:AT2G38040,
788	5	1	1	1	1	1	Uncharacterized protein At3g61260;, KEGG:ath:AT3G61260,
789	5	1	1	1	1	1	Uncharacterized sugar kinase slr0537;, KEGG:syn:slr0537,
790	5	1	1	1	1	1	LEC14B homolog;,
791	5	1	1	1	1	1	Release factor glutamine methyltransferase {ECO:0000255|HAMAP-Rule:MF_02126};, KEGG:syn:sll1237,
792	5	1	1	1	1	1	None
793	140	36	25	8	40	31	Putative disease resistance protein RGA1;,Putative disease resistance RPP13-like protein 1;, KEGG:ath:AT3G14470,
794	40	8	8	8	8	8	Cytokinin riboside 5'-monophosphate phosphoribohydrolase LOG1;,Cytokinin riboside 5'-monophosphate phosphoribohydrolase LOG3;,Cytokinin riboside 5'-monophosphate phosphoribohydrolase LOG7;, KEGG:ath:AT2G37210,KEGG:ath:AT2G28305,KEGG:ath:AT5G06300,
795	5	1	1	1	1	1	GDSL esterase/lipase At1g28600;, KEGG:ath:AT1G28600,
796	15	3	3	3	3	3	Phytoene synthase, chloroplastic;,
797	52	12	10	7	13	10	Probable disease resistance protein At5g63020;,Disease resistance protein UNI {ECO:0000305};,Probable disease resistance protein At4g27220;,Disease resistance protein At4g27190;, KEGG:ath:AT4G27190,KEGG:ath:AT4G27220,
798	5	1	1	1	1	1	Protein CHUP1, chloroplastic;, KEGG:ath:AT3G25690,
799	5	5	0	0	0	0	None
800	5	1	1	1	1	1	Squalene monooxygenase SE1 {ECO:0000303|Ref.1};,
801	7	1	1	2	2	1	U1 small nuclear ribonucleoprotein A;, KEGG:ath:AT2G47580,KEGG:osa:4337846,
802	5	1	1	1	1	1	Serine carboxypeptidase-like 26 {ECO:0000305};, KEGG:osa:4337873,
803	11	3	2	2	2	2	AP-1 complex subunit mu-2;, KEGG:ath:AT1G60780,
804	41	5	7	14	8	7	None
805	17	4	3	1	4	5	Receptor-like protein kinase FERONIA {ECO:0000303|PubMed:17673660};,Putative receptor-like protein kinase At5g39000;, KEGG:ath:AT3G51550,
806	16	5	7	1	1	2	Non-specific lipid transfer protein GPI-anchored 5 {ECO:0000303|PubMed:23893219};, KEGG:ath:AT3G22600,
807	5	1	1	1	1	1	NDR1/HIN1-like protein 13 {ECO:0000303|PubMed:26206852};, KEGG:ath:AT2G27080,
808	5	1	1	1	1	1	Reticulon-like protein B21;, KEGG:ath:AT5G58000,
809	9	2	2	1	2	2	None
810	14	3	3	1	3	4	Cytochrome P450 71D8;, KEGG:gmx:100780605,
811	5	1	1	1	1	1	None
812	5	1	1	1	1	1	None
813	10	2	2	2	2	2	Protein MANNAN SYNTHESIS-RELATED 1 {ECO:0000303|PubMed:22966747};,Protein MANNAN SYNTHESIS-RELATED 2 {ECO:0000303|PubMed:22966747};, KEGG:ath:AT3G21190,KEGG:ath:AT1G51630,
814	10	2	2	2	2	2	Root phototropism protein 3;,Coleoptile phototropism protein 1;, KEGG:ath:AT5G64330,KEGG:osa:4329720,
815	14	3	3	2	3	3	Probable copper-transporting ATPase HMA5;, KEGG:ath:AT1G63440,
816	9	3	2	1	1	2	Galactoside 2-alpha-L-fucosyltransferase;, KEGG:ath:AT2G03220,
817	5	1	1	1	1	1	E3 ubiquitin-protein ligase TRIM65;, KEGG:hsa:201292,
818	5	1	1	1	1	1	Obg-like ATPase 1 {ECO:0000255|HAMAP-Rule:MF_03167};, KEGG:ath:AT1G30580,
819	9	1	0	3	4	1	Ethylene-responsive transcription factor ERF118;, KEGG:ath:AT1G68550,
820	5	1	1	1	1	1	Probable protein phosphatase 2C 26;, KEGG:ath:AT2G30170,
821	6	2	1	1	1	1	Cleavage stimulation factor subunit 77 {ECO:0000303|PubMed:12379796};, KEGG:ath:AT1G17760,
822	5	1	1	1	1	1	Cycloeucalenol cycloisomerase;, KEGG:ath:AT5G50375,
823	22	6	5	3	3	5	Sugar transport protein MST3 {ECO:0000305};,Sugar transport protein 1;, KEGG:ath:AT1G11260,KEGG:osa:4342198,
824	15	3	3	3	3	3	Serine/threonine-protein kinase WNK1;, KEGG:ath:AT3G04910,
825	15	3	3	3	3	3	Probable methyltransferase PMT20;, KEGG:ath:AT1G31850,
826	10	2	2	2	2	2	WAT1-related protein At1g70260;, KEGG:ath:AT1G70260,
827	2	2	0	0	0	0	None
828	5	1	1	1	1	1	None
829	9	2	2	1	2	2	None
830	5	1	1	1	1	1	Respiratory burst oxidase homolog protein F;, KEGG:ath:AT1G64060,
831	6	1	1	1	1	2	ABC transporter B family member 15;,ABC transporter B family member 18;, KEGG:ath:AT3G28390,KEGG:ath:AT3G28345,
832	11	2	2	2	2	3	Probable 6-phosphogluconolactonase 4, chloroplastic;,6-phosphogluconolactonase 3, chloroplastic {ECO:0000305};, KEGG:osa:4347654,KEGG:ath:AT5G24400,
833	5	1	1	1	1	1	Filament-like plant protein 3 {ECO:0000303|PubMed:11972898};,Filament-like plant protein;, KEGG:ath:AT3G05270,
834	5	1	1	1	1	1	None
835	5	1	1	1	1	1	BTB/POZ domain-containing protein At3g56230;, KEGG:ath:AT3G56230,
836	14	3	3	3	2	3	NADPH-dependent aldehyde reductase 1, chloroplastic {ECO:0000303|PubMed:21169366};,Glucose and ribitol dehydrogenase;, KEGG:ath:AT1G54870,
837	5	1	1	1	1	1	Pentatricopeptide repeat-containing protein At4g04790, mitochondrial;, KEGG:ath:AT4G04790,
838	10	2	2	2	2	2	Probable splicing factor YJU2B {ECO:0000305};, KEGG:bta:614791,
839	10	2	2	2	2	2	Inositol hexakisphosphate and diphosphoinositol-pentakisphosphate kinase VIP2 {ECO:0000303|PubMed:25231822};, KEGG:ath:AT5G15070,
840	5	1	1	1	1	1	Probable receptor-like protein kinase At5g18500;, KEGG:ath:AT5G18500,
841	26	7	5	4	5	5	Zeatin O-glucosyltransferase {ECO:0000303|PubMed:9874810};,Zeatin O-xylosyltransferase {ECO:0000303|PubMed:10364407};, KEGG:ag:AAD04166,KEGG:pvu:PHAVU_007G251000g,
842	15	3	3	3	3	3	Leucine-rich repeat receptor-like serine/threonine-protein kinase BAM1;, KEGG:ath:AT5G65700,
843	5	1	1	1	1	1	None
844	10	2	2	2	2	2	Lysine-specific demethylase JMJ29 {ECO:0000303|PubMed:18713399};,Lysine-specific demethylase JMJ26 {ECO:0000303|PubMed:18713399};,Lysine-specific demethylase JMJ27 {ECO:0000303|PubMed:18713399};,Lysine-specific demethylase JMJ25 {ECO:0000303|PubMed:18713399};, KEGG:ath:AT4G00990,KEGG:ath:AT1G62310,KEGG:ath:AT1G11950,KEGG:ath:AT3G07610,
845	20	6	4	3	4	3	UDP-glucuronic acid decarboxylase 5;,UDP-glucuronic acid decarboxylase 6;, KEGG:ath:AT3G46440,KEGG:ath:AT2G28760,
846	5	1	1	1	1	1	Sodium/calcium exchanger NCL1 {ECO:0000305};, KEGG:osa:4325568,
847	6	2	1	1	1	1	Very-long-chain 3-oxoacyl-CoA reductase-like protein At1g24470;, KEGG:ath:AT1G24470,
848	11	3	2	2	2	2	TNF receptor-associated factor homolog 1b {ECO:0000305};, KEGG:ath:AT1G04300,
849	12	3	2	2	3	2	Phosphate transporter PHO1 homolog 3;, KEGG:ath:AT1G14040,
850	5	1	1	1	1	1	Bifunctional TH2 protein, mitochondrial {ECO:0000303|PubMed:27677881};, KEGG:ath:AT5G32470,
851	5	1	1	1	1	1	Transcription factor MYB73 {ECO:0000303|PubMed:11597504};, KEGG:ath:AT4G37260,
852	10	2	2	2	2	2	Metal-nicotianamine transporter YSL3;, KEGG:ath:AT5G53550,
853	5	1	1	1	1	1	Medium-chain-fatty-acid--[acyl-carrier-protein] ligase JamA {ECO:0000305};, KEGG:ag:AAS98774,
854	4	2	1	0	0	1	Proliferating cell nuclear antigen;,
855	5	1	1	1	1	1	TLD domain-containing protein 2;,Oxidation resistance protein 1;, KEGG:xtr:100127645,KEGG:hsa:55074,
856	5	1	1	1	1	1	Sec-independent protein translocase protein TATC, chloroplastic;,
857	5	1	1	1	1	1	Probable glycosyltransferase At5g20260;, KEGG:ath:AT5G20260,
858	5	1	1	1	1	1	Deoxycytidine kinase;, KEGG:hsa:1633,
859	5	1	1	1	1	1	None
860	10	2	2	2	2	2	Ankyrin repeat-containing protein At5g02620;, KEGG:ath:AT5G02620,
861	5	1	1	1	1	1	F-box/kelch-repeat protein At1g57790;, KEGG:ath:AT1G57790,
862	5	1	1	1	1	1	None
863	8	2	3	0	1	2	UDP-glycosyltransferase 79B30 {ECO:0000303|PubMed:26002063};,
864	9	2	1	2	2	2	Protein neprosin {ECO:0000303|PubMed:27481162};,
865	5	1	1	1	1	1	Xyloglucan endotransglucosylase/hydrolase protein 31 {ECO:0000303|PubMed:12514239};,Xyloglucan endotransglucosylase/hydrolase protein 4;, KEGG:ath:AT2G06850,
866	5	1	1	1	1	1	Ethylene-responsive transcription factor 12;, KEGG:ath:AT1G28360,
867	26	5	5	5	5	6	Probable auxin efflux carrier component 1c {ECO:0000305};,Auxin efflux carrier component 3 {ECO:0000303|PubMed:11845211};,Auxin efflux carrier component 1 {ECO:0000303|PubMed:9856939};,Auxin efflux carrier component 1a {ECO:0000305};, KEGG:ath:AT1G70940,KEGG:ath:AT1G73590,KEGG:osa:4340580,KEGG:osa:4330700,
868	2	1	1	0	0	0	None
869	7	1	1	2	2	1	Structure-specific endonuclease subunit slx1 {ECO:0000255|HAMAP-Rule:MF_03100, ECO:0000303|PubMed:14528010, ECO:0000312|EMBL:CAB76036.1};, KEGG:spo:SPAP27G11.15,
870	87	33	42	4	4	4	Armadillo repeat-containing protein LFR {ECO:0000305};,Uncharacterized protein YqkD;,Regulator of nonsense transcripts 1 homolog;, KEGG:ath:AT5G47010,KEGG:osa:9271563,KEGG:bsu:BSU23640,
871	2	2	0	0	0	0	None
872	5	1	1	1	1	1	Fatty-acid-binding protein 1;, KEGG:ath:AT3G63170,
873	10	2	2	2	2	2	Pentatricopeptide repeat-containing protein At5g15010, mitochondrial;, KEGG:ath:AT5G15010,
874	5	1	1	1	1	1	Caffeoylshikimate esterase;, KEGG:ath:AT1G52760,
875	5	1	1	1	1	1	Sulfate transporter 4.1, chloroplastic;, KEGG:ath:AT5G13550,
876	19	4	4	3	4	4	L-ascorbate oxidase homolog;, KEGG:bna:106452325,
877	5	1	1	1	1	1	Proteasome subunit alpha type-7;, KEGG:cam:101498666,
878	10	2	2	2	2	2	Potassium channel KAT1;,Potassium channel KAT2;, KEGG:ath:AT5G46240,KEGG:ath:AT4G18290,
879	5	1	1	1	1	1	Cytochrome b5;, KEGG:nta:107781159,KEGG:nta:107816859,
880	224	35	60	23	69	37	Auxin-induced protein 6B;,Senescence-specific cysteine protease SAG39 {ECO:0000305};,Cysteine proteinase COT44;,Auxin-induced protein 10A5;,Indole-3-acetic acid-induced protein ARG7;,Auxin-induced protein X10A;,Auxin-induced protein 15A;, KEGG:gmx:100775873,KEGG:osa:107276017,KEGG:gmx:100817568,KEGG:gmx:106798973,
881	8	2	2	1	2	1	Protein LOL1;,Protein LSD1;, KEGG:ath:AT1G32540,KEGG:ath:AT4G20380,
882	5	1	1	1	1	1	None
883	6	1	2	1	1	1	Histone-lysine N-methyltransferase TRX1 {ECO:0000305};, KEGG:osa:4346464,
884	15	3	3	3	3	3	Phosphatidylinositol 4-phosphate 5-kinase 1;,MORN repeat-containing protein 4;,Radial spoke head 1 homolog;,Phosphatidylinositol 4-phosphate 5-kinase 8;, KEGG:ath:AT1G60890,KEGG:mmu:22092,KEGG:ath:AT1G21980,
885	27	7	6	2	6	6	Ankyrin repeat-containing protein ITN1;,Ankyrin repeat-containing protein At5g02620;, KEGG:ath:AT3G12360,KEGG:ath:AT5G02620,
886	5	1	1	1	1	1	Cysteine-rich receptor-like protein kinase 10;,Cysteine-rich receptor-like protein kinase 8;,Cysteine-rich receptor-like protein kinase 25;, KEGG:ath:AT4G05200,
887	5	1	1	1	1	1	None
888	20	4	4	4	4	4	Ras-related protein Rab7;, KEGG:gmx:100785104,
889	5	1	1	1	1	1	Prefoldin subunit 1 {ECO:0000303|PubMed:19825635};, KEGG:ath:AT2G07340,
890	10	2	2	2	2	2	Plant cysteine oxidase 4 {ECO:0000303|PubMed:24599061};, KEGG:ath:AT2G42670,
891	159	5	5	133	11	5	Leghemoglobin alpha {ECO:0000303|PubMed:809270};,Putative ribonuclease H protein At1g65750;,Leghemoglobin 4 {ECO:0000303|PubMed:32297921};, KEGG:gmx:100527379,KEGG:pvu:PHAVU_007G141900g,KEGG:pvu:PHAVU_007G142600g,KEGG:pvu:PHAVU_007G142500g,
892	5	1	1	1	1	1	Pheophytinase, chloroplastic;, KEGG:ath:AT5G13800,
893	6	1	2	1	1	1	Coiled-coil domain-containing protein 124-A;, KEGG:xla:447348,
894	10	2	2	2	2	2	Bromodomain and PHD finger-containing protein 3 {ECO:0000303|PubMed:26620551};,Bromodomain and PHD finger-containing protein 3 {ECO:0000303|PubMed:26677226};, KEGG:mmu:268936,KEGG:hsa:27154,
895	23	10	7	1	1	4	Endochitinase CH5B;,Endochitinase;, KEGG:pvu:PHAVU_009G116600g,
896	9	2	2	2	1	2	Transcription factor PIF1 {ECO:0000303|PubMed:15448264};, KEGG:ath:AT2G20180,
897	2	1	0	0	0	1	None
898	10	2	2	2	2	2	Protein trichome birefringence-like 16;, KEGG:ath:AT5G20680,
899	5	1	1	1	1	1	Peroxisomal membrane protein PMP22;, KEGG:ath:AT4G04470,
900	14	2	3	3	3	3	Uclacyanin 1 {ECO:0000303|PubMed:9761472};,Superoxide dismutase [Fe] 2, chloroplastic;,Superoxide dismutase [Fe], chloroplastic;, KEGG:gmx:547823,KEGG:ath:AT5G51100,KEGG:ath:AT2G32300,
901	10	2	2	2	2	2	Stomatal closure-related actin-binding protein 1 {ECO:0000303|PubMed:21719691};, KEGG:ath:AT2G26770,
902	8	2	2	1	1	2	Calnexin homolog;, KEGG:gmx:547851,
903	5	1	1	1	1	1	Lysosomal Pro-X carboxypeptidase;, KEGG:pon:100172335,
904	5	1	1	1	1	1	None
905	3	1	1	0	0	1	None
906	5	1	1	1	1	1	Transcription factor bHLH162;, KEGG:ath:AT4G20970,
907	5	1	1	1	1	1	GDT1-like protein 4;, KEGG:ath:AT1G25520,
908	5	1	1	1	1	1	Protein FLOWERING LOCUS D {ECO:0000303|PubMed:14593187, ECO:0000303|PubMed:15911588, ECO:0000303|PubMed:17996704};, KEGG:ath:AT3G10390,
909	11	2	2	1	1	5	Disease resistance-like protein DSC1 {ECO:0000305};,Disease resistance protein RPV1 {ECO:0000305};,Disease resistance protein RML1A {ECO:0000305};, KEGG:ath:AT4G12010,KEGG:ath:AT1G64070,
910	12	4	2	0	2	4	Endo-1,3;,
911	7	2	0	1	2	2	(+)-borneol dehydrogenase 2 {ECO:0000303|PubMed:31927319};,
912	5	1	1	1	1	1	Protein SIEVE ELEMENT OCCLUSION B {ECO:0000303|PubMed:20932300};, KEGG:ath:AT3G01680,
913	9	2	2	1	2	2	Protein SPIRAL1-like 1;,Protein SPIRAL1-like 2;, KEGG:ath:AT1G26355,KEGG:ath:AT1G69230,
914	5	1	1	1	1	1	Plasmodesmata-located protein 7;, KEGG:ath:AT5G37660,
915	87	25	3	29	26	4	Replication protein A 70 kDa DNA-binding subunit C;, KEGG:osa:4337594,
916	4	1	1	0	1	1	None
917	5	1	1	1	1	1	Nudix hydrolase 14, chloroplastic;, KEGG:ath:AT4G11980,
918	10	2	2	2	2	2	Myb-related protein 305;,Transcription factor MYB48;,Transcription factor MYB2 {ECO:0000305};, KEGG:ath:AT3G46130,KEGG:osa:4332651,
919	15	3	3	3	3	3	ATP-citrate synthase alpha chain protein 3;,ATP-citrate synthase alpha chain protein 1;,ATP-citrate synthase alpha chain protein 2;, KEGG:ath:AT1G10670,KEGG:osa:4352549,KEGG:ath:AT1G60810,
920	10	2	2	2	2	2	IQ domain-containing protein IQM5 {ECO:0000305};,IQ domain-containing protein IQM1 {ECO:0000305};, KEGG:ath:AT4G33050,KEGG:ath:AT5G57010,
921	3	3	0	0	0	0	None
922	14	2	3	3	3	3	Bidirectional sugar transporter SWEET10 {ECO:0000303|PubMed:21107422};,Bidirectional sugar transporter SWEET13;,Bidirectional sugar transporter SWEET14;,Bidirectional sugar transporter SWEET13 {ECO:0000303|PubMed:21107422};, KEGG:osa:4352201,KEGG:ath:AT5G50790,KEGG:ath:AT5G50800,
923	10	2	2	2	2	2	Expansin-like B1;, KEGG:ath:AT4G17030,
924	5	1	1	1	1	1	5'-deoxynucleotidase HDDC2;, KEGG:dre:554129,
925	5	1	1	1	1	1	RNA-binding protein with multiple splicing 2;,Cell wall integrity protein scw1;, KEGG:mmu:71973,
926	10	2	2	2	2	2	Ethylene-responsive transcription factor ERF034;, KEGG:ath:AT2G44940,
927	10	2	2	2	2	2	Copper transporter 6;,Copper transporter 2;, KEGG:ath:AT2G26975,
928	10	2	2	2	2	2	Magnesium-chelatase subunit ChlH, chloroplastic;, KEGG:ath:AT5G13630,
929	5	1	1	1	1	1	Homeobox protein LUMINIDEPENDENS;, KEGG:ath:AT4G02560,
930	5	1	1	1	1	1	Probable NAD(P)H-dependent oxidoreductase 1;, KEGG:osa:4347977,
931	26	5	5	5	6	5	Serine/threonine-protein kinase PBS1 {ECO:0000303|PubMed:11359614};,Probable serine/threonine-protein kinase PBL7 {ECO:0000305};,Serine/threonine-protein kinase PBL27 {ECO:0000303|PubMed:20413097};, KEGG:ath:AT5G18610,KEGG:ath:AT5G13160,KEGG:ath:AT5G02800,
932	5	1	1	1	1	1	Lecithin-cholesterol acyltransferase-like 4;, KEGG:ath:AT4G19860,
933	5	1	1	1	1	1	Zinc finger CCCH domain-containing protein 18;, KEGG:osa:4330984,
934	10	2	2	2	2	2	Probable aquaporin TIP-type alpha;,
935	5	1	1	1	1	1	DNA-directed RNA polymerase IV subunit 1;, KEGG:ath:AT1G63020,
936	13	2	2	3	3	3	Wall-associated receptor kinase-like 2;, KEGG:ath:AT1G16130,
937	5	1	1	1	1	1	Transcription factor bHLH162;, KEGG:ath:AT4G20970,
938	10	2	2	2	2	2	Calcium-transporting ATPase 4, endoplasmic reticulum-type;,Calcium-transporting ATPase, endoplasmic reticulum-type;, KEGG:ath:AT1G07670,KEGG:sly:543554,
939	5	1	1	1	1	1	Protein IQ-DOMAIN 10 {ECO:0000303|PubMed:16368012};, KEGG:ath:AT3G15050,
940	10	2	2	2	2	2	BEL1-like homeodomain protein 1;, KEGG:ath:AT2G35940,
941	6	1	1	1	1	2	Early nodulin-like protein 6 {ECO:0000303|PubMed:19897921};,Piriformospora indica-insensitive protein 2;, KEGG:ath:AT1G13230,KEGG:ath:AT1G48940,
942	10	2	2	2	2	2	Probable protein phosphatase 2C 35;, KEGG:ath:AT3G06270,
943	28	13	8	2	3	2	Protein ENHANCED DISEASE RESISTANCE 4 {ECO:0000303|PubMed:25747881};,DEAD-box ATP-dependent RNA helicase FANCM {ECO:0000305};, KEGG:ath:AT1G35530,KEGG:ath:AT5G05190,
944	10	2	2	2	2	2	ABC transporter G family member 22;, KEGG:ath:AT5G06530,
945	5	1	1	1	1	1	Uncharacterized GPI-anchored protein At3g06035;, KEGG:ath:AT3G06035,
946	9	2	2	1	2	2	Calcium-dependent protein kinase 17;, KEGG:ath:AT5G12180,
947	5	1	1	1	1	1	Receptor-like serine/threonine-protein kinase ALE2;, KEGG:ath:AT2G20300,
948	7	4	1	0	1	1	Pectin acetylesterase 5 {ECO:0000303|PubMed:25115560};, KEGG:ath:AT3G09410,
949	5	1	1	1	1	1	Protein PHYTOCHROME KINASE SUBSTRATE 4;, KEGG:ath:AT5G04190,
950	5	1	1	1	1	1	None
951	15	2	1	2	8	2	Receptor-like protein EIX2 {ECO:0000305};,Receptor-like protein EIX1 {ECO:0000305};, KEGG:sly:543900,KEGG:sly:101263330,
952	5	1	1	1	1	1	AP2-like ethylene-responsive transcription factor PLT2 {ECO:0000303|PubMed:15454085};, KEGG:ath:AT1G51190,
953	5	1	1	1	1	1	None
954	5	1	1	1	1	1	Bidirectional sugar transporter N3;,
955	10	2	2	2	2	2	Golgin candidate 4;,Golgin candidate 3;, KEGG:ath:AT2G46180,KEGG:ath:AT3G61570,
956	10	2	2	2	2	2	GDP-mannose 3,5-epimerase 1;, KEGG:osa:4348636,
957	18	4	3	4	4	3	Probable protein phosphatase 2C 10;, KEGG:ath:AT1G34750,
958	117	27	22	12	25	31	Rust resistance kinase Lr10 {ECO:0000312|EMBL:AAC49629.1};,LEAF RUST 10 DISEASE-RESISTANCE LOCUS RECEPTOR-LIKE PROTEIN KINASE-like 2.1 {ECO:0000303|PubMed:12805585};, KEGG:ath:AT5G38260,
959	5	1	1	1	1	1	Transcription factor EGL1;,Transcription factor GLABRA 3;, KEGG:ath:AT1G63650,KEGG:ath:AT5G41315,
960	5	1	1	1	1	1	Probable beta-1,4-xylosyltransferase IRX9H;, KEGG:ath:AT1G27600,
961	12	2	1	1	6	2	Putative exosome complex component rrp40;, KEGG:ddi:DDB_G0276783,
962	5	1	1	1	1	1	Eukaryotic translation initiation factor 5B;, KEGG:spo:SPAC56F8.03,
963	14	1	2	3	4	4	Probable poly(ADP-ribose) glycohydrolase 2;,Poly(ADP-ribose) glycohydrolase 1;, KEGG:ath:AT2G31865,KEGG:ath:AT2G31870,
964	10	2	2	2	2	2	Thylakoid ADP,ATP carrier protein, chloroplastic;,Probable envelope ADP,ATP carrier protein, chloroplastic;, KEGG:ath:AT3G51870,KEGG:ath:AT5G01500,
965	57	14	12	4	11	16	Putative disease resistance protein RGA1;,Disease resistance protein RGA2;,Putative disease resistance protein RGA4;,Putative disease resistance protein RGA3;,
966	9	1	2	2	2	2	eEF1A lysine and N-terminal methyltransferase {ECO:0000250|UniProtKB:Q8N6R0};, KEGG:bta:538472,
967	5	1	1	1	1	1	Protein REDUCED CHLOROPLAST COVERAGE 2 {ECO:0000303|PubMed:26862170};, KEGG:ath:AT4G28080,
968	5	1	1	1	1	1	Serine/threonine-protein kinase D6PKL2;, KEGG:ath:AT5G47750,
969	14	3	2	4	2	3	Glutathione S-transferase F9 {ECO:0000303|PubMed:12090627};, KEGG:ath:AT2G30860,
970	10	2	2	2	2	2	Cyclin-U4-1;, KEGG:ath:AT2G44740,
971	15	3	3	3	3	3	Probable fructokinase-7;,Probable fructokinase-6, chloroplastic;, KEGG:ath:AT5G51830,KEGG:ath:AT1G66430,
972	14	3	2	3	3	3	Beta-fructofuranosidase, cell wall isozyme;,
973	5	1	1	1	1	1	Transcription termination factor MTERF8, chloroplastic {ECO:0000305};,Transcription termination factor MTERF5, chloroplastic {ECO:0000305};, KEGG:ath:AT4G14605,
974	5	1	1	1	1	1	Probable GMP synthase [glutamine-hydrolyzing];, KEGG:hhe:HH_1444,
975	10	2	2	2	2	2	Transcription factor MYB61 {ECO:0000305};, KEGG:ath:AT1G09540,
976	17	3	5	2	3	4	Cyclin-C1-1;,Cyclin-C1-2;, KEGG:ath:AT5G48630,KEGG:osa:9272663,
977	5	1	1	1	1	1	None
978	5	1	1	1	1	1	Putative callose synthase 8;, KEGG:ath:AT3G14570,
979	5	1	1	1	1	1	Rho-N domain-containing protein 1, chloroplastic;, KEGG:ath:AT1G06190,
980	10	2	2	2	2	2	None
981	5	1	1	1	1	1	Probable WRKY transcription factor 32;, KEGG:ath:AT4G30935,
982	11	3	2	2	2	2	Probable inactive purple acid phosphatase 1;, KEGG:ath:AT1G13750,
983	19	4	3	4	4	4	CEN-like protein 1;,CEN-like protein 2;,Protein TERMINAL FLOWER 1;,Protein CENTRORADIALIS-like;, KEGG:ath:AT5G03840,KEGG:nta:107765880,KEGG:nta:107785846,KEGG:ath:AT2G27550,
984	5	1	1	1	1	1	GPI transamidase component PIG-T;, KEGG:hsa:51604,
985	3	1	1	0	0	1	Phosphatidyl-N-methylethanolamine N-methyltransferase {ECO:0000255|HAMAP-Rule:MF_03216};, KEGG:ath:AT1G80860,
986	17	2	2	2	2	9	Shikimate O-hydroxycinnamoyltransferase {ECO:0000303|PubMed:15161961};,Shikimate O-hydroxycinnamoyltransferase;, KEGG:nta:107796658,KEGG:ath:AT5G48930,
987	6	1	1	2	2	0	None
988	18	4	2	4	4	4	Lectin 10 {ECO:0000303|PubMed:16134889};,Lectin 7 {ECO:0000303|PubMed:16134889};, KEGG:mtr:11405785,KEGG:mtr:11430870,
989	10	2	2	2	2	2	Ubiquitin receptor RAD23d;,Ubiquitin receptor RAD23c {ECO:0000303|PubMed:20086187};, KEGG:ath:AT3G02540,
990	5	1	1	1	1	1	Glutamyl-tRNA reductase 1, chloroplastic;,Glutamyl-tRNA reductase 2, chloroplastic;, KEGG:csv:101220615,
991	15	2	3	3	4	3	Probable serine/threonine-protein kinase PBL17 {ECO:0000305};,Lupeol synthase;, KEGG:ag:BAD08587,KEGG:ath:AT2G07180,
992	11	3	2	2	2	2	ADP-ribosylation factor GTPase-activating protein AGD5 {ECO:0000303|PubMed:12644670};, KEGG:ath:AT5G54310,
993	17	4	4	2	2	5	Pentatricopeptide repeat-containing protein At1g08070, chloroplastic {ECO:0000305};,Pentatricopeptide repeat-containing protein At4g33170;,Elongator complex protein 4;,Pentatricopeptide repeat-containing protein At1g15510, chloroplastic;, KEGG:ath:AT1G08070,KEGG:ath:AT3G11220,KEGG:ath:AT4G33170,KEGG:ath:AT1G15510,
994	4	1	0	1	1	1	GDSL esterase/lipase At5g45910;, KEGG:ath:AT5G45910,
995	10	2	2	2	2	2	WD-40 repeat-containing protein MSI4 {ECO:0000305};, KEGG:ath:AT2G19520,
996	10	2	2	2	2	2	Phosphopantothenoylcysteine decarboxylase {ECO:0000303|PubMed:11279129};, KEGG:ath:AT3G18030,
997	25	5	5	5	5	5	Phragmoplastin DRP1E {ECO:0000305};,Phragmoplastin DRP1C {ECO:0000305};, KEGG:ath:AT1G14830,KEGG:ath:AT3G60190,
998	10	2	2	2	2	2	Zinc finger protein CONSTANS-LIKE 9;,Zinc finger protein CONSTANS-LIKE 10;, KEGG:ath:AT3G07650,KEGG:ath:AT5G48250,
999	10	2	2	2	2	2	Probable histidine kinase 1 {ECO:0000305};,Histidine kinase 5;, KEGG:ath:AT5G10720,
1000	48	10	10	8	9	11	Probable histone H2B.1;,Probable histone H2B.3;,Histone H2B.1;,Histone H2B.3;,THO complex subunit 4A;,THO complex subunit 4B;,Histone H2B;,Histone H2B.4;, KEGG:ath:AT2G28720,KEGG:ath:AT5G02530,KEGG:mtr:11417139,KEGG:mtr:11442767,KEGG:ghi:107950275,KEGG:ath:AT5G59950,KEGG:ath:AT2G37470,KEGG:ghi:107963943,
1001	4	2	1	0	0	1	Alpha-amylase inhibitor 1;,
1002	5	1	1	1	1	1	Protein MIZU-KUSSEI 1;, KEGG:ath:AT2G41660,
1003	7	1	1	1	1	3	Putative F-box/FBD/LRR-repeat protein At5g22670;,F-box/FBD/LRR-repeat protein At4g26340;,F-box protein At1g19070;,F-box/LRR-repeat protein At1g06630;,Putative FBD-associated F-box protein At5g22720;, KEGG:ath:AT1G06630,KEGG:ath:AT5G22720,KEGG:ath:AT1G19070,
1004	2	1	1	0	0	0	None
1005	10	2	2	2	2	2	None
1006	6	2	1	1	1	1	Protein ACTIVITY OF BC1 COMPLEX KINASE 8, chloroplastic {ECO:0000303|PubMed:22694836};, KEGG:ath:AT5G64940,
1007	5	1	1	1	1	1	None
1008	10	2	2	2	2	2	Calmodulin-like protein 8 {ECO:0000303|Ref.6};,Calmodulin-like protein 11;, KEGG:ath:AT4G14640,KEGG:ath:AT3G22930,
1009	5	1	1	1	1	1	1-aminocyclopropane-1-carboxylate oxidase 5;, KEGG:ath:AT1G77330,
1010	12	2	2	2	2	4	Triacylglycerol lipase 2;, KEGG:ath:AT5G14180,
1011	10	2	2	2	2	2	Large ribosomal subunit protein eL15z {ECO:0000303|PubMed:36423343};,Large ribosomal subunit protein eL15 {ECO:0000305};, KEGG:ath:AT4G16720,
1012	5	1	1	1	1	1	Protein IQ-DOMAIN 18 {ECO:0000303|PubMed:16368012};,Protein IQ-DOMAIN 17 {ECO:0000303|PubMed:16368012};, KEGG:ath:AT4G00820,KEGG:ath:AT1G01110,
1013	5	1	1	1	1	1	SOSS complex subunit B1;, KEGG:rno:362813,
1014	5	1	1	1	1	1	None
1015	4	1	1	0	1	1	None
1016	5	1	1	1	1	1	Heme-binding protein 2;, KEGG:hsa:23593,
1017	17	4	3	2	4	4	Pleiotropic drug resistance protein 1;,ABC transporter G family member 40 {ECO:0000303|PubMed:18299247};, KEGG:nta:107799533,
1018	5	1	1	1	1	1	Potassium transporter 25;, KEGG:osa:4330614,
1019	5	1	1	1	1	1	Embryo-specific protein ATS3B {ECO:0000305};, KEGG:ath:AT5G62200,
1020	15	3	3	3	3	3	EID1-like F-box protein 2;, KEGG:ath:AT5G39360,
1021	4	1	1	1	1	0	Dual specificity protein phosphatase PHS1;, KEGG:ath:AT5G23720,
1022	5	1	1	1	1	1	UDP-xylose transporter 1 {ECO:0000312|EMBL:AKA88212.1};, KEGG:ath:AT2G28315,
1023	6	1	1	1	2	1	Phospho-N-acetylmuramoyl-pentapeptide-transferase homolog;, KEGG:ath:AT4G18270,
1024	45	13	20	3	6	3	Zinc finger CCCH domain-containing protein 17;,Zinc finger CCCH domain-containing protein 48;, KEGG:osa:9271844,KEGG:ath:AT4G25440,
1025	6	2	2	1	1	0	None
1026	2	1	1	0	0	0	None
1027	2	1	0	0	0	1	None
1028	4	1	1	0	1	1	Probable serine/threonine-protein kinase PIX13 {ECO:0000305};, KEGG:ath:AT2G17220,
1029	15	3	3	3	3	3	Rho GDP-dissociation inhibitor 1;, KEGG:ath:AT3G07880,
1030	5	2	1	1	1	0	Alanine--tRNA ligase {ECO:0000255|HAMAP-Rule:MF_03133};, KEGG:ath:AT1G50200,
1031	7	2	1	1	2	1	ATPase family AAA domain-containing protein 5 {ECO:0000312|HGNC:HGNC:25752};, KEGG:hsa:79915,
1032	4	1	1	1	1	0	Mediator of RNA polymerase II transcription subunit 15a;, KEGG:ath:AT1G15780,
1033	2	2	0	0	0	0	None
1034	9	2	1	2	2	2	Protein BONZAI 3;, KEGG:ath:AT1G08860,
1035	5	1	1	1	1	1	NudC domain-containing protein 2;, KEGG:mmu:52653,
1036	5	1	1	1	1	1	None
1037	5	1	1	1	1	1	None
1038	6	2	1	1	1	1	Protein NRT1/ PTR FAMILY 2.9;,Protein NRT1/ PTR FAMILY 2.11;, KEGG:ath:AT5G62680,
1039	5	1	1	1	1	1	None
1040	10	2	1	2	3	2	Transcription factor bHLH52;,Transcription factor bHLH53;, KEGG:ath:AT1G30670,KEGG:ath:AT2G34820,
1041	5	1	1	1	1	1	MLO-like protein 13;, KEGG:ath:AT4G24250,
1042	5	1	1	1	1	1	Transcription termination factor MTERF15, mitochondrial {ECO:0000305};, KEGG:ath:AT1G74120,
1043	7	1	1	1	2	2	Disease resistance protein RPV1 {ECO:0000305};,
1044	5	1	1	1	1	1	None
1045	5	1	1	1	1	1	Ferredoxin-dependent glutamate synthase, chloroplastic {ECO:0000303|PubMed:8286406};,
1046	10	2	2	2	2	2	COBRA-like protein 7;, KEGG:ath:AT4G16120,
1047	5	1	1	1	1	1	None
1048	10	2	2	2	2	2	Protein transport protein Sec61 subunit alpha;, KEGG:ddi:DDB_G0278885,
1049	5	1	1	1	1	1	Serine/threonine-protein kinase PEPKR2;, KEGG:ath:AT1G12680,
1050	8	2	1	1	2	2	None
1051	5	1	1	1	1	1	Translocon-associated protein subunit beta;, KEGG:cfa:403950,
1052	5	1	1	1	1	1	Protein NETWORKED 4A {ECO:0000303|PubMed:22840520};, KEGG:ath:AT5G58320,
1053	26	6	4	5	5	6	Sulfite exporter TauE/SafE family protein 3 {ECO:0000312|EMBL:AEC07746.1};, KEGG:ath:AT2G25737,
1054	5	1	1	1	1	1	Protein VAPYRIN {ECO:0000303|PubMed:19912567};, KEGG:mtr:25495843,
1055	10	2	1	2	2	3	Zinc finger CCHC domain-containing protein 10;, KEGG:rno:360524,
1056	5	1	1	1	1	1	Protein RADIALIS-like 6;,Protein RADIALIS-like 1;, KEGG:ath:AT1G75250,KEGG:ath:AT4G39250,
1057	20	3	2	5	4	6	Actin-related protein 2;, KEGG:ath:AT3G27000,KEGG:osa:4345402,
1058	5	1	1	1	1	1	Beta-amylase;, KEGG:gmx:547931,
1059	11	2	2	2	3	2	Probable E3 ubiquitin-protein ligase LUL3;,Probable E3 ubiquitin-protein ligase LUL4;, KEGG:ath:AT3G06140,KEGG:ath:AT5G19080,
1060	10	2	2	2	2	2	Auxin-induced protein 22B;,
1061	5	1	1	1	1	1	Protein ESSENTIAL FOR POTEXVIRUS ACCUMULATION 1 {ECO:0000303|PubMed:27402258};, KEGG:ath:AT5G42950,
1062	5	1	1	1	1	1	Beta-glucosidase 46 {ECO:0000303|PubMed:15604686};, KEGG:ath:AT1G61820,
1063	5	1	1	1	1	1	None
1064	9	2	2	2	1	2	Ultraviolet-B receptor UVR8 {ECO:0000303|PubMed:12226503};, KEGG:ath:AT5G63860,
1065	10	2	2	2	2	2	Protein EIN4 {ECO:0000303|PubMed:9707532};, KEGG:ath:AT3G04580,
1066	4	1	1	0	1	1	SAP30-binding protein;, KEGG:hsa:29115,
1067	5	1	1	1	1	1	None
1068	15	3	3	3	3	3	Probable LRR receptor-like serine/threonine-protein kinase RKF3;, KEGG:ath:AT2G48010,
1069	10	3	3	1	1	2	Proliferating cell nuclear antigen;, KEGG:nta:107779602,
1070	33	9	8	2	4	10	Probable disease resistance protein At4g27220;,Disease resistance protein SUMM2 {ECO:0000305};,Disease resistance protein At4g27190;, KEGG:ath:AT1G12280,KEGG:ath:AT4G27190,KEGG:ath:AT4G27220,
1071	5	1	1	1	1	1	None
1072	5	1	1	1	1	1	None
1073	5	1	1	1	1	1	MACPF domain-containing protein At1g14780;, KEGG:ath:AT1G14780,
1074	5	1	1	1	1	1	Calcium sensing receptor, chloroplastic;, KEGG:ath:AT5G23060,
1075	2	1	1	0	0	0	None
1076	14	4	2	3	3	2	TBC1 domain family member 8B;,TBC1 domain family member 2A;,TBC1 domain family member 9;, KEGG:mmu:245638,KEGG:hsa:23158,KEGG:hsa:54885,
1077	20	4	4	4	4	4	Ubiquitin-conjugating enzyme E2 2;, KEGG:ath:AT2G02760,
1078	22	6	4	3	5	4	Isoflavone reductase {ECO:0000303|PubMed:28394400};, KEGG:gmx:100781316,
1079	22	4	4	3	4	7	Laccase-4;, KEGG:ath:AT2G38080,
1080	11	3	2	2	2	2	E3 ubiquitin-protein ligase CHIP {ECO:0000305};, KEGG:ath:AT3G07370,
1081	6	2	1	1	1	1	None
1082	10	2	2	2	2	2	Reticulon-like protein B8;, KEGG:ath:AT3G10260,
1083	43	11	12	2	9	9	ABC transporter C family member 3;, KEGG:ath:AT3G13080,
1084	5	1	1	1	1	1	Protein RKD5;, KEGG:ath:AT4G35590,
1085	6	2	1	1	1	1	Protein SEMI-ROLLED LEAF 2 {ECO:0000303|PubMed:26873975};,
1086	15	3	3	3	3	3	Jasmonate-induced oxygenase 4 {ECO:0000303|PubMed:28559313};,Jasmonate-induced oxygenase 2 {ECO:0000303|PubMed:28559313};, KEGG:ath:AT5G05600,KEGG:ath:AT2G38240,
1087	5	1	1	1	1	1	None
1088	5	1	1	1	1	1	Agamous-like MADS-box protein AGL12 {ECO:0000305};, KEGG:ath:AT1G71692,
1089	5	1	1	1	1	1	Clustered mitochondria protein {ECO:0000305|PubMed:14617080};, KEGG:ath:AT3G52140,
1090	11	3	3	1	2	2	Protein trichome birefringence-like 34;, KEGG:ath:AT2G38320,
1091	44	9	8	9	9	9	Serine/threonine-protein phosphatase PP1;,Serine/threonine-protein phosphatase PP1 isozyme 4 {ECO:0000305};, KEGG:ath:AT2G39840,
1092	8	2	1	2	2	1	QWRF motif-containing protein 3;, KEGG:ath:AT2G20815,
1093	10	2	2	2	2	2	Serine/threonine-protein kinase BSK7 {ECO:0000305};,Serine/threonine-protein kinase BSK3 {ECO:0000305};, KEGG:ath:AT4G00710,KEGG:ath:AT1G63500,
1094	5	1	1	1	1	1	F-box protein SKIP31;, KEGG:ath:AT5G45360,
1095	10	2	2	2	2	2	Cellulose synthase A catalytic subunit 3 [UDP-forming] {ECO:0000303|PubMed:11178255, ECO:0000303|PubMed:12068120};, KEGG:ath:AT5G05170,
1096	7	3	1	1	1	1	Abscisic acid receptor PYL4 {ECO:0000303|PubMed:19407142, ECO:0000303|PubMed:19624469, ECO:0000303|PubMed:19898420, ECO:0000303|PubMed:21658606, ECO:0000303|PubMed:23844015, ECO:0000303|PubMed:24563205};, KEGG:ath:AT2G38310,
1097	15	3	3	3	3	3	Serine/threonine-protein kinase SRPK {ECO:0000303|PubMed:19657567};,SRSF protein kinase 1;,Protein kinase dsk1;, KEGG:spo:SPBC530.14c,
1098	5	1	1	1	1	1	Peptidyl-prolyl cis-trans isomerase FKBP17-1, chloroplastic;, KEGG:ath:AT4G19830,
1099	6	2	1	0	1	2	RNA-binding protein 12B;, KEGG:hsa:389677,
1100	10	2	2	2	2	2	Defensin-like protein;,
1101	4	1	1	0	1	1	Guanylate-binding protein 4;, KEGG:hsa:115361,
1102	15	3	3	3	3	3	Small ribosomal subunit protein eS7 {ECO:0000305};,Small ribosomal subunit protein eS7x {ECO:0000303|PubMed:36423343};,Small ribosomal subunit protein eS7y {ECO:0000303|PubMed:36423343};, KEGG:ath:AT5G16130,
1103	6	1	1	1	1	2	F-box/kelch-repeat protein At3g23880;, KEGG:ath:AT3G23880,
1104	10	2	2	2	2	2	CASP-like protein 4B1;,CASP-like protein 4B4;, KEGG:osa:4338478,
1105	4	1	1	0	1	1	None
1106	11	3	2	2	2	2	Probable 2-oxoglutarate-dependent dioxygenase AOP1.2;,Deoxypodophyllotoxin synthase {ECO:0000303|PubMed:26359402};,Probable 2-oxoglutarate-dependent dioxygenase AOP1;, KEGG:ath:AT4G03070,KEGG:ag:ALG05135,
1107	10	2	2	2	2	2	Protein PSK SIMULATOR 1 {ECO:0000303|PubMed:25062973};, KEGG:ath:AT1G34320,
1108	10	2	2	2	2	2	Dehydration-responsive element-binding protein 2F;, KEGG:ath:AT3G57600,
1109	10	2	2	2	2	2	Probable 2' cyclic ADP-D-ribose synthase BdTIR {ECO:0000305};, KEGG:bdi:100831488,
1110	5	1	1	1	1	1	Hippocampus abundant transcript 1 protein {ECO:0000250|UniProtKB:Q96MC6};,Hippocampus abundant transcript 1 protein {ECO:0000312|HGNC:HGNC:23363};, KEGG:hsa:64645,KEGG:mmu:15247,
1111	5	1	1	1	1	1	E3 ubiquitin-protein ligase AIRP2 {ECO:0000305};, KEGG:ath:AT5G01520,
1112	2	2	0	0	0	0	None
1113	5	1	1	1	1	1	None
1114	5	1	1	1	1	1	Probable 2-oxoglutarate-dependent dioxygenase AOP1.2;,
1115	5	1	1	1	1	1	Seed biotin-containing protein SBP65;, KEGG:gmx:547879,
1116	10	2	2	2	2	2	Probable protein phosphatase 2C 52;, KEGG:ath:AT4G03415,
1117	5	1	1	1	1	1	Early nodulin-like protein 14 {ECO:0000303|PubMed:19897921};,Early nodulin-like protein 15 {ECO:0000303|PubMed:19897921};, KEGG:ath:AT4G31840,KEGG:ath:AT2G25060,
1118	5	1	1	1	1	1	Probable DNA helicase MCM9;, KEGG:ath:AT2G14050,
1119	17	3	3	3	3	5	Protein DETOXIFICATION 21 {ECO:0000303|PubMed:11739388};, KEGG:ath:AT1G33110,
1120	5	1	1	1	1	1	Protein NRT1/ PTR FAMILY 3.1;, KEGG:ath:AT1G68570,
1121	5	1	1	1	1	1	Pentatricopeptide repeat-containing protein At5g42310, chloroplastic {ECO:0000305};, KEGG:ath:AT5G42310,
1122	5	1	1	1	1	1	Plastoglobule-localized metallopeptidase 48, chloroplastic {ECO:0000303|PubMed:27895226};, KEGG:ath:AT3G27110,
1123	5	1	1	1	1	1	Signal recognition particle subunit SRP72;, KEGG:cfa:403944,KEGG:hsa:6731,
1124	5	1	1	1	1	1	B3 domain-containing protein Os07g0563300;, KEGG:osa:4343608,
1125	21	4	3	5	5	4	Sugar transport protein 5;, KEGG:ath:AT1G34580,
1126	5	1	1	1	1	1	CBS domain-containing protein CBSX5;, KEGG:ath:AT4G27460,
1127	15	3	3	3	3	3	ARF guanine-nucleotide exchange factor GNOM;, KEGG:ath:AT1G13980,
1128	17	5	1	3	4	4	Ubiquitin domain-containing protein 7SL RNA1 {ECO:0000305|PubMed:7688456};, KEGG:ath:AT4G02970,
1129	19	5	4	3	4	3	Probable serine/threonine protein phosphatase 2A regulatory subunit B''delta;,Serine/threonine protein phosphatase 2A regulatory subunit B''alpha;,Probable serine/threonine protein phosphatase 2A regulatory subunit B''gamma;,Serine/threonine protein phosphatase 2A regulatory subunit B''beta;, KEGG:ath:AT5G44090,KEGG:ath:AT5G28850,KEGG:ath:AT5G28900,
1130	5	1	1	1	1	1	Prolyl-tRNA synthetase associated domain-containing protein 1;, KEGG:xla:431901,
1131	12	3	3	2	2	2	[Pyruvate dehydrogenase (acetyl-transferring)] kinase, mitochondrial;, KEGG:ath:AT3G06483,
1132	5	1	1	1	1	1	Cyclin-dependent kinase inhibitor 7;, KEGG:ath:AT1G49620,
1133	5	1	1	1	1	1	DNA repair protein RAD51 homolog 2;, KEGG:ath:AT2G28560,
1134	50	21	17	3	3	6	Pterocarpan synthase 1 {ECO:0000303|PubMed:28394400};,Membrane-anchored ubiquitin-fold protein 3;, KEGG:gmx:100500621,KEGG:osa:4330742,
1135	10	2	2	2	2	2	Probable LRR receptor-like serine/threonine-protein kinase At1g67720;, KEGG:ath:AT1G67720,
1136	5	1	1	1	1	1	None
1137	15	3	2	3	4	3	Probable receptor-like protein kinase At2g23200;,Probable receptor-like protein kinase At5g24010;, KEGG:ath:AT5G24010,KEGG:ath:AT2G23200,
1138	5	1	1	1	1	1	None
1139	5	1	1	1	1	1	None
1140	5	1	1	1	1	1	p21-activated protein kinase-interacting protein 1-like;, KEGG:dre:336470,
1141	5	1	1	1	1	1	Vesicle-associated protein 2-1;, KEGG:ath:AT5G47180,
1142	9	2	2	1	2	2	Auxin-responsive protein SAUR32 {ECO:0000305};, KEGG:ath:AT2G46690,
1143	14	3	3	2	3	3	Protein transport protein SEC13 homolog B {ECO:0000305};, KEGG:ath:AT2G30050,
1144	15	2	5	2	2	4	None
1145	3	1	1	0	0	1	AAA-ATPase ASD, mitochondrial;, KEGG:ath:AT5G40010,
1146	33	7	8	1	10	7	Putative disease resistance protein RGA1;,Disease resistance protein RGA2;,Putative disease resistance protein RGA4;,
1147	11	2	6	1	1	1	3-hydroxy-3-methylglutaryl-coenzyme A reductase 2;,
1148	5	1	1	1	1	1	None
1149	6	2	1	1	1	1	Histone-lysine N-methyltransferase SUVR3;, KEGG:ath:AT3G03750,
1150	5	1	1	1	1	1	Kinesin-like protein KIN-1 {ECO:0000305};, KEGG:ath:AT3G63480,
1151	4	1	0	1	1	1	Peptidyl-prolyl cis-trans isomerase CYP63;, KEGG:ath:AT3G63400,
1152	10	2	2	2	2	2	None
1153	5	1	1	1	1	1	Oligopeptide transporter 7;, KEGG:ath:AT4G10770,
1154	5	1	1	1	1	1	Dof zinc finger protein DOF1.4;, KEGG:ath:AT1G28310,
1155	5	1	1	1	1	1	None
1156	5	1	1	1	1	1	Probable pinoresinol-lariciresinol reductase 3;, KEGG:ath:AT4G34540,
1157	5	1	1	1	1	1	Aspartic proteinase NANA, chloroplast {ECO:0000303|PubMed:22987884};, KEGG:ath:AT3G12700,
1158	2	2	0	0	0	0	None
1159	5	1	1	1	1	1	Cyclin-dependent protein kinase inhibitor SMR5 {ECO:0000303|PubMed:17599908, ECO:0000303|PubMed:24399300, ECO:0000303|PubMed:26546445};, KEGG:ath:AT1G07500,
1160	10	2	2	2	2	2	RING-H2 finger protein ATL70;,Putative RING-H2 finger protein ATL71;, KEGG:ath:AT5G06490,KEGG:ath:AT2G35910,
1161	10	2	2	2	2	2	Probable magnesium transporter NIPA7;,Probable magnesium transporter NIPA6;, KEGG:ath:AT4G38730,KEGG:ath:AT2G21120,
1162	9	2	2	2	1	2	Fe(2+) transport protein 2;,Fe(2+) transport protein 1;, KEGG:osa:4333669,KEGG:osa:4333667,
1163	5	1	1	1	1	1	None
1164	10	2	2	2	2	2	Probable methyltransferase PMT16;, KEGG:ath:AT2G45750,
1165	5	1	1	1	1	1	PsbP domain-containing protein 2, chloroplastic;, KEGG:ath:AT2G28605,
1166	51	15	12	9	10	5	Sugar transport protein 11;,Sugar transport protein 10 {ECO:0000303|PubMed:16923188};,Sugar transport protein MST5 {ECO:0000305};, KEGG:osa:4344808,KEGG:ath:AT3G19940,
1167	15	3	3	3	3	3	Alkaline/neutral invertase C, mitochondrial {ECO:0000305};,Probable alkaline/neutral invertase A, chloroplastic {ECO:0000305};,Alkaline/neutral invertase A, mitochondrial {ECO:0000305};, KEGG:ath:AT1G56560,KEGG:ath:AT3G06500,KEGG:ath:AT3G05820,
1168	5	1	1	1	1	1	Probable 3-hydroxyisobutyrate dehydrogenase-like 1, mitochondrial;, KEGG:ath:AT4G29120,
1169	5	1	1	1	1	1	Probable GTP-binding protein OBGM, mitochondrial;, KEGG:ath:AT1G07615,
1170	5	1	1	1	1	1	Primary amine oxidase;, KEGG:ag:AAA62490,
1171	5	1	1	1	1	1	Protein argonaute 7;, KEGG:ath:AT1G69440,
1172	3	1	1	0	0	1	DNA-binding protein RHL1;, KEGG:ath:AT1G48380,
1173	25	7	5	2	6	5	Cyanogenic beta-glucosidase;,Beta-glucosidase 24;, KEGG:osa:4340890,
1174	19	4	5	3	3	4	Agamous-like MADS-box protein MADS1 {ECO:0000305};,Agamous-like MADS-box protein AGL11 {ECO:0000305};,Agamous-like MADS-box protein AGL1;,Floral homeotic protein AGAMOUS;, KEGG:vvi:100232870,KEGG:ath:AT3G58780,KEGG:vvi:100232864,
1175	5	1	1	1	1	1	Trihelix transcription factor ENAP2 {ECO:0000305};,Trihelix transcription factor ENAP1 {ECO:0000305};,Trihelix transcription factor ASIL2 {ECO:0000305};, KEGG:ath:AT3G11100,KEGG:ath:AT5G05550,
1176	30	7	6	6	6	5	E3 ubiquitin-protein ligase SINAT5 {ECO:0000305};,E3 ubiquitin-protein ligase SINAT4 {ECO:0000305};,E3 ubiquitin-protein ligase SINAT2 {ECO:0000305};,E3 ubiquitin-protein ligase DIS1 {ECO:0000305};,E3 ubiquitin-protein ligase SINAT3 {ECO:0000305};, KEGG:ath:AT5G53360,KEGG:ath:AT3G61790,KEGG:ath:AT3G58040,KEGG:ath:AT4G27880,
1177	13	3	3	1	3	3	Peroxidase RIP1 {ECO:0000303|PubMed:7696879};, KEGG:mtr:11426647,
1178	10	2	2	2	2	2	Pantothenate kinase 2 {ECO:0000303|PubMed:16897480};, KEGG:ath:AT4G32180,
1179	2	1	0	0	0	1	Lysine-specific histone demethylase 1 homolog 1 {ECO:0000303|PubMed:17921315};, KEGG:ath:AT1G62830,
1180	10	2	2	2	2	2	None
1181	2	1	1	0	0	0	None
1182	5	1	1	1	1	1	Protein DETOXIFICATION 56 {ECO:0000303|PubMed:11739388};, KEGG:ath:AT4G22790,
1183	5	1	1	1	1	1	Pentatricopeptide repeat-containing protein At1g52620;, KEGG:ath:AT1G52620,
1184	10	2	2	2	2	2	Large ribosomal subunit protein uL4 {ECO:0000255|HAMAP-Rule:MF_01328};, KEGG:rce:RC1_0712,
1185	5	1	1	1	1	1	Probable F-box protein At3g61730;, KEGG:ath:AT3G61730,
1186	10	2	2	2	2	2	CBS domain-containing protein CBSCBSPB1;,CBS domain-containing protein CBSCBSPB5;, KEGG:ath:AT5G50530,KEGG:ath:AT5G50640,
1187	21	5	4	3	4	5	Probable 1-deoxy-D-xylulose-5-phosphate synthase 2, chloroplastic;,Probable 1-deoxy-D-xylulose-5-phosphate synthase, chloroplastic;, KEGG:osa:4342614,
1188	4	1	0	1	1	1	FAS1 domain-containing protein SELMODRAFT_448915;, KEGG:smo:SELMODRAFT_448915,
1189	5	1	1	1	1	1	Probable LRR receptor-like serine/threonine-protein kinase At1g53420;,Probable leucine-rich repeat receptor-like serine/threonine-protein kinase At3g14840;, KEGG:ath:AT1G53420,KEGG:ath:AT3G14840,
1190	5	1	1	1	1	1	Chaperone protein dnaJ 15;, KEGG:ath:AT1G68370,
1191	5	1	1	1	1	1	tRNA pseudouridine synthase B {ECO:0000255|HAMAP-Rule:MF_01080};, KEGG:fjo:Fjoh_0570,
1192	44	13	5	6	12	8	Receptor-like serine/threonine-protein kinase SD1-8;,G-type lectin S-receptor-like serine/threonine-protein kinase At1g67520;,Putative serine/threonine-protein kinase receptor;,G-type lectin S-receptor-like serine/threonine-protein kinase CES101;, KEGG:ath:AT1G67520,KEGG:ath:AT3G16030,KEGG:ath:AT4G21380,
1193	10	2	2	2	2	2	Probable protein phosphatase 2C 12;, KEGG:ath:AT1G47380,
1194	35	8	5	4	10	8	Cinnamyl alcohol dehydrogenase 8 {ECO:0000303|PubMed:14745009};,Protein DJ-1 homolog D;,Probable mannitol dehydrogenase;, KEGG:ath:AT3G02720,KEGG:ath:AT4G37990,
1195	10	3	2	2	2	1	Protein neprosin {ECO:0000303|PubMed:27481162};,
1196	5	1	1	1	1	1	Protein KRTCAP2 homolog;,
1197	5	1	1	1	1	1	Thaumatin-like protein 1 {ECO:0000303|PubMed:15988566};, KEGG:ath:AT4G24180,
1198	5	1	1	1	1	1	Putative F-box protein At1g67390;, KEGG:ath:AT1G67390,
1199	10	2	2	2	2	2	Probable lactoylglutathione lyase, chloroplastic;, KEGG:ath:AT1G67280,
1200	5	1	1	1	1	1	Probable transmembrane ascorbate ferrireductase 4;, KEGG:ath:AT1G26100,
1201	10	2	2	2	2	2	RING-H2 finger protein ATL74;,RING-H2 finger protein ATL73;, KEGG:ath:AT5G05280,
1202	4	1	0	1	1	1	Protein JINGUBANG {ECO:0000303|PubMed:27468890};, KEGG:ath:AT2G26490,
1203	9	2	2	1	2	2	Protein PIGMENT DEFECTIVE 338, chloroplastic {ECO:0000303|PubMed:21139083};, KEGG:ath:AT1G71720,
1204	5	1	1	1	1	1	Probable glycosyltransferase At5g03795;, KEGG:ath:AT5G03795,
1205	10	2	2	2	2	2	GDP-L-galactose phosphorylase 1;, KEGG:ath:AT4G26850,
1206	8	2	2	2	1	1	None
1207	4	1	0	1	1	1	Triphosphate tunnel metalloenzyme 3;, KEGG:ath:AT2G11890,
1208	10	2	2	2	2	2	Monothiol glutaredoxin-S10;, KEGG:ath:AT3G21460,
1209	5	1	1	1	1	1	None
1210	14	3	3	2	3	3	Glucan endo-1,3-beta-D-glucosidase {ECO:0000305};,
1211	5	1	1	1	1	1	None
1212	16	3	3	3	4	3	Large ribosomal subunit protein eL34 {ECO:0000305};, KEGG:nta:107763405,KEGG:nta:107779746,
1213	6	1	2	0	1	2	Protein SCAF11;, KEGG:hsa:9169,
1214	10	2	2	2	2	2	Polyadenylate-binding protein RBP45;,Polyadenylate-binding protein RBP45B;, KEGG:ath:AT1G11650,
1215	9	2	2	1	2	2	NAD(P)H-dependent 6'-deoxychalcone synthase;, KEGG:gmx:547911,
1216	10	2	2	2	2	2	Folate transporter 1, chloroplastic;, KEGG:ath:AT5G66380,
1217	5	1	1	1	1	1	None
1218	6	1	1	1	1	2	Dof zinc finger protein DOF3.7;,Dof zinc finger protein DOF4.6 {ECO:0000303|PubMed:12475498};, KEGG:ath:AT3G61850,
1219	5	1	1	1	1	1	RING-H2 finger protein ATL54;,E3 ubiquitin-protein ligase RING1;, KEGG:ath:AT5G10380,KEGG:ath:AT1G72220,
1220	3	1	0	0	0	2	None
1221	5	1	1	1	1	1	Protein BLISTER {ECO:0000303|PubMed:20647345};, KEGG:ath:AT3G23980,
1222	10	2	2	2	2	2	Transcription factor LHW;, KEGG:ath:AT2G27230,
1223	4	1	0	1	1	1	None
1224	32	6	6	3	7	10	Cytochrome P450 71D9;,Cytochrome P450 71D11;, KEGG:gmx:100814284,
1225	2	1	1	0	0	0	None
1226	10	2	2	2	2	2	Transcription factor MUTE;,Transcription factor SPEECHLESS {ECO:0000303|PubMed:17183265};, KEGG:ath:AT5G53210,
1227	3	1	1	0	0	1	UPF0496 protein 3;,
1228	5	1	1	1	1	1	Scarecrow-like protein 5;, KEGG:ath:AT1G50600,
1229	5	1	1	1	1	1	Putative Myb family transcription factor At1g14600;, KEGG:ath:AT1G14600,
1230	6	2	1	0	1	2	None
1231	5	1	1	1	1	1	Nicotianamine synthase;, KEGG:sly:101248619,
1232	5	1	1	1	1	1	Protein SOSEKI 5 {ECO:0000303|PubMed:30737509};, KEGG:ath:AT5G59790,
1233	10	2	2	2	2	2	Cationic amino acid transporter 2, vacuolar;, KEGG:ath:AT1G58030,
1234	5	1	1	1	1	1	Rho GTPase-activating protein 7;, KEGG:ath:AT5G19390,
1235	10	2	2	2	2	2	RNA cytosine-C(5)-methyltransferase NSUN2 {ECO:0000305};,RNA cytosine C(5)-methyltransferase NSUN2 {ECO:0000305};, KEGG:mmu:28114,KEGG:gga:420938,KEGG:xla:414460,
1236	5	1	1	1	1	1	None
1237	5	1	1	1	1	1	Amino acid transporter ANT1 {ECO:0000305};, KEGG:ath:AT3G11900,
1238	10	2	2	2	2	2	Gibberellin 20 oxidase 1 {ECO:0000305|PubMed:7630935};,Gibberellin 20 oxidase 2 {ECO:0000305|PubMed:7630935};, KEGG:ath:AT4G25420,KEGG:ath:AT5G51810,
1239	9	2	2	1	2	2	Protein DETOXIFICATION 19 {ECO:0000303|PubMed:11739388};, KEGG:ath:AT3G23560,
1240	10	2	2	2	2	2	Adenylate kinase 1, chloroplastic;,Probable adenylate kinase 1, chloroplastic;, KEGG:ath:AT2G37250,KEGG:osa:4331502,
1241	5	2	1	0	1	1	None
1242	13	2	2	3	3	3	Ubiquinone biosynthesis protein COQ4 homolog, mitochondrial {ECO:0000255|HAMAP-Rule:MF_03111};, KEGG:ath:AT2G03690,
1243	10	2	2	2	2	2	Probable aspartyl protease At4g16563 {ECO:0000305};, KEGG:ath:AT4G16563,
1244	5	1	1	1	1	1	None
1245	5	1	1	1	1	1	High mobility group B protein 10;, KEGG:ath:AT3G13350,
1246	10	2	2	2	2	2	Glucose-6-phosphate isomerase 1, chloroplastic;, KEGG:ath:AT4G24620,
1247	3	1	1	0	0	1	None
1248	14	3	3	2	3	3	G-type lectin S-receptor-like serine/threonine-protein kinase At2g19130;, KEGG:ath:AT2G19130,
1249	10	2	2	2	2	2	Aldehyde oxidase GLOX1 {ECO:0000305};, KEGG:ath:AT1G67290,
1250	6	2	1	1	1	1	U-box domain-containing protein 13;, KEGG:ath:AT3G46510,
1251	9	2	1	2	2	2	Protein DETOXIFICATION 27 {ECO:0000303|PubMed:11739388};, KEGG:ath:AT5G65380,
1252	4	1	1	0	1	1	Probable helicase MAGATAMA 3;, KEGG:ath:AT4G15570,
1253	50	12	11	5	8	14	Cytosolic sulfotransferase 15;, KEGG:ath:AT5G07010,
1254	5	1	1	1	1	1	Mediator of RNA polymerase II transcription subunit 25 {ECO:0000305};, KEGG:sly:101258928,
1255	6	1	2	0	1	2	Probable LRR receptor-like serine/threonine-protein kinase At3g47570;,LRR receptor-like serine/threonine-protein kinase EFR {ECO:0000303|PubMed:16713565};, KEGG:ath:AT5G20480,KEGG:ath:AT3G47570,
1256	10	2	2	2	2	2	Chlorophyll a-b binding protein CP24 10A, chloroplastic;, KEGG:sly:101256629,
1257	5	1	1	1	1	1	Putative pentatricopeptide repeat-containing protein At1g68930;, KEGG:ath:AT1G68930,
1258	5	1	1	1	1	1	Retinoblastoma-related protein;,Retinoblastoma-related protein 1;,
1259	5	1	1	1	1	1	Heavy metal-associated isoprenylated plant protein 3 {ECO:0000303|PubMed:21072340, ECO:0000303|PubMed:23368984};, KEGG:ath:AT5G60800,
1260	5	1	1	1	1	1	Protein LURP-one-related 15;, KEGG:ath:AT5G01750,
1261	10	2	2	2	2	2	Ras-related protein RABA4d;, KEGG:ath:AT3G12160,
1262	5	1	1	1	1	1	Probable LRR receptor-like serine/threonine-protein kinase At1g67720;, KEGG:ath:AT1G67720,
1263	5	1	1	1	1	1	Beta-amyrin 24-hydroxylase;, KEGG:gmx:100037459,
1264	5	2	0	1	1	1	C2 and GRAM domain-containing protein At5g50170;, KEGG:ath:AT5G50170,
1265	2	1	0	0	0	1	None
1266	8	2	3	1	1	1	tRNA (guanine(37)-N1)-methyltransferase 1 {ECO:0000255|HAMAP-Rule:MF_03152};,
1267	5	1	1	1	1	1	E3 ubiquitin-protein ligase BIG BROTHER;, KEGG:ath:AT3G63530,
1268	6	1	1	1	1	2	Protein S40-7 {ECO:0000303|PubMed:20238146};, KEGG:ath:AT3G15040,
1269	10	3	2	1	2	2	Pentatricopeptide repeat-containing protein At1g09900;, KEGG:ath:AT1G09900,
1270	9	3	2	1	1	2	None
1271	15	3	3	3	3	3	Topless-related protein 1;,Topless-related protein 4;,Protein TOPLESS;, KEGG:ath:AT1G80490,KEGG:ath:AT3G15880,KEGG:ath:AT1G15750,
1272	5	1	1	1	1	1	AT-rich interactive domain-containing protein 4;, KEGG:ath:AT3G43240,
1273	10	2	2	2	2	2	None
1274	5	1	1	1	1	1	None
1275	3	2	1	0	0	0	None
1276	19	3	5	3	4	4	Receptor-like protein EIX2 {ECO:0000305};, KEGG:sly:101263330,
1277	79	36	20	5	7	11	18.5 kDa class I heat shock protein;,17.5 kDa class I heat shock protein;,17.3 kDa class I heat shock protein;,18.2 kDa class I heat shock protein;, KEGG:gmx:100305750,KEGG:gmx:100499727,KEGG:gmx:100526870,
1278	5	1	1	1	1	1	Putative receptor protein kinase ZmPK1;, KEGG:zma:542378,
1279	5	1	1	1	1	1	None
1280	5	1	1	1	1	1	Sister chromatid cohesion 1 protein 2;, KEGG:ath:AT5G40840,
1281	10	2	2	2	2	2	21 kDa protein;,
1282	10	2	2	2	2	2	Probable 26S proteasome non-ATPase regulatory subunit 3;, KEGG:nta:107767363,
1283	3	1	1	0	0	1	Protein yippee-like;,Protein yippee-like At3g08990;, KEGG:sot:102577430,
1284	5	1	1	1	1	1	Selenoprotein K {ECO:0000250|UniProtKB:Q9Y6D0};,
1285	10	2	2	2	2	2	HVA22-like protein a;, KEGG:ath:AT1G74520,
1286	6	1	1	1	2	1	IAA-amino acid hydrolase ILR1-like 5;, KEGG:osa:4336428,
1287	7	1	1	1	1	3	Choline monooxygenase, chloroplastic;, KEGG:ath:AT4G29890,
1288	21	5	3	4	4	5	pEARLI1-like lipid transfer protein 2;,pEARLI1-like lipid transfer protein 3;,14 kDa proline-rich protein DC2.15;, KEGG:ath:AT4G12490,KEGG:ath:AT4G12500,
1289	16	3	3	3	3	4	Nuclear transcription factor Y subunit B-8;,Nuclear transcription factor Y subunit B-10;, KEGG:ath:AT3G53340,KEGG:ath:AT2G37060,
1290	5	1	1	1	1	1	2-methylpropanoate--CoA ligase CCL4 {ECO:0000305|PubMed:23300257};,
1291	10	2	2	2	2	2	Probable arabinosyltransferase ARAD1;, KEGG:ath:AT2G35100,
1292	5	4	0	0	0	1	Lysine-specific demethylase JMJ703;, KEGG:osa:4338043,
1293	5	1	1	1	1	1	Protein CANDIDATE G-PROTEIN COUPLED RECEPTOR 2 {ECO:0000303|PubMed:18671868};, KEGG:ath:AT3G05010,
1294	16	3	4	3	3	3	Short-chain dehydrogenase TIC 32 B, chloroplastic {ECO:0000305};,Protein UXT homolog;, KEGG:ddi:DDB_G0285389,
1295	5	1	1	1	1	1	None
1296	9	2	2	1	2	2	Uncharacterized protein At4g14342;, KEGG:ath:AT4G14342,
1297	5	1	1	1	1	1	Protein NDH-DEPENDENT CYCLIC ELECTRON FLOW 5 {ECO:0000305};, KEGG:ath:AT1G55370,
1298	5	1	1	1	1	1	Protein EXORDIUM-like 2;, KEGG:ath:AT5G64260,
1299	10	2	2	2	2	2	Probable serine/threonine-protein kinase At1g01540;, KEGG:ath:AT1G01540,
1300	5	1	1	1	1	1	Kinesin-like protein KIN-7D, mitochondrial {ECO:0000305};,RING finger protein B;, KEGG:ddi:DDB_G0268860,
1301	5	1	1	1	1	1	tRNA pseudouridine synthase A {ECO:0000255|HAMAP-Rule:MF_00171};, KEGG:bhe:BH00740,KEGG:rde:RD1_2070,
1302	9	2	2	1	2	2	Cationic peroxidase 1;,
1303	5	1	1	1	1	1	None
1304	16	4	2	2	5	3	Diacylglycerol lipase-alpha;,Diacylglycerol lipase-alpha {ECO:0000303|PubMed:26779719};, KEGG:hsa:747,KEGG:rno:309207,
1305	6	1	1	2	1	1	Hydroxycinnamoyltransferase {ECO:0000303|PubMed:29229969};,
1306	20	4	4	4	4	4	E3 ubiquitin-protein ligase RGLG5 {ECO:0000305};,E3 ubiquitin-protein ligase RGLG2 {ECO:0000305};, KEGG:ath:AT5G14420,KEGG:ath:AT1G67800,
1307	5	1	1	1	1	1	DnaJ homolog subfamily B member 12 {ECO:0000312|MGI:MGI:1931881};,Chaperone protein DnaJ {ECO:0000255|HAMAP-Rule:MF_01152};, KEGG:mmu:56709,
1308	11	3	2	2	2	2	Putative cyclic nucleotide-gated ion channel 8;,Probable cyclic nucleotide-gated ion channel 5;,Probable cyclic nucleotide-gated ion channel 6;, KEGG:ath:AT2G23980,KEGG:ath:AT5G57940,KEGG:ath:AT1G19780,
1309	5	1	1	1	1	1	Protein EMBRYONIC FLOWER 1 {ECO:0000303|PubMed:11487698};, KEGG:ath:AT5G11530,
1310	5	1	1	1	1	1	Probable galacturonosyltransferase 3;, KEGG:ath:AT4G38270,
1311	25	9	0	4	4	8	UDP-glycosyltransferase 83A1;, KEGG:ath:AT3G02100,
1312	5	1	1	1	1	1	L10-interacting MYB domain-containing protein {ECO:0000303|PubMed:25707794};, KEGG:ath:AT5G05800,
1313	5	1	1	1	1	1	CASP-like protein 4D1;, KEGG:aly:9317728,
1314	5	1	1	1	1	1	Pirin-like protein;, KEGG:sly:543607,
1315	5	1	1	1	1	1	mRNA-decapping enzyme subunit 2;, KEGG:ath:AT5G13570,
1316	28	7	6	3	5	7	Putative leucine-rich repeat receptor-like serine/threonine-protein kinase At3g53590;,Probable LRR receptor-like serine/threonine-protein kinase At1g06840;, KEGG:ath:AT1G06840,
1317	10	2	2	2	2	2	Heavy metal-associated isoprenylated plant protein 26 {ECO:0000303|PubMed:21072340, ECO:0000303|PubMed:23368984};, KEGG:ath:AT4G38580,
1318	5	1	1	1	1	1	Protein ILITYHIA {ECO:0000312|EMBL:AEE34290.1};, KEGG:ath:AT1G64790,
1319	4	1	0	1	1	1	Pentatricopeptide repeat-containing protein At5g65560;, KEGG:ath:AT5G65560,
1320	12	2	2	3	3	2	Two-component response regulator ARR14;,Two-component response regulator ORR21 {ECO:0000305};, KEGG:ath:AT2G01760,KEGG:osa:4332111,
1321	9	2	2	2	1	2	Probable small nuclear ribonucleoprotein Sm D2;, KEGG:cel:CELE_C52E4.3,KEGG:dme:Dmel_CG1249,KEGG:ddi:DDB_G0285395,
1322	7	1	1	1	2	2	Pentatricopeptide repeat-containing protein At3g18020;, KEGG:ath:AT3G18020,
1323	5	1	1	1	1	1	Putative pentatricopeptide repeat-containing protein At5g13230, mitochondrial;, KEGG:ath:AT5G13230,
1324	4	1	1	0	1	1	Zinc finger MYND domain-containing protein 15;, KEGG:mmu:574428,
1325	10	2	2	2	2	2	Membrane-associated protein VIPP1, chloroplastic;,Membrane-associated protein VIPP1, chloroplastic {ECO:0000250|UniProtKB:O80796};, KEGG:ath:AT1G65260,
1326	5	1	1	1	1	1	Uncharacterized protein At4g22758;, KEGG:ath:AT4G22758,
1327	5	1	1	1	1	1	Electron transfer flavoprotein-ubiquinone oxidoreductase, mitochondrial;, KEGG:ath:AT2G43400,
1328	5	1	1	1	1	1	Uncharacterized protein At1g32220, chloroplastic;, KEGG:ath:AT1G32220,
1329	5	1	1	1	1	1	None
1330	15	3	3	3	3	3	LOB domain-containing protein 11;,LOB domain-containing protein 1;, KEGG:ath:AT2G28500,KEGG:ath:AT1G07900,
1331	5	1	1	1	1	1	Pentatricopeptide repeat-containing protein At3g04760, chloroplastic;,Pentatricopeptide repeat-containing protein At5g02860;,Pentatricopeptide repeat-containing protein At1g22960, mitochondrial;, KEGG:ath:AT3G04760,KEGG:ath:AT1G22960,
1332	5	1	1	1	1	1	Aldehyde dehydrogenase family 7 member A1;,
1333	4	1	1	0	1	1	Probable linoleate 9S-lipoxygenase 5;, KEGG:sot:102577714,
1334	10	2	2	2	2	2	None
1335	10	2	2	2	2	2	Scarecrow-like protein 6;, KEGG:ath:AT4G00150,
1336	5	1	1	1	1	1	Large ribosomal subunit protein bL27 {ECO:0000255|HAMAP-Rule:MF_00539};, KEGG:vpa:VP0329,
1337	5	1	1	1	1	1	Cyclin-D4-1;, KEGG:osa:4347313,
1338	10	2	2	2	2	2	RNA-binding KH domain-containing protein PEPPER {ECO:0000303|PubMed:16356489};, KEGG:ath:AT4G26000,
1339	9	1	2	2	2	2	Probable transcription factor KAN2;, KEGG:ath:AT1G32240,
1340	5	1	1	1	1	1	Replication protein A 14 kDa subunit B;, KEGG:ath:AT4G18590,
1341	8	2	2	1	1	2	Pectinesterase inhibitor 1 {ECO:0000305};, KEGG:ath:AT1G48020,
1342	2	1	1	0	0	0	None
1343	5	1	1	1	1	1	Probable galacturonosyltransferase-like 9;, KEGG:ath:AT1G70090,
1344	5	1	1	1	1	1	Elongator complex protein 2;, KEGG:ath:AT1G49540,
1345	6	2	0	1	2	1	None
1346	10	2	2	2	2	2	L-lactate dehydrogenase A;,
1347	5	1	1	1	1	1	NAC domain-containing protein 40 {ECO:0000303|PubMed:15029955};, KEGG:ath:AT2G27300,
1348	5	1	1	1	1	1	Protein LURP-one-related 15;, KEGG:ath:AT5G01750,
1349	4	1	1	0	1	1	WD repeat-containing protein 25;, KEGG:hsa:79446,
1350	5	1	1	1	1	1	NO-associated protein 1, chloroplastic/mitochondrial;, KEGG:ath:AT3G47450,
1351	10	2	2	2	2	2	Protein trichome birefringence-like 19;, KEGG:ath:AT5G15900,
1352	8	2	0	2	2	2	ABC transporter D family member 1 {ECO:0000303|PubMed:18299247};, KEGG:ath:AT4G39850,
1353	5	1	1	1	1	1	Short-chain dehydrogenase/reductase family 42E member 1 {ECO:0000250|UniProtKB:Q8WUS8};, KEGG:dre:565964,
1354	4	1	0	1	1	1	Probable serine/threonine-protein kinase PBL23 {ECO:0000305};, KEGG:ath:AT3G20530,
1355	5	4	0	0	0	1	None
1356	9	2	1	2	2	2	Pentatricopeptide repeat-containing protein At3g18970;, KEGG:ath:AT3G18970,
1357	5	1	1	1	1	1	Stem 28 kDa glycoprotein;, KEGG:gmx:547821,
1358	9	2	2	2	1	2	Probable calcium-binding protein CML15;, KEGG:ath:AT1G18530,
1359	5	1	1	1	1	1	26S proteasome non-ATPase regulatory subunit 1 homolog A;, KEGG:ath:AT2G32730,
1360	3	1	1	0	1	0	None
1361	5	1	1	1	1	1	Probable LRR receptor-like serine/threonine-protein kinase At1g51810;, KEGG:ath:AT1G51810,
1362	5	1	1	1	1	1	Histone acetyltransferase GCN5 {ECO:0000303|PubMed:11266554, ECO:0000303|PubMed:12615937};, KEGG:ath:AT3G54610,
1363	5	1	1	1	1	1	Probable E3 ubiquitin-protein ligase RHC2A {ECO:0000305};, KEGG:ath:AT2G39720,
1364	5	1	1	1	1	1	Beta-amyrin 28-monooxygenase;,
1365	15	3	3	3	3	3	Cinnamoyl-CoA reductase CAD2 {ECO:0000305|PubMed:25217505};,Phenylacetaldehyde reductase {ECO:0000303|PubMed:20650544};, KEGG:mtr:11427940,
1366	5	1	1	1	1	1	Naringenin,2-oxoglutarate 3-dioxygenase;,
1367	5	1	1	1	1	1	Serpin-ZX;, KEGG:ath:AT1G47710,
1368	5	1	1	1	1	1	Fructose-bisphosphate aldolase 6, cytosolic {ECO:0000305};, KEGG:ath:AT2G36460,
1369	15	2	6	2	2	3	Adenosine kinase 2 {ECO:0000303|PubMed:11115893};, KEGG:ath:AT5G03300,
1370	5	1	1	1	1	1	Carboxypeptidase SOL1;, KEGG:ath:AT1G71696,
1371	5	2	1	0	1	1	None
1372	3	1	1	0	0	1	None
1373	6	2	1	1	1	1	GPI inositol-deacylase;, KEGG:cim:CIMG_05264,
1374	5	1	1	1	1	1	None
1375	5	1	1	1	1	1	PI-PLC X domain-containing protein At5g67130;, KEGG:ath:AT5G67130,
1376	5	1	1	1	1	1	None
1377	5	1	1	1	1	1	Triacylglycerol lipase 1 {ECO:0000303|PubMed:16226259};, KEGG:ath:AT2G15230,
1378	5	1	1	1	1	1	None
1379	7	1	1	2	2	1	None
1380	5	1	1	1	1	1	AT-hook motif nuclear-localized protein 5 {ECO:0000312|EMBL:FAA00276.1};, KEGG:ath:AT1G63470,
1381	2	1	1	0	0	0	None
1382	5	1	1	1	1	1	Copper transporter 6;, KEGG:ath:AT2G26975,
1383	12	6	3	1	1	1	Pentatricopeptide repeat-containing protein At3g09040, mitochondrial;, KEGG:ath:AT3G09040,
1384	5	1	1	1	1	1	Pentatricopeptide repeat-containing protein At2g30780;, KEGG:ath:AT2G30780,
1385	14	3	2	3	3	3	Zinc finger Ran-binding domain-containing protein 2;, KEGG:gga:424717,
1386	5	1	1	1	1	1	Protein DETOXIFICATION 33 {ECO:0000303|PubMed:11739388};, KEGG:ath:AT1G47530,
1387	10	2	2	2	2	2	Dof zinc finger protein DOF5.4;, KEGG:ath:AT5G60850,
1388	10	2	2	2	2	2	Double-stranded RNA-binding protein 2;, KEGG:ath:AT2G28380,
1389	5	1	1	1	1	1	Carotenoid cleavage dioxygenase 8 homolog B, chloroplastic;, KEGG:osa:4326177,
1390	9	2	2	1	2	2	Importin-5;, KEGG:mmu:70572,KEGG:hsa:3843,
1391	9	2	2	2	2	1	None
1392	10	2	2	2	2	2	None
1393	7	2	2	0	2	1	None
1394	20	4	4	4	4	4	Aldehyde dehydrogenase family 2 member B4, mitochondrial;,Benzaldehyde dehydrogenase, mitochondrial {ECO:0000303|PubMed:19292760};, KEGG:ath:AT3G48000,
1395	9	2	2	2	1	2	Uncharacterized GPI-anchored protein At3g06035;, KEGG:ath:AT3G06035,
1396	5	1	1	1	1	1	Tyrosine--tRNA ligase 1, cytoplasmic {ECO:0000305};, KEGG:ath:AT2G33840,
1397	5	1	1	1	1	1	None
1398	5	1	1	1	1	1	None
1399	10	2	2	2	2	2	1-deoxy-D-xylulose 5-phosphate reductoisomerase, chloroplastic;, KEGG:ath:AT5G62790,KEGG:osa:4326153,
1400	5	1	1	1	1	1	Transcription factor bHLH157;,Transcription factor LHW;, KEGG:ath:AT2G27230,
1401	5	1	1	1	1	1	None
1402	5	1	1	1	1	1	Pleiotropic drug resistance protein 3;, KEGG:nta:107764055,KEGG:nta:107812050,
1403	5	1	1	1	1	1	1-acyl-sn-glycerol-3-phosphate acyltransferase;,
1404	5	1	1	1	1	1	ASI1-immunoprecipitated protein 1 {ECO:0000303|PubMed:28808009};, KEGG:ath:AT1G05970,
1405	10	2	2	2	2	2	None
1406	5	1	1	1	1	1	Peptidyl-prolyl cis-trans isomerase FKBP42;, KEGG:ath:AT3G21640,
1407	5	1	1	1	1	1	Phosphomethylpyrimidine synthase, chloroplastic;, KEGG:ath:AT2G29630,
1408	10	2	2	2	2	2	Protein OXIDATIVE STRESS 3 {ECO:0000303|PubMed:18980652};, KEGG:ath:AT5G56550,
1409	9	2	1	2	2	2	Myosin-7;,Myosin-6;,Myosin-8;, KEGG:ath:AT1G04160,KEGG:ath:AT1G04600,KEGG:ath:AT5G43900,
1410	10	2	2	2	2	2	Elicitor-responsive protein 1;,16 kDa phloem protein 1 {ECO:0000303|PubMed:29320165};, KEGG:ath:AT3G55470,KEGG:osa:4327497,
1411	15	3	3	3	3	3	AT-hook motif nuclear-localized protein 7 {ECO:0000312|EMBL:FAA00278.1};,AT-hook motif nuclear-localized protein 1 {ECO:0000303|PubMed:15604740};, KEGG:ath:AT4G12080,
1412	7	2	2	0	1	2	Large ribosomal subunit protein eL43 {ECO:0000305};,
1413	5	1	1	1	1	1	UDP-glycosyltransferase 76F1;, KEGG:ath:AT3G55700,
1414	4	1	1	0	1	1	Putative cytochrome c oxidase subunit 6b-like;, KEGG:ath:AT1G32710,
1415	5	1	1	1	1	1	Diacylglycerol lipase-alpha;, KEGG:rno:309207,
1416	13	3	3	2	2	3	Xyloglucan O-acetyltransferase 1 {ECO:0000303|PubMed:30083810};, KEGG:pop:7457851,
1417	5	1	1	1	1	1	None
1418	5	1	1	1	1	1	Two-pore potassium channel 3 {ECO:0000303|PubMed:16984403};, KEGG:ath:AT4G18160,
1419	8	2	0	2	2	2	Dirigent protein 16;,Dirigent protein 18;, KEGG:ath:AT3G24020,
1420	8	2	2	1	1	2	Zinc finger A20 and AN1 domain-containing stress-associated protein 4;, KEGG:ath:AT2G36320,
1421	5	1	1	1	1	1	Probable isoaspartyl peptidase/L-asparaginase 3;, KEGG:ath:AT5G61540,
1422	10	2	2	2	2	2	Aspartyl protease AED3 {ECO:0000303|PubMed:24755512};, KEGG:ath:AT1G09750,
1423	5	1	1	1	1	1	None
1424	5	1	1	1	1	1	Ammonium transporter 2 member 3 {ECO:0000303|PubMed:25841038};, KEGG:mtr:11444316,
1425	5	1	1	1	1	1	None
1426	5	1	1	1	1	1	Glutaredoxin-C1;, KEGG:osa:4325734,
1427	10	2	2	2	2	2	None
1428	4	1	1	0	1	1	Aquaporin SIP1-2;, KEGG:zma:541892,
1429	10	2	2	2	2	2	3-oxoacyl-[acyl-carrier-protein] synthase I, chloroplastic;, KEGG:ath:AT5G46290,
1430	5	1	1	1	1	1	Transmembrane emp24 domain-containing protein p24delta9;, KEGG:ath:AT1G26690,
1431	5	1	1	1	1	1	None
1432	3	1	1	0	0	1	None
1433	5	1	1	1	1	1	Protein LURP-one-related 6;, KEGG:ath:AT2G05910,
1434	5	1	1	1	1	1	Mediator of RNA polymerase II transcription subunit 22b;, KEGG:ath:AT1G07950,
1435	6	2	1	1	1	1	Uncharacterized aarF domain-containing protein kinase At1g71810, chloroplastic;, KEGG:ath:AT1G71810,
1436	5	1	1	1	1	1	None
1437	10	2	2	2	2	2	Syntaxin-124;,Syntaxin-125;, KEGG:ath:AT1G61290,
1438	2	1	1	0	0	0	None
1439	21	4	3	4	4	6	Peroxidase 5 {ECO:0000250|UniProtKB:P22195};,
1440	5	1	1	1	1	1	Glycerate dehydrogenase HPR, peroxisomal;, KEGG:ath:AT1G68010,
1441	6	2	1	1	1	1	Conserved oligomeric Golgi complex subunit 5 {ECO:0000303|PubMed:27448097};, KEGG:ath:AT1G67930,
1442	5	1	1	1	1	1	Putative ETHYLENE INSENSITIVE 3-like 4 protein;, KEGG:ath:AT5G10120,
1443	5	1	1	1	1	1	None
1444	5	1	1	1	1	1	ATP-dependent Clp protease proteolytic subunit 6, chloroplastic {ECO:0000303|PubMed:11299370};, KEGG:ath:AT1G11750,
1445	5	1	1	1	1	1	Pentatricopeptide repeat-containing protein At2g45350, chloroplastic;, KEGG:ath:AT2G45350,
1446	11	2	4	1	2	2	Probable peptide/nitrate transporter At3g43790;,Cytosolic sulfotransferase 15;, KEGG:ath:AT3G43790,KEGG:ath:AT5G07010,
1447	5	1	1	1	1	1	O-fucosyltransferase 38 {ECO:0000305};, KEGG:ath:AT5G64600,
1448	7	2	2	1	1	1	Protein PEP-RELATED DEVELOPMENT ARRESTED 1, chloroplastic {ECO:0000303|PubMed:24132784};, KEGG:ath:AT5G48470,
1449	8	2	2	1	1	2	Chloroplast envelope quinone oxidoreductase homolog {ECO:0000303|PubMed:20424175};, KEGG:ath:AT4G13010,
1450	5	1	1	1	1	1	Transcription factor bHLH49;, KEGG:ath:AT1G68920,
1451	5	1	1	1	1	1	SH3 domain-containing protein PJ696.02;, KEGG:spo:SPAPJ696.02,
1452	5	1	1	1	1	1	PAX-interacting protein 1;, KEGG:mmu:55982,KEGG:bta:513213,
1453	15	3	3	3	3	3	Calcium-transporting ATPase 2, plasma membrane-type;,Calcium-transporting ATPase 1;, KEGG:ath:AT1G27770,KEGG:ath:AT4G37640,
1454	5	1	1	1	1	1	Auxin efflux carrier component 2 {ECO:0000303|PubMed:9843496};, KEGG:ath:AT5G57090,
1455	11	3	2	2	2	2	Calcium-binding protein PBP1;, KEGG:ath:AT5G54490,
1456	5	1	1	1	1	1	Polygalacturonase At1g48100;, KEGG:ath:AT1G48100,
1457	5	1	1	1	1	1	E3 ubiquitin-protein ligase BIG BROTHER;, KEGG:ath:AT3G63530,
1458	19	4	4	4	3	4	Beta-galactosidase 3;,Beta-galactosidase 5;, KEGG:ath:AT4G36360,KEGG:ath:AT1G45130,
1459	10	2	2	2	2	2	V-type proton ATPase subunit C;, KEGG:ath:AT1G12840,
1460	19	9	2	1	2	5	Probable disease resistance protein At4g27220;,Disease resistance protein RPS2;, KEGG:ath:AT4G26090,KEGG:ath:AT4G27220,
1461	10	2	2	2	2	2	Guanylate kinase 2;, KEGG:ath:AT3G57550,
1462	5	1	1	1	1	1	F-box/LRR-repeat protein 4;,EIN3-binding F-box protein 1;, KEGG:ath:AT4G15475,
1463	10	2	2	2	2	2	Ribonuclease III domain-containing protein RNC1, chloroplastic {ECO:0000305};, KEGG:ath:AT4G37510,
1464	5	1	1	1	1	1	Heterogeneous nuclear ribonucleoprotein U-like protein 1;, KEGG:mmu:232989,KEGG:hsa:11100,
1465	10	2	2	2	2	2	Protein SUPPRESSOR OF PHYA-105 1;, KEGG:ath:AT2G46340,
1466	4	1	1	0	1	1	General negative regulator of transcription subunit 4;, KEGG:sce:YER068W,
1467	6	2	1	1	1	1	Regulation of nuclear pre-mRNA domain-containing protein 1A;,Regulation of nuclear pre-mRNA domain-containing protein 1B;, KEGG:pon:100172978,
1468	5	1	1	1	1	1	Meiotic recombination protein DMC1 homolog;, KEGG:gmx:548075,
1469	5	1	1	1	1	1	Uncharacterized protein At5g39865;, KEGG:ath:AT5G39865,
1470	4	1	0	1	1	1	ATP-dependent DNA helicase homolog RECG, chloroplastic {ECO:0000305};, KEGG:ath:AT2G01440,
1471	5	1	1	1	1	1	RING-H2 finger protein ATL7;, KEGG:ath:AT4G10150,
1472	10	2	2	2	2	2	None
1473	6	2	1	1	1	1	Histidine--tRNA ligase, chloroplastic/mitochondrial {ECO:0000305};, KEGG:ath:AT3G46100,
1474	5	1	1	1	1	1	Small ribosomal subunit protein bS1B {ECO:0000305};, KEGG:syn:slr1984,
1475	11	3	2	1	2	3	Thiol:disulfide interchange protein TxlA homolog;, KEGG:syn:sll1980,
1476	13	2	2	3	4	2	Transcription factor bHLH96;, KEGG:ath:AT1G72210,
1477	6	2	1	1	1	1	Zeaxanthin epoxidase, chloroplastic;,
1478	5	1	1	1	1	1	Small ribosomal subunit protein uS5c {ECO:0000303|PubMed:28007896};,
1479	10	2	2	2	2	2	Transcription factor E2FA;,Transcription factor E2FB;, KEGG:ath:AT2G36010,KEGG:ath:AT5G22220,
1480	5	1	1	1	1	1	Rab3 GTPase-activating protein non-catalytic subunit;, KEGG:mmu:98732,
1481	5	1	1	1	1	1	Coiled-coil domain-containing protein 22 homolog;, KEGG:cqu:CpipJ_CPIJ010681,
1482	5	1	1	1	1	1	Protein XRI1;, KEGG:ath:AT5G48720,
1483	18	4	5	3	3	3	Agamous-like MADS-box protein AGL14 {ECO:0000305};,MADS-box protein SOC1 {ECO:0000303|PubMed:15805477, ECO:0000303|PubMed:17428825, ECO:0000303|PubMed:18339670};,Agamous-like MADS-box protein AGL19;, KEGG:ath:AT4G22950,KEGG:ath:AT4G11880,KEGG:ath:AT2G45660,
1484	10	2	2	2	2	2	Protein ENHANCED DISEASE RESISTANCE 2;, KEGG:ath:AT4G19040,
1485	11	8	3	0	0	0	None
1486	10	2	2	2	2	2	None
1487	5	1	1	1	1	1	Pentatricopeptide repeat-containing protein At1g09220, mitochondrial;, KEGG:ath:AT1G09220,
1488	5	1	1	1	1	1	Probable glycosyltransferase At5g03795;, KEGG:ath:AT5G03795,
1489	19	4	3	4	4	4	Vestitone reductase;, KEGG:ag:AAB41550,
1490	5	1	1	1	1	1	None
1491	22	4	4	5	5	4	LRR receptor kinase BAK1 {ECO:0000305};,BRASSINOSTEROID INSENSITIVE 1-associated receptor kinase 1 {ECO:0000303|PubMed:12150929};,Somatic embryogenesis receptor kinase 2 {ECO:0000303|PubMed:11706164};,Somatic embryogenesis receptor kinase 1 {ECO:0000303|PubMed:11706164};, KEGG:ath:AT1G71830,KEGG:osa:4344785,KEGG:ath:AT4G33430,
1492	5	1	1	1	1	1	None
1493	6	3	3	0	0	0	None
1494	5	1	1	1	1	1	Alpha-aminoadipic semialdehyde synthase;, KEGG:ath:AT4G33150,
1495	11	2	2	3	2	2	None
1496	20	4	4	3	4	5	Phaseolin, beta-type;,Phaseolin;,Phaseolin, alpha-type;,
1497	5	1	1	1	1	1	Phosphatidylinositol 3,4,5-trisphosphate 3-phosphatase and protein-tyrosine-phosphatase PTEN1 {ECO:0000305};, KEGG:ath:AT5G39400,
1498	7	2	1	1	1	2	Ankyrin repeat-containing protein BDA1 {ECO:0000305};, KEGG:ath:AT5G54610,
1499	6	1	1	2	1	1	Protein C2-DOMAIN ABA-RELATED 4 {ECO:0000303|PubMed:25465408};, KEGG:ath:AT3G17980,
1500	5	1	1	1	1	1	Berberine bridge enzyme-like 19 {ECO:0000303|PubMed:26037923};,Berberine bridge enzyme-like 21 {ECO:0000303|PubMed:26037923};, KEGG:ath:AT4G20840,
1501	4	1	1	0	1	1	Cation/H(+) antiporter 4;, KEGG:ath:AT3G44900,
1502	20	4	3	4	5	4	Aldehyde dehydrogenase family 2 member C4;, KEGG:ath:AT3G24503,
1503	9	2	1	2	2	2	Pentatricopeptide repeat-containing protein At2g17525, mitochondrial;,Probable protein phosphatase 2C 47;, KEGG:ath:AT2G17525,KEGG:ath:AT3G51470,
1504	5	1	1	1	1	1	Mitogen-activated protein kinase kinase kinase 1;, KEGG:ath:AT4G08500,
1505	10	2	2	2	2	2	Putative E3 ubiquitin-protein ligase RING1a;, KEGG:ath:AT5G44280,
1506	9	2	2	1	2	2	Syntaxin-121 {ECO:0000303|PubMed:11718726};, KEGG:ath:AT3G11820,
1507	2	1	1	0	0	0	None
1508	5	1	1	1	1	1	None
1509	5	1	1	1	1	1	Transcription factor bHLH149;, KEGG:ath:AT1G09250,
1510	5	1	1	1	1	1	BRI1 kinase inhibitor 1;, KEGG:ath:AT5G42750,
1511	10	2	2	2	2	2	Probable glycosyltransferase At5g03795;, KEGG:ath:AT5G03795,
1512	5	1	1	1	1	1	None
1513	5	1	1	1	1	1	Phospholipase A2-alpha {ECO:0000303|PubMed:16140037};, KEGG:ath:AT2G06925,
1514	13	6	2	1	2	2	Probable nitronate monooxygenase;,Aldehyde dehydrogenase 22A1;, KEGG:ath:AT3G66658,KEGG:bsu:BSU26800,
1515	5	1	1	1	1	1	Tetratricopeptide repeat protein 4 homolog;, KEGG:ddi:DDB_G0286253,
1516	15	3	3	3	3	3	Rho GTPase-activating protein 1;, KEGG:ath:AT5G22400,
1517	10	2	2	2	2	2	Uncharacterized protein At2g37660, chloroplastic;, KEGG:ath:AT2G37660,
1518	7	2	2	1	1	1	Insulin-degrading enzyme-like 1, peroxisomal;, KEGG:ath:AT2G41790,
1519	5	1	1	1	1	1	None
1520	5	1	1	1	1	1	Peptidyl-prolyl cis-trans isomerase FKBP53;, KEGG:ath:AT4G25340,
1521	5	1	1	1	1	1	Mitochondrial carrier protein CoAc1 {ECO:0000305};, KEGG:ath:AT1G14560,
1522	5	1	1	1	1	1	DNA repair protein recA homolog 2, mitochondrial;, KEGG:ath:AT3G10140,
1523	5	1	1	1	1	1	None
1524	4	1	1	0	1	1	Aspartic proteinase CDR1;, KEGG:ath:AT5G33340,
1525	5	1	1	1	1	1	Septum site-determining protein minD homolog, chloroplastic {ECO:0000303|PubMed:11148270};, KEGG:ath:AT5G24020,
1526	5	1	1	1	1	1	None
1527	5	1	1	1	1	1	Peroxidase 3;, KEGG:ath:AT1G05260,
1528	9	2	1	2	2	2	Nipped-B-like protein B;,Small RNA binding protein 1 {ECO:0000303|PubMed:31812689};, KEGG:dre:794108,
1529	5	1	1	1	1	1	Transcription factor PCF3;,Transcription factor TCP20;,Transcription factor TCP19;, KEGG:ath:AT3G27010,KEGG:ath:AT5G51910,
1530	5	1	1	1	1	1	60S ribosome subunit biogenesis protein NIP7 homolog;, KEGG:xtr:100125143,
1531	3	1	1	0	0	1	DnaJ protein ERDJ7 {ECO:0000305};, KEGG:osa:4351914,
1532	5	1	1	1	1	1	Wee1-like protein kinase;, KEGG:ath:AT1G02970,
1533	5	1	1	1	1	1	Basic leucine zipper 23 {ECO:0000303|PubMed:11906833};, KEGG:ath:AT2G16770,
1534	4	1	1	0	1	1	None
1535	4	1	1	1	1	0	None
1536	10	2	2	2	2	2	Protein kinase STUNTED {ECO:0000303|PubMed:22492352};, KEGG:ath:AT2G16750,
1537	5	1	1	1	1	1	Phenylacetaldehyde oxime monooxygenase CYP71AN24 {ECO:0000303|PubMed:25015725};,
1538	5	1	1	1	1	1	CBL-interacting serine/threonine-protein kinase 25;, KEGG:ath:AT5G25110,
1539	5	1	1	1	1	1	5'-3' exonuclease PLD3;, KEGG:xla:398831,
1540	10	2	2	2	2	2	Probable apyrase 7;, KEGG:ath:AT4G19180,
1541	5	1	1	1	1	1	Wall-associated receptor kinase-like 20;, KEGG:ath:AT5G02070,
1542	4	1	0	1	1	1	Pentatricopeptide repeat-containing protein At1g52640, mitochondrial;, KEGG:ath:AT1G52640,
1543	5	1	1	1	1	1	Uridine nucleosidase 1 {ECO:0000303|PubMed:19293370};, KEGG:ath:AT2G36310,
1544	5	1	1	1	1	1	Bifunctional bis(5'-adenosyl)-triphosphatase/adenylylsulfatase FHIT {ECO:0000305|PubMed:18694747};, KEGG:ath:AT5G58240,
1545	10	2	2	2	2	2	3beta,22alpha-dihydroxysteroid 3-dehydrogenase {ECO:0000305};, KEGG:ath:AT5G05690,
1546	5	1	1	1	1	1	Calmodulin binding protein PICBP {ECO:0000305};, KEGG:ath:AT5G04020,
1547	4	1	1	1	1	0	Granule-bound starch synthase 1, chloroplastic/amyloplastic;,
1548	5	1	1	1	1	1	Heavy metal-associated isoprenylated plant protein 36 {ECO:0000303|PubMed:21072340, ECO:0000303|PubMed:23368984};,Heavy metal-associated isoprenylated plant protein 32 {ECO:0000303|PubMed:21072340, ECO:0000303|PubMed:23368984};, KEGG:ath:AT3G06130,KEGG:ath:AT5G27690,
1549	6	2	1	1	1	1	GATA transcription factor 10;,GATA transcription factor 11;, KEGG:ath:AT1G08010,KEGG:ath:AT1G08000,
1550	21	5	4	1	5	6	Cytochrome P450 71AU50 {ECO:0000303|PubMed:25015725};,Cytochrome P450 CYP736A12;,
1551	5	1	1	1	1	1	Fasciclin-like arabinogalactan protein 4;, KEGG:ath:AT3G46550,
1552	5	1	1	1	1	1	Electron transfer flavoprotein subunit alpha, mitochondrial;, KEGG:ath:AT1G50940,
1553	5	1	1	1	1	1	None
1554	2	1	1	0	0	0	None
1555	5	1	1	1	1	1	None
1556	10	2	2	2	2	2	Sterol 3-beta-glucosyltransferase UGT80A2;, KEGG:ath:AT3G07020,
1557	9	2	2	1	2	2	Uncharacterized isomerase BH0283;, KEGG:bha:BH0283,
1558	8	3	2	1	1	1	Probable carboxylesterase 13;,Probable carboxylesterase 2;, KEGG:ath:AT3G48700,KEGG:ath:AT1G47480,
1559	10	2	2	2	2	2	Expansin-B3;, KEGG:ath:AT4G28250,
1560	20	4	4	4	4	4	Ubiquitin-conjugating enzyme E2 5;,Ubiquitin-conjugating enzyme E2 4;, KEGG:ath:AT5G41340,KEGG:ath:AT1G63800,
1561	14	2	2	3	5	2	Probable LRR receptor-like serine/threonine-protein kinase At3g47570;,Probable inactive leucine-rich repeat receptor-like protein kinase At1g66830;, KEGG:ath:AT1G66830,KEGG:ath:AT3G47570,
1562	5	1	1	1	1	1	None
1563	5	1	1	1	1	1	WD repeat-containing protein 75;, KEGG:dre:368478,
1564	10	2	2	2	2	2	Protein phosphatase 2C 29;, KEGG:ath:AT2G35350,
1565	5	1	1	1	1	1	Ethylene-insensitive protein 2.2 {ECO:0000303|PubMed:35700212};,
1566	5	1	1	1	1	1	Probable plastid-lipid-associated protein 11, chloroplastic;, KEGG:ath:AT4G00030,
1567	5	1	1	1	1	1	L-type lectin-domain containing receptor kinase IX.1 {ECO:0000303|PubMed:19773388};, KEGG:ath:AT5G10530,
1568	36	7	7	7	8	7	Probable NAD(P)H dehydrogenase (quinone) FQR1-like 1 {ECO:0000305};,NAD(P)H dehydrogenase (quinone) FQR1 {ECO:0000305};, KEGG:ath:AT5G54500,KEGG:ath:AT4G27270,
1569	5	1	1	1	1	1	Actin-related protein 6;, KEGG:ath:AT3G33520,
1570	5	1	1	1	1	1	Transcription factor bHLH123;,Transcription factor bHLH112;, KEGG:ath:AT1G61660,
1571	14	3	2	3	3	3	Protein NRT1/ PTR FAMILY 1.2;, KEGG:ath:AT1G52190,
1572	4	1	1	0	1	1	Ethylene-responsive transcription factor RAP2-11;, KEGG:ath:AT5G19790,
1573	5	1	1	1	1	1	Disease resistance RPP13-like protein 4;, KEGG:ath:AT3G50950,
1574	5	1	1	1	1	1	Monodehydroascorbate reductase;,
1575	5	1	1	1	1	1	GATA transcription factor 16;,GATA transcription factor 21 {ECO:0000303|PubMed:15084732};,Putative GATA transcription factor 22 {ECO:0000303|PubMed:17208962};, KEGG:ath:AT4G26150,
1576	2	1	0	0	0	1	Putative disease resistance RPP13-like protein 1;, KEGG:ath:AT3G14470,
1577	5	1	1	1	1	1	Protein MAINTENANCE OF PSII UNDER HIGH LIGHT 1 {ECO:0000303|PubMed:25846821};, KEGG:ath:AT5G07020,
1578	15	3	2	2	6	2	Phenylacetaldehyde oxime monooxygenase CYP71AN24 {ECO:0000303|PubMed:25015725};,Cytochrome P450 71A1;,
1579	10	2	2	2	2	2	OBERON-like protein;,
1580	4	1	1	0	1	1	UPF0481 protein At3g47200;, KEGG:ath:AT3G47200,
1581	23	8	12	1	1	1	None
1582	11	2	2	2	2	3	Probable beta-D-xylosidase 7;, KEGG:ath:AT1G78060,
1583	5	1	1	1	1	1	Glucan endo-1,3-beta-glucosidase;,
1584	27	5	4	4	4	10	Myosin-15;,LRR receptor-like serine/threonine-protein kinase ERECTA {ECO:0000303|PubMed:8624444};, KEGG:ath:AT4G33200,KEGG:ath:AT2G26330,
1585	25	6	5	5	3	6	Putative invertase inhibitor;,Pectinesterase inhibitor;,
1586	5	1	1	1	1	1	Serine/threonine-protein phosphatase PP-X isozyme 2;, KEGG:ath:AT5G55260,
1587	5	1	1	1	1	1	Multiple organellar RNA editing factor 1, mitochondrial {ECO:0000305};, KEGG:ath:AT4G20020,
1588	20	7	7	2	2	2	Paired amphipathic helix protein Sin3-like 4;,Paired amphipathic helix protein Sin3-like 2;,Paired amphipathic helix protein Sin3-like 1;, KEGG:ath:AT1G70060,KEGG:ath:AT3G01320,
1589	11	2	2	2	2	3	Tropinone reductase homolog At5g06060 {ECO:0000305};, KEGG:ath:AT5G06060,
1590	9	2	1	2	2	2	Anthocyanidin reductase ((2S)-flavan-3-ol-forming) {ECO:0000250|UniProtKB:Q5FB34};,
1591	5	1	1	1	1	1	WAT1-related protein At5g07050;, KEGG:ath:AT5G07050,
1592	5	1	1	1	1	1	Protein IQ-DOMAIN 31 {ECO:0000303|PubMed:16368012};, KEGG:ath:AT1G74690,
1593	5	1	1	1	1	1	Transcriptional regulator SUPERMAN;,Zinc finger protein 10 {ECO:0000305};, KEGG:ath:AT3G23130,
1594	10	2	2	2	2	2	DeSI-like protein At4g17486;, KEGG:ath:AT4G17486,
1595	5	1	1	1	1	1	Organ-specific protein S2;,
1596	10	2	2	2	2	2	Probable carboxylesterase 11;, KEGG:ath:AT3G27320,
1597	5	1	1	1	1	1	Pentatricopeptide repeat-containing protein CRR2, chloroplastic {ECO:0000305};, KEGG:ath:AT3G46790,
1598	5	1	1	1	1	1	Sister chromatid cohesion protein PDS5 homolog B {ECO:0000305};, KEGG:ath:AT1G77600,
1599	10	1	1	2	3	3	Putative uncharacterized protein ycf15;,
1600	5	1	1	1	1	1	Blue-light photoreceptor PHR2;, KEGG:ath:AT2G47590,
1601	10	2	2	2	2	2	Protein SODIUM POTASSIUM ROOT DEFECTIVE 1 {ECO:0000303|PubMed:21193571};,Protein SODIUM POTASSIUM ROOT DEFECTIVE 3 {ECO:0000303|PubMed:21193571};, KEGG:ath:AT3G53530,KEGG:ath:AT5G02600,
1602	5	1	1	1	1	1	Embryogenesis-associated protein EMB8;,
1603	15	4	2	3	3	3	Mitochondrial phosphate carrier protein 3, mitochondrial;, KEGG:ath:AT5G14040,
1604	10	2	2	2	2	2	BEL1-like homeodomain protein 4;,BEL1-like homeodomain protein 2;, KEGG:ath:AT4G36870,
1605	5	1	1	1	1	1	Protein transport protein SEC24 C {ECO:0000303|PubMed:25315606, ECO:0000303|PubMed:27317568};, KEGG:ath:AT4G32640,
1606	8	2	1	1	2	2	Subtilisin-like protease Glyma18g48580;,
1607	3	1	1	0	0	1	Germin-like protein subfamily 1 member 1;, KEGG:ath:AT1G10460,
1608	8	1	1	3	2	1	Protein NONRESPONDING TO OXYLIPINS 2, mitochondrial {ECO:0000303|PubMed:17369372, ECO:0000303|PubMed:23370715};, KEGG:ath:AT5G11630,
1609	5	1	1	1	1	1	BTB/POZ domain-containing protein POB1;,BTB/POZ domain-containing protein At2g46260;, KEGG:ath:AT3G61600,KEGG:ath:AT2G46260,
1610	5	1	1	1	1	1	Protein PIN-LIKES 6 {ECO:0000303|PubMed:22504182};, KEGG:ath:AT5G01990,
1611	12	3	2	2	2	3	WAT1-related protein At3g30340;, KEGG:ath:AT3G30340,
1612	8	1	1	2	2	2	F-box protein SKIP8;, KEGG:ath:AT4G10925,
1613	5	1	1	1	1	1	Uncharacterized protein At5g41620;, KEGG:ath:AT5G41620,
1614	15	3	3	3	3	3	CLP protease regulatory subunit CLPX1, mitochondrial {ECO:0000303|PubMed:11299370};,CLP protease regulatory subunit CLPX3, mitochondrial {ECO:0000303|Ref.4};, KEGG:ath:AT1G33360,KEGG:ath:AT5G53350,
1615	6	2	1	1	1	1	Carotenoid 9,10(9',10')-cleavage dioxygenase 1;,
1616	10	2	2	2	2	2	Transcription repressor OFP6;, KEGG:ath:AT3G52525,
1617	5	1	1	1	1	1	La-related protein 1C;,La-related protein 1B;, KEGG:ath:AT4G35890,
1618	10	2	2	2	2	2	Kinesin-like protein KIN-14A {ECO:0000305};,Kinesin-like protein KIN-14B {ECO:0000305};, KEGG:ath:AT5G10470,KEGG:ath:AT5G65460,
1619	25	5	5	5	5	5	V-type proton ATPase 16 kDa proteolipid subunit;, KEGG:vra:106780537,
1620	5	1	1	1	1	1	None
1621	10	2	2	2	2	2	Protein NRT1/ PTR FAMILY 3.1;, KEGG:ath:AT1G68570,
1622	15	3	3	2	4	3	Amine oxidase [copper-containing] alpha 2, peroxisomal {ECO:0000303|PubMed:31862580};, KEGG:ath:AT1G31690,
1623	17	3	3	4	4	3	SNARE-interacting protein KEULE;,Protein transport Sec1a;, KEGG:ath:AT1G02010,KEGG:ath:AT1G12360,
1624	5	1	1	1	1	1	Branched-chain amino acid aminotransferase 2, chloroplastic {ECO:0000303|PubMed:23347725};,
1625	10	2	2	2	2	2	Large ribosomal subunit protein bL12m {ECO:0000303|PubMed:33056988};,Large ribosomal subunit protein bL12 {ECO:0000255|HAMAP-Rule:MF_00368};, KEGG:cli:Clim_0195,
1626	5	1	1	1	1	1	BAG family molecular chaperone regulator 3;, KEGG:ath:AT5G07220,
1627	8	2	1	2	2	1	WAT1-related protein At5g40240;,WAT1-related protein At3g28050;, KEGG:ath:AT5G40240,
1628	5	1	1	1	1	1	piRNA biogenesis protein EXD1 {ECO:0000305};, KEGG:mmu:241624,
1629	5	1	1	1	1	1	Protein RESPONSE TO LOW SULFUR 2 {ECO:0000303|PubMed:25628631};,Protein RESPONSE TO LOW SULFUR 3 {ECO:0000303|PubMed:25628631};, KEGG:ath:AT5G24660,
1630	9	2	1	2	2	2	Eukaryotic translation initiation factor 3 subunit C {ECO:0000255|HAMAP-Rule:MF_03002};, KEGG:mtr:11419223,
1631	10	2	2	2	2	2	BTB/POZ domain-containing protein At5g47800;, KEGG:ath:AT5G47800,
1632	5	1	1	1	1	1	Protein SAR DEFICIENT 1 {ECO:0000303|PubMed:20921422};, KEGG:ath:AT1G73805,
1633	5	1	1	1	1	1	RING-H2 finger protein ATL13;, KEGG:ath:AT4G30400,
1634	4	1	1	0	1	1	Transcription termination factor MTEF1, chloroplastic {ECO:0000305};, KEGG:ath:AT2G03050,
1635	2	1	1	0	0	0	None
1636	5	1	1	1	1	1	Protein SUPPRESSOR OF FRI 4 {ECO:0000303|PubMed:17079264};, KEGG:ath:AT1G30970,
1637	5	1	1	1	1	1	None
1638	5	1	1	1	1	1	Kinesin-like protein KIN-7F {ECO:0000305};, KEGG:osa:4336528,
1639	10	5	2	0	0	3	Repetitive proline-rich cell wall protein 1;,Repetitive proline-rich cell wall protein 2;, KEGG:gmx:547830,
1640	5	1	1	1	1	1	Pentatricopeptide repeat-containing protein At5g67570, chloroplastic;, KEGG:ath:AT5G67570,
1641	5	1	1	1	1	1	Actin-interacting protein 1-2 {ECO:0000303|PubMed:12417710};, KEGG:ath:AT3G18060,
1642	5	1	1	1	1	1	None
1643	5	1	1	1	1	1	UMP-CMP kinase {ECO:0000255|HAMAP-Rule:MF_03172};,
1644	5	1	1	1	1	1	None
1645	17	4	2	4	4	3	Uncharacterized oxidoreductase At1g06690, chloroplastic;,Flagellar radial spoke protein 5 {ECO:0000303|PubMed:16507594};, KEGG:ath:AT1G06690,
1646	10	2	2	2	2	2	Phosphoinositide phosphatase SAC7;, KEGG:ath:AT3G51460,
1647	5	1	1	1	1	1	None
1648	49	10	11	9	10	9	PHD finger protein ALFIN-LIKE 5;,PHD finger protein ALFIN-LIKE 1;,PHD finger protein Alfin1;,PHD finger protein ALFIN-LIKE 3;, KEGG:ath:AT5G05610,KEGG:ath:AT5G20510,KEGG:osa:4337899,
1649	10	2	2	2	2	2	DeSI-like protein At4g17486;, KEGG:ath:AT4G17486,
1650	10	2	2	2	2	2	Ribonucleoside-diphosphate reductase large subunit {ECO:0000303|PubMed:10542051};, KEGG:ath:AT2G21790,
1651	5	1	1	1	1	1	Protein NODULATION SIGNALING PATHWAY 1 {ECO:0000303|PubMed:17071642};,Protein NODULATION SIGNALING PATHWAY 1 {ECO:0000303|PubMed:15961669};, KEGG:mtr:11434050,
1652	11	3	1	2	2	3	UDP-glycosyltransferase 79B30 {ECO:0000303|PubMed:26002063};,Cyanidin 3-O-galactoside 2''-O-xylosyltransferase FGGT1 {ECO:0000305};,
1653	5	1	1	1	1	1	Leucine-rich repeat receptor protein kinase EMS1 {ECO:0000305};, KEGG:ath:AT5G07280,
1654	9	1	1	3	3	1	Small RNA degrading nuclease 3;,Small RNA degrading nuclease 1;, KEGG:ath:AT3G50100,KEGG:ath:AT5G67240,
1655	5	1	1	1	1	1	C-signal {ECO:0000303|PubMed:1372277};,1-hydroxy-2-glutathionyl-2-methyl-3-butene dehydrogenase {ECO:0000305};,Uncharacterized oxidoreductase C663.09c;, KEGG:spo:SPCC663.09c,KEGG:ag:CAB55822,
1656	22	4	4	3	5	6	Cytochrome P450 71A3;,Cytochrome P450 736A117 {ECO:0000303|PubMed:25015725};,Cytochrome P450 71A8;,
1657	8	2	2	1	1	2	None
1658	5	1	1	1	1	1	ABSCISIC ACID-INSENSITIVE 5-like protein 2;, KEGG:ath:AT3G56850,
1659	5	2	2	0	0	1	None
1660	5	1	1	1	1	1	tRNA pseudouridine synthase A 1 {ECO:0000255|HAMAP-Rule:MF_00171};, KEGG:pcu:PC_RS01600,
1661	9	2	2	1	2	2	Alpha-soluble NSF attachment protein 2;, KEGG:ath:AT3G56190,
1662	15	3	3	3	3	3	Protein RGF1 INDUCIBLE TRANSCRIPTION FACTOR 1 {ECO:0000303|PubMed:31801996};, KEGG:ath:AT2G12646,
1663	5	1	1	1	1	1	Aspartic proteinase PCS1;, KEGG:ath:AT5G02190,
1664	12	5	2	1	2	2	Protein MAK16 homolog A;,Protein mak16;, KEGG:spo:SPAC222.06,
1665	14	3	3	2	3	3	Probable indole-3-pyruvate monooxygenase YUCCA8;, KEGG:ath:AT4G28720,
1666	10	2	2	2	2	2	Serine/threonine protein phosphatase 2A 57 kDa regulatory subunit B' kappa isoform;, KEGG:ath:AT5G25510,
1667	15	3	3	3	3	3	Isocitrate dehydrogenase [NADP], chloroplastic/mitochondrial;,Isocitrate dehydrogenase [NADP];, KEGG:ath:AT5G14590,KEGG:nta:107815853,
1668	25	5	5	5	5	5	Ferritin, chloroplastic;,Ferritin-3, chloroplastic;,Ferritin-2, chloroplastic;, KEGG:gmx:547476,KEGG:pvu:PHAVU_008G093700g,
1669	5	1	1	1	1	1	Transcription factor MYB73 {ECO:0000303|PubMed:11597504};, KEGG:ath:AT4G37260,
1670	5	1	1	1	1	1	Terminal nucleotidyltransferase 4B {ECO:0000305};, KEGG:hsa:64282,
1671	5	1	1	1	1	1	U-box domain-containing protein 15;, KEGG:ath:AT5G42340,
1672	5	1	1	1	1	1	None
1673	5	1	1	1	1	1	Vacuolar protein sorting-associated protein 25;, KEGG:ath:AT4G19003,
1674	9	2	1	2	2	2	AAA-ATPase At2g18193;,AAA-ATPase At5g17760;, KEGG:ath:AT2G18193,KEGG:ath:AT5G17760,
1675	5	1	1	1	1	1	APO protein 4, mitochondrial;, KEGG:ath:AT3G21740,
1676	10	2	2	1	2	3	None
1677	18	3	3	4	4	4	Small ribosomal subunit protein uS12 {ECO:0000305};,
1678	10	2	1	5	1	1	Photosystem I P700 chlorophyll a apoprotein A1 {ECO:0000255|HAMAP-Rule:MF_00458};, KEGG:pvu:PhvuCp14,
1679	5	1	1	1	1	1	Phytosulfokine receptor 2;, KEGG:ath:AT5G53890,
1680	5	1	1	1	1	1	Flowering time control protein FY;, KEGG:ath:AT5G13480,
1681	10	2	2	2	2	2	Peroxidase 66;, KEGG:ath:AT5G51890,
1682	5	1	1	1	1	1	Aladin {ECO:0000303|PubMed:21189294};, KEGG:ath:AT3G56900,
1683	14	3	3	2	2	4	Monooxygenase 3 {ECO:0000303|PubMed:10216258};, KEGG:ath:AT5G05320,
1684	27	7	4	2	7	7	Protein NRT1/ PTR FAMILY 5.6;,Protein NRT1/ PTR FAMILY 5.7;, KEGG:ath:AT2G37900,KEGG:ath:AT3G53960,
1685	18	4	4	2	4	4	Beta-galactosidase 13;, KEGG:ath:AT2G16730,
1686	10	2	2	2	2	2	Beta-xylosidase/alpha-L-arabinofuranosidase 1 {ECO:0000303|PubMed:17615411, ECO:0000312|EMBL:ABQ45227.1};,Beta-xylosidase/alpha-L-arabinofuranosidase 2 {ECO:0000303|PubMed:17615411, ECO:0000312|EMBL:ABQ45228.1};,
1687	11	2	3	2	2	2	Probable protein phosphatase 2C 42 {ECO:0000303|PubMed:19021904};, KEGG:ath:AT3G17090,
1688	2	1	1	0	0	0	None
1689	12	2	3	2	2	3	None
1690	5	1	1	1	1	1	IAA-amino acid hydrolase ILR1-like 6 {ECO:0000303|PubMed:11923288};, KEGG:ath:AT1G44350,
1691	49	17	5	12	4	11	Replication protein A 70 kDa DNA-binding subunit A;,Replication protein A 70 kDa DNA-binding subunit C;,Probable replication factor A 73 kDa subunit;, KEGG:cel:CELE_F18A1.5,KEGG:osa:4337594,
1692	20	4	4	4	4	4	Serine/threonine-protein kinase PBL34 {ECO:0000303|PubMed:29907700};, KEGG:ath:AT5G15080,
1693	10	2	2	1	3	2	Pentatricopeptide repeat-containing protein At5g02860;, KEGG:ath:AT5G02860,
1694	7	1	1	2	2	1	BTB/POZ domain-containing protein FBL11;, KEGG:ath:AT2G36370,
1695	5	1	1	1	1	1	Beta-amylase;, KEGG:gmx:547931,
1696	10	2	2	2	2	2	Protein BREVIS RADIX {ECO:0000303|PubMed:15031265};, KEGG:ath:AT1G31880,
1697	5	1	1	1	1	1	Probable transmembrane ascorbate ferrireductase 3;, KEGG:ath:AT1G14730,
1698	5	1	1	1	1	1	RING-H2 finger protein ATL33;, KEGG:ath:AT2G37580,
1699	5	2	1	0	1	1	Phosphoglucan phosphatase DSP4, amyloplastic {ECO:0000250|UniProtKB:Q9FEB5};,
1700	5	1	1	1	1	1	Plant UBX domain-containing protein 10 {ECO:0000303|Ref.4};, KEGG:ath:AT4G10790,
1701	4	1	1	0	1	1	U-box domain-containing protein 19;, KEGG:ath:AT1G60190,
1702	10	2	2	2	2	2	Homeobox-leucine zipper protein HAT2;,Homeobox-leucine zipper protein HAT4;, KEGG:ath:AT5G47370,KEGG:ath:AT4G16780,
1703	5	1	1	1	1	1	Dual specificity protein phosphatase 1;, KEGG:ath:AT3G23610,
1704	12	3	2	2	2	3	Small ribosomal subunit protein eS12 {ECO:0000305};,
1705	9	2	1	2	3	1	Sorting nexin-14;,Sorting nexin-16;, KEGG:mmu:244962,KEGG:mmu:74718,
1706	10	2	2	2	2	2	Protein ENHANCED DISEASE RESISTANCE 2-like;, KEGG:ath:AT5G45560,
1707	5	1	1	1	1	1	Co-chaperone protein p23-1 {ECO:0000305};,
1708	20	5	4	2	4	5	None
1709	4	1	1	0	1	1	Leucine-rich repeat receptor-like protein kinase PXC1 {ECO:0000305};, KEGG:ath:AT2G36570,
1710	5	1	1	1	1	1	AUGMIN subunit 1 {ECO:0000303|PubMed:22505726};, KEGG:ath:AT2G41350,
1711	10	2	2	2	2	2	Probable calcium-binding protein CML27;, KEGG:ath:AT1G18210,
1712	11	2	2	2	3	2	Patatin-like protein 2;, KEGG:ath:AT2G26560,
1713	13	5	3	1	3	1	LEAF RUST 10 DISEASE-RESISTANCE LOCUS RECEPTOR-LIKE PROTEIN KINASE-like 1.3 {ECO:0000303|PubMed:12805585};,LEAF RUST 10 DISEASE-RESISTANCE LOCUS RECEPTOR-LIKE PROTEIN KINASE-like 1.4 {ECO:0000303|PubMed:12805585};, KEGG:ath:AT5G38210,KEGG:ath:AT1G66880,
1714	5	1	1	1	1	1	Potassium transporter 2;, KEGG:ath:AT2G40540,
1715	13	2	2	3	3	3	RNA-binding protein pno1;, KEGG:nve:5518945,
1716	17	4	3	3	3	4	Large ribosomal subunit protein uL2x {ECO:0000303|PubMed:36423343};, KEGG:ath:AT4G36130,
1717	5	1	1	1	1	1	2-dehydro-3-deoxy-phosphogluconate aldolase {ECO:0000305};,KHG/KDPG aldolase;, KEGG:bsu:BSU22100,
1718	15	3	3	3	3	3	Plastidial pyruvate kinase 2;,Pyruvate kinase isozyme G, chloroplastic;, KEGG:nta:107822892,KEGG:ath:AT5G52920,
1719	14	3	3	3	3	2	Large ribosomal subunit protein eL27 {ECO:0000305};,
1720	10	2	2	2	2	2	Zinc finger CCCH domain-containing protein ZFN-like;,
1721	5	1	1	1	1	1	Single-stranded DNA-binding protein WHY1, chloroplastic;, KEGG:ath:AT1G14410,
1722	4	1	0	1	1	1	F-box protein At3g44326;,F-box protein At2g27310;, KEGG:ath:AT2G27310,
1723	30	3	8	3	4	12	Adhesion G protein-coupled receptor E2;, KEGG:mcc:654420,
1724	5	1	1	1	1	1	Transposon Tf2-9 polyprotein;,5'-3' exonuclease;, KEGG:aae:aq_1628,
1725	3	1	0	0	1	1	Large ribosomal subunit protein uL3m {ECO:0000303|PubMed:36423343};, KEGG:ath:AT3G17465,
1726	2	2	0	0	0	0	None
1727	5	1	1	1	1	1	Organelle RRM domain-containing protein 2, mitochondrial {ECO:0000303|PubMed:25800738};, KEGG:ath:AT5G54580,
1728	5	1	1	1	1	1	Ubiquitin carboxyl-terminal hydrolase 27;, KEGG:ath:AT4G39370,
1729	5	1	1	1	1	1	None
1730	5	1	1	1	1	1	Plant cysteine oxidase 5 {ECO:0000303|PubMed:24599061};, KEGG:ath:AT3G58670,
1731	7	2	1	1	1	2	Transcription factor bHLH144;, KEGG:ath:AT1G29950,
1732	15	3	3	3	3	3	GDSL esterase/lipase At5g33370;, KEGG:ath:AT5G33370,
1733	14	3	2	3	3	3	17.9 kDa class II heat shock protein;,17.1 kDa class II heat shock protein;,
1734	5	1	1	1	1	1	Derlin-1;, KEGG:ath:AT4G29330,
1735	5	1	1	1	1	1	Uncharacterized protein At5g08430;, KEGG:ath:AT5G08430,
1736	10	2	2	2	2	2	Reticulon-like protein B1;,Reticulon-like protein B5;, KEGG:ath:AT2G46170,
1737	5	1	1	1	1	1	Flavonol 7-O-beta-glucosyltransferase UGT74F1 {ECO:0000305};, KEGG:ath:AT2G43840,
1738	28	4	6	6	6	6	Probable xyloglucan endotransglucosylase/hydrolase protein 26;,Casein kinase 1-like protein 4 {ECO:0000305};,Casein kinase 1-like protein 3 {ECO:0000305};, KEGG:ath:AT4G28880,KEGG:ath:AT4G28850,KEGG:ath:AT4G28860,
1739	4	1	1	0	1	1	Probable WRKY transcription factor 70 {ECO:0000303|Ref.1};, KEGG:ath:AT3G56400,
1740	7	3	1	1	1	1	RNA polymerase II subunit 5-mediating protein homolog;, KEGG:ddi:DDB_G0289477,
1741	10	2	2	2	2	2	Rab3 GTPase-activating protein catalytic subunit;, KEGG:xla:447515,
1742	10	2	2	2	2	2	Protein ASPARTIC PROTEASE IN GUARD CELL 2;, KEGG:ath:AT3G20015,
1743	29	6	3	9	8	3	Agamous-like MADS-box protein AGL17;,Agamous-like MADS-box protein AGL16;,MADS-box transcription factor 23;,MADS-box transcription factor 27;,MADS-box transcription factor ANR1;, KEGG:ath:AT2G14210,KEGG:ath:AT3G57230,KEGG:osa:4329771,KEGG:ath:AT2G22630,
1744	14	2	2	4	3	3	Peroxidase 53;,Peroxidase 15 {ECO:0000303|PubMed:17936696};, KEGG:ath:AT5G06720,
1745	8	1	1	2	2	2	U11/U12 small nuclear ribonucleoprotein 25 kDa protein;,ATP synthase subunit b', chloroplastic;, KEGG:ath:AT3G07860,
1746	5	1	1	1	1	1	Aspartic proteinase 36 {ECO:0000303|PubMed:27872247};, KEGG:ath:AT5G36260,
1747	4	1	0	1	1	1	Fasciclin-like arabinogalactan protein 11;, KEGG:ath:AT5G03170,
1748	27	4	6	5	6	6	UDP-rhamnose/UDP-galactose transporter 5 {ECO:0000312|EMBL:AKA88218.1};,UDP-rhamnose/UDP-galactose transporter 4 {ECO:0000312|EMBL:AKA88217.1};,Small nuclear ribonucleoprotein SmD3b {ECO:0000305};,Mediator of RNA polymerase II transcription subunit 28 {ECO:0000303|PubMed:17560376};, KEGG:ath:AT4G09810,KEGG:ath:AT4G39390,KEGG:ath:AT3G52860,KEGG:ath:AT1G20580,
1749	5	1	1	1	1	1	Protein GLUTAMINE DUMPER 3;, KEGG:ath:AT5G57685,
1750	11	2	3	2	2	2	bZIP transcription factor 16 {ECO:0000305};, KEGG:ath:AT2G35530,
1751	5	1	1	1	1	1	None
1752	6	2	1	1	1	1	Indole-3-acetic acid-induced protein ARG7;,
1753	5	1	1	1	1	1	None
1754	5	1	1	1	1	1	DExH-box ATP-dependent RNA helicase DExH18, mitochondrial {ECO:0000305};, KEGG:ath:AT5G39840,
1755	5	1	1	1	1	1	Protein DOWNSTREAM OF FLC;,Olee1-like protein;, KEGG:ath:AT5G10130,
1756	6	2	2	0	1	1	6,7,8-trihydroxycoumarin synthase {ECO:0000303|PubMed:29971079};,5-OH-xanthotoxin synthase {ECO:0000303|PubMed:29971079};, KEGG:ag:AXB38863,
1757	5	1	1	1	1	1	Tobamovirus multiplication protein 1;, KEGG:ath:AT4G21790,
1758	6	3	0	1	1	1	Glycosyl hydrolase 5 family protein {ECO:0000303|PubMed:27237746};,
1759	3	1	1	0	0	1	Probable cadmium/zinc-transporting ATPase HMA1, chloroplastic;, KEGG:ath:AT4G37270,
1760	5	1	1	1	1	1	Homeobox-leucine zipper protein ATHB-7;, KEGG:ath:AT2G46680,
1761	10	2	2	2	2	2	Sulfate transporter 3.1;, KEGG:ath:AT3G51895,
1762	2	1	1	0	0	0	None
1763	8	1	0	2	2	3	S-protein homolog 2 {ECO:0000303|PubMed:10344198};, KEGG:ath:AT4G16195,
1764	5	1	1	1	1	1	Autophagy-related protein 18f;, KEGG:ath:AT5G54730,
1765	5	1	1	1	1	1	Transmembrane protein 70 homolog, mitochondrial;, KEGG:dme:Dmel_CG7506,
1766	22	5	2	3	6	6	Desmethyl-deoxy-podophyllotoxin synthase {ECO:0000303|PubMed:26359402};,Cytochrome P450 71D11;,Cytochrome P450 71D10;, KEGG:gmx:606548,
1767	5	1	1	1	1	1	None
1768	10	2	2	2	2	2	Cytokinin dehydrogenase 6;, KEGG:ath:AT3G63440,
1769	5	1	1	1	1	1	E3 ubiquitin-protein ligase RMA1H1;, KEGG:cann:107855034,
1770	5	1	1	1	1	1	Transcription factor PHYTOCHROME INTERACTING FACTOR-LIKE 15 {ECO:0000303|PubMed:17485859};,Transcription factor PIF3 {ECO:0000305};, KEGG:ath:AT1G09530,
1771	10	2	2	2	2	2	Lysine-specific demethylase JMJ13 {ECO:0000303|PubMed:30899015};, KEGG:ath:AT5G46910,
1772	5	1	1	1	1	1	Pseudouridylate synthase 1 homolog {ECO:0000305};,tRNA pseudouridine synthase 1;, KEGG:rno:304567,KEGG:yli:YALI0C12749g,
1773	2	2	0	0	0	0	None
1774	10	2	2	2	2	2	Protein HESO1 {ECO:0000303|PubMed:22464194};, KEGG:ath:AT2G39740,
1775	5	1	1	1	1	1	Auxin-responsive protein SAUR36 {ECO:0000305};, KEGG:ath:AT2G45210,
1776	9	2	1	2	2	2	2,6-dihydroxypyridine 3-monooxygenase;,Aurachin C monooxygenase/isomerase {ECO:0000305};, KEGG:ag:CCD27744,KEGG:ag:AAK64255,
1777	2	1	1	0	0	0	None
1778	5	1	1	1	1	1	None
1779	5	1	1	1	1	1	Beta-glucosidase BoGH3B;,
1780	15	3	3	3	3	3	Serine carboxypeptidase-like 45;, KEGG:ath:AT1G28110,
1781	3	1	0	1	1	0	Phosphoglucan, water dikinase, chloroplastic;, KEGG:ath:AT5G26570,
1782	5	1	1	1	1	1	Isochorismate synthase, chloroplastic;, KEGG:ag:CAA06837,
1783	9	2	1	2	2	2	Argininosuccinate synthase, chloroplastic;, KEGG:ath:AT4G24830,
1784	5	1	1	1	1	1	Protein PHOX1 {ECO:0000303|PubMed:20856808};, KEGG:ath:AT2G25290,
1785	5	1	1	1	1	1	Protein SAR DEFICIENT 1 {ECO:0000303|PubMed:20921422};, KEGG:ath:AT1G73805,
1786	10	2	2	2	2	2	None
1787	5	1	1	1	1	1	Endoribonuclease Dicer homolog 2;, KEGG:ath:AT3G03300,
1788	5	1	1	1	1	1	Transcriptional corepressor LEUNIG_HOMOLOG;, KEGG:ath:AT2G32700,
1789	5	1	1	1	1	1	Aspartyl protease family protein 2 {ECO:0000305};,Aspartyl protease family protein At5g10770;, KEGG:ath:AT5G10770,
1790	10	2	2	2	2	2	Probable serine/threonine-protein kinase WNK6;, KEGG:ath:AT3G18750,
1791	5	1	1	1	1	1	Uncharacterized protein At5g01610;, KEGG:ath:AT5G01610,
1792	5	1	1	1	1	1	Inactive protein RESTRICTED TEV MOVEMENT 2;,Protein RESTRICTED TEV MOVEMENT 2;, KEGG:ath:AT5G04890,
1793	5	1	1	1	1	1	Fasciclin-like arabinogalactan protein 1;, KEGG:ath:AT5G55730,
1794	5	1	1	1	1	1	None
1795	5	1	1	1	1	1	PHD finger-containing protein 1 {ECO:0000303|PubMed:33433058};, KEGG:ath:AT1G43770,
1796	16	3	3	3	3	4	RNA exonuclease 4;,Inactive protein kinase SELMODRAFT_444075;, KEGG:fgr:FGSG_04253,KEGG:smo:SELMODRAFT_444075,
1797	5	1	1	1	1	1	Probable protein S-acyltransferase 16;, KEGG:ath:AT3G09320,
1798	14	3	2	3	3	3	Transcription factor MYB17 {ECO:0000305};,Transcription factor LAF1 {ECO:0000303|PubMed:11581165};, KEGG:ath:AT3G61250,KEGG:ath:AT4G25560,
1799	10	2	2	2	2	2	EKC/KEOPS complex subunit TPRKB {ECO:0000305};,EKC/KEOPS complex subunit Tprkb {ECO:0000305};, KEGG:dre:492501,KEGG:mmu:69786,KEGG:hsa:51002,
1800	10	2	2	2	2	2	CDPK-related kinase 1;,CDPK-related kinase 7;, KEGG:ath:AT3G56760,KEGG:ath:AT2G41140,
1801	5	1	1	1	1	1	Hypothetical protein At1g04090;, KEGG:ath:AT1G04090,
1802	7	1	1	1	1	3	None
1803	10	2	2	2	2	2	Glutaredoxin-C9;, KEGG:ath:AT1G28480,
1804	11	2	3	2	2	2	Very-long-chain (3R)-3-hydroxyacyl-CoA dehydratase PASTICCINO 2A {ECO:0000305};, KEGG:osa:4335343,
1805	10	2	2	2	2	2	Small ribosomal subunit protein uS5w {ECO:0000303|PubMed:36423343};, KEGG:ath:AT3G57490,
1806	3	1	1	0	1	0	None
1807	5	1	1	1	1	1	Thioredoxin-like 3-3;, KEGG:osa:4336649,
1808	12	2	2	3	3	2	Protein MOS2;, KEGG:ath:AT1G33520,
1809	12	3	2	2	3	2	Protein FAM135A;,Protein FAM135B;, KEGG:pon:100174474,KEGG:xla:447696,
1810	17	3	3	4	4	3	Beta-1,4-mannosyl-glycoprotein 4-beta-N-acetylglucosaminyltransferase;, KEGG:rno:29582,
1811	4	1	1	0	1	1	GDSL esterase/lipase At1g29670;, KEGG:ath:AT1G29670,
1812	5	1	1	1	1	1	L-type lectin-domain containing receptor kinase IX.1 {ECO:0000303|PubMed:19773388};, KEGG:ath:AT5G10530,
1813	5	1	1	1	1	1	None
1814	5	1	1	1	1	1	Protein transport protein SFT2;, KEGG:sce:YBL102W,
1815	21	4	3	5	5	4	Monothiol glutaredoxin-S11;,Probable receptor-like protein kinase At1g11050;,Glutaredoxin-C11;,Glutaredoxin-C13;, KEGG:ath:AT3G62950,KEGG:ath:AT1G11050,KEGG:ath:AT1G06830,KEGG:ath:AT2G47880,
1816	5	1	1	1	1	1	Zinc finger protein 7 {ECO:0000305};, KEGG:ath:AT1G24625,
1817	12	3	3	1	2	3	Uncharacterized protein At2g23090;, KEGG:ath:AT2G23090,
1818	5	1	1	1	1	1	DNA damage-repair/toleration protein DRT100;, KEGG:ath:AT3G12610,
1819	10	2	2	2	2	2	CBL-interacting serine/threonine-protein kinase 6;, KEGG:ath:AT4G30960,
1820	2	1	0	0	0	1	Probable calcium-binding protein CML16;, KEGG:ath:AT3G25600,
1821	4	1	1	0	1	1	PLASMODESMATA CALLOSE-BINDING PROTEIN 3;, KEGG:ath:AT1G18650,
1822	3	1	0	1	1	0	Probable helicase CHR10 {ECO:0000305};, KEGG:ath:AT2G44980,
1823	5	1	1	1	1	1	Probable WRKY transcription factor 33;, KEGG:ath:AT2G38470,
1824	26	3	3	8	8	4	Asparagine--tRNA ligase, chloroplastic/mitochondrial {ECO:0000305};,MLO-like protein 8;,MLO-like protein 10;,Protein RER1A;,Protein RER1;,Protein RER1B;, KEGG:ath:AT4G39220,KEGG:ath:AT4G17300,KEGG:ath:AT2G21600,KEGG:ath:AT5G65970,
1825	11	2	2	2	3	2	HVA22-like protein c;, KEGG:ath:AT1G69700,
1826	15	4	3	1	4	3	Arginine decarboxylase;, KEGG:bsu:BSU14630,
1827	5	1	1	1	1	1	Partner of Y14 and mago {ECO:0000305};, KEGG:ath:AT1G11400,
1828	10	2	2	2	2	2	Lipoyl synthase 2, mitochondrial;,Lipoyl synthase 1, mitochondrial;,
1829	2	1	1	0	0	0	None
1830	10	2	2	2	2	2	Acyl-CoA hydrolase 2 {ECO:0000303|PubMed:14660652};, KEGG:ath:AT1G01710,
1831	3	1	0	0	1	1	Cysteine-rich receptor-like protein kinase 29;, KEGG:ath:AT4G21410,
1832	5	1	1	1	1	1	Pentatricopeptide repeat-containing protein At4g19890;, KEGG:ath:AT4G19890,
1833	10	2	2	2	2	2	Uncharacterized GPI-anchored protein At4g28100;, KEGG:ath:AT4G28100,
1834	10	2	2	2	2	2	Homeobox-DDT domain protein RLT2 {ECO:0000305};,Homeobox-DDT domain protein RLT1 {ECO:0000305};, KEGG:ath:AT5G44180,KEGG:ath:AT1G28420,
1835	5	1	1	1	1	1	None
1836	2	1	1	0	0	0	None
1837	5	1	1	1	1	1	Receptor-like protein kinase;, KEGG:ini:109187519,
1838	5	1	1	1	1	1	DNA-directed RNA polymerase III subunit 1 {ECO:0000305};, KEGG:ath:AT5G60040,
1839	10	3	1	2	2	2	Protein NRT1/ PTR FAMILY 8.3;, KEGG:ath:AT2G02040,
1840	10	2	2	2	2	2	Beta-1,3-galactosyltransferase 7;, KEGG:ath:AT1G77810,
1841	5	1	1	1	1	1	Protein WVD2-like 7 {ECO:0000305};, KEGG:ath:AT1G70950,
1842	5	1	1	1	1	1	Inactive protein RESTRICTED TEV MOVEMENT 2;,Protein RESTRICTED TEV MOVEMENT 2;, KEGG:ath:AT5G04890,
1843	19	4	4	3	4	4	WAT1-related protein At5g07050;, KEGG:ath:AT5G07050,
1844	5	1	1	1	1	1	Protein EMBRYO DEFECTIVE 514 {ECO:0000303|PubMed:15341625};, KEGG:ath:AT5G62440,
1845	25	5	6	4	5	5	Protein translation factor SUI1 homolog 2;,Protein translation factor SUI1 homolog;,Protein translation factor SUI1 homolog 1;, KEGG:ath:AT4G27130,KEGG:osa:4343445,KEGG:ath:AT1G54290,
1846	10	2	2	2	2	2	DEAD-box ATP-dependent RNA helicase 53, mitochondrial;, KEGG:ath:AT3G22330,
1847	17	4	4	2	3	4	Zinc-finger homeodomain protein 2;,Zinc-finger homeodomain protein 1;,Serine/threonine-protein kinase-like protein At1g28390;, KEGG:ath:AT1G28390,KEGG:osa:4347315,KEGG:ath:AT4G24660,
1848	15	3	3	3	3	3	Calcium-transporting ATPase 8, plasma membrane-type;,Calcium-transporting ATPase 9, plasma membrane-type;,Calcium-transporting ATPase 10, plasma membrane-type;, KEGG:ath:AT4G29900,KEGG:ath:AT5G57110,KEGG:ath:AT3G21180,
1849	5	1	1	1	1	1	Peptidyl-prolyl cis-trans isomerase CYP21-2;,Peptidyl-prolyl cis-trans isomerase CYP20-1;, KEGG:ath:AT3G55920,
1850	10	2	2	2	2	2	Serine/threonine-protein kinase Nek5;,Serine/threonine-protein kinase Nek5 {ECO:0000305};, KEGG:osa:4324792,KEGG:ath:AT3G44200,
1851	10	2	2	2	2	2	Glycerol-3-phosphate acyltransferase 1;, KEGG:ath:AT1G06520,
1852	10	2	2	2	2	2	AT-hook motif nuclear-localized protein 1 {ECO:0000303|PubMed:15604740};,AT-hook motif nuclear-localized protein 3 {ECO:0000312|EMBL:FAA00274.1};, KEGG:ath:AT4G25320,
1853	10	2	2	2	2	2	Trihelix transcription factor ASR3 {ECO:0000303|PubMed:25770109};, KEGG:ath:AT2G33550,
1854	3	1	0	0	1	1	Chaperone protein dnaJ 49;, KEGG:ath:AT5G49060,
1855	15	3	3	3	3	3	Small ribosomal subunit protein eS10z {ECO:0000303|PubMed:36423343};,Small ribosomal subunit protein eS10x {ECO:0000303|PubMed:36423343};,Small ribosomal subunit protein eS10y {ECO:0000305};, KEGG:osa:4329619,KEGG:ath:AT4G25740,KEGG:osa:4335865,
1856	10	2	2	2	2	2	Putative E3 ubiquitin-protein ligase XBAT31;, KEGG:ath:AT2G28840,
1857	19	3	3	2	3	8	Receptor-like protein EIX2 {ECO:0000305};,Receptor-like protein EIX1 {ECO:0000305};,Probable arabinosyltransferase ARAD1;, KEGG:sly:543900,KEGG:sly:101263330,KEGG:ath:AT2G35100,
1858	30	6	6	6	6	6	Expansin-A6;,Expansin-A16;,Expansin-A3;,Expansin-A4;, KEGG:ath:AT2G39700,
1859	10	2	2	2	2	2	Histidine-containing phosphotransfer protein 1;, KEGG:ath:AT3G21510,
1860	4	1	1	0	1	1	Dirigent protein 3;, KEGG:ath:AT5G49040,
1861	15	3	3	3	3	3	Protein NUCLEAR FUSION DEFECTIVE 4 {ECO:0000303|PubMed:16698901};, KEGG:ath:AT1G31470,
1862	10	2	2	2	2	2	Probable inactive patatin-like protein 9;, KEGG:ath:AT3G63200,
1863	27	27	0	0	0	0	None
1864	5	1	1	1	1	1	Putative disease resistance RPP13-like protein 1;, KEGG:ath:AT3G14470,
1865	5	1	1	1	1	1	None
1866	5	1	1	1	1	1	None
1867	4	1	1	0	1	1	Cytochrome b561 and DOMON domain-containing protein At3g25290;, KEGG:ath:AT3G25290,
1868	51	9	9	12	13	8	Signal peptidase complex subunit 1;,Large ribosomal subunit protein uL22 {ECO:0000305};,Protein-L-isoaspartate O-methyltransferase 2;,Large ribosomal subunit protein uL22z {ECO:0000303|PubMed:36423343};,Protein-L-isoaspartate O-methyltransferase 1;,Large ribosomal subunit protein uL22y {ECO:0000303|PubMed:36423343};,Protein-L-isoaspartate O-methyltransferase;, KEGG:ath:AT3G48330,KEGG:ath:AT5G5024…
1869	5	1	1	1	1	1	Transcription factor TFIIIB component B'' {ECO:0000250|UniProtKB:P46678};, KEGG:spo:SPCC1919.14c,
1870	5	1	1	1	1	1	Purine permease 21 {ECO:0000303|PubMed:27701112};,Probable purine permease 10;, KEGG:ath:AT4G18210,KEGG:ath:AT4G18220,
1871	5	1	1	1	1	1	Condensin-2 complex subunit H2;, KEGG:ath:AT3G16730,
1872	3	2	1	0	0	0	None
1873	5	1	1	1	1	1	Protein gamma response 1;, KEGG:ath:AT3G52115,
1874	5	1	1	1	1	1	Light-harvesting complex-like protein 3 isotype 1, chloroplastic {ECO:0000305};, KEGG:ath:AT4G17600,
1875	4	1	1	0	1	1	None
1876	5	1	1	1	1	1	None
1877	5	1	1	1	1	1	Ubiquinol-cytochrome-c reductase complex assembly factor 1;,
1878	10	2	2	2	2	2	26S proteasome regulatory subunit 4 homolog A {ECO:0000305};, KEGG:ath:AT4G29040,
1879	5	1	1	1	1	1	Telomere-associated protein RIF1 {ECO:0000305};, KEGG:mmu:51869,
1880	8	2	2	1	1	2	Cytochrome P450 94A1;, KEGG:ag:AAD10204,
1881	11	2	2	2	2	3	E3 ubiquitin protein ligase RIN2;,Ataxin-10 homolog;,Ataxin-10;, KEGG:bta:767990,KEGG:mmu:54138,KEGG:ath:AT4G25230,
1882	9	2	2	2	2	1	Alpha-glucosidase;,
1883	10	2	2	2	2	2	Transcription factor MYB20 {ECO:0000305};, KEGG:ath:AT1G66230,
1884	10	2	2	2	2	2	Auxin-responsive protein IAA18;,Auxin-responsive protein IAA26;, KEGG:ath:AT3G16500,
1885	10	2	2	2	2	2	Ankyrin repeat-containing protein At2g01680;, KEGG:ath:AT2G01680,
1886	5	1	1	1	1	1	None
1887	5	1	1	1	1	1	None
1888	21	4	5	4	4	4	KH domain-containing protein At2g38610;, KEGG:ath:AT2G38610,
1889	15	3	3	3	3	3	Transmembrane emp24 domain-containing protein p24delta4;,Transmembrane emp24 domain-containing protein p24delta3;,Transmembrane emp24 domain-containing protein p24delta5;, KEGG:ath:AT1G57620,KEGG:ath:AT1G21900,KEGG:ath:AT1G09580,
1890	5	1	1	1	1	1	Putative SWI/SNF-related matrix-associated actin-dependent regulator of chromatin subfamily A member 3-like 1;, KEGG:ath:AT5G05130,
1891	5	1	1	1	1	1	None
1892	5	1	1	1	1	1	Amino acid permease 2;, KEGG:ath:AT5G09220,
1893	15	3	3	3	3	3	Probable protein phosphatase 2C 5;,Probable protein phosphatase 2C 15;, KEGG:ath:AT1G09160,KEGG:ath:AT1G68410,
1894	9	2	2	1	2	2	Ethylene-response factor C3 {ECO:0000305};,Ethylene-responsive transcription factor 15;,Ethylene-responsive transcription factor 1B;, KEGG:ath:AT3G23240,KEGG:sly:101247461,
1895	5	1	1	1	1	1	Oxysterol-binding protein-related protein 1D;, KEGG:ath:AT1G13170,
1896	6	1	1	1	2	1	None
1897	5	1	1	1	1	1	Probable calcium-binding protein CML48;, KEGG:ath:AT2G27480,
1898	2	2	0	0	0	0	None
1899	5	1	1	1	1	1	U-box domain-containing protein 4;, KEGG:ath:AT2G23140,
1900	10	2	2	2	2	2	Phosphatidylinositol 4-phosphate 5-kinase 9;, KEGG:ath:AT3G09920,
1901	9	2	1	2	2	2	Putative calcium-binding protein CML19;,Calcium-binding protein CML38 {ECO:0000303|Ref.5};, KEGG:osa:107277351,
1902	10	2	2	2	2	2	EIN3-binding F-box protein 1;, KEGG:ath:AT2G25490,
1903	13	2	0	2	7	2	UPF0481 protein At3g47200;, KEGG:ath:AT3G47200,
1904	28	7	6	4	7	4	Secologanin synthase 1 {ECO:0000303|PubMed:26285573};,Cytochrome P450 72A68 {ECO:0000303|PubMed:17273868};, KEGG:ag:AAA33106,KEGG:mtr:25486777,
1905	2	1	1	0	0	0	None
1906	10	2	2	2	2	2	None
1907	5	1	1	1	1	1	Probable plastid-lipid-associated protein 12, chloroplastic;, KEGG:ath:AT1G51110,
1908	5	1	1	1	1	1	Uncharacterized lipoprotein syc1174_c;, KEGG:syc:syc1174_c,
1909	7	2	1	1	1	2	NAD(P)H-dependent 6'-deoxychalcone synthase;, KEGG:gmx:547911,
1910	5	1	1	1	1	1	Pentatricopeptide repeat-containing protein At5g57250, mitochondrial;, KEGG:ath:AT5G57250,
1911	2	2	0	0	0	0	None
1912	5	1	1	1	1	1	Cysteine proteinase inhibitor 10;, KEGG:osa:4335551,
1913	18	5	3	3	1	6	Small ribosomal subunit protein uS7cz/uS7cy {ECO:0000255|HAMAP-Rule:MF_00480};,Small ribosomal subunit protein uS7c {ECO:0000305};, KEGG:pvu:PhvuCp74,KEGG:gmx:3989343,KEGG:gmx:3989376,KEGG:pvu:PhvuCp136,
1914	5	1	1	1	1	1	Metal tolerance protein C1;, KEGG:ath:AT2G47830,
1915	7	2	1	1	1	2	None
1916	10	2	2	2	2	2	Probable pectin methyltransferase QUA3 {ECO:0000305};, KEGG:ath:AT4G00740,
1917	2	1	1	0	0	0	None
1918	10	2	2	2	2	2	Receptor-like protein kinase ANXUR1;,Receptor-like protein kinase ANXUR2;, KEGG:ath:AT3G04690,KEGG:ath:AT5G28680,
1919	4	1	1	1	1	0	Probable polyol transporter 3;, KEGG:ath:AT2G18480,
1920	4	1	0	1	1	1	None
1921	10	2	2	2	2	2	Putative MO25-like protein At5g47540;, KEGG:ath:AT5G47540,
1922	4	1	0	1	1	1	None
1923	17	4	4	2	3	4	GTP-binding nuclear protein Ran-3;, KEGG:ath:AT5G55190,
1924	5	1	1	1	1	1	Pathogen-related protein;,
1925	6	1	1	1	1	2	Proteasome subunit beta type-1;,
1926	10	2	2	2	2	2	SPX domain-containing membrane protein At4g11810;,SPX domain-containing membrane protein At4g22990;, KEGG:ath:AT4G11810,KEGG:ath:AT4G22990,
1927	7	1	1	2	2	1	Heptahelical transmembrane protein 4;, KEGG:ath:AT4G37680,
1928	5	1	1	1	1	1	TBC1 domain family member 15;, KEGG:mmu:66687,
1929	5	1	1	1	1	1	Endonuclease V;, KEGG:mmu:338371,
1930	3	1	0	0	1	1	Cytochrome P450 71D10;, KEGG:gmx:606548,
1931	4	1	0	1	1	1	S-adenosylmethionine decarboxylase proenzyme;,
1932	5	1	1	1	1	1	Protein ROLLING AND ERECT LEAF 2 {ECO:0000303|PubMed:27473144};, KEGG:osa:4349394,
1933	5	1	1	1	1	1	Auxin response factor 5;, KEGG:ath:AT1G19850,
1934	9	2	2	1	2	2	None
1935	6	1	1	1	1	2	UDP-glycosyltransferase 87A1;, KEGG:ath:AT2G30150,
1936	5	1	1	0	2	1	DEAD-box ATP-dependent RNA helicase 5;, KEGG:osa:4342981,
1937	5	1	1	1	1	1	Uncharacterized WD repeat-containing protein C3H5.08c;,WD repeat-containing protein 44;, KEGG:bta:286825,KEGG:spo:SPAC3H5.08c,
1938	6	2	1	1	1	1	Chromatin structure-remodeling complex protein SYD;, KEGG:ath:AT2G28290,
1939	5	1	1	1	1	1	Probable aspartic protease At2g35615;, KEGG:ath:AT2G35615,
1940	2	2	0	0	0	0	None
1941	10	2	2	2	2	2	Viral IAP-associated factor homolog;, KEGG:dme:Dmel_CG18593,
1942	10	2	2	2	2	2	Microtubule-destabilizing protein 60 {ECO:0000303|PubMed:29167353, ECO:0000303|PubMed:31638649};, KEGG:ath:AT3G01015,
1943	10	2	2	2	2	2	Prohibitin-2, mitochondrial;,Prohibitin-6, mitochondrial;,Prohibitin-1, mitochondrial;, KEGG:ath:AT2G20530,KEGG:ath:AT1G03860,
1944	4	1	1	0	1	1	Nucleoid-associated protein At2g24020, chloroplastic {ECO:0000305};,Nucleoid-associated protein At4g30620, chloroplastic;, KEGG:ath:AT4G30620,
1945	25	5	5	6	5	4	Mitogen-activated protein kinase 4 {ECO:0000303|PubMed:8282107};,Mitogen-activated protein kinase homolog MMK2;,Mitogen-activated protein kinase homolog NTF6;,Mitogen-activated protein kinase 2;, KEGG:ath:AT4G01370,
1946	4	1	0	1	1	1	Zeaxanthin epoxidase, chloroplastic;, KEGG:osa:4335984,
1947	5	1	1	1	1	1	Leucine-rich repeat receptor-like serine/threonine-protein kinase BAM3 {ECO:0000303|PubMed:16367950};, KEGG:ath:AT4G20270,
1948	5	1	1	1	1	1	Streptococcal surface protein A;,IgA FC receptor;, KEGG:sgo:SGO_0210,
1949	10	2	2	2	2	2	Ethylene-overproduction protein 1;, KEGG:ath:AT3G51770,
1950	5	1	1	1	1	1	GDSL esterase/lipase EXL3;, KEGG:ath:AT1G75900,
1951	10	2	2	2	2	2	Indole-3-acetate O-methyltransferase 1;, KEGG:ath:AT5G55250,
1952	5	1	1	1	1	1	Cyclin-D1-1;, KEGG:ath:AT1G70210,
1953	4	1	0	1	1	1	Presenilin-like protein At2g29900;, KEGG:ath:AT2G29900,
1954	5	1	1	1	1	1	None
1955	5	1	1	1	1	1	Two-component response regulator ORR21 {ECO:0000305};, KEGG:osa:4332111,
1956	5	1	1	1	1	1	None
1957	29	6	6	5	5	7	Small ribosomal subunit protein eS4y {ECO:0000303|PubMed:36423343};,Small ribosomal subunit protein eS4z {ECO:0000303|PubMed:36423343};,LOB domain-containing protein 12;, KEGG:ath:AT2G30130,KEGG:ath:AT5G07090,KEGG:ath:AT2G17360,
1958	5	1	1	1	1	1	None
1959	4	2	2	0	0	0	None
1960	10	2	2	2	2	2	Probable glutathione peroxidase 8;, KEGG:ath:AT1G63460,
1961	5	1	1	1	1	1	Probable pectin methylesterase CGR3 {ECO:0000303|PubMed:25704846};,Probable pectin methylesterase CGR2 {ECO:0000303|PubMed:25704846};, KEGG:ath:AT3G49720,KEGG:ath:AT5G65810,
1962	5	1	1	1	1	1	U3 small nucleolar RNA-associated protein 6 homolog;, KEGG:mmu:216987,
1963	5	1	1	1	1	1	None
1964	10	2	2	2	2	2	GDSL esterase/lipase At1g28610;,GDSL esterase/lipase At1g28570;,GDSL esterase/lipase At1g28590;,GDSL esterase/lipase At1g28580;,GDSL esterase/lipase At5g45910;, KEGG:ath:AT1G28590,KEGG:ath:AT1G28580,KEGG:ath:AT1G28570,KEGG:ath:AT5G45910,
1965	5	1	1	1	1	1	Pentatricopeptide repeat-containing protein At4g38010;, KEGG:ath:AT4G38010,
1966	5	1	1	1	1	1	None
1967	5	1	1	1	1	1	Clathrin light chain 2;, KEGG:ath:AT2G40060,
1968	10	2	2	2	2	2	Lipase lipl-3 {ECO:0000255|PIRNR:PIRNR000862};,Gastric triacylglycerol lipase;, KEGG:cfa:403867,KEGG:cel:CELE_R11G11.14,
1969	18	3	4	3	4	4	Cucumisin {ECO:0000303|PubMed:7806492};,Serine carboxypeptidase-like 45;, KEGG:ath:AT1G28110,KEGG:cmo:103500253,
1970	5	1	1	1	1	1	Probable monogalactosyldiacylglycerol synthase, chloroplastic;, KEGG:gmx:547469,
1971	5	1	1	1	1	1	None
1972	6	2	1	1	1	1	Alpha-N-acetylglucosaminidase {ECO:0000305};, KEGG:ath:AT5G13690,
1973	12	4	2	2	2	2	Zinc finger protein ZAT5;, KEGG:ath:AT2G28200,
1974	10	2	2	2	2	2	Beta-adaptin-like protein C;, KEGG:ath:AT4G23460,
1975	15	3	3	2	4	3	UDP-glycosyltransferase 73C25 {ECO:0000303|PubMed:29603041};,UDP-glycosyltransferase 73C11 {ECO:0000303|PubMed:23027665};,UDP-glycosyltransferase 73C2;,UDP-glycosyltransferase 73C12 {ECO:0000303|PubMed:23027665};, KEGG:ath:AT2G36760,KEGG:ag:AFN26667,
1976	9	1	2	2	2	2	None
1977	5	1	1	1	1	1	None
1978	5	1	1	1	1	1	EPIDERMAL PATTERNING FACTOR-like protein 2 {ECO:0000303|PubMed:19435754};, KEGG:ath:AT4G37810,
1979	5	1	1	1	1	1	Putative branched-chain-amino-acid aminotransferase 7;, KEGG:ath:AT1G50090,
1980	4	1	1	0	1	1	Peroxidase 4 {ECO:0000250|UniProtKB:Q42578};, KEGG:ath:AT5G05340,
1981	9	2	2	1	2	2	DNA-binding protein S1FA2;,DNA-binding protein S1FA;, KEGG:osa:4335761,
1982	10	2	2	2	2	2	Sugar transporter ERD6-like 5;, KEGG:ath:AT1G54730,
1983	5	1	1	1	1	1	Atos homolog protein B;, KEGG:pon:100172463,
1984	5	1	1	1	1	1	None
1985	5	1	1	1	1	1	Squamosa promoter-binding-like protein 6;, KEGG:ath:AT1G69170,
1986	5	1	1	1	1	1	Pentatricopeptide repeat-containing protein At1g02150;, KEGG:ath:AT1G02150,
1987	7	1	1	2	2	1	DNA-directed RNA polymerase II subunit RPB7;, KEGG:gmx:100793057,KEGG:gmx:547985,
1988	5	1	1	1	1	1	None
1989	10	2	2	2	2	2	Phospholipid-transporting ATPase 1 {ECO:0000303|PubMed:11148289};, KEGG:ath:AT5G04930,
1990	5	1	1	1	1	1	Protein WHAT'S THIS FACTOR 1 homolog, chloroplastic {ECO:0000305};, KEGG:ath:AT4G01037,
1991	5	1	1	1	1	1	None
1992	5	1	1	1	1	1	WD repeat-containing protein ATCSA-1 {ECO:0000305};, KEGG:ath:AT1G27840,
1993	5	1	1	1	1	1	None
1994	14	3	2	3	3	3	Beta-amyrin 28-monooxygenase {ECO:0000305};, KEGG:mtr:25502252,KEGG:ag:CBN88269,
1995	5	1	1	1	1	1	Nuclear transcription factor Y subunit B-6 {ECO:0000303|PubMed:11250072};, KEGG:ath:AT5G47670,
1996	8	2	2	1	2	1	Protein disulfide isomerase pTAC5, chloroplastic {ECO:0000303|PubMed:23922206};, KEGG:ath:AT4G13670,
1997	2	2	0	0	0	0	None
1998	5	1	1	1	1	1	None
[truncated: 24,937 more rows]

## Sheet: SupplTable4_genesSVsMesoAndean
Location					Expression transcripts per million (TPM) Garcia et al., 2021
Gene id	Chr	Start	End	Strand	WildT1R1	WildT1R2	WildT1R3	WildT2R1	WildT2R2	WildT2R3	DomT1R1	DomT1R2	DomT1R3	DomT2R1	DomT2R2	DomT2R3	DomT2R4	Flower	Leaf	ResistR1	ResistR2	ResistR3	ResistR4
Pl01G0000043200.v1	Pl01	3662298	3666245	Reverse	0	0	0	0	0	0	0	0	0	0	0	0	0	0	0	0	0	0	0
Pl01G0000062100.v1	Pl01	5721084	5722453	Forward	0.238585	0.503946	0.57958	1.81135	0.833903	1.69741	1.14364	0.591631	0.887445	0.73379	0.800398	1.13162	1.36648	0.387357	0.305625	0.354486	1.05153	1.41885	0.493761
Pl01G0000098900.v1	Pl01	10063832	10066970	Forward	0.073447	0	0	0.027405	0.027979	0	8.96041	8.29766	8.19269	5.77467	5.65391	5.33761	8.31829	5.08316	11.5741	0.137299	0.224009	0.270439	0.206813
Pl01G0000104100.v1	Pl01	10886910	10887309	Forward	0	0	0	0	0	0	0	0	0	0	0	0	0	0	0	1.07516	1.09561	0	3.08142
Pl01G0000106400.v1	Pl01	11196698	11197600	Reverse	0.067698	0	0	0.18753	0	0	0	0	0	0	0	0	0	0.065798	0.064852	0	0	0	0
Pl01G0000108300.v1	Pl01	11426933	11427268	Forward	0	0	0	0	0	0	1.33511	1.31109	1.66436	2.52396	2.56164	2.4624	1.42164	0.489029	3.28986	0	0	0	0
Pl01G0000135600.v1	Pl01	14937691	14939130	Reverse	0	0	0	0	0	0	0	0	0	0	0	0	0	0	0	0	0	0	0
Pl01G0000141400.v1	Pl01	15888418	15890753	Forward	0	0	0	0	0	0	0	0	0	0	0	0	0	0	0	0	0	0	0
Pl01G0000191500.v1	Pl01	22382922	22385555	Forward	0	0	0	0	0	0	0	0	0	0	0	0	0	0	0	0	0	0	0
Pl01G0000205100.v1	Pl01	24451979	24456907	Reverse	0	0	0	0	0	0	0	0	0	0	0	0	0	0	0	0	0	0	0
Pl01G0000206000.v1	Pl01	24590239	24596513	Reverse	0	0	0	0	0	0	0.052621	0.07068	0.084934	0	0.037454	0	0	0	0	0	0	0	0
Pl01G0000209200.v1	Pl01	25091538	25094783	Forward	0	0	0	0	0	0	0	0	0	0	0	0	0	0	0	0	0	0	0
Pl01G0000215800.v1	Pl01	26071431	26073052	Forward	0	0	0	0	0	0	0	0	0	0	0	0	0	0	0	0	0	0	0
Pl01G0000219200.v1	Pl01	26463303	26466381	Forward	0	0	0	0	0	0	0	0	0	0	0	0	0	0	0	0	0	0	0
Pl01G0000222700.v1	Pl01	26988439	26990834	Forward	0.342743	0.188324	0.247153	0.194162	0.207258	0.252703	0.163861	0.230295	0.284256	0.334441	0.346565	0.033599	0.252399	0.24694	0.273301	0.61787	0.57732	1.07466	0.1448
Pl01G0000233300.v1	Pl01	28798185	28802727	Forward	15.448	19.9888	16.8205	10.788	11.9762	12.4767	12.5314	14.974	13.7597	13.2803	13.6107	14.4465	13.2967	15.3456	10.4022	8.03329	6.11602	6.46713	6.25025
Pl01G0000234000.v1	Pl01	28892635	28893170	Reverse	7.85666	5.8404	6.17581	4.55256	6.3483	5.63939	6.66434	4.1813	3.99204	3.97021	2.69041	3.39156	4.96692	2.75549	9.6658	1.86197	0.981306	0.750021	4.59324
Pl01G0000235600.v1	Pl01	29201177	29202188	Reverse	0.778145	0.969583	1.23729	0.742278	0.701055	0.505925	0.439046	0.202705	0.660345	0.949257	0.53206	0.514449	0.753554	0.414693	0.247689	0	0	0	0.228702
Pl01G0000259900.v1	Pl01	32428974	32430551	Reverse	0	0	0	0	0	0	0	0	0	0	0.197741	0	0	0	0	0	0	0	0
Pl01G0000260000.v1	Pl01	32434528	32435951	Forward	0	0	0	0	0.109389	0.26465	0	0	0.096539	0	0	0	0	0	0	0	0	0	0
Pl01G0000266200.v1	Pl01	33145337	33147431	Forward	0.056337	0.046695	0.069641	0.032727	0.060575	0.217285	0.098947	0	0	0.100361	0.109466	0.171694	0	0	0.012901	0	0	0	0
Pl01G0000332500.v1	Pl01	40232280	40234649	Forward	0	0	0	0	0	0	0	0	0	0.119792	0.200033	0.120143	0.043656	0.167609	0.087771	1.01885	1.3081	1.21774	0.340344
Pl01G0000348000.v1	Pl01	41682703	41683415	Forward	0	0	0	0	0	0	0.3854	0	0.048856	0.090722	0.62406	0	0	0.078639	0	0.123687	0.179746	0	0.148726
Pl01G0000368200.v1	Pl01	43301520	43302848	Forward	17.5879	15.937	15.5276	5.44169	5.20585	4.61166	5.08302	6.20249	5.67742	1.98444	2.28603	2.71885	0.387316	4.56249	0.102558	4.31398	155.806	13.7362	3.09226
Pl01G0000368300.v1	Pl01	43302914	43305195	Reverse	0	0	0	0	0	0	0.180976	0.028567	0.053068	0	0.081442	0	0	0	0	0	1.38046	0	0.056169
Pl01G0000374100.v1	Pl01	43806736	43807866	Reverse	0	0	0	0	0	0	0	0.089195	0	0	0	0	0	0	0	0	0	0	0
Pl01G0000394400.v1	Pl01	45504429	45505233	Reverse	0	0	0	0	0	0	0	0	0	0.113757	0	0	0	0	0	0	0	0	0
Pl02G0000021500.v1	Pl02	1356987	1357522	Reverse	1.40026	1.29312	1.37182	3.93875	2.62124	3.45073	0	0	0	0.049224	0.089224	0.152219	0.076709	0.124364	0	0.299224	0.309992	0.477283	0.183133
Pl02G0000052800.v1	Pl02	4091674	4092166	Reverse	0	0	0	0	0	0	0.139443	0	0	0	0	0	0	0	0	0	0	0	0
Pl02G0000088600.v1	Pl02	7240985	7243071	Forward	0	0	0.03108	0.034059	0.088409	0	0	0.063689	0	0	0	0.115414	0.029281	0	0.013513	0.052414	0	0	0
Pl02G0000101400.v1	Pl02	8226331	8227704	Forward	0.031373	0.099395	0.170228	0.214059	0.164321	0.2307	1.33025	1.253	0.940215	0.37504	0.598372	0.268798	1.33625	0.17675	2.15687	0.401441	0.069391	0.196802	0.332082
Pl02G0000101500.v1	Pl02	8228297	8228623	Forward	0.164872	0.123154	0.097804	0.037201	0.210462	0.425484	9.51188	4.9375	6.39224	0.996787	1.3536	0.784079	1.40308	0.610121	2.04168	0.326873	0.165347	0	0
Pl02G0000109200.v1	Pl02	9012546	9012734	Reverse	0	0	0	0	0	0	2.52085	0.117648	1.40896	0.975067	1.74734	0.911138	2.49498	1.92494	2.83719	7.32078	4.89648	13.5858	9.94509
Pl02G0000109300.v1	Pl02	9012861	9013088	Reverse	0.060374	0.087778	0.217954	0.069317	0.076164	0.073562	1.99436	0.663819	1.46654	0.997005	0.922643	0.596539	1.9986	1.01113	3.06769	1.59276	0.592274	4.66625	6.20285
Pl02G0000109400.v1	Pl02	9013132	9013305	Reverse	0.16499	0.139128	0.413941	0.114265	0.15984	0.159418	1.92625	2.37993	1.59101	1.63932	3.38645	2.86131	3.09258	2.41456	5.73829	3.67676	1.81611	8.35478	11.9434
Pl02G0000118300.v1	Pl02	9989953	9991126	Forward	0	0	0	0	0	0	0	0.020198	0	0	0	0	0	0	0	0	0	0	0
Pl02G0000118400.v1	Pl02	9991439	9992542	Forward	0.055564	0	0	0.11082	0.007431	0	0	0	0.004286	0	0.011122	0.017087	0	0	0.052048	0	0	0	0.038192
Pl02G0000139600.v1	Pl02	12199189	12201019	Forward	0.03467	0.032627	0	0	0	0	0	0	0	0	0	0	0	0	0	0	0	0	0
Pl02G0000148100.v1	Pl02	13067767	13068627	Forward	0	0	0	0	0.150864	0.452395	0	0	0	0	0	0	0	0	0	0	0	0	0
Pl02G0000153900.v1	Pl02	13894370	13895422	Reverse	0	0	0	0	0	0	0	0	0	0	0	0.377299	0	0	0	0	0	0	0
Pl02G0000157000.v1	Pl02	14265299	14266537	Forward	0	0	0	0	0	0	0	0	0	0	0	0	0	0	0	0	0	0	0
Pl02G0000163200.v1	Pl02	14926797	14928455	Reverse	0.08676	0.011449	0.013084	0	0.050469	0.015651	0.016305	0	0	0	0	0.126193	0	0	0.019207	0.066597	0.063763	0	0.019723
Pl02G0000164000.v1	Pl02	15057677	15060727	Forward	19.2812	16.7378	20.5697	14.5465	13.3978	18.1194	0	0.175793	0.106467	0	0	0	0.048951	0	0	0	0	0	0
Pl02G0000164100.v1	Pl02	15059974	15060719	Forward	49.7693	43.2757	27.5836	25.6818	31.1311	22.2746	0.09077	0.482433	0.001741	0	0	0	0	0	0	0	0	0	0
Pl02G0000174600.v1	Pl02	16400070	16400930	Forward	0	0	0	0	0.081115	0	0	0	0.028571	0	0	0	0	0.056931	0	0	0	0	0
Pl02G0000174700.v1	Pl02	16404130	16407913	Forward	0.099203	0	0	0	0	0	0	0	0	0	0	0.010038	0	0.083986	0	0	0	0	0
Pl02G0000174800.v1	Pl02	16423567	16424430	Forward	0	0	0.166293	0	0.06896	0.324172	0	0	0.028571	0	0	0	0	0.056931	0	0	0	0	0
Pl02G0000174900.v1	Pl02	16427633	16431415	Forward	0	0	0	0	0	0	0	0	0	0	0	0.008669	0	0.062849	0	0	0	0	0
Pl02G0000177400.v1	Pl02	16975057	16976056	Forward	0	0	0	0	0	0	0	0	0	0	0	0	0	0	0	0	0	0	0
Pl02G0000177500.v1	Pl02	16984620	16990159	Reverse	0.598419	1.09447	1.18178	0.705158	0.959731	0.861392	1.19887	0.809015	1.0658	1.67049	1.61238	1.4898	2.16577	0.82952	1.26086	1.15773	0.742852	0	0.594204
Pl02G0000177700.v1	Pl02	17004391	17006357	Reverse	0.175645	0.358393	0.526875	0.595496	0.647586	0.341097	0.112771	0.352248	0.220463	0.276295	0.273738	0.378103	0.379693	0.340804	0.367526	0.83754	0.966101	0	0.495314
Pl02G0000177800.v1	Pl02	17006519	17007013	Forward	1.34016	1.1589	1.55046	1.03726	1.68725	1.29864	1.57668	2.1182	1.31697	0.997179	0.477852	1.36771	1.16742	3.03401	1.66692	1.47418	1.38156	0	0.947565
Pl02G0000177900.v1	Pl02	17009050	17010970	Forward	0	0	0	0	0	0	0	0.049787	0.136782	0.152252	0.118596	0.287105	0.168258	0	0.063704	0	0	0	0
Pl02G0000179700.v1	Pl02	17312666	17313907	Reverse	0	0.095099	0.067846	0.102725	0	0	0	0.090076	0	0	0	0.113397	0	0	0	0	0	0	0
Pl02G0000182300.v1	Pl02	17584592	17586038	Forward	0	0	0	0	0	0	0.706716	1.15347	0.591246	0.543977	0.896233	0.737979	0.062369	0.486438	0	0.049714	0	0	0
Pl02G0000182400.v1	Pl02	17592041	17592337	Forward	0	0	0	0	0	0	0.227993	0.298514	0.113037	0.108681	0.204763	0.080659	0	0.113216	0	0.057849	0.066165	0	0
Pl02G0000182500.v1	Pl02	17599518	17600965	Forward	0	0	0	0	0	0	0.36283	0.532708	0.369713	0.266949	0.283151	0.328072	0.101284	0.233897	0	0.067169	0.03633	0	0
Pl02G0000183100.v1	Pl02	17725353	17726067	Reverse	0	0	0	0	0	0	0	0	0	0	0	0	0	0	0	0	0	0	0
Pl02G0000183700.v1	Pl02	17783121	17783620	Reverse	0	0	0	0	0	0	0	0	0	0	0	0	0	0	0	0	0	0	0
Pl02G0000189600.v1	Pl02	18721459	18726641	Forward	0	0	0	0.005295	0	0	0.052364	0.020044	0.040699	0	0	0.011904	0.048618	0	0	0	0.014428	0	0.034632
Pl02G0000195600.v1	Pl02	19529038	19529334	Reverse	0.101072	0	0	0.016203	0	0.040345	0.637363	1.18975	1.17344	1.46107	0.972968	1.9222	2.17716	1.69908	1.7263	0.038968	0.060075	1.16899	1.26157
Pl02G0000206000.v1	Pl02	21066029	21066792	Forward	0	0	0	0	0	0	0	0	0	0	0	0	0	0	0	0	0	0	0
Pl02G0000208900.v1	Pl02	21608036	21609076	Forward	0	0	0	0	0	0	0	0	0	0	0	0	0	0	0	0	0	0	0
Pl02G0000211500.v1	Pl02	21988530	21992180	Forward	0	0	0	0	0	0	0	0	0	0	0	0	0	0	0	0	0	0	0
Pl02G0000229700.v1	Pl02	25015716	25020239	Forward	0.668891	0.565454	0.531659	0.222301	0.309385	0.273705	0	0	0	0	0	0.05648	0	0	0	0	0	0	0.022016
Pl02G0000233000.v1	Pl02	25496419	25499114	Reverse	0	0	0	0	0	0	0	0	0	0	0	0	0	0	0	0	0	0	0
Pl02G0000270600.v1	Pl02	31822766	31823275	Forward	0	0	0	0	0	0	0	0	0	0	0	0	0	0	0	0	0	0	0
Pl02G0000280800.v1	Pl02	33236185	33236942	Reverse	0	0	0	0	0	0	8.36375	8.33016	8.23799	3.87261	6.07184	3.61157	7.41041	2.83799	7.07724	1.90185	0.653277	1.59107	1.47781
Pl02G0000307500.v1	Pl02	36961246	36962476	Reverse	0	0	0	0	0	0	0	0	0	0	0	0	0	0	0	0	0	0	0
Pl02G0000320500.v1	Pl02	38462315	38464553	Reverse	0	0	0	0	0	0	0	0.063477	0	0	0	0	0	0	0	0	0	0	0
Pl02G0000331200.v1	Pl02	39582350	39583738	Reverse	0	0	0	0.081782	0	0	5.8662	7.42615	7.66209	20.542	18.1386	14.1022	28.9804	4.74005	1.52182	14.7575	11.3758	24.7045	10.2107
Pl02G0000421800.v1	Pl02	47821512	47821973	Forward	0	0	0	0	0	0	0.926999	0.337398	0	0.601009	1.31283	2.15978	0.281589	14.962	0.024334	0	0	0	0
Pl03G0000016100.v1	Pl03	1352990	1353199	Reverse	0	0.124849	0	0.498119	0.272171	0.013823	0.124658	0.158279	0.071019	0.336701	0.115406	0	0	0.75436	0	0.222717	0.985417	8.11174	0.087642
Pl03G0000016200.v1	Pl03	1353384	1353593	Forward	0	0.154813	0	0	0.056648	0	0.028256	0.078048	0.248812	0.441453	0.513943	0.466223	0.209558	0.831804	0.026768	0.147721	0.590857	1.98201	0.523196
Pl03G0000023600.v1	Pl03	2043870	2044199	Reverse	0.089744	0.076905	0.044293	0.164109	0.120339	0.201735	0.750382	1.60317	1.42373	2.38411	1.80893	1.33457	0.550496	0.525805	0.989884	0.196037	0.128075	0.187048	0.117744
Pl03G0000023700.v1	Pl03	2044792	2046165	Reverse	0.219943	0.074192	0.026479	0.24902	0.205713	0.249614	0.415442	0.371572	0.369386	0.742697	0.86415	0.739122	0.347606	0.124602	0.208498	0.442165	0.267685	0	0.103017
Pl03G0000062300.v1	Pl03	6993641	6995046	Forward	0.18851	0.775368	0.395391	28.8861	29.569	33.0159	30.7003	35.2945	30.571	43.408	40.7165	48.0734	36.0529	58.9442	1.78918	39.9089	5.24578	28.2649	4.53314
Pl03G0000062400.v1	Pl03	6995854	6999610	Reverse	14.2968	15.1214	10.9862	15.8234	14.7634	15.1217	16.2286	13.216	16.4476	15.9103	13.8623	13.9277	11.9267	10.5544	6.12999	8.33448	4.57308	2.79473	4.81066
Pl03G0000062500.v1	Pl03	7001803	7002366	Reverse	0.644225	0.451228	1.42365	2.02679	1.66751	2.39219	0.081691	0.352384	0.177626	0.354213	0.087087	0.216685	0.031894	0.424344	0.504979	1.23205	0.33542	2.21755	0.681332
Pl03G0000080000.v1	Pl03	9287911	9290155	Forward	0.11926	0.14574	0.099668	0	0	0	0.405917	0.124923	0.1521	0	0	0.31097	0.108767	0	4.38238	12.6851	3.42552	13.3127	43.2737
Pl03G0000081100.v1	Pl03	9422963	9424513	Reverse	0	0	0	0	0	0	0	0	0	0	0	0	0	0	0	0	0	0	0
Pl03G0000092200.v1	Pl03	11239859	11240071	Reverse	35.8903	28.8541	33.1042	14.5895	16.7435	20.492	10.7515	8.24591	6.54533	5.40408	4.28271	3.55664	1.57971	3.01359	10.9001	6.43057	1.58123	3.2886	5.73172
Pl03G0000096000.v1	Pl03	11774984	11776974	Forward	0	0	0	0	0	0	0	0	0	0	0	0	0	0	0	0	0	0	0
Pl03G0000105000.v1	Pl03	13107111	13109446	Forward	0	0	0	0	0	0	0	0	0	0	0	0	0	0	0	2.99951	1.64378	0	2.46785
Pl03G0000108100.v1	Pl03	13464949	13471778	Forward	0	0	0	0	0	0	0	0	0	0	0	0	0	0	0	0	0	0	0
Pl03G0000122300.v1	Pl03	15866844	15870697	Reverse	0	0	0	0	0	0	0	0	0	0.033936	0	0	0	0	0	0	0	0	0
Pl03G0000126500.v1	Pl03	16450655	16451155	Reverse	0	0	0	0	0	0	0	0	0	0	0	0	0	0	0	0	0	0	0
Pl03G0000135100.v1	Pl03	17537961	17538462	Reverse	0	0	0	0	0	0	0	0	0	0	0	0	0.059566	0	0	0	0	0	0
Pl03G0000135200.v1	Pl03	17538676	17539779	Reverse	0.010802	0	0.009265	0	0	0	0	0.02201	0.013155	0.007198	0	0	0	0	0	0	0.1449	0	0
Pl03G0000135300.v1	Pl03	17540031	17541200	Reverse	0.008469	0.020165	0	0	0	0	0	0	0.005909	0	0	0	0	0	0	0	0	0	0
Pl03G0000135600.v1	Pl03	17549508	17550677	Forward	0	0	0	0	0	0	0	0	0	0	0	0	0	0	0	0	0	0	0
Pl03G0000135700.v1	Pl03	17550929	17552032	Forward	0	0	0.011983	0	0	0	0.01897	0.009136	0	0.007198	0	0	0	0	0	0	0.165003	0	0.019399
Pl03G0000164100.v1	Pl03	20740317	20741420	Reverse	0	0	0	0.011082	0	0	0	0	0.020497	0	0	0	0	0	0	0	0	0	0.024148
Pl03G0000164200.v1	Pl03	20741792	20742967	Reverse	0	0	0	0	0	0	0	0.018456	0	0	0	0.110183	0	0	0	0	0	0	0
Pl03G0000169300.v1	Pl03	21253067	21253791	Reverse	0	0	0	0	0	0	1.91505	0.916418	1.38476	1.16693	1.92873	1.00979	1.5595	0	1.50568	0	0	0	0
Pl03G0000176400.v1	Pl03	22047302	22047746	Forward	0	0	0	1.49974	0.277338	0	5.14441	6.25362	6.02793	0	0.028345	0	0	0	0.537914	4.26445	1155.24	0	0
Pl03G0000190100.v1	Pl03	23595117	23595512	Reverse	3.86643	3.32275	3.80857	4.41287	3.95431	6.3103	4.88305	7.30447	5.80765	6.48394	5.55826	6.13651	4.34621	4.18428	2.44068	0.516443	0.837859	0.666528	0.728138
Pl03G0000190200.v1	Pl03	23599874	23601053	Forward	1.85225	1.41016	1.41304	1.26527	1.74258	2.62094	0.156181	0.401157	0.241013	0.323653	0.309213	0.305368	0.311964	0.259994	0.256375	0.156354	0.105319	0	0.239632
Pl03G0000243600.v1	Pl03	29539588	29540762	Forward	0	0	0	0	0	0	0	0	0	0	0	0	0	0	0	0	0	0	0
Pl03G0000243800.v1	Pl03	29542294	29542795	Forward	0	0	0	0	0	0	0	0	0	0	0	0	0	0	0	0	0	0	0
Pl03G0000283100.v1	Pl03	33452595	33452927	Reverse	0.859456	0.157467	0.176107	0.296371	0.207774	0.045524	0.376609	0.466725	0.220278	0	0.031639	0.22833	0.152411	1.23965	0.169828	0.278097	0.055782	1.74378	0.241177
Pl03G0000325000.v1	Pl03	38519552	38520274	Forward	0	0	0	0	0	0	0	0	0	0	0	0	0	0	0.07239	0	0	0	0
Pl03G0000329500.v1	Pl03	38949204	38949455	Reverse	0	0	0	0	0	0	0	0	0	0	0	0	0	0	0	0	0	0	0
Pl03G0000367700.v1	Pl03	42752013	42753033	Forward	0	0	0	0	0	0	0	0	0	0	0.066501	0	0	0	0	0	0	0	0
Pl03G0000387500.v1	Pl03	44723346	44724574	Reverse	0	0	0	0	0	0	0	0	0.144583	0	0	0	0.111391	0	0	1.15347	0.784492	0	1.10345
Pl04G0000065300.v1	Pl04	6591510	6594181	Forward	0.03813	0	0	0.047023	0	0	0	0.009083	0	0	0	0	0	0	0.030116	0	0	0	0.015551
Pl04G0000067700.v1	Pl04	6850769	6852614	Reverse	0	0	0	0	0	0	0	0	0.031231	0	0	0	0	0	0	0.013525	0.009235	0	0
Pl04G0000096800.v1	Pl04	10841762	10843235	Reverse	1.76233	4.42177	2.12217	3.77455	3.67832	3.37128	0	0	0	0	0	0	0	0	0	0	0	0	0
Pl04G0000118400.v1	Pl04	14200559	14202259	Forward	0	0	0	0	0	0	0	0	0	0	0.089456	0	0	0	0	0	0	0	0
Pl04G0000128300.v1	Pl04	15549873	15550414	Forward	1.21474	1.18455	1.72013	0.949365	0.232137	1.07828	0	0	0	0	0	0	0	0	0	0	0	0	0.239024
Pl04G0000129600.v1	Pl04	15737607	15738823	Forward	0	0	0	0	0	0	0	0	0	0	0	0	0	0	0	0.305574	0.238906	0	1.12345
Pl04G0000130800.v1	Pl04	15869363	15870805	Forward	0	0	0	0	0	0	0	0	0	0	0	0	0	0	0	0	0	0	0
Pl04G0000132700.v1	Pl04	16189440	16190913	Forward	0	0	0	0	0	0	0	0	0	0	0	0	0	0	0	0	0	0	0
Pl04G0000158100.v1	Pl04	20687045	20688737	Forward	0	0	0	0	0	0	0	0	0	0	0	0	0	0	0	0	0	0	0
Pl04G0000164200.v1	Pl04	21348595	21353063	Reverse	0	0	0	0	0	0	0	0	0	0	0	0	0	0	0.024128	0	0	0	0
Pl04G0000187800.v1	Pl04	25209668	25211609	Forward	0	0	0	0	0	0	0	0	0	0	0	0	0	0	0	0	0	0	0
Pl04G0000196800.v1	Pl04	26779879	26783806	Reverse	0	0	0	0	0	0	0	0	0	0	0	0	0	0	0	0	0.0339	0	0
Pl04G0000214400.v1	Pl04	29489445	29494685	Forward	0	0	0	0	0	0	0	0	0	0	0	0	0	0	0	0	0	0	0
Pl04G0000214900.v1	Pl04	29575157	29576365	Forward	0	0	0	0	0	0	0	0	0	0	0	0.18666	0	0	0.038041	0	0	0	0
Pl04G0000229100.v1	Pl04	31885677	31887083	Reverse	0	0	0	0	0	0	0	0	0	0	0	0	0	0	0	0	0	0	0
Pl04G0000249500.v1	Pl04	35083977	35085650	Reverse	0	0	0	0	0	0	0	0	0	0	0	0	0	0	0	0	0	0	0
Pl04G0000267300.v1	Pl04	37417747	37420051	Forward	0	0.02309	0	0	0	0	0	0	0	0	0	0	0	0	0	0	0	0	0
Pl04G0000276400.v1	Pl04	38743053	38743342	Forward	7.30452	6.64473	5.76391	0.386353	0.955717	0.218989	1.00487	0.410808	0.592772	0.577708	1.33677	1.33028	0.512262	0	7.86162	0	0	0	0.243637
Pl04G0000276500.v1	Pl04	38744021	38744255	Reverse	5.54927	2.8106	4.65057	0	0	0	0	0	0	0	0	0	0	0	0	0	0	0	0
Pl04G0000277900.v1	Pl04	38931008	38932440	Reverse	0	0	0.10012	0	0.247428	0	0	0	0	0	0.111816	0	0	0	0	0	0	0	0
Pl04G0000278100.v1	Pl04	38975957	38978180	Reverse	0	0	0	0	0	0	0	0	0	0	0	0	0	0	0	0	0	0	0
Pl04G0000293900.v1	Pl04	41137628	41137968	Forward	0	0	0	0	0	0	0.736979	0.160664	0.381561	3.50525	3.99137	3.69689	0	0.317951	0.210801	2.21551	0.752595	0	0
Pl04G0000305700.v1	Pl04	42878229	42879447	Reverse	0.020003	0	0	0.129659	0.091653	0	0.152073	0	0.02441	0	0.132006	0.017087	0.086415	0.072383	0	0	0	0	0
Pl04G0000305900.v1	Pl04	42880273	42880935	Reverse	0	0	0	0	0	0	0	0	0	0	0	0	0	0	0	0	0	0	0
Pl04G0000313900.v1	Pl04	43784998	43786173	Forward	0	0	0	0	0	0	0.024162	0	0	0	0	0	0	0	0	0	0	0	0
Pl04G0000314000.v1	Pl04	43786566	43787669	Forward	0	0	0	0	0	0	0	0	0	0	0	0	0	0	0	0	0	0	0
Pl04G0000319700.v1	Pl04	44372086	44374008	Reverse	0	0	0	0	0	0	0	0	0	0	0	0	0	0	0	0	0	0	0
Pl04G0000324000.v1	Pl04	44777723	44780343	Reverse	0	0	0	0	0	0.021159	0	0	0	0	0.072383	0	0	0	0	0	0	0	0
Pl05G0000037600.v1	Pl05	3010377	3013288	Reverse	0	0.098736	0	0	0	0	0	0	0.087278	0	0	0	0	0	0	0	0	0	0
Pl05G0000046300.v1	Pl05	3794540	3795900	Reverse	0.036622	0	0	0.046463	0	0	0	0.114616	0	0	0	0	0	0	0	0	0	0	0
Pl05G0000058100.v1	Pl05	5216748	5217134	Reverse	0	0	0	0	0.018232	0.150687	0	0	0	0	0.061788	0	0	0	0	0.072759	0	0	0
Pl05G0000071400.v1	Pl05	6737347	6738436	Reverse	0	0	0	0	0	0	0	0	0	0	0	0	0	0	0	0	0.097568	0	0
Pl05G0000071600.v1	Pl05	6739064	6739838	Reverse	0	0	0	0	0	0	0.104267	0	0	0.057248	0	0	0	0	0	0	0	0	0
Pl05G0000097400.v1	Pl05	10350769	10352820	Reverse	0	0	0	0	0	0	0	0	0	0	0	0	0	0	0	0	0	0	0
Pl05G0000122800.v1	Pl05	15784798	15786039	Reverse	0	0	0	0	0	0	0	0	0	0	0	0	0	0	0	0	0	0	0
Pl05G0000132200.v1	Pl05	17625177	17626787	Forward	0	0	0	0	0	0	0	0	0	0	0	0	0	0	0	0	0	0	0
Pl05G0000141600.v1	Pl05	19706095	19706262	Forward	0.222585	0	0	0	0.631593	0.322542	0	0	0	0	0	0	0	0	0	0	0	0	0
Pl05G0000164100.v1	Pl05	24245424	24246878	Reverse	0	0	0	0	0	0	0	0	0	0	0	0	0	0	0	0	0	0	0
Pl05G0000165100.v1	Pl05	24334268	24334733	Forward	3.19605	4.04239	2.85424	1.42153	1.37163	3.55802	0	0	0	0	0	0	0	0	0	0	0	0	0
Pl05G0000167000.v1	Pl05	24522933	24523457	Reverse	0	0	0	0	0	0	0.139397	0	0.2345	0.518816	0.172747	0.17141	0.40001	0	0.468166	0	0	0	0
Pl05G0000168300.v1	Pl05	24775224	24776084	Forward	0	0	0	0	0	0	0	0	0	0	0	0	0	0	0	0	0	0	0
Pl05G0000168400.v1	Pl05	24779203	24783071	Forward	0.095605	0	0	0	0	0	0	0	0	0	0	0.005756	0	0	0	0	0	0	0
Pl05G0000170600.v1	Pl05	25075386	25077531	Forward	0	0	0	0	0	0	0	0	0	0	0	0	0	0	0	0	0	0	0
Pl05G0000186600.v1	Pl05	27528440	27530128	Reverse	0	0	0	0	0	0	0	0	0	0	0	0	0	0	0	0	0	0	0
Pl05G0000189900.v1	Pl05	27877124	27879234	Forward	0.570633	0.713727	1.18765	1.0562	0.953262	0.700235	3.02114	2.87873	2.68902	3.40513	4.03508	2.53525	1.46812	1.40165	0.955757	0.957203	0.213803	0	0.158405
Pl05G0000190000.v1	Pl05	27879437	27880056	Forward	1.98037	2.55305	2.32891	3.1369	2.79825	3.32037	4.10236	3.78455	3.51666	5.90168	2.67527	4.05034	1.43616	1.12372	1.29733	1.11461	0.178974	1.29026	1.16312
Pl05G0000191300.v1	Pl05	28017695	28018636	Forward	0	0	0	0	0	0	0	0	0	0	0	0	0	0	0	0	0	0	0
Pl05G0000191600.v1	Pl05	28069389	28072452	Reverse	0	0	0	0	0	0	0	0	0	0	0.009631	0	0	0	0.017324	0	0	0	0
Pl05G0000194200.v1	Pl05	28329549	28329769	Forward	14.5017	13.7427	15.0929	18.6516	16.5544	20.9331	0.236906	0	0	0	0	0	0	0	0	0	0	0	0
Pl05G0000204500.v1	Pl05	29345288	29345759	Forward	0	0	0	0	0	0	0	0	0	0	0	0	0	0	0	0	0	0	0
Pl05G0000236700.v1	Pl05	32797473	32799156	Forward	0	0	0	0	0	0	0	0	0	0	0	0	0	0	0	0	0	0	0
Pl05G0000237700.v1	Pl05	32878794	32882869	Forward	1.32485	0.926753	0.849716	0.898547	0.950627	1.00751	0.221197	0.317818	0.386385	0.390085	0.188968	0.414382	0.393412	0.106386	0.421809	1.16965	0.53752	5.49972	2.35813
Pl05G0000237800.v1	Pl05	32888203	32888328	Forward	0	0	0	0	0	0	0	0.223775	0	0	0	0	0.950913	0.015935	0.743546	0.401497	0.128027	0	0
Pl05G0000257000.v1	Pl05	34894354	34894494	Reverse	2.60189	2.63674	2.40116	0.831542	0.784887	0.438444	3.50975	3.94634	5.31515	2.38543	1.34089	1.67386	0.536977	3.60143	2.97983	6.2855	2.89669	8.7814	20.1736
Pl05G0000263200.v1	Pl05	35373878	35374282	Forward	0	0	0	0	0	0	0	0	0	0	0	0	0	0	0	0	0	0	0
Pl05G0000263300.v1	Pl05	35375202	35376836	Reverse	0	0	0	0	0	0	0	0	0	0	0	0	0	0	0	0	0	0	0
Pl06G0000007700.v1	Pl06	1026431	1028235	Reverse	1.89808	1.93834	1.76304	0.201922	0.353866	0.298992	0.534608	0.556343	0.667514	0	0	0.057975	0.330841	0.083796	7.43218	1.34266	0.085661	0	2.55566
Pl06G0000018700.v1	Pl06	2408923	2412379	Reverse	0	0.028297	0	0	0	0	9.28914	14.0225	13.6059	7.66925	7.64103	6.37799	24.9475	9.16419	15.5707	1.21949	1.09175	0.46541	0.125314
Pl06G0000023200.v1	Pl06	3077370	3078438	Reverse	0	0	0	0	0	0	5.40535	4.17248	4.25963	4.86742	5.67772	7.84168	7.79116	3.60617	5.36804	1.88608	1.22591	3.08136	2.22324
Pl06G0000023500.v1	Pl06	3131383	3131571	Forward	3.03406	3.34891	3.66246	1.37827	1.96306	1.8479	6.41323	4.14529	3.83673	1.78275	2.27655	4.08428	0.403757	1.46681	7.02118	18.5523	6.79664	0	7.56219
Pl06G0000024600.v1	Pl06	3325410	3326770	Forward	0	0	0	0	0	0	0	0	0	0	0	0	0	0	0	0	0	0	0
Pl06G0000042900.v1	Pl06	5685248	5685529	Reverse	0.340385	0.530564	0.448556	2.21262	1.07401	0.544433	0.383698	0.124371	0.308566	3.26831	3.73289	5.21766	0.894176	5.88528	5.13677	0	0	8.539	1.45265
Pl06G0000044300.v1	Pl06	5941767	5949761	Reverse	0	0	0	0	0	0	0	0	0	0	0	0	0	0	0	0	0	0	0
Pl06G0000061100.v1	Pl06	8460401	8460547	Forward	0	0	0	0	0	0	0	0.010604	0	0	0	0	0	0	0	0	0	0	0
Pl06G0000072100.v1	Pl06	10699019	10700991	Reverse	0	0	0	0	0	0	0	0	0	0	0	0	0	0	0	0	0	0	0
Pl06G0000080700.v1	Pl06	12017252	12017769	Forward	0	0	0	0	0	0	0	0	0	0	0	0	0	0	0	0	0	0	0
Pl06G0000083100.v1	Pl06	12312323	12314232	Forward	0	0	0	0	0	0	0	0	0	0	0	0	0	0	0	0	0	0	0
Pl06G0000099700.v1	Pl06	14593273	14593987	Forward	0	0	0	0	0	0	0	0	0	0	0	0	0	0	0	0	0	0	0
Pl06G0000102100.v1	Pl06	14893290	14895621	Forward	0.075576	0	0.059276	0.149058	0.110391	0.076386	0	0	0	0	0	0	0	0	0	0	0	0	0
Pl06G0000103800.v1	Pl06	15073449	15073586	Forward	0	0	0	0	0	0	0	0	0	0	0	0.161015	0	0	0	0	0	0	0
Pl06G0000103900.v1	Pl06	15075455	15076036	Reverse	0	0.057877	0	0	0	0	0	0	0.039034	0	0	0	0	0	0.107393	0.244472	0	0	0.097694
Pl06G0000118700.v1	Pl06	16973058	16974062	Forward	0.668177	0.984636	1.83717	2.11883	2.33933	4.11165	0	0	0.0772	0	0	0	0.208061	0.42085	0.297038	0.568529	0	0.789422	0.816588
Pl06G0000135900.v1	Pl06	19103238	19104304	Forward	0	0	0	0	0	0	0	0	0	0	0	0	0	0	0	0	0	0	0
Pl06G0000139400.v1	Pl06	19393379	19394253	Reverse	0.575146	0.538932	0.740147	0.407137	0.554238	0	0.181501	0	0.469365	0	0.175571	0	0.435253	0.881204	2.03272	0	0	0	0.33231
Pl06G0000176800.v1	Pl06	22923845	22925014	Forward	0	0	0	0	0	0	0	0	0	0	0	0	0	0	0	0	0	0	0
Pl06G0000176900.v1	Pl06	22925266	22926369	Forward	0	0	0.011983	0	0	0	0.01897	0	0	0.007198	0	0	0	0	0	0	0.190772	0	0.019399
Pl06G0000195400.v1	Pl06	24669574	24670677	Reverse	0	0	0	0	0	0	0	0	0	0	0	0	0	0	0.073946	0	0	0	0.0401
Pl06G0000249700.v1	Pl06	29235020	29236189	Reverse	0	0	0	0	0	0	0	0.063163	0	0	0	0.001594	0	0	0	0	0	0	0
Pl06G0000299400.v1	Pl06	33403414	33407187	Forward	0.286766	0.167029	0.132271	0.175312	0.286097	0.271627	0.334037	0.530998	0.425303	0.04097	0	0.231214	0.027844	0.014857	0.240444	0.102917	3.43972	0	0.235234
Pl06G0000299500.v1	Pl06	33410043	33412715	Forward	11.561	10.5963	11.8278	4.73848	5.89348	6.3634	14.0079	12.4723	14.9206	8.14967	7.89507	5.81356	12.4409	11.1162	22.7803	3.08757	1.43436	0	4.09389
Pl06G0000299600.v1	Pl06	33427384	33431198	Forward	29.8701	27.9217	28.978	4.22494	3.8737	3.06563	14.2453	15.4828	12.6168	0.246256	0	0.244815	18.048	54.6255	75.794	0	0	0	0
Pl06G0000299700.v1	Pl06	33436152	33440089	Reverse	5.10136	5.81065	5.43069	0.547333	0.519599	0.772404	2.71119	2.48295	2.73902	0	0	0	1.84223	12.0433	0	0	0	0	0
Pl06G0000299800.v1	Pl06	33442909	33443703	Forward	0	0.211945	0	0	0.15342	0	0.680521	0.415213	0.58854	0	0.221522	0	0.19556	0.100011	0.035568	0	0	0	0
Pl06G0000299900.v1	Pl06	33448166	33449437	Reverse	1.76203	1.53462	2.58313	1.99901	2.45223	2.85293	2.56019	2.47506	3.25871	1.98403	3.1605	3.85318	1.26493	1.67191	2.10594	12.3965	34.5631	7.29459	5.0309
Pl06G0000300000.v1	Pl06	33461386	33463515	Forward	1.21516	2.75389	1.94531	1.03734	2.04107	1.26611	2.45465	2.42732	3.07399	0.810398	0.963002	0.368405	4.60135	0.604253	0	0	0	0	0
Pl06G0000300100.v1	Pl06	33471750	33474513	Forward	6.78769	6.54723	8.15373	10.7446	10.4888	10.2698	9.63084	9.67269	8.61989	6.37688	7.04882	6.65811	7.62009	6.01029	9.79561	3.01999	0.89249	1.9456	1.58612
Pl06G0000300200.v1	Pl06	33477785	33478409	Reverse	23.1008	30.4563	27.6115	30.949	29.8383	26.6085	20.3851	16.6294	20.1821	21.0066	20.4626	21.344	19.3071	18.8444	9.16782	13.1195	4.48549	10.8047	11.5614
Pl06G0000303700.v1	Pl06	33736127	33738650	Reverse	0	0.008307	0	0	0	0	0	0	0.010546	0	0	0	0	0	0	0	0.07996	0	0
Pl06G0000312600.v1	Pl06	34469869	34472373	Forward	0	0	0	0	0	0	0	0	0	0	0	0	0	0	0	0	0	0	0
Pl07G0000052700.v1	Pl07	4063071	4066198	Reverse	1.19005	1.20401	1.36032	3.06527	2.67253	2.83209	0.992833	0.801587	0.597777	0.090257	0.323002	0.054145	0.157505	0.957055	0.636375	9.17351	57.6798	0.903731	0.380009
Pl07G0000074000.v1	Pl07	6264213	6266719	Forward	0	0	0	0	0	0	0	0	0	0	0	0.015023	0	0	0	0.019059	0	0	0
Pl07G0000076300.v1	Pl07	6464993	6466761	Forward	0	0	0.070125	0	0.051721	0	0	0	0	0	0	0	0	0	0	0	0	0	0
Pl07G0000100300.v1	Pl07	9088218	9089303	Reverse	0	0	0	0	0	0	0	0	0	0	0	0	0	0	0	0	0	0	0
Pl07G0000103900.v1	Pl07	9440743	9440989	Forward	11.7464	19.6446	19.5093	21.3707	20.6028	21.6381	0	0.800992	0.522936	0	0	0	0.975784	0	0	0	0	0	0
Pl07G0000113300.v1	Pl07	10678476	10680280	Reverse	0	0	0	0	0	0	0	0	0	0	0	0	0	0	0	1.86542	0	0	0
Pl07G0000115000.v1	Pl07	10957183	10959166	Reverse	0	0	0	0	0	0	0	0	0	0	0	0	0	0	0	0	0	0	0
Pl07G0000122900.v1	Pl07	11905015	11905257	Forward	0	0	0	0	0	0	0	0	0	0	0	0	0	0	0	0	0	0	0
Pl07G0000148000.v1	Pl07	15050093	15052681	Forward	0	0	0	0	0	0	0	0	0	0	0	0	0	0	0	0	0	0	0
Pl07G0000164600.v1	Pl07	17917257	17919888	Reverse	0	0	0	0	0	0	0	0	0	0	0	0	0	0	0	0	0	0	0
Pl07G0000197900.v1	Pl07	24554032	24555567	Forward	0	0	0	0	0	0	0	0	0	0	0	0	0	0	0	0	0	0	0
Pl07G0000217300.v1	Pl07	27908725	27910228	Forward	0	0	0	0	0	0	0	0	0	0	0.137552	0	0	0	0	0	0	0	0
Pl07G0000219300.v1	Pl07	28280157	28282040	Forward	0	0	0	0	0	0	0	0	0	0	0	0	0	0	0	0	0	0	0
Pl07G0000226100.v1	Pl07	29126379	29126591	Reverse	0	0	0	0	0	0	0	0	0	0	0	0	0	0	0	0	0	0	0
Pl07G0000246300.v1	Pl07	31539335	31541083	Reverse	0	0	0	0	0	0	0	0	0	0	0	0	0	0	0	0	0	0	0
Pl07G0000249800.v1	Pl07	32044429	32047100	Forward	0.03813	0	0	0	0	0	0.010153	0	0.014109	0	0	0	0	0	0.117072	0	0	0	0.048933
Pl07G0000261200.v1	Pl07	33511615	33514931	Reverse	0	0	0	0	0	0	0	0.238637	0.25793	0.320701	0.381137	0.326535	0.74556	0.145385	0.18088	0	0	0	0
Pl07G0000273900.v1	Pl07	35019354	35019521	Forward	0	0	0	0	0	0	0	0	0	0	0	0	0	1.63014	0	0	0	0	0
Pl07G0000278800.v1	Pl07	35529253	35529996	Forward	0.003166	0.2181	0	0	0	0	0	0	0	0	0	0	0	0	0	0	0	0	0
Pl07G0000330900.v1	Pl07	40895765	40896091	Reverse	0.203324	0.39876	0.302547	0.3312	1.01338	0.64797	0.874364	0.686975	0.68118	0.804529	0.359602	0.479691	0.232222	0.422559	0.312358	0.214763	0.083116	0.245876	0.241168
Pl07G0000331000.v1	Pl07	40896684	40898057	Reverse	0.11101	0.042101	0.20283	0.218642	0.117	0.129246	0.076716	0.153465	0.204251	0.40577	0.294881	0.082274	0.441796	0.053629	0.25943	0.414434	0.092655	0.836672	0.525249
Pl07G0000387200.v1	Pl07	46291527	46293567	Reverse	1.79457	0.994746	1.13938	0.930371	0.841327	1.21225	0.513955	0.849982	0.95739	0	0	0	0.408647	0	0	0	0	0	0
Pl07G0000397200.v1	Pl07	47208885	47210480	Reverse	0	0	0	0	0	0	0	0	0	0	0	0	0	0	0	0	0	0	0.056186
Pl08G0000002200.v1	Pl08	152888	153454	Reverse	0	0	0	0	0	0.20783	38.7158	48.8291	41.993	32.6897	37.0138	31.5296	45.4338	26.9462	46.2595	5.47549	2.38469	12.5662	9.3205
Pl08G0000014300.v1	Pl08	1201702	1203237	Forward	0.001917	0.001707	0	0	0	0.002008	0.001591	0	0	0	0	0	0	0	0	0	0	0	0
Pl08G0000041900.v1	Pl08	3298599	3304527	Reverse	0.763571	0.754102	0.799214	1.01348	0.82414	1.15783	0.649594	0.610559	0.366015	1.40756	0.939795	0.660515	1.21944	14.1634	0	1.40664	0.303659	1.33903	1.52021
Pl08G0000042000.v1	Pl08	3305757	3307877	Reverse	0	0	0	1.92282	1.54488	1.52595	0.501109	0.630409	0.637133	2.01594	1.11539	1.58163	0.983384	0.178471	0	0	0	0	0
Pl08G0000042100.v1	Pl08	3321337	3323796	Reverse	0	0	0	0	0	0	0	0	0	2.15489	1.77486	2.59748	0	0	0	0	0	0	0
Pl08G0000070200.v1	Pl08	5922730	5927160	Reverse	0	0	0	0	0	0	0	0	0.135683	0.322747	0.212372	0	0.902909	0	0	0	0	0	0
Pl08G0000070300.v1	Pl08	5930951	5931307	Reverse	0.773223	0.37112	0.810194	1.39213	4.2617	5.20732	0	0	0.056626	1.72134	0.910424	0.516569	1.49768	0	0	0	0	0	0
Pl08G0000080100.v1	Pl08	6872604	6873737	Reverse	0	0.060113	0.070656	0.759532	1.27958	1.1215	5.23654	5.87918	6.83037	6.89139	7.05917	8.39404	1.89474	3.47169	0.118667	0	7.14923	0	0
Pl08G0000110200.v1	Pl08	10025681	10026541	Forward	0	0	0.055841	0.400755	0	0.04631	0	0	0	0	0	0.064127	0	0	0	0	0	0	0
Pl08G0000110300.v1	Pl08	10029219	10031722	Forward	0	0	0	0	0	0	0	0	0.009805	0	0	0	0	0	0	0	0	0	0
Pl08G0000128800.v1	Pl08	12031919	12033291	Forward	0	0	0	0	0	0	0	0	0	0	0	0	0	0	0	0	0	0	0
Pl08G0000148900.v1	Pl08	14739083	14739924	Forward	0	0	0	0	0	0	0	0.046154	0	0	0	0	0	0.759102	0	0	0	0	0
Pl08G0000149000.v1	Pl08	14741300	14743776	Forward	0	0	0	0	0	0	0	0.068984	0	0	0	0	0	0	0	0	0	0	0
Pl08G0000158100.v1	Pl08	16013598	16013807	Forward	0	0	0	0	0	0	0	0.267438	0.270608	0.123992	0.412386	0.837384	0.845879	0	0.175207	0.163629	0.190876	0	0
Pl08G0000158200.v1	Pl08	16017898	16019697	Reverse	0	0	0	0	0	0	0.142024	0.02648	0.127446	0.214792	0.103441	0.197538	0.273037	0	0.478035	0.31282	0.212809	1.03968	0.654097
Pl08G0000161600.v1	Pl08	16526942	16528351	Forward	0	0	0	0	0	0	0	0	0	0	0	0	0	0	0	0	0	0	0
Pl08G0000164200.v1	Pl08	16839621	16841272	Reverse	0	0	0	0	0	0	0	0	0	0	0	0	0	0	0	0	0	0	0
Pl08G0000167100.v1	Pl08	17257552	17259830	Reverse	0	0	0	0	0	0	0	0	0	0	0	0	0	0	0	0	0	0	0
Pl08G0000170700.v1	Pl08	17873094	17878206	Forward	0	0	0	0	0	0	0	0	0	0	0	0	0	0	0	0	0	0	0
Pl08G0000170800.v1	Pl08	17886106	17886969	Forward	1055.72	1058.53	1079.56	108.391	114.694	118.123	551.969	598.287	555.904	10.929	11.229	10.3875	274.509	1794.73	703.763	0	0	0.714384	0
Pl08G0000170900.v1	Pl08	17898832	17911426	Forward	3.71537	2.81473	3.0238	1.72354	2.72293	2.88951	5.03246	4.95106	5.74339	2.99193	3.5827	4.14287	5.38501	1.65271	4.20657	0.180515	0.252435	1.35357	0.348697
Pl08G0000171000.v1	Pl08	17912174	17913618	Reverse	0	0	0	0.145095	0	0	0.419573	0.447379	0.766378	0.357054	0	0.156588	8.83931	0	0	0	0	0	0
Pl08G0000175100.v1	Pl08	18668424	18670948	Reverse	0	0.008708	0	0	0	0	0	0	0.009965	0	0.007972	0	0	0	0	0	0.098427	0	0
Pl08G0000183000.v1	Pl08	20132155	20133528	Forward	0.099834	0.168983	0	0	0	0	0.137937	0.055667	0	0	0	0	0	0.134083	0	0	0	0	0
Pl08G0000197900.v1	Pl08	23569297	23570205	Reverse	0	0	0	0	0	0	0	0	0	0	0	0	0	0	0	0	0	0	0
Pl08G0000224900.v1	Pl08	30741121	30743078	Reverse	0	0	0	0	0	0	0	0	0	0	0	0	0	0	0	0	0	0	0
Pl08G0000243200.v1	Pl08	35103998	35107202	Forward	0.123473	0.222608	0.246224	0.27316	0.192718	0.18313	0.224463	0.319149	0.244008	0.286125	0.492861	0.294672	0.298427	0.329457	0.187481	0.216752	0.32996	0	0.510544
Pl08G0000243600.v1	Pl08	35230807	35231954	Forward	0	0	0	0	0	0	0	0	0	0	0	0	0.045014	0	0	0	0	0	0
Pl08G0000244900.v1	Pl08	35465548	35468238	Reverse	0	0	0	0	0	0	0.0188	0.009377	0	0.010077	0	0.079414	0	0.009087	0	0.05939	0	0	0.095864
Pl08G0000279900.v1	Pl08	41587326	41588221	Forward	0	0.112364	0	0	0.318951	0.161991	9.44281	8.45627	8.85509	0.304634	1.76752	1.62938	7.01307	7.77934	14.6388	0	0	0	0
Pl08G0000280000.v1	Pl08	41587981	41589152	Forward	0	0	0	0	0	0	0	0	0.076211	0	0	0	0	0	0.301103	0	0	0	0
Pl08G0000287500.v1	Pl08	42579782	42580585	Forward	0	0	0	0	0	0	0	0	0	0	0	0	0	0	0	0	0	0	0
Pl08G0000297800.v1	Pl08	44107019	44115916	Reverse	0	0	0	0	0	0	0	0	0	0	0	0	0	0	0	0	0	0	0
Pl08G0000301000.v1	Pl08	44445213	44447583	Forward	0	0	0	0	0	0	0	0	0	0	0	0	0	0	0	0	0.266525	0	0
Pl08G0000302500.v1	Pl08	44734982	44737787	Reverse	0	0	0	0	0	0	0	0	0	0	0	0	0	0	0	0	0	0	0
Pl08G0000310500.v1	Pl08	45837911	45838117	Forward	0	0	0	0	0	0	2.99383	1.67494	1.4684	0.9038	0.508903	1.64957	0.163867	1.31798	0.800679	0	0	0	0.332747
Pl08G0000311000.v1	Pl08	45942682	45944962	Forward	0.017302	0.019182	0	0	0	0	0	0	0	0	0	0	0	0	0	0	0	0	0
Pl08G0000326400.v1	Pl08	47751470	47753958	Forward	0	0	0	0	0	0	0	0	0	0	0	0.077657	0	0	0	0	0	0	0
Pl08G0000332200.v1	Pl08	48380192	48382757	Reverse	0	0	0	0	0	0	0.854965	0.415726	0.292747	0.378199	0.448093	0.277081	0.222817	0	0.209369	0	0	0	0.017015
Pl08G0000367300.v1	Pl08	51427951	51429054	Forward	0	0	0	0	0	0	0	0	0	0	0	0	0	0	0	0	0	0	0
Pl08G0000379500.v1	Pl08	52713685	52716285	Forward	0	0	0	0	0	0	0	0	0	0	0.060453	0	0	0	0	0	0	0	0
Pl08G0000379600.v1	Pl08	52721541	52722380	Reverse	1.40824	1.22404	0.315442	0.535299	0.552213	0.499582	0.120484	0	0.061028	0	0	0	0	0	0	0	0	0	0
Pl08G0000379700.v1	Pl08	52722450	52723133	Reverse	1.4365	1.42464	0.989522	1.78158	0.550891	0.419202	0.09621	0	0	0	0	0	0	0	0	0	0	0	0
Pl08G0000438000.v1	Pl08	57208705	57211678	Forward	0	0	0	0	0	0	0	0	0	0	0	0	0	0	0	0	0	0	0
Pl09G0000040100.v1	Pl09	3050585	3050677	Reverse	0.221624	0.060142	0	0.249952	0.202899	0	0.213928	0	0.253268	0.21964	0.243222	1.9786	1.27797	1.85236	0.714328	1.17004	3.22207	4.93398	1.17542
Pl09G0000072500.v1	Pl09	5888186	5890268	Reverse	0	0	0	0	0	0	0	0	0	0	0	0	0	0	0	0	0.078129	0	0
Pl09G0000074000.v1	Pl09	5996399	5997496	Reverse	0	0	0	0	0	0	0	0	0	0	0	0	0	0	0	0	0	0	0
Pl09G0000077300.v1	Pl09	6298546	6302965	Reverse	0	0.011864	0	0	0.000619	0	1.34553	1.1626	0.89331	3.55438	3.81231	4.0888	0.825338	0.253928	0.006885	0.073868	0.250328	0.008268	0.010827
Pl09G0000105800.v1	Pl09	9376675	9379198	Forward	0	0	0	0	0	0	0.011259	0	0.012055	0	0	0	0	0	0	0	0.030223	0	0
Pl09G0000128500.v1	Pl09	11904448	11905691	Reverse	0	0	0	0	0	0	0	0	0	0	0	0	0	0	0	0	0	0	0
Pl09G0000156100.v1	Pl09	15058747	15061271	Reverse	0	0.007888	0	0	0	0	0	0	0.009965	0	0.007982	0	0	0	0	0	0.056406	0	0
Pl09G0000177300.v1	Pl09	17665649	17666115	Reverse	0	0	0	0	0	0	4.53828	2.91866	5.81937	4.82196	5.19027	6.56162	6.38382	6.16701	4.58932	0	0	0	0
Pl09G0000177400.v1	Pl09	17666611	17667596	Reverse	0	0	0	0	0	0	2.66401	1.83611	2.46047	1.35451	1.26087	1.78529	1.37936	0.478329	1.9038	0	0	0	0
Pl09G0000184300.v1	Pl09	18666614	18667050	Forward	0	0	0	0	0	0	0	0	0	0	0	0	0	0	0	0	0	0	0
Pl09G0000195900.v1	Pl09	20531233	20532336	Reverse	0	0	0	0	0	0	0	0	0	0	0	0	0	0	0	0	0	0	0
Pl09G0000196000.v1	Pl09	20532893	20534160	Reverse	0	0	0	0	0	0	0	0	0	0	0	0	0	0	0	0	0	0	0
Pl09G0000226000.v1	Pl09	25415453	25417871	Reverse	0	0	0	0	0	0	0	0.095008	0	0	0	0	0	0	0	0	0	0	0
Pl09G0000249000.v1	Pl09	28563970	28564893	Forward	0	0	0.094832	0	0	0	0	0	0	0	0	0	0	0.023468	0	0	0	0	0
Pl09G0000259400.v1	Pl09	30135999	30136556	Reverse	0.021371	0	0	0.027407	0	0	0	0	0.003465	0.01424	0	0	0	0	0	0	0.086027	0	0
Pl09G0000259500.v1	Pl09	30136622	30138522	Reverse	0	0.011574	0	0	0	0	0	0	0.013175	0	0	0	0	0	0	0	0.052801	0	0
Pl09G0000260500.v1	Pl09	30218906	30219766	Reverse	0	0	0	0	0	0	0	0	0	0	0	0	0	0	0	0	0	0	0
Pl09G0000298400.v1	Pl09	35139275	35140268	Forward	0	0	0	0.003884	0	0	0	0	0	0	0	0	0	0	0	0.004545	0.004656	0	0
Pl09G0000350400.v1	Pl09	40153431	40153900	Reverse	0	0	0	0	0	0	0	0	0	0	0	0	0	0	0	0	0	0	0
Pl10G0000003200.v1	Pl10	226772	228542	Reverse	0	0	0	0	0	0	1.01713	2.00417	1.76074	2.34794	2.13635	2.76825	1.48754	0.716977	0.260106	0	0	0	0
Pl10G0000038000.v1	Pl10	3999738	4003712	Forward	0.520204	0.834814	0.508379	1.10127	0.878163	1.29046	0.96338	0.874847	1.41022	1.91277	1.98679	1.93472	1.90151	2.17568	0.584965	3.31282	2.96743	0.243569	0.177234
Pl10G0000038900.v1	Pl10	4098851	4100828	Reverse	0	0	0	0	0	0	0	0	0	0	0	0	0	0	0.051618	0	0	0	0
Pl10G0000046600.v1	Pl10	5076716	5079123	Forward	1.26355	1.26131	1.55765	3.14789	2.66371	2.98359	0.242775	0.5857	0.490229	0.720295	0.641055	0.762751	1.31919	0.691063	0.180297	1.37085	0.599329	1.46952	0.987796
Pl10G0000046700.v1	Pl10	5076804	5080493	Forward	3.24676	2.27035	3.99311	8.0195	7.4689	6.47676	2.4161	2.09442	2.56836	4.55727	4.63829	4.83933	2.1624	1.99153	0.244431	0.367719	0.13698	0	0.908921
Pl10G0000053400.v1	Pl10	5923839	5924527	Reverse	0.201976	0	0.065817	0.065729	0.125467	0.256883	0	0.028129	0.122909	0.336044	0.119579	0.258675	0.05086	0.193132	0.046797	0.04353	0.173686	0	0.072933
Pl10G0000054700.v1	Pl10	6098905	6099114	Forward	5.36167	4.34808	2.50355	1.57301	2.87798	3.57715	0	0	0	0	0	0	0	0	0	0	0	0	0
Pl10G0000054800.v1	Pl10	6099670	6104137	Reverse	7.59694	5.92753	6.65859	3.88227	2.8574	3.10522	0.07912	0	0.027534	0	0	0	0	0	0	0	0	0.061077	0
Pl10G0000056300.v1	Pl10	6332768	6334382	Reverse	0	0	0	0	0	0	0	0	0	0	0	0	0	0	0	0	0	0	0.155486
Pl10G0000056400.v1	Pl10	6338919	6340649	Reverse	0	0	0	0.158556	0.124651	0.229562	0	0	0	0	0.028002	0	0	0	0.03267	0	0.433832	0	0.063473
Pl10G0000056500.v1	Pl10	6340747	6342129	Reverse	0	0	0	0	0	0.085125	0	0	0	0	0	0	0	0	0	0	0.096493	0	0
Pl10G0000075900.v1	Pl10	9513505	9516031	Forward	0	0.108577	0	0	0	0	0	0	0	0	0	0	0	0	0	0	0	0	0
Pl10G0000098900.v1	Pl10	13042379	13043666	Forward	0.683024	0.694186	0.524231	0.330349	0.233186	0.258876	1.96215	1.49825	2.05177	2.11477	2.27567	2.03419	1.62102	0.392964	2.10768	2.18855	0.63381	0	0.588638
Pl10G0000104000.v1	Pl10	13987957	13989671	Forward	0	0	0	0	0	0	0.106832	0	0	0	0	0	0	0	0	0	0	0	0
Pl10G0000106200.v1	Pl10	14267045	14268983	Forward	0	0	0	0	0	0	0	0	0	0	0	0	0	0	0	0	0	0	0
Pl10G0000106300.v1	Pl10	14274473	14275919	Forward	0	0	0	0	0	0	0	0	0	0	0	0	0	0	0	0	0	0	0
Pl10G0000150200.v1	Pl10	22641803	22642105	Reverse	0	0	0	0	0	0	19.7295	19.6133	19.0456	20.2921	23.2366	22.5741	16.1061	10.5327	4.34226	6.22711	1.72354	0	1.69894
Pl10G0000150500.v1	Pl10	22679755	22683223	Forward	0	0	0	0	0	0	0	0	0	0	0	0	0	0	0	0	0	0	0
Pl10G0000150900.v1	Pl10	22724679	22725774	Forward	0	0	0	0	0	0	0	0	0	0.248923	0	0	0	0	0	0	0	0	0
Pl10G0000186000.v1	Pl10	28673130	28674410	Forward	1.5353	2.27976	1.91398	1.21398	1.64202	1.72424	0	0	0.023725	0	0	0	0	0	0	0	0	0	0
Pl10G0000186100.v1	Pl10	28694315	28699398	Forward	0	0.000877	0	0	0	0	0	0	0	0	0	0	0	0	0	0	0	0	0
Pl10G0000186200.v1	Pl10	28699645	28702442	Reverse	0	0	0	0	0.062403	0	0	0	0.011408	0	0	0	0	0	0	0	0	0	0
Pl10G0000190900.v1	Pl10	29912844	29913388	Forward	0	0	0	0	0	0	0	0	0	0	0	0	0	0	0	0	0	0	0
Pl10G0000193900.v1	Pl10	30342397	30343992	Reverse	0	0	0	0.075152	0	0	3.62698	2.12095	3.18753	3.61265	3.01802	3.22324	3.22202	1.61045	2.84504	1.5718	0.771026	1.20935	0.528497
Pl10G0000219900.v1	Pl10	35943487	35943887	Forward	2.84457	1.69122	2.58051	0.15255	0.362812	0.628998	0	0.171496	0	0	0	0	0	0	0	0	0	0	0
Pl10G0000221500.v1	Pl10	36511069	36511964	Forward	0	0	0	0	0	0	0	0	0	0	0	0	0	0	0	0	0	0	0
Pl10G0000223400.v1	Pl10	37388404	37391119	Reverse	0	0	0	0	0	0	10.6625	11.1218	10.1742	9.17469	11.3948	9.21604	8.03096	2.26869	4.8606	6.89162	2.96156	1.91756	1.6495
Pl10G0000232600.v1	Pl10	39598060	39598470	Reverse	21.1816	19.6125	14.1192	6.62231	3.12798	3.12105	23.8159	22.8728	28.8201	10.8296	10.1077	10.9829	1.26065	5.74691	20.4113	26.9171	2.83921	8.5265	8.12769
Pl10G0000237200.v1	Pl10	40171432	40172634	Reverse	0	0	0	0	0	0	0	0	0	0	0	0	0	0	0	0	0	0	0
Pl10G0000239800.v1	Pl10	40467231	40469699	Reverse	0	0	0	0	0	0	0	0	0	0	0	0	0	0	0	0	0	0	0
Pl10G0000293800.v1	Pl10	47677259	47677464	Reverse	0.006072	0.172413	0.682502	0.133026	0.052802	0.103235	0.65745	0.358666	0.633668	0.770271	0.714248	0.429805	0.423002	0.761209	0.496554	0.034454	0.013062	0.01887	0.028319
Pl10G0000294700.v1	Pl10	47748175	47750063	Reverse	0	0.01251	0	0.01668	0	0	0.245173	0	0.108363	0	0.224982	0	0.054191	0	0	0	0	0	0.022363
Pl10G0000308000.v1	Pl10	49325277	49328242	Forward	0	0	0	0	0	0	9.06346	11.334	7.58257	14.6767	10.3321	15.2115	1.46413	0.39232	0	1.83307	0.009411	0	0.510344
Pl10G0000308100.v1	Pl10	49325277	49329363	Forward	0	0.020614	0	0	0	0.01752	2.25274	1.34795	3.58751	1.34781	3.78107	1.47836	0.279928	0.147526	0.578381	1.27268	3.2891	0	0.778691
Pl11G0000102500.v1	Pl11	8540444	8544167	Reverse	0	0	0	0	0	0	0.272141	0.250559	0.347255	0.101984	0.121361	0	0.779765	66.9004	0	0	0	0	0
Pl11G0000102700.v1	Pl11	8571130	8573391	Reverse	0	0	0	0	0	0	0	0	0	0	0	0	0	0	0	0	0	0	0
Pl11G0000102800.v1	Pl11	8577641	8578295	Reverse	0	0	0	0	0	0	0	0	0	0	0	0	0	0	0	0	0	0	0
Pl11G0000111400.v1	Pl11	9630862	9632882	Reverse	1.43128	1.63875	0.938409	0.743795	0.912593	1.2414	0	0	0	0	0	0	0	0	0	0	0	0	0
Pl11G0000111500.v1	Pl11	9637449	9640143	Forward	3.3907	4.70805	3.31043	3.53258	3.91691	4.40401	0	0.10015	0	0	0	0	0	0	0	0	0	0	0
Pl11G0000114500.v1	Pl11	9980427	9981509	Reverse	0	0	0	0	0	0	0	0	0	0	0	0.085702	0	0.010011	0	0	0	0	0
Pl11G0000114600.v1	Pl11	9981762	9982931	Reverse	0	0	0	0	0	0	0	0	0	0	0	0	0	0	0	0	0	0	0
Pl11G0000116600.v1	Pl11	10363419	10364478	Forward	0	0	0	0.514838	1.05692	2.31743	0	0	0.258276	0.360576	0.534534	0	0.475125	0	0	0	0	0	0
Pl11G0000134000.v1	Pl11	12486444	12489128	Forward	0	0	0	0	0	0	0	0	0	0	0	0	0	0	0	0	0	0	0
Pl11G0000135900.v1	Pl11	12742399	12744455	Reverse	3.06344	2.92591	2.66489	0.757262	1.24679	1.1865	0	0	0	0	0	0	0	0	0	0	0	0	0
Pl11G0000143200.v1	Pl11	13612429	13614107	Forward	0	0	0	0	0	0	0.014574	0	0	0	0.010869	0	0	0	0	0	0.139965	0	0
Pl11G0000161200.v1	Pl11	15877106	15881994	Reverse	11.3064	10.567	9.43265	16.9731	15.9533	18.6427	12.9443	13.2656	12.6432	18.8123	18.3061	16.5337	21.0845	25.4941	17.9514	38.3193	54.5555	16.9177	14.859
Pl11G0000164000.v1	Pl11	16328076	16328936	Reverse	0	0	0	0	0	0	0	0	0	0	0	0	0	0	0	0	0	0	0
Pl11G0000164100.v1	Pl11	16329519	16330364	Reverse	0	0	0	0	0	0	0	0	0	0	0	0	0	0	0	0	0	0	0
Pl11G0000205100.v1	Pl11	23565202	23567245	Forward	0	0	0	0	0	0	0	0	0	0	0	0	0	0	0	0	0	0	0
Pl11G0000222100.v1	Pl11	26092700	26093593	Reverse	0	0	0	0	0	0	0	0	0	0	0	0	0	0	0	0	0	0	0
Pl11G0000223800.v1	Pl11	26365892	26372464	Forward	0	0	0	0	0	0	0	0	0	0.004741	0	0	0	0	0	0	0	0	0
Pl11G0000233100.v1	Pl11	27612901	27614080	Forward	0	0	0	0	0	0	0	0	0	0	0.081679	0	0	0	0	0	0	0	0
Pl11G0000233200.v1	Pl11	27614332	27615414	Forward	0	0	0	0	0	0	0	0	0	0	0	0.043385	0	0.010011	0	0	0	0	0
Pl11G0000255600.v1	Pl11	31490523	31491068	Reverse	4.04005	2.6308	3.1054	2.02639	1.50961	2.51004	0	0	0	0	0	0	0.088247	0.110319	0.173771	0.08231	0	0	0.18795
Pl11G0000258900.v1	Pl11	32040903	32042972	Reverse	0	0	0	0	0	0	0	0	0.015368	0	0	0	0	0	0	0	0	0	0
Pl11G0000260300.v1	Pl11	32186213	32186691	Reverse	0	0	0	0	0	0	0	0	0	0	0	0	0	0	0	0	0	0	0
Pl11G0000263200.v1	Pl11	32588610	32589269	Forward	0	0	0	0	0	0	0	0	0	0	0.079588	0	0	0	0	0	0	0	0
Pl11G0000266400.v1	Pl11	33019776	33022117	Forward	0	0	0	0	0	0	0	0	0	0	0	0	0	0	0	0	0	0	0
Pl11G0000275200.v1	Pl11	33948340	33949150	Forward	0	0	0	0	0	0	0	0	0	0	0	0	0	0	0	0	0	0	0
Pl11G0000276300.v1	Pl11	34040687	34042314	Reverse	0	0	0	0	0	0	0.309677	0.080501	0.247411	0.683496	1.19476	0.923851	0.110742	0.432516	0.257029	0	0	0	0.070462
Pl11G0000287300.v1	Pl11	35310128	35310684	Forward	0	0	0.055732	0	0	0	0	0	0	0	0	0	0	0	0	0	0	0	0
Pl11G0000293000.v1	Pl11	35828648	35830922	Forward	0	0	0	0	0	0	0	0	0	0	0	0	0	0	0	0	0	0	0
Pl11G0000298700.v1	Pl11	36629795	36630366	Forward	0	0	0	0	0	0	0	0	0	0	0	0	0	0	0	0	0	0	0
Pl11G0000300500.v1	Pl11	36835220	36837024	Reverse	0	0	0	0	0	0	0	0	0	0	0	0	0	0	0	0	0	0	0
Pl11G0000308700.v1	Pl11	37792860	37795711	Reverse	0	0	0	0	0	0	0	0	0	0	0	0	0	0	0	0	0	0	0
Pl11G0000325400.v1	Pl11	40140562	40141739	Forward	0	0	0	0	0	0	0	0	0	0	0	0	0	0	0	0	0	0	0
Pl11G0000337100.v1	Pl11	41663296	41665505	Reverse	0	0	0	0	0	0	0.214126	0	0	0	0	0.04362	0	0	0	0	0	0	0
Pl11G0000343300.v1	Pl11	42538352	42539546	Forward	0	0.157434	0	0	0	0	10.4281	13.6002	12.1677	15.6775	13.0665	15.0531	21.5374	8.49738	16.1441	0	0	0	0
Pl11G0000345800.v1	Pl11	42775795	42779418	Reverse	0.4541	0.962053	0.368357	0.754146	1.04384	1.35828	1.23464	0.982514	1.03168	2.5038	1.67292	1.73405	1.61689	0.546356	0.418655	0.34721	0.185142	0	0.124867
Pl11G0000345900.v1	Pl11	42785642	42789129	Forward	0.421218	0.362819	0.13087	0	0	0	0	0	0	0	0	0	0	0	0	0	4.40738	0	0
Pl11G0000346000.v1	Pl11	42792256	42794008	Forward	0.517211	0.60711	0.767113	1.0049	0.619609	0.819932	0	0.038418	0	0.127917	0	0	0.130635	0	0	0	0	0	0
Pl11G0000346100.v1	Pl11	42796700	42799692	Reverse	0	0	0	0	0	0	0	0	0	0	0	0	0	0	0	0	0	0	0
Pl11G0000382700.v1	Pl11	46290022	46291125	Reverse	0	0	0	0.011082	0	0	0.025293	0	0	0	0.075516	0	0	0	0.015738	0	0	0	0.033342
Pl11G0000382800.v1	Pl11	46291438	46292613	Reverse	0	0	0	0.092074	0	0	0	0.017821	0	0	0	0	0	0	0	0	0	0	0
tig000018820110.v1	tig00001882	215205	216062	Forward	0	0.393388	0.371786	0	0	0	0	0	0	0	0	0.094647	0	0	0	0	0	0	0
tig00001998A410.v1	tig00001998A	867966	870548	Forward	0	0	0	0	0	0	0.204346	0	0	0	0	0	0	0	0	0	0	0	0
tig00001998A640.v1	tig00001998A	1355076	1356048	Reverse	0	0	0	0	0	0	0	0	0	0	0	0	0	0	0	0	0	0	0
tig000020210230.v1	tig00002021	313323	315414	Reverse	0	0	0	0	0	0	0	0	0	0	0	0	0	0	0	0	0	0	0
tig000020380030.v1	tig00002038	54285	55606	Forward	2.36468	2.1247	2.13778	3.04505	2.38286	1.87499	0.963956	0.986636	0.807906	0.26352	0.721805	0.424399	0.620572	0.314991	0.309498	0.545843	0.051767	0	0.149345
tig000020380040.v1	tig00002038	80093	81226	Reverse	0.858144	1.74203	1.75887	1.02494	1.23111	2.19494	0.077257	0.089752	0.184759	0.445372	0.330262	0.045924	0.356911	0.049575	0.067295	0.01978	0	0	0.096888
tig000020380220.v1	tig00002038	486037	490003	Forward	0	0	0.023169	0.042979	0.013009	0	0	0	0	0	0	0	0	0	0	0	0	0	0
tig000546380280.v1	tig00054638	560456	563721	Reverse	0	0	0	0	0	0	0	0	0	0.007857	0	0	0	0	0	0	0	0	0

## Sheet: SupplTable5_genesSVs_WC_Meso
Location					Orthology P. lunatus Andean					Genotyping		Selection				Expression transcripts per million (TPM) Garcia et al., 2021
Gene ID	Chr	Start	End	Strand	Ortholog ID	Chr	First	Last	Protein Identity	Present G25228	Present G25231	XPCLR	PopGenome	Wild sum Counts	DOM sum counts	WildT1R1	WildT1R2	WildT1R3	WildT2R1	WildT2R2	WildT2R3	DomT1R1	DomT1R2	DomT1R3	DomT2R1	DomT2R2	DomT2R3	DomT2R4	Flower	Leaf	ResistR1	ResistR2	ResistR3	ResistR4
Pl01G0000030000.v1	Pl01	2431426	2431800	Reverse	NF	NF	0	0	0	0	1	0	0	1.22038	1.31401	0.117777	0.279662	0.272761	0.163127	0	0.387051	0	0	0	0	0	0.56661	0	0.38764	0.359757	0.226535	0.130824	0	0.130879
Pl01G0000065300.v1	Pl01	6081157	6084611	Reverse	NF	NF	0	0	0	0	0	0	0	0.015438	1.63347	0	0	0	0	0.015438	0	0	0.024803	0.054815	0.252526	0.680969	0	0.064762	0.555592	0	0	0	0	0
Pl01G0000067800.v1	Pl01	6347542	6348645	Reverse	NF	NF	0	0	0	0	0	0	1	0	0.068314	0	0	0	0	0	0	0	0	0.005677	0	0.062637	0	0	0	0	0.085162	0	0	0.080324
Pl01G0000067900.v1	Pl01	6348950	6350221	Reverse	NF	NF	0	0	0	0	0	0	1	0	0.223069	0	0	0	0	0	0	0	0	0	0	0	0	0.223069	0	0	0	0	0	0
Pl01G0000079900.v1	Pl01	7755718	7756992	Reverse	NF	NF	0	0	0	0	0	1	0	0	82.6182	0	0	0	0	0	0	16.9943	9.9668	9.61689	7.65642	7.98839	7.97773	5.78372	5.2137	11.4202	3.40335	0	0	1.92003
Pl01G0000084900.v1	Pl01	8454059	8454978	Reverse	NF	NF	0	0	0	1	0	0	0	0	0	0	0	0	0	0	0	0	0	0	0	0	0	0	0	0	0	0	0	0
Pl01G0000086000.v1	Pl01	8491977	8492813	Forward	maker-Pl01-exonerate_protein2genome-gene-9.5	Pl01	8851448	8852399	21.37	0	1	0	0	2.32224	18.8396	0.423196	0.172492	0.194305	0.356657	0.846885	0.328708	2.70768	1.74951	1.20096	1.05127	1.12693	3.0857	2.7651	3.57279	1.57966	1.47509	3.10059	7.15111	5.06249
Pl01G0000106400.v1	Pl01	11196698	11197600	Reverse	NF	NF	0	0	0	0	1	0	0	0.255228	0.13065	0.067698	0	0	0.18753	0	0	0	0	0	0	0	0	0	0.065798	0.064852	0	0	0	0
Pl01G0000135600.v1	Pl01	14937691	14939130	Reverse	maker-Pl01-exonerate_protein2genome-gene-21.70	Pl01	21536814	21538300	41.55	1	0	0	0	0	0	0	0	0	0	0	0	0	0	0	0	0	0	0	0	0	0	0	0	0
Pl01G0000142500.v1	Pl01	16048054	16049676	Forward	NF	NF	0	0	0	0	0	0	0	0	0	0	0	0	0	0	0	0	0	0	0	0	0	0	0	0	0	0	0	0
Pl01G0000158900.v1	Pl01	18174526	18176799	Reverse	NF	NF	0	0	0	0	1	0	0	0	0	0	0	0	0	0	0	0	0	0	0	0	0	0	0	0	0	0	0	0
Pl01G0000191500.v1	Pl01	22382922	22385555	Forward	NF	NF	0	0	0	0	1	0	0	0	0	0	0	0	0	0	0	0	0	0	0	0	0	0	0	0	0	0	0	0
Pl01G0000195800.v1	Pl01	23179926	23181797	Reverse	NF	NF	0	0	0	1	0	0	0	0	0.00557	0	0	0	0	0	0	0	0	0.00557	0	0	0	0	0	0	0	0	0	0
Pl01G0000205100.v1	Pl01	24451979	24456907	Reverse	NF	NF	0	0	0	0	1	0	0	0	0	0	0	0	0	0	0	0	0	0	0	0	0	0	0	0	0	0	0	0
Pl01G0000273100.v1	Pl01	34029341	34031493	Forward	maker-Pl01-exonerate_protein2genome-gene-28.42	Pl01	28499108	28501741	51.99	0	1	0	0	4.31827	8.96932	0.202268	0.360923	0.484108	0.803777	1.3866	1.08059	0.878857	1.67918	1.22675	1.2861	1.44702	1.20448	0.925435	0.160733	0.16078	1.06131	0.750595	0	0
Pl01G0000322800.v1	Pl01	39228463	39230154	Reverse	maker-Pl01-exonerate_protein2genome-gene-33.197	Pl01	33818500	33820148	91.59	1	0	0	1	0.143037	63.9945	0	0	0	0	0	0.143037	11.0293	7.8003	9.35934	8.19899	6.3624	5.73344	8.64134	1.98186	4.88758	4.46556	2.86335	1.03157	1.1826
Pl01G0000332500.v1	Pl01	40232280	40234649	Forward	NF	NF	0	0	0	1	0	1	1	0	0.739004	0	0	0	0	0	0	0	0	0	0.119792	0.200033	0.120143	0.043656	0.167609	0.087771	1.01885	1.3081	1.21774	0.340344
Pl01G0000348000.v1	Pl01	41682703	41683415	Forward	NF	NF	0	0	0	0	0	1	1	0	1.22768	0	0	0	0	0	0	0.3854	0	0.048856	0.090722	0.62406	0	0	0.078639	0	0.123687	0.179746	0	0.148726
Pl01G0000390800.v1	Pl01	45183533	45185911	Forward	maker-Pl01-exonerate_protein2genome-gene-40.118	Pl01	39867442	39885892	34.33	0	1	0	0	0	0.587419	0	0	0	0	0	0	0	0	0	0	0	0	0	0.299051	0.288368	0	0	0	0
Pl01G0000390900.v1	Pl01	45188271	45188609	Reverse	NF	NF	0	0	0	0	1	0	0	0.131607	4.83511	0.131607	0	0	0	0	0	0.398621	0.485816	0.456639	0.721442	0.243577	0.464232	0	0.132332	1.93245	0.940041	0	0	1.03306
Pl01G0000394400.v1	Pl01	45504429	45505233	Reverse	NF	NF	0	0	0	0	0	0	0	0	0.113757	0	0	0	0	0	0	0	0	0	0.113757	0	0	0	0	0	0	0	0	0
Pl01G0000398300.v1	Pl01	45827771	45829032	Reverse	maker-Pl01-exonerate_protein2genome-gene-40.185	Pl01	40491486	40491734	62.9	0	0	0	0	8.13812	105.35	2.67635	0.968261	1.3532	0.738417	0.58445	1.81744	1.54931	1.33912	6.7885	2.6133	0.724612	1.67835	6.30425	1.65542	82.6968	849.439	215.973	593.578	738.083
Pl02G0000052400.v1	Pl02	4067424	4071432	Forward	maker-Pl02-exonerate_protein2genome-gene-4.98	Pl02	4087279	4090227	84.72	0	1	0	0	0.031798	0.573332	0	0.031798	0	0	0	0	0	0	0.04307	0	0.015592	0.022626	0	0.066147	0.425897	0	0	0	0
Pl02G0000052800.v1	Pl02	4091674	4092166	Reverse	NF	NF	0	0	0	1	0	0	0	0	0.139443	0	0	0	0	0	0	0.139443	0	0	0	0	0	0	0	0	0	0	0	0
Pl02G0000053000.v1	Pl02	4100166	4103407	Forward	maker-Pl02-exonerate_protein2genome-gene-4.30	Pl02	4176691	4179940	89.87	0	1	0	0	0.439803	7.90374	0	0	0	0.118728	0.167596	0.153479	0.867373	0.431572	0.84914	1.02019	0.913087	3.40435	0.305896	0.060664	0.051467	0	0.332165	0	0
Pl02G0000058200.v1	Pl02	4528079	4532033	Forward	maker-Pl02-exonerate_protein2genome-gene-4.66	Pl02	4607552	4625419	54.29	0	1	0	0	0.535397	1.1548	0.110633	0.14679	0.035139	0.132817	0.110018	0	0.115731	0.155657	0.049065	0.067287	0.09382	0.088535	0.124289	0.087029	0.373383	0	0	0	0
Pl02G0000058300.v1	Pl02	4548458	4549161	Reverse	maker-Pl02-exonerate_protein2genome-gene-4.135	Pl02	4604262	4604766	56.8	0	1	0	0	8.10518	9.99441	1.07183	1.00326	1.64802	1.1153	1.66602	1.60075	0	0.927772	1.31176	1.09997	1.15445	1.60017	0.712439	1.79176	1.3961	0.456291	0.184962	0	0.269426
Pl02G0000058700.v1	Pl02	4580843	4581073	Forward	NF	NF	0	0	0	0	0	0	0	2.13724	3.55383	0.72145	0.47367	0.382278	0.114754	0.102996	0.34209	0.048352	0.531898	0.903436	0.338159	0.477013	0.130759	0.803746	0.139068	0.181401	0.336762	1.30354	0	0
Pl02G0000086500.v1	Pl02	7107720	7107911	Reverse	NF	NF	0	0	0	1	0	0	0	0	0	0	0	0	0	0	0	0	0	0	0	0	0	0	0	0	0	0	0	0
Pl02G0000101400.v1	Pl02	8226331	8227704	Forward	NF	NF	0	0	0	1	0	0	0	0.910076	8.43555	0.031373	0.099395	0.170228	0.214059	0.164321	0.2307	1.33025	1.253	0.940215	0.37504	0.598372	0.268798	1.33625	0.17675	2.15687	0.401441	0.069391	0.196802	0.332082
Pl02G0000101500.v1	Pl02	8228297	8228623	Forward	NF	NF	0	0	0	1	0	0	0	1.05898	28.031	0.164872	0.123154	0.097804	0.037201	0.210462	0.425484	9.51188	4.9375	6.39224	0.996787	1.3536	0.784079	1.40308	0.610121	2.04168	0.326873	0.165347	0	0
Pl02G0000139600.v1	Pl02	12199189	12201019	Forward	maker-Pl02-exonerate_protein2genome-gene-14.66	Pl02	14135853	14137135	50.2	0	1	0	0	0.067297	0	0.03467	0.032627	0	0	0	0	0	0	0	0	0	0	0	0	0	0	0	0	0
Pl02G0000153900.v1	Pl02	13894370	13895422	Reverse	NF	NF	0	0	0	0	1	1	1	0	0.377299	0	0	0	0	0	0	0	0	0	0	0	0.377299	0	0	0	0	0	0	0
Pl02G0000182300.v1	Pl02	17584592	17586038	Forward	NF	NF	0	0	0	0	1	0	0	0	5.17843	0	0	0	0	0	0	0.706716	1.15347	0.591246	0.543977	0.896233	0.737979	0.062369	0.486438	0	0.049714	0	0	0
Pl02G0000182400.v1	Pl02	17592041	17592337	Forward	NF	NF	0	0	0	0	1	0	0	0	1.14686	0	0	0	0	0	0	0.227993	0.298514	0.113037	0.108681	0.204763	0.080659	0	0.113216	0	0.057849	0.066165	0	0
Pl02G0000182500.v1	Pl02	17599518	17600965	Forward	NF	NF	0	0	0	0	1	0	0	0	2.4786	0	0	0	0	0	0	0.36283	0.532708	0.369713	0.266949	0.283151	0.328072	0.101284	0.233897	0	0.067169	0.03633	0	0
Pl02G0000194200.v1	Pl02	19249755	19250526	Reverse	NF	NF	0	0	0	1	0	0	0	0	0	0	0	0	0	0	0	0	0	0	0	0	0	0	0	0	0	0	0	0
Pl02G0000201900.v1	Pl02	20395529	20399965	Reverse	NF	NF	0	0	0	0	0	0	0	0	0	0	0	0	0	0	0	0	0	0	0	0	0	0	0	0	0	0	0	0
Pl02G0000206000.v1	Pl02	21066029	21066792	Forward	NF	NF	0	0	0	0	0	0	0	0	0	0	0	0	0	0	0	0	0	0	0	0	0	0	0	0	0	0	0	0
Pl02G0000208900.v1	Pl02	21608036	21609076	Forward	NF	NF	0	0	0	0	1	0	0	0	0	0	0	0	0	0	0	0	0	0	0	0	0	0	0	0	0	0	0	0
Pl02G0000236800.v1	Pl02	26225395	26231734	Reverse	NF	NF	0	0	0	0	0	0	0	0	0	0	0	0	0	0	0	0	0	0	0	0	0	0	0	0	0	0	0	0
Pl02G0000265800.v1	Pl02	31108211	31109089	Reverse	NF	NF	0	0	0	1	0	1	0	0	1.08054	0	0	0	0	0	0	0	0	0.085426	0.125401	0	0.75127	0.118439	0	0	2.68754	0.359567	0	0
Pl02G0000270600.v1	Pl02	31822766	31823275	Forward	NF	NF	0	0	0	1	0	0	0	0	0	0	0	0	0	0	0	0	0	0	0	0	0	0	0	0	0	0	0	0
Pl02G0000280800.v1	Pl02	33236185	33236942	Reverse	NF	NF	0	0	0	1	0	0	1	0	55.8136	0	0	0	0	0	0	8.36375	8.33016	8.23799	3.87261	6.07184	3.61157	7.41041	2.83799	7.07724	1.90185	0.653277	1.59107	1.47781
Pl02G0000307500.v1	Pl02	36961246	36962476	Reverse	NF	NF	0	0	0	0	0	0	0	0	0	0	0	0	0	0	0	0	0	0	0	0	0	0	0	0	0	0	0	0
Pl02G0000320500.v1	Pl02	38462315	38464553	Reverse	NF	NF	0	0	0	0	1	0	0	0	0.063477	0	0	0	0	0	0	0	0.063477	0	0	0	0	0	0	0	0	0	0	0
Pl02G0000331200.v1	Pl02	39582350	39583738	Reverse	maker-Pl02-exonerate_protein2genome-gene-40.64	Pl02	40654172	40654819	93.04	1	0	0	0	0.081782	108.98	0	0	0	0.081782	0	0	5.8662	7.42615	7.66209	20.542	18.1386	14.1022	28.9804	4.74005	1.52182	14.7575	11.3758	24.7045	10.2107
Pl02G0000459800.v1	Pl02	50934048	50934606	Reverse	NF	NF	0	0	0	1	0	0	0	2.73462	20.0053	0.204183	0	0.800964	0.669986	0.691822	0.367667	1.21576	1.97781	1.55587	2.48373	4.14116	4.13732	0.826793	0.625657	3.04124	1.33952	0	7.37211	2.88342
Pl02G0000459900.v1	Pl02	50938779	50947208	Reverse	maker-Pl02-exonerate_protein2genome-gene-56.346	Pl02	56905663	56949144	37.19	1	0	0	0	11.0105	33.2095	2.08389	1.78944	2.24259	1.57714	1.60265	1.7148	2.58371	2.68715	2.87191	3.14902	3.26875	3.10365	5.66725	2.75409	7.12391	2.59621	1.45193	0.956252	1.53403
Pl02G0000469900.v1	Pl02	51597085	51599007	Reverse	maker-Pl02-exonerate_protein2genome-gene-56.442	Pl02	57576141	57576548	60.67	1	0	0	0	113.627	132.122	15.6973	16.5398	22.847	16.7706	19.6974	22.0751	18.2026	16.8425	15.8121	11.5718	12.8247	11.9048	11.2582	16.8035	16.9016	4.88573	1.77079	4.57635	2.05375
Pl03G0000002000.v1	Pl03	131640	132089	Forward	maker-Pl03-exonerate_protein2genome-gene-0.6	Pl03	188272	188718	88.71	0	1	0	0	335.345	473	43.0227	53.4854	49.1924	57.7396	68.7178	63.1868	59.5069	57.2388	62.4125	49.3684	55.6278	51.1407	63.5987	45.6244	28.4815	39.2163	25.3268	21.7473	16.0327
Pl03G0000003100.v1	Pl03	260015	261649	Reverse	maker-Pl03-exonerate_protein2genome-gene-0.116	Pl03	312823	314457	77.2	0	1	0	0	0	0	0	0	0	0	0	0	0	0	0	0	0	0	0	0	0	0	0.026181	0	0
Pl03G0000011900.v1	Pl03	1040908	1041239	Reverse	NF	NF	0	0	0	1	0	0	0	0.853306	0	0	0	0	0	0.853306	0	0	0	0	0	0	0	0	0	0	0	0	0	0.22356
Pl03G0000012000.v1	Pl03	1041547	1042933	Forward	NF	NF	0	0	0	1	0	0	0	2.26156	1.57924	0.318213	0.689141	0.500771	0	0.25282	0.500613	0	0.088947	0.126694	0	0	0	0.355517	1.00808	0	1.73439	3.17739	0	0
Pl03G0000023600.v1	Pl03	2043870	2044199	Reverse	NF	NF	0	0	0	0	0	0	0	0.697125	11.3711	0.089744	0.076905	0.044293	0.164109	0.120339	0.201735	0.750382	1.60317	1.42373	2.38411	1.80893	1.33457	0.550496	0.525805	0.989884	0.196037	0.128075	0.187048	0.117744
Pl03G0000023700.v1	Pl03	2044792	2046165	Reverse	NF	NF	0	0	0	0	0	0	0	1.02496	4.18307	0.219943	0.074192	0.026479	0.24902	0.205713	0.249614	0.415442	0.371572	0.369386	0.742697	0.86415	0.739122	0.347606	0.124602	0.208498	0.442165	0.267685	0	0.103017
Pl03G0000081100.v1	Pl03	9422963	9424513	Reverse	maker-Pl03-exonerate_protein2genome-gene-16.84	Pl03	16186114	16187787	60.92	0	0	0	0	0	0	0	0	0	0	0	0	0	0	0	0	0	0	0	0	0	0	0	0	0
Pl03G0000108100.v1	Pl03	13464949	13471778	Forward	NF	NF	0	0	0	1	0	0	0	0	0	0	0	0	0	0	0	0	0	0	0	0	0	0	0	0	0	0	0	0
Pl03G0000141500.v1	Pl03	18336554	18336694	Reverse	NF	NF	0	0	0	0	0	0	0	0	0	0	0	0	0	0	0	0	0	0	0	0	0	0	0	0	0	0	0.326391	0.268972
Pl03G0000169300.v1	Pl03	21253067	21253791	Reverse	NF	NF	0	0	0	0	1	0	0	0	11.3869	0	0	0	0	0	0	1.91505	0.916418	1.38476	1.16693	1.92873	1.00979	1.5595	0	1.50568	0	0	0	0
Pl03G0000176400.v1	Pl03	22047302	22047746	Forward	maker-Pl03-exonerate_protein2genome-gene-20.20	Pl03	20133064	20133634	53.37	0	1	0	0	1.77708	17.9922	0	0	0	1.49974	0.277338	0	5.14441	6.25362	6.02793	0	0.028345	0	0	0	0.537914	4.26445	1155.24	0	0
Pl03G0000237700.v1	Pl03	28990462	28991337	Reverse	NF	NF	0	0	0	0	0	0	0	0	0	0	0	0	0	0	0	0	0	0	0	0	0	0	0	0	0	0	0	0
Pl03G0000237800.v1	Pl03	28995405	28996464	Reverse	NF	NF	0	0	0	0	0	0	0	29.0404	143.203	3.84108	3.49075	5.19766	6.11474	5.81995	4.57626	7.18745	7.88484	7.08582	9.0073	11.7635	11.0008	3.19965	14.958	71.1158	2.25235	0.192004	91.8187	194.748
Pl03G0000238000.v1	Pl03	29006091	29009614	Reverse	maker-Pl03-exonerate_protein2genome-gene-27.122	Pl03	27348480	27349508	88.86	0	0	0	0	101.234	156.332	10.28	11.9032	11.0878	20.44	23.5519	23.9711	11.9419	14.4129	13.7257	23.5472	23.1379	21.7904	19.3833	19.1203	9.2723	13.4724	13.7595	18.9493	17.7616
Pl03G0000238100.v1	Pl03	29029190	29031961	Forward	maker-Pl03-exonerate_protein2genome-gene-27.60	Pl03	27363874	27366643	100	0	0	0	0	493.919	1061.66	97.3948	106.751	111.886	61.686	60.4048	55.7968	141.315	155.729	147.219	44.0102	48.9521	42.0625	90.9783	66.1623	325.228	24.7007	7.19322	96.8249	95.0852
Pl03G0000238200.v1	Pl03	29032575	29037945	Reverse	maker-Pl03-exonerate_protein2genome-gene-27.125	Pl03	27367621	27368490	83.34	0	0	0	0	704.229	1234.11	128.078	125.021	124.44	113.205	107.959	105.527	148.856	140.358	141.496	126.222	119.753	124.394	149.259	185.403	98.3683	281.635	307.676	43.3887	41.1094
Pl03G0000283100.v1	Pl03	33452595	33452927	Reverse	NF	NF	0	0	0	0	1	0	0	1.7427	2.88547	0.859456	0.157467	0.176107	0.296371	0.207774	0.045524	0.376609	0.466725	0.220278	0	0.031639	0.22833	0.152411	1.23965	0.169828	0.278097	0.055782	1.74378	0.241177
Pl03G0000368800.v1	Pl03	42829208	42829456	Forward	maker-Pl03-exonerate_protein2genome-gene-41.68	Pl03	41479130	41479378	100	0	1	0	0	1.67213	17.8052	0.662044	0.676035	0.101326	0	0.197105	0.035622	6.90406	1.99509	2.30744	0	0.038932	0.145567	5.83739	0.576698	0	0	0	0	0
Pl03G0000368900.v1	Pl03	42842002	42842250	Forward	maker-Pl03-exonerate_protein2genome-gene-41.68	Pl03	41479130	41479378	100	0	1	0	0	2.0156	18.3318	0.738987	0.875766	0.119402	0	0.184293	0.097151	7.20964	2.05343	2.40921	0	0.033741	0.145568	6.02348	0.456715	0	0	0	0	0
Pl04G0000009500.v1	Pl04	711997	715335	Reverse	maker-Pl04-exonerate_protein2genome-gene-1.28	Pl04	1057040	1120516	41.91	0	1	0	0	2.30779	10.5677	0.423634	0.217139	0.319431	0.48552	0.33056	0.531502	1.35063	1.20916	1.0232	1.3378	0.900682	0.70358	2.44591	0.855677	0.74104	1.23683	1.10079	1.79721	1.07253
Pl04G0000066500.v1	Pl04	6751849	6753283	Forward	maker-Pl04-exonerate_protein2genome-gene-7.93	Pl04	7350193	7351466	33.26	0	1	0	1	9.32411	0	2.94274	3.88955	2.49181	0	0	0	0	0	0	0	0	0	0	0	0	0	0	0	0
Pl04G0000082400.v1	Pl04	8881727	8884675	Reverse	NF	NF	0	0	0	0	0	0	1	0	0.130266	0	0	0	0	0	0	0.092497	0	0.037769	0	0	0	0	0	0	0	0	0	0
Pl04G0000094200.v1	Pl04	10509399	10509769	Forward	NF	NF	0	0	0	1	0	0	0	21.6641	77.9186	4.93934	5.23608	4.33802	3.77676	1.74713	1.62679	10.4364	10.698	11.7388	9.0662	7.81256	8.86938	2.03676	6.15113	11.1093	1.44385	0.670922	6.37016	2.8256
Pl04G0000095600.v1	Pl04	10700150	10702728	Forward	NF	NF	0	0	0	1	0	0	0	0.538326	12.8685	0	0.068168	0.256849	0	0.213309	0	1.80222	1.85869	1.0733	1.35915	1.27693	1.76429	1.97711	0	1.75677	0.458957	0.522232	0	0.987169
Pl04G0000096800.v1	Pl04	10841762	10843235	Reverse	NF	NF	0	0	0	0	1	0	0	19.1304	0	1.76233	4.42177	2.12217	3.77455	3.67832	3.37128	0	0	0	0	0	0	0	0	0	0	0	0	0
Pl04G0000137500.v1	Pl04	17075714	17078271	Reverse	NF	NF	0	0	0	0	1	0	0	0	0	0	0	0	0	0	0	0	0	0	0	0	0	0	0	0	0	0	0	0
Pl04G0000161400.v1	Pl04	20976901	20977755	Reverse	NF	NF	0	0	0	1	0	0	0	0	0	0	0	0	0	0	0	0	0	0	0	0	0	0	0	0	0	0	0	0
Pl04G0000187800.v1	Pl04	25209668	25211609	Forward	NF	NF	0	0	0	0	1	0	0	0	0	0	0	0	0	0	0	0	0	0	0	0	0	0	0	0	0	0	0	0
Pl04G0000214400.v1	Pl04	29489445	29494685	Forward	NF	NF	0	0	0	0	1	0	0	0	0	0	0	0	0	0	0	0	0	0	0	0	0	0	0	0	0	0	0	0
Pl04G0000268100.v1	Pl04	37507538	37508863	Reverse	maker-Pl04-exonerate_protein2genome-gene-39.44	Pl04	39421165	39422084	75.61	0	0	0	0	0	0.111448	0	0	0	0	0	0	0	0	0	0	0.111448	0	0	0	0	0	0	0	0
Pl04G0000268300.v1	Pl04	37518067	37519122	Reverse	NF	NF	0	0	0	0	0	0	1	13.8512	12.0604	2.97036	2.09084	3.30748	2.19897	1.12808	2.15548	1.87147	1.37344	1.54011	1.675	0.663106	1.83128	1.26785	0.220934	1.61726	0.827507	4.91329	0	0.209146
Pl04G0000268400.v1	Pl04	37519924	37521480	Reverse	NF	NF	0	0	0	0	0	0	1	1.20941	1.47365	0.135402	0.347108	0.022555	0.283664	0.156145	0.264539	0.075771	0.413561	0.130535	0.145464	0.192388	0	0.216829	0	0.299106	0.101152	1.36398	0	0.141848
Pl04G0000277500.v1	Pl04	38860163	38864178	Forward	NF	NF	0	0	0	1	0	0	1	0.052888	77.0489	0	0	0.052888	0	0	0	14.0569	13.3308	13.5145	6.43916	7.33279	5.15055	7.0477	5.45727	4.71924	0.486202	0.375988	1.04964	0.910016
Pl04G0000281700.v1	Pl04	39601751	39603664	Reverse	NF	NF	0	0	0	0	1	0	0	0	11.7093	0	0	0	0	0	0	1.01273	1.15962	1.46521	1.5661	0.32788	0.928745	2.32901	1.36379	1.55627	0.32317	0	0	0.708553
Pl04G0000313900.v1	Pl04	43784998	43786173	Forward	maker-Pl04-exonerate_protein2genome-gene-42.0	Pl04	41930443	41933230	41.54	0	0	0	0	0	0.024162	0	0	0	0	0	0	0.024162	0	0	0	0	0	0	0	0	0	0	0	0
Pl04G0000314000.v1	Pl04	43786566	43787669	Forward	maker-Pl04-exonerate_protein2genome-gene-42.13	Pl04	42351724	42353289	55.05	0	0	0	0	0	0	0	0	0	0	0	0	0	0	0	0	0	0	0	0	0	0	0	0	0
Pl04G0000319700.v1	Pl04	44372086	44374008	Reverse	NF	NF	0	0	0	0	0	0	1	0	0	0	0	0	0	0	0	0	0	0	0	0	0	0	0	0	0	0	0	0
Pl04G0000349100.v1	Pl04	47318426	47321949	Forward	NF	NF	0	0	0	1	0	0	1	0.528626	1.44204	0.114412	0.050227	0	0.116798	0.154505	0.092684	0.166943	0.046988	0.177928	0.187773	0.162498	0.136237	0.331168	0	0.232505	0.683723	1.71145	0	0.213776
Pl04G0000350400.v1	Pl04	47404330	47406260	Reverse	maker-Pl04-exonerate_protein2genome-gene-50.208	Pl04	49807700	49839952	28.27	0	1	0	0	2.93682	5.43262	0	0	0.391462	1.06234	0.796786	0.686232	0.201812	0.519154	0.373131	0	0	0.17788	0.033489	4.12715	0	0.381998	194.193	0	0
Pl04G0000350700.v1	Pl04	47423948	47424859	Reverse	maker-Pl04-exonerate_protein2genome-gene-50.220	Pl04	49859316	49860332	78.89	0	1	0	0	0	0.51556	0	0	0	0	0	0	0	0.075405	0.015338	0.147676	0	0.277141	0	0	0	0.0539	0.230478	0	0
Pl04G0000376800.v1	Pl04	49457080	49457377	Forward	maker-Pl04-exonerate_protein2genome-gene-50.200	Pl04	51900237	51900446	100	1	0	0	0	244.391	351.22	46.1278	42.7951	42.1543	29.9123	41.4285	41.9727	54.7971	41.8603	44.3592	31.7531	39.7503	44.0666	32.703	37.7871	24.1436	7.38779	4.79151	13.3813	10.2271
Pl05G0000024700.v1	Pl05	2039252	2039856	Reverse	NF	NF	0	0	0	1	0	0	0	17.4927	1.90146	3.02814	3.90559	3.41956	2.0674	2.02992	3.04207	0.110915	0.349343	0.188965	0.300527	0.035786	0.291523	0.10332	0.406207	0.114874	0.207633	0.330464	2.99016	0.847412
Pl05G0000024800.v1	Pl05	2043255	2045121	Reverse	NF	NF	0	0	0	1	0	0	0	11.169	6.28109	2.30462	2.27782	2.19562	1.33815	1.4769	1.57594	0.724743	0.581007	0.5655	0.306095	0.804751	0.493646	1.0377	0.889111	0.87854	6.84771	3.32254	0.430808	0.73959
Pl05G0000024900.v1	Pl05	2055711	2059796	Reverse	maker-Pl05-exonerate_protein2genome-gene-1.166	Pl05	1523307	1525459	21.19	1	0	0	0	7.2558	8.96478	1.12861	1.3029	1.52212	0.824083	1.33964	1.13844	0.842672	0.80889	0.683461	0.924422	1.00309	0.538594	0.25408	1.59198	2.3176	2.57881	2.05702	3.67855	3.18987
Pl05G0000025000.v1	Pl05	2060656	2060970	Forward	NF	NF	0	0	0	1	0	0	0	2.62146	27.07	0.457088	0.844535	1.23175	0	0.011286	0.076796	3.31866	3.19834	2.61002	2.5404	3.0139	2.33883	3.67313	5.22921	1.14749	1.03186	0.429908	0	0.087642
Pl05G0000025100.v1	Pl05	2066298	2066611	Reverse	NF	NF	0	0	0	1	0	0	0	3.48512	3.24845	0.521776	1.18479	0.240866	0.665541	0.409697	0.46245	0.80859	0.168935	0.322976	0.217638	0.15146	0.290115	0.256729	0.540663	0.491343	0.954146	0.720965	0	0
Pl05G0000025200.v1	Pl05	2067471	2071048	Forward	maker-Pl05-exonerate_protein2genome-gene-1.166	Pl05	1523307	1525459	20.76	1	0	0	0	0.433579	25.7054	0.121661	0.311918	0	0	0	0	1.6832	2.32879	2.4125	2.62761	2.70004	3.36598	2.2235	6.81714	1.5466	0.746235	1.19191	0	0
Pl05G0000025300.v1	Pl05	2081123	2082457	Reverse	NF	NF	0	0	0	1	0	0	0	2.0909	6.39248	0.516374	0.438124	0.404135	0.235159	0.231651	0.265452	0.488211	0.713496	0.601689	0.794158	0.740037	0.444595	0.93382	1.11538	0.561096	0.472268	0.325331	0.301134	0.127691
Pl05G0000025400.v1	Pl05	2085382	2088229	Reverse	maker-Pl05-exonerate_protein2genome-gene-1.166	Pl05	1523307	1525459	27.83	1	0	0	0	1.30505	4.57114	0	0.633769	0	0.671285	0	0	0.654709	1.08359	0.403765	0.274949	0.402	0.420133	0.20612	0.880415	0.245468	1.66277	0	3.62135	1.2716
Pl05G0000025500.v1	Pl05	2089817	2090149	Forward	NF	NF	0	0	0	1	0	0	0	3.44384	3.40186	0.351082	0.747452	0.46757	0.045925	0.738023	1.09379	0.78403	0.273978	0.383673	0.121335	0.138273	0.285153	0.229202	0.58063	0.605589	4.72441	2.15114	0	1.49582
Pl05G0000025700.v1	Pl05	2097401	2097833	Forward	NF	NF	0	0	0	1	0	0	0	7.11911	1.19189	1.396	0.669081	2.06382	0.665253	1.33163	0.993327	0.067914	0.051882	0.121146	0.294711	0	0.059335	0.339889	0.153947	0.103069	0.219675	0	1.38327	2.36644
Pl05G0000025800.v1	Pl05	2098423	2099412	Reverse	NF	NF	0	0	0	1	0	0	0	20.155	17.0151	3.46444	3.51168	3.60768	2.73227	3.59122	3.24767	2.07839	1.53531	1.45399	1.60563	1.42085	1.89094	1.65688	2.36178	3.01131	2.01462	1.32551	0.92617	0.769094
Pl05G0000025900.v1	Pl05	2100899	2104901	Forward	maker-Pl05-exonerate_protein2genome-gene-1.166	Pl05	1523307	1525459	42.49	1	0	0	0	6.74724	9.98725	0.709359	1.10681	1.87904	0.851847	0.64542	1.55476	1.6825	0.660402	0.940714	0.81921	0.36044	0.182443	1.17561	0.972648	3.19328	3.7227	7.44846	3.48378	5.72999
Pl05G0000026000.v1	Pl05	2105564	2105806	Forward	NF	NF	0	0	0	1	0	0	0	0.313157	0.356698	0.047256	0	0.098216	0	0.167685	0	0	0.005188	0	0	0.191489	0.160021	0	0	0	6.11589	2.96717	3.73485	4.63162
Pl05G0000026100.v1	Pl05	2106498	2106812	Forward	NF	NF	0	0	0	1	0	0	0	6.34712	6.51992	1.21397	1.8488	0.889284	0.580068	0.808012	1.00699	1.28658	0.314022	0.657019	0.352664	0.942177	0.805358	0.526495	0.834418	0.801189	6.00111	2.79564	0.232041	0.785255
Pl05G0000041900.v1	Pl05	3370315	3372109	Reverse	NF	NF	0	0	0	0	1	0	0	5.59767	3.30103	2.11078	1.61922	1.04532	0.098145	0.724202	0	0	0.174933	0.30609	0	0.619836	0	0.49731	1.05075	0.65211	0	0	0	0
Pl05G0000058100.v1	Pl05	5216748	5217134	Reverse	NF	NF	0	0	0	0	0	0	0	0.168919	0.061788	0	0	0	0	0.018232	0.150687	0	0	0	0	0.061788	0	0	0	0	0.072759	0	0	0
Pl05G0000069000.v1	Pl05	6447585	6448226	Reverse	NF	NF	0	0	0	1	0	0	0	0	0	0	0	0	0	0	0	0	0	0	0	0	0	0	0	0	0	0	0	0
Pl05G0000097400.v1	Pl05	10350769	10352820	Reverse	NF	NF	0	0	0	0	0	0	0	0	0	0	0	0	0	0	0	0	0	0	0	0	0	0	0	0	0	0	0	0
Pl05G0000103600.v1	Pl05	11352247	11355923	Reverse	NF	NF	0	0	0	0	0	0	0	99.9099	0	16.7887	17.4685	18.3435	16.7318	13.7333	16.844	0	0	0	0	0	0	0	0	0	0	0	0	0
Pl05G0000115100.v1	Pl05	14147464	14149014	Forward	NF	NF	0	0	0	1	0	0	0	0	0	0	0	0	0	0	0	0	0	0	0	0	0	0	0	0	0	0	0	0
Pl05G0000122800.v1	Pl05	15784798	15786039	Reverse	NF	NF	0	0	0	1	0	0	0	0	0	0	0	0	0	0	0	0	0	0	0	0	0	0	0	0	0	0	0	0
Pl05G0000151100.v1	Pl05	21932260	21932948	Forward	NF	NF	0	0	0	0	1	0	0	0	0	0	0	0	0	0	0	0	0	0	0	0	0	0	0	0	0	0	0	0
Pl05G0000170600.v1	Pl05	25075386	25077531	Forward	NF	NF	0	0	0	0	0	0	0	0	0	0	0	0	0	0	0	0	0	0	0	0	0	0	0	0	0	0	0	0
Pl05G0000184100.v1	Pl05	27101780	27101924	Forward	NF	NF	0	0	0	1	0	0	0	2.28134	5.0661	0.172605	0.1109	0.397384	0.852196	0.503568	0.244687	0	0.790456	0.969679	0.602192	0.133712	0	1.75231	0.279708	0.538038	2.77135	0.654019	0	1.00005
Pl05G0000191000.v1	Pl05	27961315	27963053	Reverse	NF	NF	0	0	0	0	1	0	0	0.141267	0.132123	0	0	0.062025	0	0.079242	0	0.068439	0	0	0	0	0	0.063684	0	0	0	0	0	0
Pl05G0000191600.v1	Pl05	28069389	28072452	Reverse	NF	NF	0	0	0	0	1	1	0	0	0.026955	0	0	0	0	0	0	0	0	0	0	0.009631	0	0	0	0.017324	0	0	0	0
Pl05G0000236700.v1	Pl05	32797473	32799156	Forward	NF	NF	0	0	0	0	0	0	0	0	0	0	0	0	0	0	0	0	0	0	0	0	0	0	0	0	0	0	0	0
Pl05G0000245100.v1	Pl05	33821386	33822052	Forward	NF	NF	0	0	0	1	0	0	0	0	0	0	0	0	0	0	0	0	0	0	0	0	0	0	0	0	0	0	0	0
Pl05G0000245200.v1	Pl05	33824484	33824606	Forward	NF	NF	0	0	0	1	0	0	0	0	0.548473	0	0	0	0	0	0	0	0	0	0	0	0	0	0.548473	0	0	0	0	0
Pl05G0000257000.v1	Pl05	34894354	34894494	Reverse	NF	NF	0	0	0	0	0	0	0	9.69467	25.2897	2.60189	2.63674	2.40116	0.831542	0.784887	0.438444	3.50975	3.94634	5.31515	2.38543	1.34089	1.67386	0.536977	3.60143	2.97983	6.2855	2.89669	8.7814	20.1736
Pl05G0000263200.v1	Pl05	35373878	35374282	Forward	NF	NF	0	0	0	0	0	0	1	0	0	0	0	0	0	0	0	0	0	0	0	0	0	0	0	0	0	0	0	0
Pl05G0000263300.v1	Pl05	35375202	35376836	Reverse	NF	NF	0	0	0	1	0	0	1	0	0	0	0	0	0	0	0	0	0	0	0	0	0	0	0	0	0	0	0	0
Pl06G0000009100.v1	Pl06	1243684	1244650	Forward	maker-Pl06-exonerate_protein2genome-gene-20.42	Pl06	20578925	20579263	72.98	0	0	0	0	11.087	35.2569	2.82914	0.927653	2.01946	1.92994	1.52651	1.85428	4.60697	3.31726	4.64154	2.98401	3.28009	3.02273	4.03928	5.33206	4.03294	0.459756	0.016682	1.01518	0.952065
Pl06G0000009200.v1	Pl06	1246074	1246339	Reverse	maker-Pl06-exonerate_protein2genome-gene-20.127	Pl06	20580606	20580770	65.96	0	0	0	0	27.452	135.821	3.85876	3.39984	4.96173	6.85853	3.73147	4.6417	15.409	17.9904	19.6727	12.7685	12.4007	12.3121	14.7538	21.8179	8.69565	0.172241	0	0	0.256846
Pl06G0000018700.v1	Pl06	2408923	2412379	Reverse	NF	NF	0	0	0	1	0	0	0	0.028297	108.288	0	0.028297	0	0	0	0	9.28914	14.0225	13.6059	7.66925	7.64103	6.37799	24.9475	9.16419	15.5707	1.21949	1.09175	0.46541	0.125314
Pl06G0000028600.v1	Pl06	3799499	3801510	Reverse	NF	NF	0	0	0	1	0	0	0	0	0	0	0	0	0	0	0	0	0	0	0	0	0	0	0	0	0	0	0	0
Pl06G0000072100.v1	Pl06	10699019	10700991	Reverse	NF	NF	0	0	0	0	1	0	0	0	0	0	0	0	0	0	0	0	0	0	0	0	0	0	0	0	0	0	0	0
Pl06G0000083100.v1	Pl06	12312323	12314232	Forward	NF	NF	0	0	0	0	0	1	0	0	0	0	0	0	0	0	0	0	0	0	0	0	0	0	0	0	0	0	0	0
Pl06G0000103800.v1	Pl06	15073449	15073586	Forward	NF	NF	0	0	0	0	1	0	0	0	0.161015	0	0	0	0	0	0	0	0	0	0	0	0.161015	0	0	0	0	0	0	0
Pl06G0000103900.v1	Pl06	15075455	15076036	Reverse	NF	NF	0	0	0	0	1	0	0	0.057877	0.146427	0	0.057877	0	0	0	0	0	0	0.039034	0	0	0	0	0	0.107393	0.244472	0	0	0.097694
Pl06G0000118700.v1	Pl06	16973058	16974062	Forward	NF	NF	0	0	0	0	1	0	0	12.0598	1.00315	0.668177	0.984636	1.83717	2.11883	2.33933	4.11165	0	0	0.0772	0	0	0	0.208061	0.42085	0.297038	0.568529	0	0.789422	0.816588
Pl06G0000135900.v1	Pl06	19103238	19104304	Forward	NF	NF	0	0	0	0	1	0	0	0	0	0	0	0	0	0	0	0	0	0	0	0	0	0	0	0	0	0	0	0
Pl06G0000173000.v1	Pl06	22571178	22573355	Forward	maker-Pl06-exonerate_protein2genome-gene-23.74	Pl06	23767449	23769626	100	0	1	0	0	1.95962	7.91267	0.366545	0.279813	0.652109	0.272318	0.287929	0.100903	0.685657	1.39048	0.719988	0.214539	0.603051	0.324716	1.18474	2.08058	0.708922	0	0	0	0.237047
Pl06G0000173100.v1	Pl06	22573890	22575672	Reverse	maker-Pl06-exonerate_protein2genome-gene-23.153	Pl06	23770362	23771750	100	0	1	0	0	590.894	671.9	120.754	130.491	122.638	70.1289	77.0723	69.8101	104.42	98.3841	100.584	63.3077	58.72	61.0593	70.066	63.08	52.2787	10.8667	34.4842	13.8888	10.6992
Pl06G0000173200.v1	Pl06	22576196	22584385	Forward	maker-Pl06-exonerate_protein2genome-gene-23.77	Pl06	23773895	23776917	87.4	0	1	0	0	80.0894	83.0853	16.644	14.968	15.1459	10.5624	10.9575	11.8116	10.9747	11.1662	11.9281	8.44447	7.27415	7.24164	11.2239	5.0548	9.77727	2.59994	0.349246	1.05298	1.18835
Pl06G0000173300.v1	Pl06	22580307	22584385	Reverse	maker-Pl06-exonerate_protein2genome-gene-23.155	Pl06	23778371	23780388	97.87	0	1	0	0	20.0986	40.8053	4.04151	3.21003	2.86615	3.19965	3.38521	3.39606	3.48038	3.46241	3.46003	3.43627	4.9603	4.85266	8.119	4.16163	4.87258	0	0.120753	0.969193	0.156677
Pl06G0000184500.v1	Pl06	23767476	23768563	Forward	maker-Pl06-exonerate_protein2genome-gene-25.18	Pl06	24982636	24983691	94.3	0	1	0	0	0	0.723582	0	0	0	0	0	0	0	0	0	0	0	0	0	0.723582	0	0	0	0	0
Pl06G0000184600.v1	Pl06	23774452	23775359	Reverse	maker-Pl06-exonerate_protein2genome-gene-25.125	Pl06	24989714	24990621	100	0	1	0	0	0	0	0	0	0	0	0	0	0	0	0	0	0	0	0	0	0	0	0	0	0
Pl06G0000184900.v1	Pl06	23790727	23791634	Reverse	maker-Pl06-exonerate_protein2genome-gene-25.125	Pl06	24989714	24990621	100	1	0	0	0	0	0	0	0	0	0	0	0	0	0	0	0	0	0	0	0	0	0	0	0	0
Pl06G0000195400.v1	Pl06	24669574	24670677	Reverse	maker-Pl06-exonerate_protein2genome-gene-19.111	Pl06	19627998	19629072	35.95	1	0	0	0	0	0.073946	0	0	0	0	0	0	0	0	0	0	0	0	0	0	0.073946	0	0	0	0.0401
Pl06G0000274200.v1	Pl06	31269237	31271913	Reverse	maker-Pl06-exonerate_protein2genome-gene-32.162	Pl06	32478469	32505845	82.88	1	0	0	0	0.043945	229.655	0	0.043945	0	0	0	0	12.0007	11.3183	11.6289	53.5361	51.1671	56.5645	11.5475	12.0442	9.84753	44.1928	1.47997	28.2702	35.558
Pl06G0000274300.v1	Pl06	31272520	31274180	Reverse	NF	NF	0	0	0	1	0	0	0	2.75603	31.0963	0.402901	0.491076	0.165223	0.380115	0.505477	0.811241	1.11562	0.843691	0.756284	6.13749	5.9785	3.99962	3.99501	2.49794	5.77212	46.6042	2.32057	16.9338	24.96
Pl06G0000312600.v1	Pl06	34469869	34472373	Forward	NF	NF	0	0	0	0	1	0	0	0	0	0	0	0	0	0	0	0	0	0	0	0	0	0	0	0	0	0	0	0
Pl06G0000343200.v1	Pl06	36537455	36537693	Forward	NF	NF	0	0	0	0	1	0	0	0.221268	0.21181	0	0.221268	0	0	0	0	0	0	0.026514	0.139004	0	0.046292	0	0	0	0	0	0	0
Pl06G0000343300.v1	Pl06	36588664	36589793	Reverse	NF	NF	0	0	0	0	1	0	0	0.753131	2.05956	0	0.07111	0.130083	0.059319	0.092499	0.40012	0.121686	0.047103	0.053216	0.03887	0	0	0.675896	0.323218	0.799572	0.064878	1.24006	1.20678	0.376649
Pl07G0000064500.v1	Pl07	5122707	5123460	Reverse	maker-Pl07-exonerate_protein2genome-gene-5.40	Pl07	5249069	5249822	83.23	0	1	0	0	0	2.19097	0	0	0	0	0	0	0	0	0	0	0	0	0	2.19097	0	0	0	0	0
Pl07G0000074000.v1	Pl07	6264213	6266719	Forward	NF	NF	0	0	0	1	0	0	0	0	0.015023	0	0	0	0	0	0	0	0	0	0	0	0.015023	0	0	0	0.019059	0	0	0
Pl07G0000075800.v1	Pl07	6416871	6417149	Forward	maker-Pl07-exonerate_protein2genome-gene-6.62	Pl07	6572408	6572686	100	0	1	0	0	0	2.70215	0	0	0	0	0	0	0	0	0	0.889824	0.735457	0.543803	0.533064	0	0	0	0	0	0
Pl07G0000122900.v1	Pl07	11905015	11905257	Forward	NF	NF	0	0	0	0	1	1	0	0	0	0	0	0	0	0	0	0	0	0	0	0	0	0	0	0	0	0	0	0
Pl07G0000149900.v1	Pl07	15378810	15380990	Reverse	NF	NF	0	0	0	0	0	0	0	3.48969	30.9891	0.668615	0.438909	0.522051	0.893017	0.485964	0.481133	0.441136	0.233519	0.262695	0	0	0.080786	0.337459	29.4719	0.16161	0	0	0	0
Pl07G0000376200.v1	Pl07	45277673	45278053	Reverse	NF	NF	0	0	0	0	0	0	0	0	0	0	0	0	0	0	0	0	0	0	0	0	0	0	0	0	0.191652	0	0	0.14492
Pl07G0000387200.v1	Pl07	46291527	46293567	Reverse	NF	NF	0	0	0	1	0	0	0	6.91265	2.72997	1.79457	0.994746	1.13938	0.930371	0.841327	1.21225	0.513955	0.849982	0.95739	0	0	0	0.408647	0	0	0	0	0	0
Pl07G0000394800.v1	Pl07	47015959	47017935	Forward	NF	NF	0	0	0	0	1	0	0	7.88022	24.6203	1.55032	1.21194	1.03458	1.36991	1.1466	1.56687	3.17103	2.92332	3.34267	4.68804	4.97848	3.75918	1.62154	0.03778	0.098223	0.113218	2.17599	0.393336	0
Pl07G0000397200.v1	Pl07	47208885	47210480	Reverse	NF	NF	0	0	0	1	0	0	0	0	0	0	0	0	0	0	0	0	0	0	0	0	0	0	0	0	0	0	0	0.056186
Pl08G0000002000.v1	Pl08	126246	126990	Forward	maker-Pl08-exonerate_protein2genome-gene-0.14	Pl08	151687	152653	33.57	1	0	0	1	0	0	0	0	0	0	0	0	0	0	0	0	0	0	0	0	0	0	0	0	0
Pl08G0000033000.v1	Pl08	2577748	2578480	Forward	NF	NF	0	0	0	1	0	0	0	1.09471	4718.59	0.091988	0	0.0814	0.451213	0.111926	0.358185	349.117	325.291	358.826	792.947	885.236	882.851	624.106	313.045	187.174	0	0	220.159	22.1248
Pl08G0000035000.v1	Pl08	2730205	2731878	Forward	NF	NF	0	0	0	1	0	0	0	0	0.020097	0	0	0	0	0	0	0	0	0	0	0	0.020097	0	0	0	0.025496	0	0	0
Pl08G0000063500.v1	Pl08	5263675	5265004	Reverse	maker-Pl08-exonerate_protein2genome-gene-5.152	Pl08	5646469	5668031	83.37	0	1	0	0	0	0.468906	0	0	0	0	0	0	0.086998	0	0	0	0	0.204568	0.063987	0.113353	0	0	0	0	0
Pl08G0000070200.v1	Pl08	5922730	5927160	Reverse	maker-Pl08-exonerate_protein2genome-gene-6.149	Pl08	6555738	6560071	71.55	1	0	0	0	0	1.57371	0	0	0	0	0	0	0	0	0.135683	0.322747	0.212372	0	0.902909	0	0	0	0	0	0
Pl08G0000070300.v1	Pl08	5930951	5931307	Reverse	maker-Pl08-exonerate_protein2genome-gene-6.39	Pl08	6393948	6394340	66.43	1	0	0	0	12.8157	4.70264	0.773223	0.37112	0.810194	1.39213	4.2617	5.20732	0	0	0.056626	1.72134	0.910424	0.516569	1.49768	0	0	0	0	0	0
Pl08G0000070600.v1	Pl08	5950925	5951092	Forward	NF	NF	0	0	0	1	0	0	0	0	43.8944	0	0	0	0	0	0	0.799886	6.86333	5.08461	6.03401	1.96768	2.88703	20.2579	0	0	0	0	0	0
Pl08G0000110200.v1	Pl08	10025681	10026541	Forward	NF	NF	0	0	0	1	0	0	0	0.502906	0.064127	0	0	0.055841	0.400755	0	0.04631	0	0	0	0	0	0.064127	0	0	0	0	0	0	0
Pl08G0000110300.v1	Pl08	10029219	10031722	Forward	NF	NF	0	0	0	1	0	0	0	0	0.009805	0	0	0	0	0	0	0	0	0.009805	0	0	0	0	0	0	0	0	0	0
Pl08G0000115500.v1	Pl08	10612951	10614045	Forward	NF	NF	0	0	0	1	0	1	0	0.728016	0.319995	0	0	0	0.237354	0.194856	0.295806	0	0	0.319995	0	0	0	0	0	0	0	0	0	0
Pl08G0000128800.v1	Pl08	12031919	12033291	Forward	NF	NF	0	0	0	0	0	0	0	0	0	0	0	0	0	0	0	0	0	0	0	0	0	0	0	0	0	0	0	0
Pl08G0000157600.v1	Pl08	15932124	15933788	Reverse	maker-Pl08-exonerate_protein2genome-gene-6.96	Pl08	5995103	5996269	40.51	1	0	0	0	0.091728	46.8376	0	0.091728	0	0	0	0	7.06387	6.81668	7.48236	4.20175	3.46364	3.74692	5.20465	1.38164	7.47612	2.19452	0.394623	1.91947	2.32052
Pl08G0000161600.v1	Pl08	16526942	16528351	Forward	NF	NF	0	0	0	1	0	0	0	0	0	0	0	0	0	0	0	0	0	0	0	0	0	0	0	0	0	0	0	0
Pl08G0000164200.v1	Pl08	16839621	16841272	Reverse	NF	NF	0	0	0	0	1	1	0	0	0	0	0	0	0	0	0	0	0	0	0	0	0	0	0	0	0	0	0	0
Pl08G0000165700.v1	Pl08	17054837	17055118	Reverse	NF	NF	0	0	0	0	0	1	0	0	0	0	0	0	0	0	0	0	0	0	0	0	0	0	0	0	0	0	0	0
Pl08G0000165800.v1	Pl08	17055217	17055603	Reverse	NF	NF	0	0	0	0	0	1	0	0	0	0	0	0	0	0	0	0	0	0	0	0	0	0	0	0	0	0	0	0
Pl08G0000170700.v1	Pl08	17873094	17878206	Forward	NF	NF	0	0	0	0	1	0	0	0	0	0	0	0	0	0	0	0	0	0	0	0	0	0	0	0	0	0	0	0
Pl08G0000176200.v1	Pl08	18876511	18876669	Reverse	NF	NF	0	0	0	0	1	0	0	3.51711	0	0.570368	0.483692	0.077196	0.364214	0.739582	1.28205	0	0	0	0	0	0	0	0	0	0	0	0	0
Pl08G0000176300.v1	Pl08	18876891	18877445	Reverse	NF	NF	0	0	0	0	1	0	0	7.55842	0	0.850968	0.789856	1.3294	1.19332	1.79901	1.59586	0	0	0	0	0	0	0	0	0	0	0	0	0
Pl08G0000204200.v1	Pl08	25037102	25038847	Forward	NF	NF	0	0	0	1	0	0	0	0	0	0	0	0	0	0	0	0	0	0	0	0	0	0	0	0	0	0	0	0
Pl08G0000224900.v1	Pl08	30741121	30743078	Reverse	NF	NF	0	0	0	1	0	0	0	0	0	0	0	0	0	0	0	0	0	0	0	0	0	0	0	0	0	0	0	0
Pl08G0000243200.v1	Pl08	35103998	35107202	Forward	maker-Pl08-exonerate_protein2genome-gene-26.14	Pl08	26888218	26888520	20.03	0	1	0	0	1.24131	2.67664	0.123473	0.222608	0.246224	0.27316	0.192718	0.18313	0.224463	0.319149	0.244008	0.286125	0.492861	0.294672	0.298427	0.329457	0.187481	0.216752	0.32996	0	0.510544
Pl08G0000251400.v1	Pl08	36790939	36792524	Forward	NF	NF	0	0	0	0	1	0	0	0	0	0	0	0	0	0	0	0	0	0	0	0	0	0	0	0	0	0	0	0
Pl08G0000279900.v1	Pl08	41587326	41588221	Forward	NF	NF	0	0	0	0	1	0	0	0.593306	59.8869	0	0.112364	0	0	0.318951	0.161991	9.44281	8.45627	8.85509	0.304634	1.76752	1.62938	7.01307	7.77934	14.6388	0	0	0	0
Pl08G0000280000.v1	Pl08	41587981	41589152	Forward	NF	NF	0	0	0	0	1	0	0	0	0.377314	0	0	0	0	0	0	0	0	0.076211	0	0	0	0	0	0.301103	0	0	0	0
Pl08G0000339400.v1	Pl08	49023427	49023492	Forward	NF	NF	0	0	0	0	1	0	0	2.8198	0.214147	1.69528	0.07945	0.216969	0.407817	0	0.420282	0	0	0	0	0	0	0.214147	0	0	0	0	0	0
Pl08G0000339500.v1	Pl08	49023803	49026759	Forward	maker-Pl08-exonerate_protein2genome-gene-51.62	Pl08	51776419	51778041	34.98	0	1	0	0	10.208	6.15313	1.201	1.9238	1.28221	2.08626	2.07355	1.64113	0.507997	0.296047	0.510038	0.814978	0.476952	0.927546	0.733991	0.68951	1.19607	0	0	0	0.702928
Pl08G0000359600.v1	Pl08	50671134	50671832	Forward	NF	NF	0	0	0	0	0	0	0	0	0	0	0	0	0	0	0	0	0	0	0	0	0	0	0	0	0.034115	0	0	0
Pl08G0000367300.v1	Pl08	51427951	51429054	Forward	NF	NF	0	0	0	1	0	0	0	0	0	0	0	0	0	0	0	0	0	0	0	0	0	0	0	0	0	0	0	0
Pl08G0000378900.v1	Pl08	52596370	52598453	Forward	NF	NF	0	0	0	1	0	0	0	0.06865	0	0	0	0.06865	0	0	0	0	0	0	0	0	0	0	0	0	0	0	0	0
Pl08G0000379500.v1	Pl08	52713685	52716285	Forward	maker-Pl08-exonerate_protein2genome-gene-17.0	Pl08	16985945	16991020	84.85	0	0	0	0	0	0.060453	0	0	0	0	0	0	0	0	0	0	0.060453	0	0	0	0	0	0	0	0
Pl08G0000379600.v1	Pl08	52721541	52722380	Reverse	NF	NF	0	0	0	0	0	0	0	4.53482	0.181512	1.40824	1.22404	0.315442	0.535299	0.552213	0.499582	0.120484	0	0.061028	0	0	0	0	0	0	0	0	0	0
Pl08G0000379700.v1	Pl08	52722450	52723133	Reverse	NF	NF	0	0	0	0	0	0	0	6.60234	0.09621	1.4365	1.42464	0.989522	1.78158	0.550891	0.419202	0.09621	0	0	0	0	0	0	0	0	0	0	0	0
Pl08G0000396100.v1	Pl08	54282110	54284368	Reverse	NF	NF	0	0	0	0	1	0	0	0.46362	3.96442	0	0	0.045279	0.099472	0.106411	0.212458	0.318912	0.647446	0.429077	0.526838	0.669878	0.414504	0.433981	0.370177	0.153609	0.916792	8.64503	0	0
Pl08G0000401100.v1	Pl08	54639880	54641081	Reverse	NF	NF	0	0	0	0	1	0	0	0	0	0	0	0	0	0	0	0	0	0	0	0	0	0	0	0	0	0	0	0
Pl09G0000054900.v1	Pl09	4280736	4281470	Reverse	maker-Pl09-exonerate_protein2genome-gene-4.158	Pl09	4336515	4337129	62.93	1	0	0	0	0	2.64868	0	0	0	0	0	0	0.179222	0.317607	0.222186	0	0	0	0.203331	0	1.72634	0	0	2.67979	5.06082
Pl09G0000074000.v1	Pl09	5996399	5997496	Reverse	NF	NF	0	0	0	0	1	0	0	0	0	0	0	0	0	0	0	0	0	0	0	0	0	0	0	0	0	0	0	0
Pl09G0000077300.v1	Pl09	6298546	6302965	Reverse	NF	NF	0	0	0	1	0	0	0	0.012483	15.9431	0	0.011864	0	0	0.000619	0	1.34553	1.1626	0.89331	3.55438	3.81231	4.0888	0.825338	0.253928	0.006885	0.073868	0.250328	0.008268	0.010827
Pl09G0000105800.v1	Pl09	9376675	9379198	Forward	NF	NF	0	0	0	0	0	0	0	0	0.023314	0	0	0	0	0	0	0.011259	0	0.012055	0	0	0	0	0	0	0	0.030223	0	0
Pl09G0000113300.v1	Pl09	10217625	10218061	Reverse	maker-Pl09-exonerate_protein2genome-gene-10.131	Pl09	10380539	10380975	84.35	1	0	0	0	12.0623	22.5355	1.26385	0.635162	1.89852	3.66812	1.82241	2.77422	1.60597	1.40358	2.10376	5.60616	2.57627	2.26526	2.3091	4.12642	0.538943	7.90594	6.55779	5.39209	2.39547
Pl09G0000113400.v1	Pl09	10219134	10219235	Reverse	NF	NF	0	0	0	1	0	0	0	2.92133	2.12668	0.294443	0.58263	0.340951	0.407817	0.463832	0.831653	0.307978	0	0.123023	0	0.022176	0	0.264534	0.767689	0.641279	0.973219	2.67418	3.50335	1.45992
Pl09G0000113500.v1	Pl09	10219851	10219955	Reverse	NF	NF	0	0	0	1	0	0	0	2.48351	1.62664	0.429046	0.422823	0	1.28171	0.10418	0.245747	0	0	0.216486	0	0.09848	0	1.05544	0.256234	0	2.97714	5.33987	7.19325	1.45008
Pl09G0000113600.v1	Pl09	10221803	10222733	Reverse	NF	NF	0	0	0	1	0	0	0	3.84084	4.66078	0.302782	0.517893	1.11125	0.712569	0.381909	0.814437	0.217486	0.266689	0.110474	0.365799	0.510403	0.626686	1.02489	0.857362	0.680988	6.18436	6.74337	5.83008	1.89978
Pl09G0000152100.v1	Pl09	14576926	14577033	Forward	NF	NF	0	0	0	1	0	0	0	13.4986	2.6664	1.18868	1.84499	2.08674	3.37204	1.87633	3.12986	0.336114	0.106126	0.40433	0.131159	0.257313	0.829393	0.32122	0	0.280745	0.552374	0.923343	3.57192	0.090372
Pl09G0000156100.v1	Pl09	15058747	15061271	Reverse	NF	NF	0	0	0	0	1	0	0	0.007888	0.017947	0	0.007888	0	0	0	0	0	0	0.009965	0	0.007982	0	0	0	0	0	0.056406	0	0
Pl09G0000218300.v1	Pl09	24219539	24221817	Forward	NF	NF	0	0	0	0	1	0	0	0	0	0	0	0	0	0	0	0	0	0	0	0	0	0	0	0	0	0	0	0
Pl09G0000253100.v1	Pl09	29111019	29111327	Forward	NF	NF	0	0	0	0	1	0	0	0	0.179424	0	0	0	0	0	0	0	0	0	0	0	0	0	0.105004	0.07442	0.334848	0.06233	0	0.344019
Pl09G0000297900.v1	Pl09	35044544	35045353	Reverse	NF	NF	0	0	0	1	0	0	0	4.8347	0.0264	1.45013	1.23051	1.4337	0.390825	0.329535	0	0	0	0.0264	0	0	0	0	0	0	0	0	0	0
Pl09G0000300700.v1	Pl09	35358294	35361154	Forward	NF	NF	0	0	0	0	0	0	0	0	2.54268	0	0	0	0	0	0	0.174521	0.348153	0.14873	0.2163	0.063717	0.396903	0.441112	0.571705	0.181536	0.520485	1.42661	2.17333	1.2647
Pl09G0000350400.v1	Pl09	40153431	40153900	Reverse	NF	NF	0	0	0	0	0	0	0	0	0	0	0	0	0	0	0	0	0	0	0	0	0	0	0	0	0	0	0	0
Pl10G0000003200.v1	Pl10	226772	228542	Reverse	NF	NF	0	0	0	1	0	0	0	0	14.4992	0	0	0	0	0	0	1.01713	2.00417	1.76074	2.34794	2.13635	2.76825	1.48754	0.716977	0.260106	0	0	0	0
Pl10G0000033800.v1	Pl10	3585891	3590950	Reverse	maker-Pl10-exonerate_protein2genome-gene-4.31	Pl10	4283327	4295462	78.2	1	0	0	0	0.599348	0.684401	0	0.080554	0	0.120525	0.244666	0.153603	0.120391	0.0841	0.050638	0	0.031321	0.05233	0.095065	0.098408	0.152148	0.143141	0.623641	0	0
Pl10G0000037300.v1	Pl10	3912340	3915771	Forward	NF	NF	0	0	0	1	0	0	0	16.5351	0	3.903	1.11942	2.56967	3.60513	2.39088	2.94705	0	0	0	0	0	0	0	0	0	0	0	0	0
Pl10G0000037400.v1	Pl10	3916923	3917199	Reverse	NF	NF	0	0	0	1	0	0	0	24.8021	0	4.91928	4.93823	4.41858	3.25224	4.1021	3.17167	0	0	0	0	0	0	0	0	0	0	0	0	0
Pl10G0000041500.v1	Pl10	4466054	4469074	Forward	maker-Pl10-exonerate_protein2genome-gene-5.0	Pl10	4970694	4972838	57.97	0	1	0	0	0	0.138588	0	0	0	0	0	0	0	0	0	0	0	0.138588	0	0	0	0	0	0	0
Pl10G0000041600.v1	Pl10	4468832	4470190	Reverse	NF	NF	0	0	0	0	1	0	0	0	1.28977	0	0	0	0	0	0	0	0	0	0.414639	0.191886	0.149798	0.533442	0	0	0	0	0	0
Pl10G0000043000.v1	Pl10	4652067	4654682	Forward	NF	NF	0	0	0	0	0	0	0	3.00922	0.197198	1.0664	0.888717	0.748455	0.121151	0.102982	0.081513	0	0	0.072472	0	0	0	0	0	0.124726	0	0	0	0
Pl10G0000073700.v1	Pl10	9271742	9272786	Reverse	NF	NF	0	0	0	0	0	0	0	2.16369	447.01	0.359027	0.447882	0.287685	0.333365	0.71218	0.023555	50.1514	40.831	40.2409	71.7457	72.5014	58.4402	47.2976	16.1838	49.6182	112.15	88.2253	22.5931	33.8566
Pl10G0000090800.v1	Pl10	11842145	11843607	Forward	NF	NF	0	0	0	0	1	0	0	0.013808	0.022712	0	0	0.013808	0	0	0	0	0	0	0	0	0.022712	0	0	0	0	0	0	0
Pl10G0000118200.v1	Pl10	16670631	16675817	Reverse	NF	NF	0	0	0	0	1	0	0	0	0	0	0	0	0	0	0	0	0	0	0	0	0	0	0	0	0	0	0	0
Pl10G0000138200.v1	Pl10	20817581	20819461	Reverse	NF	NF	0	0	0	1	0	0	0	0	0	0	0	0	0	0	0	0	0	0	0	0	0	0	0	0	0	0	0	0
Pl10G0000148500.v1	Pl10	22367879	22370982	Reverse	maker-Pl10-exonerate_protein2genome-gene-1.68	Pl10	1722344	1722822	41.29	0	0	1	0	2.17551	0.296187	0.561882	0.284875	0.410127	0	0.466412	0.45221	0	0	0.100014	0.039769	0.156404	0	0	0	0	0	0	0	0.074745
Pl10G0000157200.v1	Pl10	23585341	23585589	Reverse	NF	NF	0	0	0	1	0	0	0	14.7567	0.02633	3.88803	3.13366	3.79455	1.39706	1.16462	1.37883	0	0.02633	0	0	0	0	0	0	0	0	0	0	0
Pl10G0000163000.v1	Pl10	24689848	24691515	Reverse	NF	NF	0	0	0	1	0	1	0	0	0	0	0	0	0	0	0	0	0	0	0	0	0	0	0	0	0	0	0	0
Pl10G0000163100.v1	Pl10	24691591	24692163	Reverse	maker-Pl10-exonerate_protein2genome-gene-38.41	Pl10	38547462	38549959	45.43	1	0	1	0	0	0	0	0	0	0	0	0	0	0	0	0	0	0	0	0	0	0	0	0	0
Pl10G0000196600.v1	Pl10	30901960	30903865	Reverse	NF	NF	0	0	0	0	1	0	0	0	0	0	0	0	0	0	0	0	0	0	0	0	0	0	0	0	0	0	0	0
Pl10G0000207400.v1	Pl10	33563837	33566468	Reverse	NF	NF	0	0	0	1	0	0	0	0	0	0	0	0	0	0	0	0	0	0	0	0	0	0	0	0	0	0	0	0
Pl10G0000237200.v1	Pl10	40171432	40172634	Reverse	NF	NF	0	0	0	1	0	0	0	0	0	0	0	0	0	0	0	0	0	0	0	0	0	0	0	0	0	0	0	0
Pl10G0000239800.v1	Pl10	40467231	40469699	Reverse	NF	NF	0	0	0	1	0	0	0	0	0	0	0	0	0	0	0	0	0	0	0	0	0	0	0	0	0	0	0	0
Pl10G0000278600.v1	Pl10	46003796	46005575	Reverse	NF	NF	0	0	0	1	0	0	0	3.83189	0.121079	0.264867	0.589011	0.803868	0.897937	0.435444	0.84076	0	0.031155	0.028706	0.061218	0	0	0	0	0	0	0	0	0
Pl10G0000285900.v1	Pl10	46770226	46773630	Forward	NF	NF	0	0	0	1	0	0	0	0	0	0	0	0	0	0	0	0	0	0	0	0	0	0	0	0	0	0	0	0
Pl10G0000293800.v1	Pl10	47677259	47677464	Reverse	maker-Pl10-exonerate_protein2genome-gene-41.142	Pl10	41435672	41435833	100	0	0	0	0	1.15005	5.24487	0.006072	0.172413	0.682502	0.133026	0.052802	0.103235	0.65745	0.358666	0.633668	0.770271	0.714248	0.429805	0.423002	0.761209	0.496554	0.034454	0.013062	0.01887	0.028319
Pl10G0000294300.v1	Pl10	47715927	47717131	Forward	NF	NF	0	0	0	1	0	0	0	0	0	0	0	0	0	0	0	0	0	0	0	0	0	0	0	0	0	0	0	0
Pl10G0000294500.v1	Pl10	47725154	47739097	Reverse	NF	NF	0	0	0	1	0	0	0	0.872627	1.91007	0.128427	0.210452	0.169638	0.107463	0.08161	0.175037	0.403717	0.244387	0.213692	0.30075	0.248799	0.225744	0.174542	0.038061	0.060375	2.10545	1.70376	1.65814	0.565757
Pl10G0000299800.v1	Pl10	48298299	48301582	Reverse	NF	NF	0	0	0	0	1	0	0	0	0	0	0	0	0	0	0	0	0	0	0	0	0	0	0	0	0	0	0	0
Pl10G0000350900.v1	Pl10	53396291	53397466	Reverse	maker-Pl10-exonerate_protein2genome-gene-42.0	Pl10	41891092	41893683	47.28	1	0	0	0	0	0	0	0	0	0	0	0	0	0	0	0	0	0	0	0	0	0	0	0	0
Pl10G0000358600.v1	Pl10	53918156	53921102	Reverse	maker-Pl10-exonerate_protein2genome-gene-46.474	Pl10	47643211	47644536	90.42	0	1	0	0	131.931	64.4591	27.6876	27.1602	24.2867	15.9137	19.0743	17.8082	7.49308	7.24613	6.88745	10.8047	8.70196	7.04643	5.86764	3.92872	6.48301	7.51766	3.11849	1.7444	1.56848
Pl11G0000016400.v1	Pl11	1146822	1149607	Reverse	maker-Pl11-exonerate_protein2genome-gene-1.141	Pl11	1198655	1206980	31.22	1	0	0	0	0	5.4712	0	0	0	0	0	0	0.385626	0.779815	0.548774	0.68731	0.511396	0.415082	0.217359	1.15426	0.771576	0	12.8363	0	0
Pl11G0000016800.v1	Pl11	1181968	1184850	Reverse	maker-Pl11-exonerate_protein2genome-gene-1.141	Pl11	1198655	1206980	34.46	0	1	0	0	0.11429	0.010696	0	0	0	0.107365	0.006925	0	0	0	0	0	0	0	0.010696	0	0	0.081851	8.06785	0.139441	0.075253
Pl11G0000039400.v1	Pl11	2971108	2973113	Forward	NF	NF	0	0	0	0	0	0	0	0	0	0	0	0	0	0	0	0	0	0	0	0	0	0	0	0	0	0	0	0
Pl11G0000109100.v1	Pl11	9251899	9252271	Forward	maker-Pl11-exonerate_protein2genome-gene-9.46	Pl11	9364118	9364550	82.82	0	0	0	0	22.0168	160.372	0.366706	1.10529	1.16148	4.5166	7.06703	7.79969	5.03084	6.44026	10.0823	12.5938	14.5563	19.2991	18.1992	67.3907	6.77983	144.122	586.173	240.458	63.9487
Pl11G0000116600.v1	Pl11	10363419	10364478	Forward	NF	NF	0	0	0	0	1	1	1	3.88919	1.62851	0	0	0	0.514838	1.05692	2.31743	0	0	0.258276	0.360576	0.534534	0	0.475125	0	0	0	0	0	0
Pl11G0000205100.v1	Pl11	23565202	23567245	Forward	NF	NF	0	0	0	0	0	0	0	0	0	0	0	0	0	0	0	0	0	0	0	0	0	0	0	0	0	0	0	0
Pl11G0000220700.v1	Pl11	25754638	25756558	Forward	NF	NF	0	0	0	1	0	0	0	0	0	0	0	0	0	0	0	0	0	0	0	0	0	0	0	0	0	0	0	0
Pl11G0000224300.v1	Pl11	26406896	26410039	Forward	NF	NF	0	0	0	1	0	0	0	0	0	0	0	0	0	0	0	0	0	0	0	0	0	0	0	0	0	0	0	0
Pl11G0000255800.v1	Pl11	31521498	31525168	Forward	NF	NF	0	0	0	0	1	0	0	0	0	0	0	0	0	0	0	0	0	0	0	0	0	0	0	0	0	0	0	0
Pl11G0000281100.v1	Pl11	34637023	34639166	Reverse	maker-Pl11-exonerate_protein2genome-gene-31.48	Pl11	31274507	31276651	94.03	0	1	0	0	49.2172	94.245	6.88641	6.87308	6.86332	9.24813	9.81375	9.53247	9.22848	8.34049	7.52538	12.0861	11.6666	10.6992	15.34	14.0667	5.29208	7.03865	4.63967	3.76398	4.02166
Pl11G0000285500.v1	Pl11	35143524	35144736	Forward	NF	NF	0	0	0	1	0	0	0	0	2.55385	0	0	0	0	0	0	0.278296	0.231681	0	0.925551	0	0.560842	0	0.557478	0	0.977812	0.401687	0	0.325509
Pl11G0000285600.v1	Pl11	35144801	35147507	Forward	NF	NF	0	0	0	1	0	0	0	0	3.36838	0	0	0	0	0	0	0.329704	0.644292	0.213211	0	0.151133	0	0.304297	0.789635	0.936109	3.24471	0.329253	0	0.404081
Pl11G0000286800.v1	Pl11	35225326	35227446	Forward	NF	NF	0	0	0	1	0	0	0	0	0	0	0	0	0	0	0	0	0	0	0	0	0	0	0	0	0	0	0	0
Pl11G0000308700.v1	Pl11	37792860	37795711	Reverse	NF	NF	0	0	0	1	0	0	0	0	0	0	0	0	0	0	0	0	0	0	0	0	0	0	0	0	0	0	0	0
Pl11G0000317900.v1	Pl11	38917712	38918218	Reverse	NF	NF	0	0	0	1	0	1	0	2.72602	1.4502	0.181257	0.58263	1.04393	0	0	0.918205	0	0.520702	0.37686	0	0	0	0.552637	0	0	0	0	0	0
Pl11G0000341900.v1	Pl11	42362890	42363399	Forward	NF	NF	0	0	0	0	1	0	0	5.16692	3.58261	0.58369	0.270751	0	1.60328	1.77382	0.935373	0.915036	1.19695	0.289205	0.009243	0.243304	0	0.369088	0	0.559783	0	0	0	0
Pl11G0000343300.v1	Pl11	42538352	42539546	Forward	NF	NF	0	0	0	0	1	0	0	0.157434	126.172	0	0.157434	0	0	0	0	10.4281	13.6002	12.1677	15.6775	13.0665	15.0531	21.5374	8.49738	16.1441	0	0	0	0
Pl11G0000346000.v1	Pl11	42792256	42794008	Forward	NF	NF	0	0	0	1	0	0	0	4.33587	0.29697	0.517211	0.60711	0.767113	1.0049	0.619609	0.819932	0	0.038418	0	0.127917	0	0	0.130635	0	0	0	0	0	0
Pl11G0000346100.v1	Pl11	42796700	42799692	Reverse	NF	NF	0	0	0	1	0	0	0	0	0	0	0	0	0	0	0	0	0	0	0	0	0	0	0	0	0	0	0	0
Pl11G0000347600.v1	Pl11	42971938	42972264	Reverse	NF	NF	0	0	0	0	0	0	0	6.22499	13.6402	0.59915	0.710634	0.396056	0.86252	1.81876	1.83787	1.80279	1.11614	1.38476	2.06683	2.17604	1.60542	1.50552	0.808155	1.17458	0.742067	0.119297	0.245876	0.410024
Pl11G0000347700.v1	Pl11	42972857	42974230	Reverse	NF	NF	0	0	0	0	0	0	0	5.87383	5.98978	1.06033	0.672885	0.407226	1.32496	1.01759	1.39083	0.483009	0.548187	0.461915	0.952058	0.859673	1.04032	0.925421	0.146476	0.572725	0.478117	0.173392	0.312086	0.427268
Pl11G0000351500.v1	Pl11	43380622	43381185	Reverse	NF	NF	0	0	0	1	0	0	0	0	1.05653	0	0	0	0	0	0	0	0	0.195812	0.382543	0	0	0.357414	0	0.120757	0.746125	3.60081	0	0
Pl11G0000373700.v1	Pl11	45617521	45619111	Reverse	NF	NF	0	0	0	1	0	0	0	0	0	0	0	0	0	0	0	0	0	0	0	0	0	0	0	0	0	0	0	0
Pl11G0000377500.v1	Pl11	45928716	45931474	Forward	NF	NF	0	0	0	0	1	0	0	0.186506	0.584874	0	0	0	0	0.09344	0.093066	0	0	0	0.335075	0.076492	0.106428	0	0	0.066879	0	0	0	0
Pl11G0000389900.v1	Pl11	46846246	46847340	Reverse	NF	NF	0	0	0	0	1	0	0	0.004469	0.087597	0	0.004469	0	0	0	0	0.080646	0	0.006951	0	0	0	0	0	0	0	0	0	0
Pl11G0000390000.v1	Pl11	46847592	46848761	Reverse	NF	NF	0	0	0	0	1	0	0	0	0	0	0	0	0	0	0	0	0	0	0	0	0	0	0	0	0	0	0	0
tig000001480040.v1	tig00000148	17840	19360	Forward	NF	NF	0	0	0	0	1	0	0	1006.4	3541.46	212.312	132.298	107.335	235.095	178.305	141.059	150.998	101.95	697.578	638.037	269.324	220.223	676.874	101.045	685.429	2368.34	2842.84	4392.08	4959.58
tig000003530040.v1	tig00000353	29683	30072	Reverse	NF	NF	0	0	0	1	0	0	0	1.67927	1.03655	0	0	0.378675	0	0.999288	0.301311	0	0.416407	0.052436	0.187999	0	0	0.379706	0	0	0	0	0	0
tig000006260020.v1	tig00000626	25607	27557	Reverse	NF	NF	0	0	0	0	1	0	0	1.94584	8.35864	0.53037	0.157916	0.283089	0.438025	0.405887	0.130549	0.219475	0.305669	0.984235	0.817572	0.999772	0.710684	0.610811	0.650769	3.05965	4.62507	3.25886	3.95066	10.1373
tig000006260030.v1	tig00000626	31932	32454	Reverse	NF	NF	0	0	0	0	1	0	0	3.74147	4.55636	0.730573	0.769275	0.790505	0.538645	0.609319	0.30315	0.175865	0.191906	0.619969	0.725159	0.562859	0.379383	0.934678	0	0.966539	3.31205	1.53387	2.77838	3.29741
tig000009300030.v1	tig00000930	19007	22736	Forward	NF	NF	0	0	0	0	1	0	0	3.12557	6.42725	0.544193	0.355875	0.651243	0.552243	0.444785	0.577235	0.497762	0.468842	0.839689	0.848623	0.73005	0.538065	0.461727	1.28186	0.760632	2.45062	3.17117	2.19496	2.12
tig000009300050.v1	tig00000930	26837	29134	Forward	NF	NF	0	0	0	0	0	0	0	20.7445	45.9957	4.36642	3.63801	3.5913	3.18964	2.88822	3.07095	4.99973	4.6267	6.78491	7.10051	5.06769	5.62589	3.96939	3.93088	3.88998	10.3085	7.62491	4.46514	6.82651
tig000009300060.v1	tig00000930	35247	37967	Forward	NF	NF	0	0	0	0	0	0	0	22.5959	35.3617	4.18684	3.40619	3.49552	4.02173	3.66975	3.81591	2.44729	2.55615	4.7126	4.65607	2.73688	2.7676	4.26249	4.2627	6.95991	35.8049	24.3961	15.5738	18.5609
tig000020210750.v1	tig00002021	1270473	1274691	Forward	NF	NF	0	0	0	0	0	0	0	0	0	0	0	0	0	0	0	0	0	0	0	0	0	0	0	0	0	0	0	0
tig000020530070.v1	tigPlChl002	19076	20065	Forward	NF	NF	0	0	0	0	0	0	0	6.71665	23.0613	1.57284	2.09064	1.23823	0.694479	0.59095	0.529515	3.69078	3.00915	4.10337	1.74288	1.29716	1.40414	0.659393	1.55686	5.5976	3.62051	0.690189	2.77353	5.56033
tig000020530080.v1	tigPlChl002	20627	20830	Reverse	NF	NF	0	0	0	0	0	0	0	4.11972	30.596	0.757752	0.978877	0.986249	0.212705	0.897638	0.286494	0.789814	0.873142	2.09299	0.940672	0.682945	1.87817	0.684585	3.64561	19.0081	6.89028	2.69144	36.3195	68.8103
tig000020530090.v1	tigPlChl002	20913	21527	Reverse	NF	NF	0	0	0	0	0	0	0	5.53257	46.2572	1.61457	1.39075	0.9018	0.550384	0.378307	0.696758	0.869334	1.09028	1.76292	0.726367	0.760535	0.479739	1.749	2.33765	36.4814	14.8428	7.53362	51.7459	103.172
tig000020530100.v1	tigPlChl002	22339	22764	Reverse	NF	NF	0	0	0	0	0	0	0	2.88233	19.2688	0.649169	0.720944	0.336766	0.271477	0.588178	0.315795	0.979593	0.81661	0.658633	0.670452	0.382307	0.469138	0.592857	0.601935	14.0973	3.74827	2.58862	9.39941	22.4064
tig000020530110.v1	tigPlChl002	23438	23767	Reverse	NF	NF	0	0	0	0	0	0	0	174.915	618.935	40.6857	36.2868	34.4521	23.4974	18.6988	21.2941	76.3807	69.8195	71.5592	58.349	42.3824	46.1202	27.535	38.4989	188.29	98.4645	43.3409	152.983	202.147

## Sheet: SupplTable6_genesSVs_WC_Andean
Gene Id	Chr	Start	End	Strand	Ortholog Id	Chr	Start	End	Protein identity
maker-Pl01-exonerate_protein2genome-gene-10.83	Pl01	9904263	9905801	Reverse	NF	NF	0	0	0
maker-Pl01-exonerate_protein2genome-gene-13.43	Pl01	13564630	13565139	Forward	NF	NF	0	0	0
maker-Pl01-exonerate_protein2genome-gene-15.13	Pl01	15841146	15841631	Forward	NF	NF	0	0	0
maker-Pl01-exonerate_protein2genome-gene-16.56	Pl01	16590961	16591374	Reverse	NF	NF	0	0	0
maker-Pl01-exonerate_protein2genome-gene-17.5	Pl01	17184719	17186056	Forward	NF	NF	0	0	0
maker-Pl01-exonerate_protein2genome-gene-17.73	Pl01	17808745	17808951	Reverse	NF	NF	0	0	0
maker-Pl01-exonerate_protein2genome-gene-18.8	Pl01	18163002	18163789	Forward	NF	NF	0	0	0
maker-Pl01-exonerate_protein2genome-gene-21.17	Pl01	21247572	21248133	Forward	NF	NF	0	0	0
maker-Pl01-exonerate_protein2genome-gene-22.12	Pl01	22461265	22461540	Forward	NF	NF	0	0	0
maker-Pl01-exonerate_protein2genome-gene-22.74	Pl01	22404629	22404964	Reverse	NF	NF	0	0	0
maker-Pl01-exonerate_protein2genome-gene-23.81	Pl01	23697220	23697778	Reverse	NF	NF	0	0	0
maker-Pl01-exonerate_protein2genome-gene-25.110	Pl01	25889784	25890014	Reverse	NF	NF	0	0	0
maker-Pl01-exonerate_protein2genome-gene-26.113	Pl01	26743649	26744474	Reverse	NF	NF	0	0	0
maker-Pl01-exonerate_protein2genome-gene-26.55	Pl01	26781964	26782673	Forward	NF	NF	0	0	0
maker-Pl01-exonerate_protein2genome-gene-27.30	Pl01	27525091	27525396	Forward	NF	NF	0	0	0
maker-Pl01-exonerate_protein2genome-gene-28.108	Pl01	28368608	28370030	Reverse	NF	NF	0	0	0
maker-Pl01-exonerate_protein2genome-gene-28.77	Pl01	27968984	27969373	Reverse	NF	NF	0	0	0
maker-Pl01-exonerate_protein2genome-gene-28.79	Pl01	27968608	27968823	Reverse	NF	NF	0	0	0
maker-Pl01-exonerate_protein2genome-gene-29.13	Pl01	29084329	29085033	Forward	NF	NF	0	0	0
maker-Pl01-exonerate_protein2genome-gene-30.143	Pl01	30373977	30374670	Reverse	NF	NF	0	0	0
maker-Pl01-exonerate_protein2genome-gene-30.186	Pl01	30854598	30857052	Reverse	NF	NF	0	0	0
maker-Pl01-exonerate_protein2genome-gene-30.35	Pl01	30374695	30374907	Forward	NF	NF	0	0	0
maker-Pl01-exonerate_protein2genome-gene-31.75	Pl01	30945537	30946538	Reverse	NF	NF	0	0	0
maker-Pl01-exonerate_protein2genome-gene-36.129	Pl01	36067649	36068005	Reverse	NF	NF	0	0	0
maker-Pl01-exonerate_protein2genome-gene-36.145	Pl01	36203734	36203928	Reverse	NF	NF	0	0	0
maker-Pl01-exonerate_protein2genome-gene-36.38	Pl01	36204183	36205151	Forward	NF	NF	0	0	0
maker-Pl01-exonerate_protein2genome-gene-38.156	Pl01	38150335	38151840	Reverse	NF	NF	0	0	0
maker-Pl01-exonerate_protein2genome-gene-3.98	Pl01	3237662	3237939	Reverse	NF	NF	0	0	0
maker-Pl01-exonerate_protein2genome-gene-41.30	Pl01	41128258	41128978	Forward	NF	NF	0	0	0
maker-Pl01-exonerate_protein2genome-gene-41.78	Pl01	41573836	41574033	Forward	NF	NF	0	0	0
maker-Pl01-exonerate_protein2genome-gene-4.9	Pl01	4077364	4078254	Forward	NF	NF	0	0	0
maker-Pl01-exonerate_protein2genome-gene-6.30	Pl01	6100163	6100997	Forward	NF	NF	0	0	0
maker-Pl01-exonerate_protein2genome-gene-8.130	Pl01	8718304	8719640	Reverse	Pl01G0000084000.v1	Pl01	8314620	8316190	91.26
maker-Pl01-exonerate_protein2genome-gene-8.91	Pl01	8302158	8303391	Reverse	NF	NF	0	0	0
maker-Pl01-exonerate_protein2genome-gene-8.99	Pl01	8299737	8300268	Reverse	NF	NF	0	0	0
maker-Pl01-exonerate_protein2genome-gene-9.63	Pl01	9479435	9479632	Forward	NF	NF	0	0	0
maker-Pl02-exonerate_protein2genome-gene-0.231	Pl02	669506	669691	Reverse	NF	NF	0	0	0
maker-Pl02-exonerate_protein2genome-gene-10.81	Pl02	10092296	10092726	Reverse	NF	NF	0	0	0
maker-Pl02-exonerate_protein2genome-gene-12.102	Pl02	12191352	12192085	Reverse	NF	NF	0	0	0
maker-Pl02-exonerate_protein2genome-gene-1.253	Pl02	1493743	1494790	Reverse	NF	NF	0	0	0
maker-Pl02-exonerate_protein2genome-gene-12.93	Pl02	12091920	12092642	Reverse	NF	NF	0	0	0
maker-Pl02-exonerate_protein2genome-gene-15.10	Pl02	15068751	15068930	Forward	NF	NF	0	0	0
maker-Pl02-exonerate_protein2genome-gene-17.26	Pl02	17494633	17495126	Forward	NF	NF	0	0	0
maker-Pl02-exonerate_protein2genome-gene-17.27	Pl02	17495288	17495464	Forward	NF	NF	0	0	0
maker-Pl02-exonerate_protein2genome-gene-18.64	Pl02	18398095	18398415	Reverse	NF	NF	0	0	0
maker-Pl02-exonerate_protein2genome-gene-19.41	Pl02	19388078	19389838	Reverse	NF	NF	0	0	0
maker-Pl02-exonerate_protein2genome-gene-20.3	Pl02	20310315	20310662	Forward	NF	NF	0	0	0
maker-Pl02-exonerate_protein2genome-gene-2.88	Pl02	2574379	2574561	Forward	NF	NF	0	0	0
maker-Pl02-exonerate_protein2genome-gene-36.24	Pl02	36778824	36779422	Forward	NF	NF	0	0	0
maker-Pl02-exonerate_protein2genome-gene-36.34	Pl02	36199745	36199915	Reverse	NF	NF	0	0	0
maker-Pl02-exonerate_protein2genome-gene-37.58	Pl02	37276263	37276913	Reverse	NF	NF	0	0	0
maker-Pl02-exonerate_protein2genome-gene-38.2	Pl02	37931330	37932157	Forward	NF	NF	0	0	0
maker-Pl02-exonerate_protein2genome-gene-38.7	Pl02	37947167	37949062	Forward	NF	NF	0	0	0
maker-Pl02-exonerate_protein2genome-gene-38.80	Pl02	38475328	38476050	Reverse	NF	NF	0	0	0
maker-Pl02-exonerate_protein2genome-gene-39.78	Pl02	39163690	39164498	Reverse	NF	NF	0	0	0
maker-Pl02-exonerate_protein2genome-gene-40.131	Pl02	40839239	40840397	Reverse	NF	NF	0	0	0
maker-Pl02-exonerate_protein2genome-gene-41.100	Pl02	41510875	41511988	Reverse	NF	NF	0	0	0
maker-Pl02-exonerate_protein2genome-gene-41.56	Pl02	40993038	40993482	Reverse	NF	NF	0	0	0
maker-Pl02-exonerate_protein2genome-gene-41.92	Pl02	41399510	41400605	Reverse	NF	NF	0	0	0
maker-Pl02-exonerate_protein2genome-gene-4.3	Pl02	3947348	3947602	Forward	NF	NF	0	0	0
maker-Pl02-exonerate_protein2genome-gene-45.155	Pl02	45340890	45341654	Reverse	NF	NF	0	0	0
maker-Pl02-exonerate_protein2genome-gene-46.114	Pl02	46083026	46084096	Reverse	NF	NF	0	0	0
maker-Pl02-exonerate_protein2genome-gene-46.186	Pl02	46723673	46724301	Reverse	NF	NF	0	0	0
maker-Pl02-exonerate_protein2genome-gene-47.132	Pl02	47249891	47251155	Reverse	NF	NF	0	0	0
maker-Pl02-exonerate_protein2genome-gene-50.163	Pl02	50591370	50592121	Reverse	NF	NF	0	0	0
maker-Pl02-exonerate_protein2genome-gene-51.195	Pl02	51720333	51720647	Reverse	NF	NF	0	0	0
maker-Pl02-exonerate_protein2genome-gene-5.190	Pl02	5607603	5607794	Reverse	NF	NF	0	0	0
maker-Pl02-exonerate_protein2genome-gene-52.17	Pl02	52037323	52037551	Forward	NF	NF	0	0	0
maker-Pl02-exonerate_protein2genome-gene-52.212	Pl02	52324213	52325037	Reverse	NF	NF	0	0	0
maker-Pl02-exonerate_protein2genome-gene-56.128	Pl02	56771637	56772417	Forward	NF	NF	0	0	0
maker-Pl02-exonerate_protein2genome-gene-56.297	Pl02	56487006	56487212	Reverse	NF	NF	0	0	0
maker-Pl02-exonerate_protein2genome-gene-6.172	Pl02	6841599	6842403	Reverse	Pl02G0000079800.v1	Pl02	6377083	6378800	94.29
maker-Pl02-exonerate_protein2genome-gene-7.1	Pl02	6840633	6842181	Forward	NF	NF	0	0	0
maker-Pl02-exonerate_protein2genome-gene-7.140	Pl02	7234374	7234992	Reverse	NF	NF	0	0	0
maker-Pl02-exonerate_protein2genome-gene-7.78	Pl02	7477431	7477586	Forward	NF	NF	0	0	0
maker-Pl02-exonerate_protein2genome-gene-8.172	Pl02	8771457	8772461	Reverse	NF	NF	0	0	0
maker-Pl02-exonerate_protein2genome-gene-9.156	Pl02	9474060	9474947	Reverse	NF	NF	0	0	0
maker-Pl02-exonerate_protein2genome-gene-9.29	Pl02	9141948	9142317	Forward	NF	NF	0	0	0
maker-Pl03-exonerate_protein2genome-gene-0.73	Pl03	795749	796714	Forward	NF	NF	0	0	0
maker-Pl03-exonerate_protein2genome-gene-20.152	Pl03	20841085	20841320	Reverse	NF	NF	0	0	0
maker-Pl03-exonerate_protein2genome-gene-20.51	Pl03	20562311	20562541	Forward	NF	NF	0	0	0
maker-Pl03-exonerate_protein2genome-gene-20.72	Pl03	20808990	20809543	Forward	NF	NF	0	0	0
maker-Pl03-exonerate_protein2genome-gene-21.11	Pl03	21087301	21087765	Forward	NF	NF	0	0	0
maker-Pl03-exonerate_protein2genome-gene-21.124	Pl03	21580483	21580662	Reverse	NF	NF	0	0	0
maker-Pl03-exonerate_protein2genome-gene-21.60	Pl03	21812823	21814948	Forward	NF	NF	0	0	0
maker-Pl03-exonerate_protein2genome-gene-23.48	Pl03	23504116	23504641	Forward	NF	NF	0	0	0
maker-Pl03-exonerate_protein2genome-gene-23.87	Pl03	23881621	23882251	Forward	NF	NF	0	0	0
maker-Pl03-exonerate_protein2genome-gene-23.88	Pl03	23880557	23880822	Forward	NF	NF	0	0	0
maker-Pl03-exonerate_protein2genome-gene-24.51	Pl03	24532778	24532948	Forward	NF	NF	0	0	0
maker-Pl03-exonerate_protein2genome-gene-25.103	Pl03	25584269	25584577	Reverse	NF	NF	0	0	0
maker-Pl03-exonerate_protein2genome-gene-26.70	Pl03	26785881	26787168	Forward	Pl03G0000233700.v1	Pl03	28498154	28499710	96.3
maker-Pl03-exonerate_protein2genome-gene-29.126	Pl03	29212070	29213205	Reverse	NF	NF	0	0	0
maker-Pl03-exonerate_protein2genome-gene-29.127	Pl03	29213285	29213510	Reverse	NF	NF	0	0	0
maker-Pl03-exonerate_protein2genome-gene-29.86	Pl03	29860949	29862130	Forward	NF	NF	0	0	0
maker-Pl03-exonerate_protein2genome-gene-29.91	Pl03	29862240	29865812	Forward	NF	NF	0	0	0
maker-Pl03-exonerate_protein2genome-gene-32.172	Pl03	32604705	32604929	Reverse	NF	NF	0	0	0
maker-Pl03-exonerate_protein2genome-gene-34.103	Pl03	34160373	34160668	Reverse	NF	NF	0	0	0
maker-Pl03-exonerate_protein2genome-gene-35.11	Pl03	35051216	35051598	Forward	NF	NF	0	0	0
maker-Pl03-exonerate_protein2genome-gene-38.100	Pl03	38112359	38115442	Reverse	Pl03G0000334900.v1	Pl03	39485328	39488408	74.16
maker-Pl03-exonerate_protein2genome-gene-38.5	Pl03	38036571	38036765	Forward	NF	NF	0	0	0
maker-Pl03-exonerate_protein2genome-gene-38.96	Pl03	38035347	38036316	Reverse	NF	NF	0	0	0
maker-Pl03-exonerate_protein2genome-gene-39.91	Pl03	39684386	39684786	Forward	NF	NF	0	0	0
maker-Pl03-exonerate_protein2genome-gene-39.92	Pl03	39683932	39684159	Forward	NF	NF	0	0	0
maker-Pl03-exonerate_protein2genome-gene-40.214	Pl03	40571215	40572481	Reverse	NF	NF	0	0	0
maker-Pl03-exonerate_protein2genome-gene-4.116	Pl03	4392909	4393269	Reverse	NF	NF	0	0	0
maker-Pl03-exonerate_protein2genome-gene-42.303	Pl03	42714954	42715127	Reverse	NF	NF	0	0	0
maker-Pl03-exonerate_protein2genome-gene-42.77	Pl03	42713259	42713486	Forward	NF	NF	0	0	0
maker-Pl03-exonerate_protein2genome-gene-7.119	Pl03	7721301	7721618	Reverse	NF	NF	0	0	0
maker-Pl04-exonerate_protein2genome-gene-10.82	Pl04	10590493	10590801	Reverse	NF	NF	0	0	0
maker-Pl04-exonerate_protein2genome-gene-11.12	Pl04	11116855	11117025	Forward	NF	NF	0	0	0
maker-Pl04-exonerate_protein2genome-gene-12.31	Pl04	12543961	12544230	Forward	NF	NF	0	0	0
maker-Pl04-exonerate_protein2genome-gene-12.49	Pl04	12617729	12618076	Reverse	NF	NF	0	0	0
maker-Pl04-exonerate_protein2genome-gene-23.26	Pl04	23844196	23844366	Reverse	NF	NF	0	0	0
maker-Pl04-exonerate_protein2genome-gene-3.138	Pl04	3352782	3356670	Reverse	NF	NF	0	0	0
maker-Pl04-exonerate_protein2genome-gene-3.151	Pl04	3357490	3358485	Reverse	NF	NF	0	0	0
maker-Pl04-exonerate_protein2genome-gene-32.30	Pl04	32646777	32647707	Reverse	NF	NF	0	0	0
maker-Pl04-exonerate_protein2genome-gene-35.5	Pl04	35542215	35543395	Forward	NF	NF	0	0	0
maker-Pl04-exonerate_protein2genome-gene-3.57	Pl04	3509489	3510081	Forward	NF	NF	0	0	0
maker-Pl04-exonerate_protein2genome-gene-36.21	Pl04	36759753	36761005	Reverse	NF	NF	0	0	0
maker-Pl04-exonerate_protein2genome-gene-37.37	Pl04	37012222	37013199	Reverse	NF	NF	0	0	0
maker-Pl04-exonerate_protein2genome-gene-39.23	Pl04	39284572	39284742	Forward	NF	NF	0	0	0
maker-Pl04-exonerate_protein2genome-gene-4.113	Pl04	4092913	4093457	Reverse	NF	NF	0	0	0
maker-Pl04-exonerate_protein2genome-gene-41.2	Pl04	41378588	41379345	Forward	NF	NF	0	0	0
maker-Pl04-exonerate_protein2genome-gene-4.132	Pl04	4306821	4307528	Reverse	NF	NF	0	0	0
maker-Pl04-exonerate_protein2genome-gene-4.31	Pl04	4074188	4074733	Forward	Pl04G0000047400.v1	Pl04	4550417	4551361	95.12
maker-Pl04-exonerate_protein2genome-gene-43.23	Pl04	43496988	43497257	Forward	NF	NF	0	0	0
maker-Pl04-exonerate_protein2genome-gene-43.47	Pl04	42823320	42824750	Reverse	NF	NF	0	0	0
maker-Pl04-exonerate_protein2genome-gene-43.51	Pl04	42843443	42843811	Reverse	NF	NF	0	0	0
maker-Pl04-exonerate_protein2genome-gene-43.79	Pl04	43498665	43498985	Reverse	NF	NF	0	0	0
maker-Pl04-exonerate_protein2genome-gene-43.85	Pl04	43567678	43567887	Reverse	NF	NF	0	0	0
maker-Pl04-exonerate_protein2genome-gene-44.55	Pl04	44155509	44157052	Reverse	NF	NF	0	0	0
maker-Pl04-exonerate_protein2genome-gene-45.107	Pl04	45197399	45198302	Reverse	NF	NF	0	0	0
maker-Pl04-exonerate_protein2genome-gene-47.123	Pl04	47098743	47099110	Reverse	NF	NF	0	0	0
maker-Pl04-exonerate_protein2genome-gene-47.174	Pl04	47731877	47732936	Reverse	NF	NF	0	0	0
maker-Pl04-exonerate_protein2genome-gene-47.32	Pl04	47097328	47097648	Forward	NF	NF	0	0	0
maker-Pl04-exonerate_protein2genome-gene-47.53	Pl04	47284123	47284290	Forward	NF	NF	0	0	0
maker-Pl04-exonerate_protein2genome-gene-48.15	Pl04	48010638	48011210	Forward	NF	NF	0	0	0
maker-Pl04-exonerate_protein2genome-gene-4.82	Pl04	4517333	4517835	Forward	NF	NF	0	0	0
maker-Pl04-exonerate_protein2genome-gene-48.32	Pl04	48300060	48300595	Forward	NF	NF	0	0	0
maker-Pl04-exonerate_protein2genome-gene-49.84	Pl04	49080546	49081611	Reverse	NF	NF	0	0	0
maker-Pl04-exonerate_protein2genome-gene-50.169	Pl04	51623245	51623496	Forward	NF	NF	0	0	0
maker-Pl04-exonerate_protein2genome-gene-5.117	Pl04	5472972	5473582	Reverse	NF	NF	0	0	0
maker-Pl04-exonerate_protein2genome-gene-5.121	Pl04	5676713	5677257	Reverse	NF	NF	0	0	0
maker-Pl04-exonerate_protein2genome-gene-5.98	Pl04	5174518	5174799	Reverse	NF	NF	0	0	0
maker-Pl04-exonerate_protein2genome-gene-7.24	Pl04	7191756	7192556	Forward	NF	NF	0	0	0
maker-Pl04-exonerate_protein2genome-gene-7.46	Pl04	7465900	7466513	Forward	NF	NF	0	0	0
maker-Pl04-exonerate_protein2genome-gene-8.49	Pl04	8705889	8717325	Forward	Pl04G0000084000.v1	Pl04	9191029	9214591	92.48
maker-Pl04-exonerate_protein2genome-gene-8.73	Pl04	7969804	7970223	Reverse	NF	NF	0	0	0
maker-Pl04-exonerate_protein2genome-gene-9.18	Pl04	9404962	9405684	Forward	NF	NF	0	0	0
maker-Pl05-exonerate_protein2genome-gene-0.184	Pl05	787901	790308	Reverse	Pl05G0000010400.v1	Pl05	758534	760956	94.23
maker-Pl05-exonerate_protein2genome-gene-16.10	Pl05	16075866	16076048	Forward	NF	NF	0	0	0
maker-Pl05-exonerate_protein2genome-gene-2.49	Pl05	2688431	2688972	Forward	NF	NF	0	0	0
maker-Pl05-exonerate_protein2genome-gene-27.12	Pl05	27764958	27765442	Forward	NF	NF	0	0	0
maker-Pl05-exonerate_protein2genome-gene-28.65	Pl05	28638537	28639288	Reverse	NF	NF	0	0	0
maker-Pl05-exonerate_protein2genome-gene-3.17	Pl05	3093543	3096086	Forward	NF	NF	0	0	0
maker-Pl05-exonerate_protein2genome-gene-32.70	Pl05	32282268	32283015	Reverse	NF	NF	0	0	0
maker-Pl05-exonerate_protein2genome-gene-34.49	Pl05	34554772	34555172	Forward	NF	NF	0	0	0
maker-Pl05-exonerate_protein2genome-gene-34.80	Pl05	34772895	34773443	Forward	NF	NF	0	0	0
maker-Pl05-exonerate_protein2genome-gene-34.86	Pl05	34772702	34772857	Forward	NF	NF	0	0	0
maker-Pl05-exonerate_protein2genome-gene-35.71	Pl05	35766899	35768951	Forward	NF	NF	0	0	0
maker-Pl05-exonerate_protein2genome-gene-36.128	Pl05	36365213	36366180	Reverse	NF	NF	0	0	0
maker-Pl05-exonerate_protein2genome-gene-36.131	Pl05	36366369	36366653	Reverse	NF	NF	0	0	0
maker-Pl05-exonerate_protein2genome-gene-37.23	Pl05	37096370	37096585	Forward	NF	NF	0	0	0
maker-Pl05-exonerate_protein2genome-gene-38.210	Pl05	38794360	38795578	Reverse	NF	NF	0	0	0
maker-Pl05-exonerate_protein2genome-gene-38.99	Pl05	38673748	38674692	Forward	Pl05G0000193200.v1	Pl05	28217635	28218705	47.51
maker-Pl05-exonerate_protein2genome-gene-40.106	Pl05	40851220	40851441	Forward	NF	NF	0	0	0
maker-Pl05-exonerate_protein2genome-gene-40.107	Pl05	40852897	40853064	Forward	NF	NF	0	0	0
maker-Pl05-exonerate_protein2genome-gene-41.111	Pl05	41746901	41747257	Forward	NF	NF	0	0	0
maker-Pl05-exonerate_protein2genome-gene-41.118	Pl05	41929542	41929733	Forward	NF	NF	0	0	0
maker-Pl05-exonerate_protein2genome-gene-41.199	Pl05	42411287	42413830	Forward	NF	NF	0	0	0
maker-Pl05-exonerate_protein2genome-gene-4.13	Pl05	3994122	3994448	Forward	NF	NF	0	0	0
maker-Pl05-exonerate_protein2genome-gene-41.52	Pl05	41422521	41422951	Forward	NF	NF	0	0	0
maker-Pl05-exonerate_protein2genome-gene-4.78	Pl05	3922151	3923738	Reverse	NF	NF	0	0	0
maker-Pl05-exonerate_protein2genome-gene-5.59	Pl05	5127823	5128317	Reverse	NF	NF	0	0	0
maker-Pl05-exonerate_protein2genome-gene-5.73	Pl05	5268575	5269061	Reverse	NF	NF	0	0	0
maker-Pl05-exonerate_protein2genome-gene-5.8	Pl05	5017262	5017836	Forward	NF	NF	0	0	0
maker-Pl05-exonerate_protein2genome-gene-7.32	Pl05	7457201	7457392	Forward	NF	NF	0	0	0
maker-Pl05-exonerate_protein2genome-gene-8.106	Pl05	8854091	8854362	Reverse	Pl05G0000085500.v1	Pl05	8633849	8634880	89.28
maker-Pl05-exonerate_protein2genome-gene-8.61	Pl05	7971219	7971476	Reverse	NF	NF	0	0	0
maker-Pl06-exonerate_protein2genome-gene-0.40	Pl06	843352	844361	Forward	NF	NF	0	0	0
maker-Pl06-exonerate_protein2genome-gene-0.8	Pl06	254790	255697	Forward	NF	NF	0	0	0
maker-Pl06-exonerate_protein2genome-gene-0.88	Pl06	761054	764313	Reverse	Pl06G0000006400.v1	Pl06	782479	786127	98.79
maker-Pl06-exonerate_protein2genome-gene-12.0	Pl06	12107897	12108470	Forward	NF	NF	0	0	0
maker-Pl06-exonerate_protein2genome-gene-16.67	Pl06	16698998	16699303	Forward	NF	NF	0	0	0
maker-Pl06-exonerate_protein2genome-gene-18.127	Pl06	18616911	18617164	Reverse	NF	NF	0	0	0
maker-Pl06-exonerate_protein2genome-gene-18.71	Pl06	18778776	18779249	Forward	Pl06G0000095900.v1	Pl06	14210460	14211323	35.53
maker-Pl06-exonerate_protein2genome-gene-18.72	Pl06	18775951	18778191	Forward	NF	NF	0	0	0
maker-Pl06-exonerate_protein2genome-gene-19.111	Pl06	19627998	19629072	Reverse	NF	NF	0	0	0
maker-Pl06-exonerate_protein2genome-gene-20.64	Pl06	20287693	20289057	Reverse	Pl06G0000135700.v1	Pl06	19067510	19068874	98.58
maker-Pl06-exonerate_protein2genome-gene-2.18	Pl06	2378297	2378467	Forward	NF	NF	0	0	0
maker-Pl06-exonerate_protein2genome-gene-23.151	Pl06	23637597	23638044	Reverse	NF	NF	0	0	0
maker-Pl06-exonerate_protein2genome-gene-23.43	Pl06	23235687	23235875	Forward	NF	NF	0	0	0
maker-Pl06-exonerate_protein2genome-gene-23.44	Pl06	23233861	23234181	Forward	NF	NF	0	0	0
maker-Pl06-exonerate_protein2genome-gene-24.38	Pl06	24268946	24270000	Forward	NF	NF	0	0	0
maker-Pl06-exonerate_protein2genome-gene-29.139	Pl06	29114850	29115288	Reverse	NF	NF	0	0	0
maker-Pl06-exonerate_protein2genome-gene-29.140	Pl06	29114408	29114808	Reverse	NF	NF	0	0	0
maker-Pl06-exonerate_protein2genome-gene-29.17	Pl06	28993844	28994313	Forward	NF	NF	0	0	0
maker-Pl06-exonerate_protein2genome-gene-33.23	Pl06	33059713	33061608	Forward	NF	NF	0	0	0
maker-Pl06-exonerate_protein2genome-gene-35.228	Pl06	35665967	35667233	Reverse	NF	NF	0	0	0
maker-Pl06-exonerate_protein2genome-gene-4.51	Pl06	4125129	4125871	Reverse	NF	NF	0	0	0
maker-Pl06-exonerate_protein2genome-gene-5.0	Pl06	4949552	4950556	Forward	NF	NF	0	0	0
maker-Pl06-exonerate_protein2genome-gene-5.21	Pl06	5787062	5787292	Forward	NF	NF	0	0	0
maker-Pl06-exonerate_protein2genome-gene-7.42	Pl06	7811718	7815807	Forward	NF	NF	0	0	0
maker-Pl07-exonerate_protein2genome-gene-11.100	Pl07	11628438	11629340	Reverse	NF	NF	0	0	0
maker-Pl07-exonerate_protein2genome-gene-11.82	Pl07	11233892	11234169	Reverse	NF	NF	0	0	0
maker-Pl07-exonerate_protein2genome-gene-11.83	Pl07	11233372	11233644	Reverse	NF	NF	0	0	0
maker-Pl07-exonerate_protein2genome-gene-12.125	Pl07	12869200	12869712	Reverse	NF	NF	0	0	0
maker-Pl07-exonerate_protein2genome-gene-13.108	Pl07	13396936	13397644	Reverse	NF	NF	0	0	0
maker-Pl07-exonerate_protein2genome-gene-13.67	Pl07	13038442	13038762	Reverse	NF	NF	0	0	0
maker-Pl07-exonerate_protein2genome-gene-13.8	Pl07	13036823	13037036	Forward	NF	NF	0	0	0
maker-Pl07-exonerate_protein2genome-gene-17.3	Pl07	17268978	17269424	Forward	NF	NF	0	0	0
maker-Pl07-exonerate_protein2genome-gene-22.7	Pl07	21914702	21915191	Reverse	NF	NF	0	0	0
maker-Pl07-exonerate_protein2genome-gene-27.25	Pl07	27177607	27179078	Reverse	NF	NF	0	0	0
maker-Pl07-exonerate_protein2genome-gene-29.4	Pl07	29410724	29411464	Forward	NF	NF	0	0	0
maker-Pl07-exonerate_protein2genome-gene-29.5	Pl07	29604987	29606510	Forward	NF	NF	0	0	0
maker-Pl07-exonerate_protein2genome-gene-31.25	Pl07	31388905	31389666	Reverse	NF	NF	0	0	0
maker-Pl07-exonerate_protein2genome-gene-32.70	Pl07	32390767	32391063	Reverse	NF	NF	0	0	0
maker-Pl07-exonerate_protein2genome-gene-32.71	Pl07	32392923	32393177	Reverse	Pl07G0000221200.v1	Pl07	28633669	28638347	99.17
maker-Pl07-exonerate_protein2genome-gene-32.72	Pl07	32401158	32401565	Reverse	NF	NF	0	0	0
maker-Pl07-exonerate_protein2genome-gene-34.81	Pl07	34058566	34059694	Reverse	NF	NF	0	0	0
maker-Pl07-exonerate_protein2genome-gene-35.94	Pl07	35774221	35774448	Reverse	NF	NF	0	0	0
maker-Pl07-exonerate_protein2genome-gene-36.17	Pl07	36110367	36112806	Forward	NF	NF	0	0	0
maker-Pl07-exonerate_protein2genome-gene-36.35	Pl07	36354611	36355412	Forward	NF	NF	0	0	0
maker-Pl07-exonerate_protein2genome-gene-36.42	Pl07	36427747	36428678	Forward	NF	NF	0	0	0
maker-Pl07-exonerate_protein2genome-gene-36.59	Pl07	36680701	36681829	Forward	NF	NF	0	0	0
maker-Pl07-exonerate_protein2genome-gene-37.127	Pl07	37718503	37719020	Reverse	NF	NF	0	0	0
maker-Pl07-exonerate_protein2genome-gene-39.127	Pl07	39471993	39472812	Reverse	NF	NF	0	0	0
maker-Pl07-exonerate_protein2genome-gene-44.220	Pl07	44809491	44810177	Reverse	NF	NF	0	0	0
maker-Pl07-exonerate_protein2genome-gene-49.229	Pl07	49662443	49663114	Reverse	Pl07G0000380100.v1	Pl07	45604772	45607414	42.66
maker-Pl07-exonerate_protein2genome-gene-50.369	Pl07	51114814	51115199	Reverse	NF	NF	0	0	0
maker-Pl07-exonerate_protein2genome-gene-5.35	Pl07	5225116	5225436	Forward	NF	NF	0	0	0
maker-Pl07-exonerate_protein2genome-gene-6.149	Pl07	6525703	6526832	Reverse	NF	NF	0	0	0
maker-Pl07-exonerate_protein2genome-gene-6.19	Pl07	6070611	6070835	Forward	NF	NF	0	0	0
maker-Pl07-exonerate_protein2genome-gene-6.20	Pl07	6071184	6071354	Forward	NF	NF	0	0	0
maker-Pl07-exonerate_protein2genome-gene-6.62	Pl07	6572408	6572686	Forward	Pl07G0000075800.v1	Pl07	6416871	6417149	100
maker-Pl07-exonerate_protein2genome-gene-7.10	Pl07	6952803	6952970	Forward	NF	NF	0	0	0
maker-Pl07-exonerate_protein2genome-gene-7.139	Pl07	7215575	7215841	Reverse	NF	NF	0	0	0
maker-Pl07-exonerate_protein2genome-gene-8.4	Pl07	7927771	7929050	Forward	NF	NF	0	0	0
maker-Pl08-exonerate_protein2genome-gene-1.106	Pl08	1874361	1875234	Forward	NF	NF	0	0	0
maker-Pl08-exonerate_protein2genome-gene-11.23	Pl08	11494426	11494738	Forward	NF	NF	0	0	0
maker-Pl08-exonerate_protein2genome-gene-11.31	Pl08	11657988	11658713	Forward	NF	NF	0	0	0
maker-Pl08-exonerate_protein2genome-gene-11.75	Pl08	11053678	11053884	Reverse	NF	NF	0	0	0
maker-Pl08-exonerate_protein2genome-gene-1.194	Pl08	1535378	1535632	Reverse	NF	NF	0	0	0
maker-Pl08-exonerate_protein2genome-gene-15.137	Pl08	15456951	15457166	Reverse	NF	NF	0	0	0
maker-Pl08-exonerate_protein2genome-gene-18.3	Pl08	18506534	18507127	Forward	NF	NF	0	0	0
maker-Pl08-exonerate_protein2genome-gene-19.13	Pl08	19471949	19473076	Forward	NF	NF	0	0	0
maker-Pl08-exonerate_protein2genome-gene-19.42	Pl08	19655501	19655737	Reverse	NF	NF	0	0	0
maker-Pl08-exonerate_protein2genome-gene-34.5	Pl08	34538758	34539006	Forward	NF	NF	0	0	0
maker-Pl08-exonerate_protein2genome-gene-34.6	Pl08	34539462	34539686	Forward	NF	NF	0	0	0
maker-Pl08-exonerate_protein2genome-gene-34.7	Pl08	34539185	34539382	Forward	NF	NF	0	0	0
maker-Pl08-exonerate_protein2genome-gene-41.48	Pl08	41487131	41489929	Reverse	Pl08G0000265800.v1	Pl08	39161605	39165231	97.1
maker-Pl08-exonerate_protein2genome-gene-41.50	Pl08	41526291	41529464	Reverse	Pl08G0000266200.v1	Pl08	39223533	39228707	98.32
maker-Pl08-exonerate_protein2genome-gene-43.57	Pl08	43606112	43607217	Reverse	NF	NF	0	0	0
maker-Pl08-exonerate_protein2genome-gene-4.4	Pl08	3974469	3975740	Forward	NF	NF	0	0	0
maker-Pl08-exonerate_protein2genome-gene-44.1	Pl08	43710737	43711982	Forward	NF	NF	0	0	0
maker-Pl08-exonerate_protein2genome-gene-46.0	Pl08	45900661	45901391	Forward	NF	NF	0	0	0
maker-Pl08-exonerate_protein2genome-gene-48.37	Pl08	48577536	48577718	Forward	NF	NF	0	0	0
maker-Pl08-exonerate_protein2genome-gene-5.105	Pl08	5176546	5176737	Reverse	Pl08G0000057800.v1	Pl08	4809471	4809665	90.59
maker-Pl08-exonerate_protein2genome-gene-5.182	Pl08	5877002	5877583	Reverse	NF	NF	0	0	0
maker-Pl08-exonerate_protein2genome-gene-54.49	Pl08	54562356	54563074	Forward	NF	NF	0	0	0
maker-Pl08-exonerate_protein2genome-gene-58.251	Pl08	59920768	59921103	Forward	Pl08G0000438300.v1	Pl08	57226589	57227250	62.3
maker-Pl08-exonerate_protein2genome-gene-58.253	Pl08	59940808	59940993	Forward	Pl08G0000438500.v1	Pl08	57233226	57233411	76.71
maker-Pl08-exonerate_protein2genome-gene-58.429	Pl08	59360907	59361600	Reverse	NF	NF	0	0	0
maker-Pl08-exonerate_protein2genome-gene-58.498	Pl08	59947113	59947448	Reverse	Pl08G0000438300.v1	Pl08	57226589	57227250	62.3
maker-Pl08-exonerate_protein2genome-gene-58.499	Pl08	59927223	59927408	Reverse	Pl08G0000438500.v1	Pl08	57233226	57233411	76.71
maker-Pl08-exonerate_protein2genome-gene-7.35	Pl08	7373837	7374178	Forward	NF	NF	0	0	0
maker-Pl09-exonerate_protein2genome-gene-10.112	Pl09	10180736	10181393	Reverse	NF	NF	0	0	0
maker-Pl09-exonerate_protein2genome-gene-10.89	Pl09	10814086	10814485	Forward	NF	NF	0	0	0
maker-Pl09-exonerate_protein2genome-gene-11.109	Pl09	10944674	10945639	Reverse	NF	NF	0	0	0
maker-Pl09-exonerate_protein2genome-gene-1.131	Pl09	1870226	1870837	Forward	NF	NF	0	0	0
maker-Pl09-exonerate_protein2genome-gene-12.113	Pl09	12187592	12188721	Reverse	NF	NF	0	0	0
maker-Pl09-exonerate_protein2genome-gene-14.104	Pl09	14294804	14295269	Reverse	NF	NF	0	0	0
maker-Pl09-exonerate_protein2genome-gene-15.99	Pl09	15478003	15478715	Reverse	NF	NF	0	0	0
maker-Pl09-exonerate_protein2genome-gene-16.12	Pl09	16237437	16238234	Forward	NF	NF	0	0	0
maker-Pl09-exonerate_protein2genome-gene-18.0	Pl09	18054866	18055529	Forward	NF	NF	0	0	0
maker-Pl09-exonerate_protein2genome-gene-18.25	Pl09	18523689	18524294	Forward	NF	NF	0	0	0
maker-Pl09-exonerate_protein2genome-gene-18.32	Pl09	18315277	18316446	Reverse	NF	NF	0	0	0
maker-Pl09-exonerate_protein2genome-gene-21.137	Pl09	21772392	21772586	Reverse	NF	NF	0	0	0
maker-Pl09-exonerate_protein2genome-gene-21.141	Pl09	21773154	21773339	Reverse	NF	NF	0	0	0
maker-Pl09-exonerate_protein2genome-gene-21.143	Pl09	21785858	21787101	Reverse	Pl09G0000180500.v1	Pl09	18094492	18095735	81.92
maker-Pl09-exonerate_protein2genome-gene-21.38	Pl09	21248014	21249090	Forward	NF	NF	0	0	0
maker-Pl09-exonerate_protein2genome-gene-25.21	Pl09	25383616	25384596	Forward	Pl09G0000188100.v1	Pl09	19207474	19208281	23.08
maker-Pl09-exonerate_protein2genome-gene-25.25	Pl09	25589547	25589777	Forward	NF	NF	0	0	0
maker-Pl09-exonerate_protein2genome-gene-26.17	Pl09	26259268	26259513	Forward	NF	NF	0	0	0
maker-Pl09-exonerate_protein2genome-gene-26.33	Pl09	25935919	25936284	Reverse	NF	NF	0	0	0
maker-Pl09-exonerate_protein2genome-gene-26.35	Pl09	25937830	25938009	Reverse	NF	NF	0	0	0
maker-Pl09-exonerate_protein2genome-gene-26.61	Pl09	26858563	26858940	Reverse	NF	NF	0	0	0
maker-Pl09-exonerate_protein2genome-gene-27.13	Pl09	27377545	27377878	Forward	NF	NF	0	0	0
maker-Pl09-exonerate_protein2genome-gene-27.38	Pl09	27375888	27377489	Reverse	NF	NF	0	0	0
maker-Pl09-exonerate_protein2genome-gene-3.121	Pl09	2902535	2903226	Reverse	NF	NF	0	0	0
maker-Pl09-exonerate_protein2genome-gene-3.135	Pl09	2814639	2814818	Reverse	NF	NF	0	0	0
maker-Pl09-exonerate_protein2genome-gene-32.90	Pl09	32531051	32531595	Reverse	NF	NF	0	0	0
maker-Pl09-exonerate_protein2genome-gene-33.18	Pl09	33484355	33484844	Forward	NF	NF	0	0	0
maker-Pl09-exonerate_protein2genome-gene-33.8	Pl09	33183270	33183530	Forward	NF	NF	0	0	0
maker-Pl09-exonerate_protein2genome-gene-34.104	Pl09	34534642	34536274	Reverse	NF	NF	0	0	0
maker-Pl09-exonerate_protein2genome-gene-35.100	Pl09	35782441	35782694	Reverse	NF	NF	0	0	0
maker-Pl09-exonerate_protein2genome-gene-35.103	Pl09	35782005	35782181	Reverse	NF	NF	0	0	0
maker-Pl09-exonerate_protein2genome-gene-35.68	Pl09	35296234	35296991	Reverse	NF	NF	0	0	0
maker-Pl09-exonerate_protein2genome-gene-35.85	Pl09	35602417	35604871	Reverse	NF	NF	0	0	0
maker-Pl09-exonerate_protein2genome-gene-36.72	Pl09	35949567	35950125	Reverse	NF	NF	0	0	0
maker-Pl09-exonerate_protein2genome-gene-36.75	Pl09	35876220	35876465	Reverse	NF	NF	0	0	0
maker-Pl09-exonerate_protein2genome-gene-38.170	Pl09	38872974	38874378	Reverse	NF	NF	0	0	0
maker-Pl09-exonerate_protein2genome-gene-38.6	Pl09	38000361	38001184	Forward	NF	NF	0	0	0
maker-Pl09-exonerate_protein2genome-gene-39.26	Pl09	39371440	39371676	Forward	NF	NF	0	0	0
maker-Pl09-exonerate_protein2genome-gene-39.88	Pl09	39373225	39373492	Reverse	NF	NF	0	0	0
maker-Pl09-exonerate_protein2genome-gene-39.89	Pl09	39295345	39295689	Reverse	NF	NF	0	0	0
maker-Pl09-exonerate_protein2genome-gene-40.147	Pl09	40896787	40898332	Reverse	NF	NF	0	0	0
maker-Pl09-exonerate_protein2genome-gene-40.66	Pl09	40792145	40792958	Forward	NF	NF	0	0	0
maker-Pl09-exonerate_protein2genome-gene-4.118	Pl09	3971256	3972293	Reverse	NF	NF	0	0	0
maker-Pl09-exonerate_protein2genome-gene-4.119	Pl09	3970105	3970692	Reverse	NF	NF	0	0	0
maker-Pl09-exonerate_protein2genome-gene-42.72	Pl09	42593810	42594520	Forward	Pl09G0000297900.v1	Pl09	35044544	35045353	25.1
maker-Pl09-exonerate_protein2genome-gene-43.70	Pl09	43720890	43721360	Forward	NF	NF	0	0	0
maker-Pl09-exonerate_protein2genome-gene-44.51	Pl09	44463917	44464096	Forward	NF	NF	0	0	0
maker-Pl09-exonerate_protein2genome-gene-46.10	Pl09	45946372	45946758	Forward	Pl09G0000337500.v1	Pl09	39115394	39115993	72.5
maker-Pl09-exonerate_protein2genome-gene-46.198	Pl09	47348064	47348332	Forward	NF	NF	0	0	0
maker-Pl09-exonerate_protein2genome-gene-46.251	Pl09	45938996	45940515	Reverse	NF	NF	0	0	0
maker-Pl09-exonerate_protein2genome-gene-46.420	Pl09	47336306	47337074	Reverse	NF	NF	0	0	0
maker-Pl09-exonerate_protein2genome-gene-5.39	Pl09	5325293	5326291	Forward	Pl09G0000065600.v1	Pl09	5213469	5213999	39.12
maker-Pl09-exonerate_protein2genome-gene-6.13	Pl09	6031834	6034258	Forward	Pl09G0000072800.v1	Pl09	5908708	5911106	98.54
maker-Pl09-exonerate_protein2genome-gene-9.15	Pl09	9030415	9030627	Forward	NF	NF	0	0	0
maker-Pl09-exonerate_protein2genome-gene-9.24	Pl09	9194791	9195294	Forward	NF	NF	0	0	0
maker-Pl09-exonerate_protein2genome-gene-9.71	Pl09	9089492	9090862	Reverse	NF	NF	0	0	0
maker-Pl10-exonerate_protein2genome-gene-1.172	Pl10	1786421	1786645	Reverse	NF	NF	0	0	0
maker-Pl10-exonerate_protein2genome-gene-13.1	Pl10	12923049	12924056	Forward	NF	NF	0	0	0
maker-Pl10-exonerate_protein2genome-gene-13.21	Pl10	13698366	13698999	Forward	NF	NF	0	0	0
maker-Pl10-exonerate_protein2genome-gene-14.35	Pl10	14702462	14702770	Reverse	NF	NF	0	0	0
maker-Pl10-exonerate_protein2genome-gene-1.75	Pl10	1786666	1787399	Forward	NF	NF	0	0	0
maker-Pl10-exonerate_protein2genome-gene-18.2	Pl10	18264214	18264547	Forward	NF	NF	0	0	0
maker-Pl10-exonerate_protein2genome-gene-25.18	Pl10	25501523	25502216	Forward	NF	NF	0	0	0
maker-Pl10-exonerate_protein2genome-gene-25.5	Pl10	25083131	25083349	Forward	NF	NF	0	0	0
maker-Pl10-exonerate_protein2genome-gene-25.57	Pl10	25590523	25590684	Reverse	NF	NF	0	0	0
maker-Pl10-exonerate_protein2genome-gene-25.58	Pl10	25626619	25626801	Reverse	NF	NF	0	0	0
maker-Pl10-exonerate_protein2genome-gene-29.18	Pl10	29749641	29750537	Reverse	NF	NF	0	0	0
maker-Pl10-exonerate_protein2genome-gene-30.26	Pl10	30396966	30397818	Forward	NF	NF	0	0	0
maker-Pl10-exonerate_protein2genome-gene-30.40	Pl10	30710510	30710815	Forward	NF	NF	0	0	0
maker-Pl10-exonerate_protein2genome-gene-3.1	Pl10	2890710	2891791	Forward	NF	NF	0	0	0
maker-Pl10-exonerate_protein2genome-gene-3.105	Pl10	3365870	3366040	Reverse	NF	NF	0	0	0
maker-Pl10-exonerate_protein2genome-gene-31.18	Pl10	31270300	31271125	Reverse	NF	NF	0	0	0
maker-Pl10-exonerate_protein2genome-gene-33.33	Pl10	33123293	33126176	Reverse	Pl10G0000236000.v1	Pl10	40043290	40046173	98.88
maker-Pl10-exonerate_protein2genome-gene-33.50	Pl10	33119014	33119958	Reverse	Pl10G0000235900.v1	Pl10	40038869	40040708	91.92
maker-Pl10-exonerate_protein2genome-gene-35.29	Pl10	35530447	35530722	Forward	NF	NF	0	0	0
maker-Pl10-exonerate_protein2genome-gene-35.50	Pl10	34964112	34964303	Reverse	NF	NF	0	0	0
maker-Pl10-exonerate_protein2genome-gene-36.20	Pl10	36750481	36750744	Forward	NF	NF	0	0	0
maker-Pl10-exonerate_protein2genome-gene-37.107	Pl10	37308142	37310279	Reverse	NF	NF	0	0	0
maker-Pl10-exonerate_protein2genome-gene-37.113	Pl10	37306710	37306865	Reverse	NF	NF	0	0	0
maker-Pl10-exonerate_protein2genome-gene-37.138	Pl10	37768272	37768969	Reverse	NF	NF	0	0	0
maker-Pl10-exonerate_protein2genome-gene-37.3	Pl10	36932832	36933232	Forward	NF	NF	0	0	0
maker-Pl10-exonerate_protein2genome-gene-37.30	Pl10	37231701	37232323	Forward	NF	NF	0	0	0
maker-Pl10-exonerate_protein2genome-gene-37.34	Pl10	37313869	37315041	Forward	Pl10G0000294700.v1	Pl10	47748175	47750063	63.14
maker-Pl10-exonerate_protein2genome-gene-37.38	Pl10	37315806	37316030	Forward	NF	NF	0	0	0
maker-Pl10-exonerate_protein2genome-gene-37.97	Pl10	37231405	37231638	Reverse	NF	NF	0	0	0
maker-Pl10-exonerate_protein2genome-gene-39.100	Pl10	39197310	39197868	Reverse	NF	NF	0	0	0
maker-Pl10-exonerate_protein2genome-gene-39.141	Pl10	39580952	39581137	Reverse	Pl10G0000280800.v1	Pl10	46270096	46270281	100
maker-Pl10-exonerate_protein2genome-gene-39.157	Pl10	39650744	39651124	Reverse	NF	NF	0	0	0
maker-Pl10-exonerate_protein2genome-gene-39.35	Pl10	39196154	39196420	Forward	NF	NF	0	0	0
maker-Pl10-exonerate_protein2genome-gene-41.127	Pl10	41034356	41034637	Reverse	NF	NF	0	0	0
maker-Pl10-exonerate_protein2genome-gene-41.36	Pl10	41226085	41226738	Forward	NF	NF	0	0	0
maker-Pl10-exonerate_protein2genome-gene-43.4	Pl10	43001981	43002714	Forward	NF	NF	0	0	0
maker-Pl10-exonerate_protein2genome-gene-46.479	Pl10	47690358	47691484	Reverse	NF	NF	0	0	0
maker-Pl10-exonerate_protein2genome-gene-6.124	Pl10	6684398	6685529	Reverse	NF	NF	0	0	0
maker-Pl10-exonerate_protein2genome-gene-6.46	Pl10	6272546	6273603	Forward	NF	NF	0	0	0
maker-Pl10-exonerate_protein2genome-gene-7.116	Pl10	7660635	7661002	Reverse	NF	NF	0	0	0
maker-Pl10-exonerate_protein2genome-gene-7.93	Pl10	7205077	7205979	Reverse	Pl10G0000058800.v1	Pl10	6595636	6597452	100
maker-Pl11-exonerate_protein2genome-gene-10.116	Pl11	10466684	10467981	Reverse	NF	NF	0	0	0
maker-Pl11-exonerate_protein2genome-gene-10.33	Pl11	10468061	10468544	Forward	NF	NF	0	0	0
maker-Pl11-exonerate_protein2genome-gene-10.84	Pl11	9998302	9998565	Reverse	NF	NF	0	0	0
maker-Pl11-exonerate_protein2genome-gene-11.54	Pl11	10957379	10957772	Reverse	NF	NF	0	0	0
maker-Pl11-exonerate_protein2genome-gene-13.26	Pl11	13704157	13705187	Forward	NF	NF	0	0	0
maker-Pl11-exonerate_protein2genome-gene-13.46	Pl11	13095395	13095574	Reverse	NF	NF	0	0	0
maker-Pl11-exonerate_protein2genome-gene-14.31	Pl11	13852164	13852334	Reverse	NF	NF	0	0	0
maker-Pl11-exonerate_protein2genome-gene-17.6	Pl11	17099967	17100556	Forward	NF	NF	0	0	0
maker-Pl11-exonerate_protein2genome-gene-22.0	Pl11	22170458	22170679	Forward	NF	NF	0	0	0
maker-Pl11-exonerate_protein2genome-gene-23.18	Pl11	23685938	23686616	Forward	NF	NF	0	0	0
maker-Pl11-exonerate_protein2genome-gene-23.31	Pl11	22922747	22922950	Reverse	NF	NF	0	0	0
maker-Pl11-exonerate_protein2genome-gene-29.30	Pl11	29021125	29021663	Reverse	NF	NF	0	0	0
maker-Pl11-exonerate_protein2genome-gene-30.2	Pl11	29928676	29928943	Forward	NF	NF	0	0	0
maker-Pl11-exonerate_protein2genome-gene-30.45	Pl11	29928168	29928612	Reverse	NF	NF	0	0	0
maker-Pl11-exonerate_protein2genome-gene-3.147	Pl11	3871812	3874673	Forward	NF	NF	0	0	0
maker-Pl11-exonerate_protein2genome-gene-32.114	Pl11	32812962	32813944	Reverse	NF	NF	0	0	0
maker-Pl11-exonerate_protein2genome-gene-33.53	Pl11	33361307	33361609	Reverse	NF	NF	0	0	0
maker-Pl11-exonerate_protein2genome-gene-34.58	Pl11	34656285	34657062	Forward	NF	NF	0	0	0
maker-Pl11-exonerate_protein2genome-gene-34.84	Pl11	34288925	34289477	Reverse	NF	NF	0	0	0
maker-Pl11-exonerate_protein2genome-gene-36.0	Pl11	35872231	35873039	Forward	NF	NF	0	0	0
maker-Pl11-exonerate_protein2genome-gene-36.64	Pl11	35965329	35965895	Reverse	NF	NF	0	0	0
maker-Pl11-exonerate_protein2genome-gene-3.77	Pl11	3315361	3316227	Forward	NF	NF	0	0	0
maker-Pl11-exonerate_protein2genome-gene-37.78	Pl11	36963781	36964029	Reverse	NF	NF	0	0	0
maker-Pl11-exonerate_protein2genome-gene-38.96	Pl11	38645754	38646882	Reverse	NF	NF	0	0	0
maker-Pl11-exonerate_protein2genome-gene-39.122	Pl11	39577199	39578502	Reverse	NF	NF	0	0	0
maker-Pl11-exonerate_protein2genome-gene-39.132	Pl11	39727006	39728276	Reverse	NF	NF	0	0	0
maker-Pl11-exonerate_protein2genome-gene-40.103	Pl11	40008613	40010151	Reverse	NF	NF	0	0	0
maker-Pl11-exonerate_protein2genome-gene-40.52	Pl11	40420932	40422193	Forward	NF	NF	0	0	0
maker-Pl11-exonerate_protein2genome-gene-42.151	Pl11	42326803	42327463	Reverse	NF	NF	0	0	0
maker-Pl11-exonerate_protein2genome-gene-43.205	Pl11	43052737	43053078	Reverse	NF	NF	0	0	0
maker-Pl11-exonerate_protein2genome-gene-43.275	Pl11	43221032	43221211	Reverse	NF	NF	0	0	0
maker-Pl11-exonerate_protein2genome-gene-43.8	Pl11	42953189	42953633	Forward	NF	NF	0	0	0
maker-Pl11-exonerate_protein2genome-gene-5.178	Pl11	5274768	5275579	Reverse	NF	NF	0	0	0
maker-Pl11-exonerate_protein2genome-gene-6.111	Pl11	5953956	5955163	Reverse	NF	NF	0	0	0
maker-Pl11-exonerate_protein2genome-gene-6.164	Pl11	6339424	6339702	Reverse	NF	NF	0	0	0
maker-Pl11-exonerate_protein2genome-gene-6.34	Pl11	6340070	6340282	Forward	NF	NF	0	0	0
maker-Pl11-exonerate_protein2genome-gene-8.70	Pl11	8041503	8041747	Reverse	NF	NF	0	0	0
maker-Pl11-exonerate_protein2genome-gene-8.72	Pl11	8040747	8040947	Reverse	NF	NF	0	0	0
maker-ptg000006l-exonerate_protein2genome-gene-0.9	ptg000006l	427486	427896	Reverse	NF	NF	0	0	0
maker-ptg000074l-exonerate_protein2genome-gene-0.1	ptg000074l	40455	40685	Forward	NF	NF	0	0	0
maker-ptg000075l-exonerate_protein2genome-gene-0.13	ptg000075l	235628	235798	Reverse	NF	NF	0	0	0
maker-ptg000124l-exonerate_protein2genome-gene-2.1	ptg000124l	2412212	2412382	Forward	NF	NF	0	0	0
maker-ptg000132l-exonerate_protein2genome-gene-0.15	ptg000132l	342278	343090	Forward	NF	NF	0	0	0
maker-ptg000140l-exonerate_protein2genome-gene-0.50	ptg000140l	498867	499461	Reverse	NF	NF	0	0	0
maker-ptg000144l-exonerate_protein2genome-gene-0.5	ptg000144l	729411	729584	Forward	NF	NF	0	0	0

## Sheet: SupplTable7_GenesAgricultural
Gene	Trait	Reported in species	Gene ID P. lunatus	Chr	Start	End	Strand	Gene ID P. lunatus andean	Chr	Start	End	Strand	Similarity	GeneID v2.1 P. vulgaris	Chr	Gene Start	Gene End	Strand	Similarity	Reference
ALC	Pod shattering	Arabidopsis	Pl01G0000026100.v1	Pl01	2015530	2019041	Reverse	maker-Pl01-exonerate_protein2genome-gene-2.114	Pl01	2050876	2053936	Reverse	100	Phvul.001G023200.v2.1	Chr01	1931951	1935673	Reverse	82.37	Dardick et al., 201; Ogutcen et al., 2018
MYB56	Flowering time	Common bean	Pl01G0000079800.v1	Pl01	7737015	7738854	Reverse	maker-Pl01-exonerate_protein2genome-gene-8.84	Pl01	8194233	8196075	Reverse	94.53	Phvul.001G064600.v2.1	Chr01	7904199	7906045	Reverse	26.46	Moghaddam et al., 2016
KNUCKELS (KNU)	Determinate growth habit	Common bean	Pl01G0000114500.v1	Pl01	12152524	12153036	Reverse	maker-Pl01-exonerate_protein2genome-gene-13.58	Pl01	12912350	12912856	Reverse	84.89	Phvul.001G087900.v2.1	Chr01	13759455	13759985	Reverse	73.1	Moghaddam et al., 2016
BRG-1	Flowering time	Common bean	Pl01G0000140900.v1	Pl01	15827691	15830156	Reverse	maker-Pl01-exonerate_protein2genome-gene-18.58	Pl01	18001008	18002354	Reverse	82.62	Phvul.001G094300.v2.1	Chr01	16831121	16833532	Reverse	90.23	Moghaddam et al., 2016
fin, PvTFL1	Flowering time	Common bean	Pl01G0000340500.v1	Pl01	40953468	40954638	Reverse	maker-Pl01-exonerate_protein2genome-gene-35.171	Pl01	35592167	35593377	Reverse	84.57	Phvul.001G189200.v2.1	Chr01	44856139	44857862	Reverse	84.81	Campa et al., 2018; Repinski et al., 2012
LWD1	Flowering time	Common bean	Pl01G0000343500.v1	Pl01	41227109	41228307	Reverse	maker-Pl01-exonerate_protein2genome-gene-35.205	Pl01	35845481	35846515	Reverse	92.58	Phvul.001G192200.v2.1	Chr01	45102438	45105316	Reverse	87.33	Moghaddam et al., 2016
SPINDLY	Flowering time	Common bean	Pl01G0000343700.v1	Pl01	41234294	41261155	Forward	maker-Pl01-exonerate_protein2genome-gene-36.3	Pl01	35852977	35867732	Forward	64.82	Phvul.001G192300.v2.1	Chr01	45111753	45133823	Forward	93.1	Moghaddam et al., 2016
SPINDLY	Flowering time	Common bean	Pl01G0000343700.v1	Pl01	41234294	41261155	Forward	maker-Pl01-exonerate_protein2genome-gene-36.0	Pl01	35882732	35908428	Forward	96.14	Phvul.001G192300.v2.1	Chr01	45111753	45133823	Forward	93.1	Moghaddam et al., 2016
Raffinose	Raffinose content	Common bean	Pl01G0000366100.v1	Pl01	43124090	43128122	Forward	maker-Pl01-exonerate_protein2genome-gene-37.101	Pl01	37796864	37799785	Forward	96.7	Phvul.001G214300.v2.1	Chr01	47048689	47052441	Forward	82.72	McPhee et al., 2002
IND	Pod shattering	Common bean	Pl02G0000404800.v1	Pl02	46429734	46431544	Reverse	maker-Pl02-exonerate_protein2genome-gene-52.67	Pl02	52312234	52313079	Forward	97.49	Phvul.002G271000.v2.1	Chr02	44186987	44188326	Forward	86.02	Parker et al., 2022
IND	Pod shattering	Common bean	Pl02G0000404800.v1	Pl02	46429734	46431544	Reverse	maker-Pl02-exonerate_protein2genome-gene-52.219	Pl02	52358419	52359264	Reverse	97.49	Phvul.002G271000.v2.1	Chr02	44186987	44188326	Forward	86.02	Parker et al., 2022
IND	Pod shattering	Common bean	Pl02G0000404800.v1	Pl02	46429734	46431544	Reverse	maker-Pl02-exonerate_protein2genome-gene-52.68	Pl02	52366875	52367720	Forward	97.49	Phvul.002G271000.v2.1	Chr02	44186987	44188326	Forward	86.02	Parker et al., 2022
ACC Synthase (ACS6)	Ethylene biosynthesis	Mung bean	Pl02G0000428600.v1	Pl02	48424998	48428120	Reverse	maker-Pl02-exonerate_protein2genome-gene-54.218	Pl02	54396990	54399209	Reverse	100	Phvul.002G293000.v2.1	Chr02	46198013	46200851	Reverse	86.61	Song et al., 2005
PDH1	Pod shattering	Common bean	Pl03G0000340600.v1	Pl03	40268335	40269441	Forward	maker-Pl03-exonerate_protein2genome-gene-38.80	Pl03	38893319	38893870	Forward	100	Phvul.003G252100.v2.1	Chr03	49124934	49125774	Forward	72.24	Parker et al. 2020
ATMY B118	Days to maturity	Common bean	Pl04G0000011400.v1	Pl04	909826	913860	Reverse	maker-Pl04-exonerate_protein2genome-gene-0.205	Pl04	864142	866605	Reverse	87.05	Phvul.004G011400.v2.1	Chr04	1942183	1944366	Reverse	33.15	Moghaddam et al., 2016
ABCB19	Plant architecture	Common bean	Pl04G0000029100.v1	Pl04	2540478	2551683	Reverse	maker-Pl04-exonerate_protein2genome-gene-2.163	Pl04	2412539	2423025	Reverse	100	Phvul.004G027800.v2.1	Chr04	3197147	3208281	Reverse	97.78	Moghaddam et al., 2016
GIGANTEA	Seed size	Common bean	Pl04G0000200500.v1	Pl04	27288872	27321159	Forward	maker-Pl04-exonerate_protein2genome-gene-32.0	Pl04	31900196	31936243	Forward	97.7	Phvul.004G088300.v2.1	Chr04	14679772	14697707	Reverse	86.91	Koinange et al 1996 ; Park et al 1999 ; Kwak et al 2008
DREB1A	Drought tolerance	Common bean	Pl04G0000312600.v1	Pl04	43610337	43611011	Forward	maker-Pl04-exonerate_protein2genome-gene-45.87	Pl04	45867601	45868275	Forward	80.96	Phvul.004G122000.v2.1	Chr04	41387094	41388329	Forward	79.84	Konzen et al., 2019
BetaGlucosidase (HCN-BG)	HCN biosynthesis	White clover / Lima bean	Pl05G0000263800.v1	Pl05	35407398	35410281	Reverse	maker-Pl05-exonerate_protein2genome-gene-40.119	Pl05	39925852	39928736	Reverse	89.39	Phvul.005G151300.v2.1	Chr05	38148945	38151839	Reverse	57.77	Oxtoby et al., 1991 ; Cuny et al., 2019 ; Lai et al., 2020
CPY79D72	HCN biosynthesis	Lima bean	Pl06G0000006800.v1	Pl06	864844	868358	Reverse	maker-Pl06-exonerate_protein2genome-gene-0.91	Pl06	837928	841392	Reverse	94.66	Phvul.006G002300.v2.1	Chr06	696767	698504	Reverse	53.14	Lai et al., 2020
CPY79D72	HCN biosynthesis	Lima bean	Pl06G0000007700.v1	Pl06	1026431	1028235	Reverse	maker-Pl06-exonerate_protein2genome-gene-0.91	Pl06	837928	841392	Reverse	93.89	Phvul.006G002300.v2.1	Chr06	696767	698504	Reverse	53.38	Lai et al., 2020
UTG85K31	HCN biosynthesis	Lima bean	Pl06G0000090100.v1	Pl06	13583055	13585551	Forward	Not found	NF	0	0	NF	0	Phvul.006G017500.v2.1	Chr06	4804136	4806473	Reverse	47.29	Lai et al., 2020
UGT85K31	HCN biosynthesis	Common bean	Pl06G0000093600.v1	Pl06	14063476	14065837	Forward	Not found	NF	0	0	NF	0	Phvul.006G017500.v2.1	Chr06	4804136	4806473	Reverse	64.21	Lai et al., 2020
ASN1	Seed weight	Common bean	Pl06G0000180000.v1	Pl06	23235483	23240293	Reverse	maker-Pl06-exonerate_protein2genome-gene-24.164	Pl06	24430095	24434333	Reverse	100	Phvul.006G069300.v2.1	Chr06	18114352	18118758	Reverse	94.48	Moghaddam et al., 2016
100 seed weight	100 seed weight	Common bean	Pl06G0000187600.v1	Pl06	23977173	23979091	Forward	maker-Pl06-exonerate_protein2genome-gene-25.29	Pl06	25150752	25152058	Forward	91.69	Phvul.006G075400.v2.1	Chr06	18777382	18779796	Forward	63.51	Johnson et al. 2002
100 seed weight	100 seed weight	Common bean	Pl06G0000187700.v1	Pl06	23981615	23984678	Forward	maker-Pl06-exonerate_protein2genome-gene-25.30	Pl06	25155000	25157465	Forward	97.89	Phvul.006G075500.v2.1	Chr06	18783242	18786125	Forward	96.25	Johnson et al. 2002
CYP79A2	HCN biosynthesis	Lima bean	Pl06G0000191400.v1	Pl06	24282469	24284421	Forward	maker-Pl06-exonerate_protein2genome-gene-25.70	Pl06	25444389	25457850	Forward	83.59	Phvul.006G078900.v2.1	Chr06	19068725	19070752	Forward	80.45	Boter et al., 2024
CYP79A2	HCN biosynthesis	Lima bean	Pl06G0000191700.v1	Pl06	24310506	24312461	Forward	maker-Pl06-exonerate_protein2genome-gene-25.76	Pl06	25479628	25481594	Forward	80.33	Phvul.006G079100.v2.1	Chr06	19092672	19094730	Forward	64.82	Boter et al., 2024
SHP	Pod shattering	Arabidopsis	Pl06G0000289300.v1	Pl06	32571244	32579082	Reverse	maker-Pl06-exonerate_protein2genome-gene-33.207	Pl06	33686918	33694362	Reverse	97.31	Phvul.006G169600.v2.1	Chr06	27307945	27315783	Reverse	100	Liljegren et al., 2000
AHAS	Herbicide resistance	Chickpea	Pl06G0000308200.v1	Pl06	34119282	34121228	Forward	maker-Pl06-exonerate_protein2genome-gene-35.39	Pl06	35333129	35334091	Forward	41.14	Phvul.006G187400.v2.1	Chr06	28793937	28796249	Forward	85.73	Thompson & Tar’an 2014
SAC51	Plant architecture	Common bean	Pl06G0000325100.v1	Pl06	35278329	35279950	Forward	maker-Pl06-exonerate_protein2genome-gene-36.79	Pl06	36478372	36479990	Forward	93.25	Phvul.006G203400.v2.1	Chr06	29922301	29925908	Forward	65.14	Moghaddam et al., 2016
Invertase-pectin methylesterase inhibitor	Plant architecture	Common bean	Pl07G0000250500.v1	Pl07	32118364	32120437	Reverse	maker-Pl07-exonerate_protein2genome-gene-36.70	Pl07	36013435	36015506	Reverse	93.12	Phvul.007G246700.v2.1	Chr07	34124332	34126526	Forward	82.89	Moghaddam et al., 2016
SWINGER	Flowering time	Common bean	Pl07G0000258000.v1	Pl07	33045591	33059819	Reverse	maker-Pl07-exonerate_protein2genome-gene-37.71	Pl07	37004498	37017933	Reverse	95.31	Phvul.007G213900.v2.1	Chr07	33653294	33664344	Forward	83.93	Moghaddam et al., 2016
P Locus	Seed coat color	Common bean	Pl07G0000312000.v1	Pl07	39093568	39106935	Reverse	Not found	NF	0	0	NF	0	Phvul.007G171333.v2.1	Chr07	28752132	28766155	Forward	90.86	Johnson et al. 2002, Moghaddam et al., 2016
SAR1	Plant architecture	Common bean	Pl07G0000337800.v1	Pl07	41584450	41610988	Forward	maker-Pl07-exonerate_protein2genome-gene-45.95	Pl07	45537346	45563945	Forward	98.76	Phvul.007G218900.v2.1	Chr07	34184152	34210187	Forward	86.66	Moghaddam et al., 2016
SBT1.1	Seed weight	Common bean	Pl08G0000015800.v1	Pl08	1305046	1307894	Forward	maker-Pl08-exonerate_protein2genome-gene-1.67	Pl08	1550303	1552630	Forward	95.82	Phvul.008G013300.v2.1	Chr08	1090400	1093853	Forward	83.96	Moghaddam et al., 2016
FUL	Pod shattering	Arabidopsis	Pl09G0000292600.v1	Pl09	34368138	34377563	Forward	maker-Pl09-exonerate_protein2genome-gene-41.21	Pl09	41017775	41026541	Forward	100	Phvul.009G203400.v2.1	Chr09	30856875	30865960	Forward	84.93	Ferrándiz et al 2000 ; Liljegren et al., 2000
AMY1	Seed weight	Common bean	Pl10G0000050200.v1	Pl10	5457197	5460169	Reverse	maker-Pl10-exonerate_protein2genome-gene-6.74	Pl10	5919209	5921490	Reverse	94.09	Phvul.010G017600.v2.1	Chr10	2604076	2606630	Forward	89.51	Moghaddam et al., 2016
CYP79D71	HCN biosynthesis	Common bean	Pl10G0000255200.v1	Pl10	42823184	42825997	Forward	maker-Pl10-exonerate_protein2genome-gene-36.34	Pl10	36648072	36650582	Reverse	61.56	Phvul.010G076800.v2.1	Chr10	19087109	19089486	Reverse	77.22	Lai et al., 2020
CPY79D71	HCN biosynthesis	Lima bean	Pl10G0000258900.v1	Pl10	43369229	43372055	Reverse	maker-Pl10-exonerate_protein2genome-gene-36.34	Pl10	36648072	36650582	Reverse	92.25	Phvul.010G076800.v2.1	Chr10	19087109	19089486	Reverse	56.42	Lai et al., 2020
CYP83E47	HCN biosynthesis	Lima bean	Pl10G0000260500.v1	Pl10	43622272	43625390	Forward	maker-Pl10-exonerate_protein2genome-gene-37.6	Pl10	36970372	36972987	Forward	74.66	Phvul.010G076700.v2.1	Chr10	18976778	18979469	Reverse	44.53	Lai et al., 2020
NST	Pod shattering	Arabidopsis	Pl10G0000310600.v1	Pl10	49682381	49685027	Reverse	maker-Pl10-exonerate_protein2genome-gene-43.104	Pl10	43334062	43335888	Reverse	98.08	Phvul.010G118700.v2.1	Chr10	39859044	39861195	Reverse	94.69	Mitsuda et al., 2008
TOR	Days to maturity	Common bean	Pl11G0000057300.v1	Pl11	4196720	4212106	Reverse	maker-Pl11-exonerate_protein2genome-gene-4.139	Pl11	4141291	4156715	Reverse	97.97	Phvul.011G050300.v2.1	Chr11	4464026	4480574	Reverse	90.15	Moghaddam et al., 2016
VRN1	Flowering time	Common bean	Pl11G0000057900.v1	Pl11	4250053	4251883	Reverse	maker-Pl11-exonerate_protein2genome-gene-4.144	Pl11	4184590	4186417	Reverse	100	Phvul.011G050800.v2.1	Chr11	4514690	4516667	Reverse	88.95	Moghaddam et al., 2016
FPA	Flowering time	Common bean	Pl11G0000060700.v1	Pl11	4433956	4440908	Forward	maker-Pl11-exonerate_protein2genome-gene-4.57	Pl11	4384219	4391039	Forward	96.95	Phvul.011G053300.v2.1	Chr11	4683152	4694741	Forward	82.3	Moghaddam et al., 2016
SHL	Flowering time	Common bean	Pl11G0000335200.v1	Pl11	41444832	41446940	Forward	maker-Pl11-exonerate_protein2genome-gene-38.10	Pl11	38145113	38147227	Forward	100	Phvul.011G158300.v2.1	Chr11	45087681	45092064	Forward	89.64	Moghaddam et al., 2016
SPL4	Plant architecture	Common bean	Pl11G0000342900.v1	Pl11	42499111	42500418	Forward	maker-Pl11-exonerate_protein2genome-gene-39.22	Pl11	39248213	39249234	Forward	44.35	Phvul.011G164800.v2.1	Chr11	46749842	46751202	Forward	35.74	Moghaddam et al., 2016
References
Campa A, Murube E, Ferreira JJ. (2018). Genetic Diversity, Population Structure, and Linkage Disequilibrium in a Spanish Common Bean Diversity Panel Revealed through Genotyping-by-Sequencing. Genes (Basel): 9, 518.
Johnson WC, and Gepts P. (2002). The role of epistasis in controlling seed yield and other agronomic traits in an Andean×Mesoamerican cross of common bean (Phaseolus vulgaris L.). Euphytica 125, 69–79.
Konzen ER, et al. (2019). DREB Genes from Common Bean (Phaseolus vulgaris L.) Show Broad to Specific Abiotic Stress Responses and Distinct Levels of Nucleotide Diversity. Int J Genomics: 9520642.
Mcphee K, Zemetra R, Brown J and Myers JR. (2002). Genetic Analysis of the Raffinose Family Oligosaccharides in Common Bean.” Journal of the American Society for Horticultural Science 127: 376-382
Moghaddam SM, et al. (2016). Genome-Wide Association Study Identifies Candidate Loci Underlying Agronomic Traits in a Middle American Diversity Panel of Common Bean. The Plant Genome 9, plantgenome2016.2002.0012.
Parker TA, Berny Mier y Teran JC, Palkovic A, Jernstedt J, Gepts P (2020). Pod indehiscence is a domestication and aridity resilience trait in common bean. New Phytologist 225:558-570
Repinski SL, Kwak M, Gepts P. (2012). The common bean growth habit gene PvTFL1y is a functional homolog of Arabidopsis TFL1. Theoretical and Applied Genetics 124: 1539-1547.
Song JD, Kim JH, Lee DH, Rhew TH, Cho SH, Lee CH. (2005). Developmental regulation of the expression of 1-aminocyclopropane-l-carboxylic acid (ACC) synthase and ACC oxidase genes in hypocotyls of etiolated mung bean seedlings. Plant Science 168:1149–1155
Thompson C, Tar’an B. (2014). Genetic characterization of the acetohydroxyacid synthase (AHAS) gene responsible for resistance to imidazolinone in chickpea (Cicer arietinum L.). Theoretical and Applied Genetics 127, 1583-1591.
Boter, M. & Diaz, I. Contrasting defence mechanisms against spider mite infestation in cyanogenic and non-cyanogenic legumes. Plant Science 345, 112118, (2024).
Ogutcen, E., Pandey, A., Khan, M., Marques, E., Penmetsa, R., Kahraman, A., & von Wettberg, E. (2018). Pod Shattering: A Homologous Series of Variation Underlying Domestication and an Avenue for Crop Improvement. Agronomy, 8(8), 137.
Dardick, C. & Callahan, A.M., (2014). Evolution of the fruit endocarp: molecular mechanisms underlying adaptations in seed protection and dispersal strategies. Frontiers in Plant Science, 5(June), pp.1–10.
Park DH, Somers DE, Kim YS, Choy YH, Lim HK, Soh MS, Kim HJ, Kay SA, Nam HG. 1999. Control of circadian rhythms and photoperiodic flowering by the Arabidopsis GIGANTEA Gene. Science. 285:1579–1582
Myounghai Kwak, Dianne Velasco, Paul Gepts, Mapping Homologous Sequences for Determinacy and Photoperiod Sensitivity in Common Bean (Phaseolus vulgaris), Journal of Heredity, Volume 99, Issue 3, May 2008, Pages 283–291, https://doi.org/10.1093/jhered/esn005
Ferrándiz C, Liljegren SJ, Yanofsky MF (2000) Negative regulation of the SHATTERPROOF genes by FRUITFULL during arabidopsis fruit development. Science 289:436–438
Koinange EMK, Singh SP, Gepts P (1996) Genetic control of the domestication syndrome in common bean. Crop Sci 36:1037–1045
Mitsuda, Nobutaka ; Ohme-Takagi, Masaru: NAC transcription factors NST1 and NST3 regulate pod shattering in a partially redundant manner by promoting secondary wall formation after the establishment of tissue identity. The Plant Journal 56 (2008),Nr. 5, S. 768–778
Liljegren, Sarah J. ; Ditta, Gary S. ; Eshed, Yuval ; Savidge, Beth ; Bowman, John L.; Yanofsky, Martin F.: SHATTERPROOF MADS-box genes control seed dispersal in Arabidopsis. Nature 404 (2000), Nr. 6779, S. 766
Mitsuda, Nobutaka ; Ohme-Takagi, Masaru: NAC transcription factors NST1 and NST3 regulate pod shattering in a partially redundant manner by promoting secondary wall formation after the establishment of tissue identity. The Plant Journal 56 (2008),Nr. 5, S. 768–778
Oxtoby, E., Dunn, M.A., Pancoro, A., and Hughes, M.A. (1991). Nucleotide and derived amino acid sequence of the cyanogenic β-glucosidase (linamarase) from white clover (Trifolium repens L.). Plant Molecular Biology 17, 209-219.
Cuny, M. A., La Forgia, D., Desurmont, G. A., Glauser, G., & Benrey, B. (2019). Role of cyanogenic glycosides in the seeds of wild lima bean, Phaseolus lunatus: defense, plant nutrition or both?. Planta, 250(4), 1281-1292.

## Sheet: SupplTable8_StatsGEMS
Genome	Tool	Database	Metabolites	Reactions	Enzymes
P. vulgaris	Pathway tools	CommonBeanCyc	3099	3157	5481
P. vulgaris	RAVEN	KEGG	2982	3022	3862
P. lunatus Mesoamerican	RAVEN	KEGG	2969	2997	3198
P. lunatus Andean	RAVEN	KEGG	2959	2974	2586
P. acutifolius domesticated	RAVEN	KEGG	2977	3016	4680

## Sheet: SupplTable9_P-valuesGroupCompar
	Alkaloids	Aminoacids	Carbohydrates	Cofactors	Energy	Flavonoids	Glycan	Lipids	Nucleotides	OtherAminoacids	Secondary	Terpenoids	Xenobiotics
Alkaloids	1	4.6672e-09	6.06735e-10	1.49873e-05	1.21061e-14	0.117807	1.26266e-07	2.1343e-05	1.14947e-13	2.79997e-06	0.0815266	0.0419883	1.3291e-05
Aminoacids	4.6672e-09	1	0.702137	0.0273723	0.00212331	0.000161247	0.119845	0.0220456	0.00208635	0.534108	6.22783e-08	8.97319e-06	0.295693
Carbohydrates	6.06735e-10	0.702137	1	0.00832523	0.00550413	3.07583e-05	0.162291	0.00646346	0.00541467	0.355327	4.17293e-09	1.27478e-06	0.155659
Cofactors	1.49873e-05	0.0273723	0.00832523	1	8.59669e-07	0.0164386	0.00248408	0.96339	2.09484e-06	0.24636	0.00120727	0.011243	0.543919
Energy	1.21061e-14	0.00212331	0.00550413	8.59669e-07	1	3.58763e-09	0.604892	7.73391e-07	0.624196	0.00141686	5.83112e-14	2.89667e-11	0.000327045
Flavonoids	0.117807	0.000161247	3.07583e-05	0.0164386	3.58763e-09	1	4.03951e-05	0.0234604	2.36861e-09	0.00288049	0.984174	0.745597	0.0103075
Glycan	1.26266e-07	0.119845	0.162291	0.00248408	0.604892	4.03951e-05	1	0.00350943	0.417384	0.0670516	2.07917e-06	1.46131e-05	0.0292114
Lipids	2.1343e-05	0.0220456	0.00646346	0.96339	7.73391e-07	0.0234604	0.00350943	1	2.9483e-06	0.227615	0.00132097	0.0132175	0.496125
Nucleotides	1.14947e-13	0.00208635	0.00541467	2.09484e-06	0.624196	2.36861e-09	0.417384	2.9483e-06	1	0.000950582	6.22122e-12	2.75108e-10	0.000146686
OtherAminoacids	2.79997e-06	0.534108	0.355327	0.24636	0.00141686	0.00288049	0.0670516	0.227615	0.000950582	1	0.000136692	0.00141977	0.677699
Secondary	0.0815266	6.22783e-08	4.17293e-09	0.00120727	5.83112e-14	0.984174	2.07917e-06	0.00132097	6.22122e-12	0.000136692	1	0.644103	0.00118152
Terpenoids	0.0419883	8.97319e-06	1.27478e-06	0.011243	2.89667e-11	0.745597	1.46131e-05	0.0132175	2.75108e-10	0.00141977	0.644103	1	0.00709704
Xenobiotics	1.3291e-05	0.295693	0.155659	0.543919	0.000327045	0.0103075	0.0292114	0.496125	0.000146686	0.677699	0.00118152	0.00709704	1

## Sheet: SupplTable10_HCNPvulgaris
Enzyme information								Expression data (TPM)
								SRR1024145	SRR1025259	SRR1025260	SRR1025261	SRR1025262	SRR1025263	SRR1025264	SRR1025265	SRR1025266	SRR1025267	SRR1025268	SRR1025269	SRR1025278	SRR1025279	SRR1025280	SRR1025281	SRR1025282	SRR1025283	SRR1025284	SRR1025285	SRR1025286	SRR1025287	SRR1025288	SRR1025289	SRR1025290	SRR1025291	SRR1025292	SRR1025293	SRR1025294	SRR1025295	SRR1025300	SRR1025301	SRR1025302	SRR1025303	SRR1025304	SRR1025305	SRR1025306	SRR1025307	SRR1025309	SRR1025310	SRR1025313	SRR1025314
Group	Reaction	Transcript ID	Gene ID	Chr	Start	End	Strand	Embryo+Cotyledons	Embryo+Cotyledons	Hypocotyl	Hypocotyl	Radicle	Radicle	Cotyledons	Cotyledons	Hypocotyl	Hypocotyl	Primaryleaf	Primaryleaf	Epicotyl	Epicotyl	Primaryroot	Primaryroot	Firsttrifoliateleaf	Firsttrifoliateleaf	Hypocotyl	Hypocotyl	Primaryleaf	Primaryleaf	Root	Neckoftheroot	Trifoliateleaf	Trifoliateleaf	Root	Root	Stem	Trifoliateleaf	Hypocotyl	Hypocotyl	Root	Trifoliateleaf	Trifoliateleaf	Stemnode	Stem	Stem	Axialmeristem	Axialmeristem	Trifoliateleaf	Trifoliateleaf
1	R10031	Phvul.006G002300.2.p	Phvul.006G002300.v2.1	Chr06	696767	698504	Reverse	0	0	0	0	0	0	0	0	0.059057	0	0	0	0.361905	0	0	0	6.91057	0.114745	0.117755	0	0.093769	0	0	0.19015	0	0	0	0	0	0.500655	0.076309	0.052378	0	0	0.298996	0.317133	0.433856	0.506353	0.318061	0.057339	0.034355	0
1	R10031	Phvul.006G078800.1.p	Phvul.006G078800.v2.1	Chr06	19056255	19058210	Forward	0	0	0.903969	0.463181	0	0	0.980731	0.56338	0	0	0	0	0.068993	2.87127	0	0	0.142409	0.12906	0.138343	0	0	0	0	0	0	0.229147	0	0	0	0.083705	0.289993	0	24.2794	0	0	0	0.055387	0	0	0.133781	0.103456	0.082553
1	R10031	Phvul.006G078900.1.p	Phvul.006G078900.v2.1	Chr06	19068725	19070752	Forward	0.079787	0	0.157261	0	0	0	6.7789	4.94269	0.041995	0	0.099017	0	0.035986	0.308819	0	0	0.02866	0.358921	0	0	0	0	0	0	0	0	0	0	0	0.010754	0.060002	0	3.09196	0	0	0.034903	0	0	0.018393	0.012846	0.519056	0.528825
1	R10031	Phvul.006G079100.1.p	Phvul.006G079100.v2.1	Chr06	19092672	19094730	Forward	0	0	0.051563	0	0	0	0.401826	0.321899	0	0	0.010258	0.038788	0	0.123042	0	0	0.258583	0	0	0	0	0	0	0	0	0	0	0	0	0	0	0	1.2687	0	0	0	0	0	0	0.017576	0.052954	0.035844
1	R10031	Phvul.006G079200.2.p	Phvul.006G079200.v2.1	Chr06	19104464	19107947	Forward	0.24725	0.206268	3.75927	1.75412	1.37513	0.525605	0	0	1.97238	2.05307	0.027154	0	0.355453	0.572603	0.019229	0	0.966725	0	0	0	0	0	0	0.260274	0	0	0	0	0	0	0	0	0	0	0	0.193273	0.375701	0.110238	0.17629	0	0	0
1	R10031	Phvul.010G076800.1.p	Phvul.010G076800.v2.1	Chr10	19087109	19089486	Reverse	0	0	0	0	0	0	0	0	0	0	0	0	0	0	0	0	0	0	0	0	0	0	0	0	0	0	0	0	0	0	0	0.02921	0	0	0	0	0	0	0	0	0	0
2	R11641	Phvul.001G008900.1.p	Phvul.001G008900.v2.1	Chr01	655552	657347	Forward	9.52576	5.88619	0.151645	0	2.92397	1.83613	9.26253	8.02201	16.3918	8.6537	18.0292	11.6546	8.23844	4.02013	40.3443	37.057	2.10024	3.43393	2.3567	2.05027	1.50029	1.81661	8.45687	0.273817	17.929	26.1745	41.1423	1.90908	3.36821	2.77526	12.7219	20.815	12.1132	2.8057	4.96246	3.25997	4.14811	2.18225	2.60007	45.1463	2.58398	1.49014
2	R11641	Phvul.001G052100.1.p	Phvul.001G052100.v2.1	Chr01	5695145	5699567	Reverse	0.50575	3.62291	10.4368	5.44011	18.81	15.1303	0	0	5.69921	4.50005	0.054727	0	0.219145	1.92097	2.72242	2.84161	1.72471	0	18.9902	9.71618	0	0	6.21395	0.043603	27.3477	32.4803	1.82394	0	24.199	0	7.07668	23.6315	0	0	0	0.298401	0	0.564976	0.926252	1.57732	0	0
2	R11641	Phvul.002G025000.1.p	Phvul.002G025000.v2.1	Chr02	2638982	2641406	Forward	0.174639	2.09018	0.464615	0.201588	8.6229	8.4736	1.50958	8.99958	3.47273	2.52198	1.21923	0.996573	13.3451	0.139039	12.1961	11.713	0.242178	0.27181	1.43254	0.579344	0.185215	0.029291	63.4382	0.017648	123.603	98.2967	325.906	12.4185	5.08082	0.040775	7.65279	1.89932	261.337	0.045992	0	2.64794	0.424529	0.345131	0.088104	3.45631	0.356818	0.365553
2	R11641	Phvul.002G025200.1.p	Phvul.002G025200.v2.1	Chr02	2665463	2667806	Forward	10.6319	6.87086	0.136955	0	2.83073	3.01184	1.09296	0.858144	0.209958	0.454865	0.307772	0.339873	0.216775	0.221937	1.46537	1.502	0.286281	0.103076	0.386921	0.41011	0	0.035598	22.097	0.476287	23.5502	17.9897	35.6042	3.54849	1.16482	0.098373	0.700804	0.498709	49.3129	0.245385	0	1.02519	0.104438	0.348213	0.755789	0.687188	0.298807	0.218803
2	R11641	Phvul.002G263700.1.p	Phvul.002G263700.v2.1	Chr02	43532992	43534968	Reverse	27.0825	11.9192	1.46654	1.0061	0.515439	0.236759	8.40509	8.09733	13.7418	10.922	6.92486	5.99331	7.20305	8.06704	7.99047	8.00296	4.54483	2.02318	15.0451	4.01682	3.66633	2.99767	1.28717	2.89296	1.9038	1.27233	4.66433	0.199551	18.102	7.07559	4.6723	13.9634	1.70013	11.4717	15.2131	9.39786	10.744	4.2361	4.87338	16.9241	8.25574	5.85415
2	R11641	Phvul.002G263900.1.p	Phvul.002G263900.v2.1	Chr02	43543263	43545426	Forward	6.16281	3.03179	1.4175	0.692439	0.389215	0.448139	0.536983	0.43797	2.02625	1.28061	1.62188	1.37766	1.63029	2.70574	1.20015	1.09693	6.17535	4.66711	2.33595	0.571044	2.45062	2.55513	0.144831	7.69164	0.473203	0.775663	0.298834	0	5.85326	1.82583	0.102047	1.84625	0.286789	15.52	12.4273	6.65626	9.00294	7.81574	11.7984	3.3502	30.7868	23.2551
2	R11641	Phvul.003G009200.1.p	Phvul.003G009200.v2.1	Chr03	1032893	1034863	Forward	0.449453	0.713672	0.404547	0.319943	1.79891	1.7066	0.767302	0.492514	0.81625	0.795019	1.50567	0.592224	0.691222	0.92012	2.10927	2.13402	0.971511	0.341628	0.610013	0.346186	0.124446	0.161535	9.25355	0.531183	8.20385	9.44508	15.0244	1.74869	1.01568	0.351765	1.38577	3.44382	12.0177	0.344574	0.218707	2.03577	1.36861	1.22413	2.90424	4.62843	1.33552	1.08742
2	R11641	Phvul.003G009300.1.p	Phvul.003G009300.v2.1	Chr03	1035108	1036969	Reverse	0	0	0	0	0	0	0	0	0	0	0.129114	0	0.12036	0.060838	0.073139	0.103275	0.087581	0	0	0	0.030402	0	0.07501	0.095898	0.305528	0.991273	0.41851	0.396108	0.043785	0.06241	0.045212	0.051342	0.376649	0.147249	0	0.117345	0	0.122005	0.655527	0.127233	0.250619	0.278265
2	R11641	Phvul.003G009500.1.p	Phvul.003G009500.v2.1	Chr03	1051164	1052871	Forward	34.3556	21.5533	2.98703	1.42718	2.4039	1.5801	4.3222	3.11585	3.7768	2.92984	7.26647	5.16057	3.12484	3.53506	5.0548	4.72242	4.97138	0.722348	6.62901	1.71103	1.49396	1.62665	9.69286	4.81585	2.35462	1.99663	5.97799	1.65028	2.48589	1.0311	0.740869	2.34052	2.57406	1.13326	0.653261	2.0139	0.367566	7.31589	8.31655	2.29684	4.5521	3.46628
2	R11641	Phvul.003G085302.1.p	Phvul.003G085302.v2.1	Chr03	14967806	14969537	Reverse	1.28986	1.1804	0.223491	0.157905	0.168939	0	1.65916	1.51354	0.326061	0.352504	0.140195	0.083877	0.165738	0.469851	0.431267	0.595615	0.099811	0.089129	0.166695	0.096844	0.12	0.055001	0.134143	0.038846	0	0	0.260099	0	0	0.087573	0.116771	0	0.407029	0.051084	0.046332	0.226747	0.056004	0.044133	0.101633	0.036631	0.023575	0.085142
2	R11641	Phvul.003G085400.1.p	Phvul.003G085400.v2.1	Chr03	16950726	16952504	Forward	0	0.113959	0.205669	0	0.265414	0.394899	0.236856	0.161965	0.674474	0.737732	0.359043	0.119179	0.117333	0.491856	0.558249	0.803147	0.042289	0.18779	1.44348	0.41057	0.084195	0.029939	1.79735	0.018159	1.13468	1.58657	1.90175	0.666097	0.956488	0	3.21481	3.75224	2.8194	0.051918	0.033895	2.38314	1.93426	0.108342	0.357311	5.2237	0.3365	0.162424
2	R11641	Phvul.003G206400.1.p	Phvul.003G206400.v2.1	Chr03	43213017	43215478	Forward	13.0819	10.3669	5.36848	3.17337	18.8042	16.6437	9.15956	8.11249	2.26291	1.695	0.898965	0.513213	6.86599	2.85481	14.9352	12.4635	9.95874	0.432476	13.0983	5.6201	0.660966	0.457267	45.8903	3.04872	84.9283	44.2003	41.715	18.5329	35.1924	0.442555	21.0394	6.77319	7.47385	1.71952	2.27155	30.8274	31.1808	4.10071	9.32223	6.68632	6.33169	4.59227
2	R11641	Phvul.006G028100.1.p	Phvul.006G028100.v2.1	Chr06	10662304	10664415	Forward	0.425781	0.406308	0.023256	0	0	0	0	0	0.139572	0.08039	0.289591	0.126421	0.202027	0.058202	0.075371	0.03875	0.237462	0.051916	0.167858	0	0	0	0.745428	0.113175	1.46242	0.698635	4.72836	1.11063	0	0.08863	0.037235	0.263663	0.91368	0.098121	0.176441	2.63583	0.228812	0.161388	0.274933	0.415282	0.111355	0.170155
2	R11641	Phvul.006G039800.1.p	Phvul.006G039800.v2.1	Chr06	13832454	13834701	Reverse	69.1883	48.2767	0.225212	0.089473	6.35987	5.78359	84.7306	66.8318	1.4218	0.718115	0	0	1.64056	0.444346	5.77981	5.50448	0.367221	0.274091	5.80568	2.03462	0.19539	0.23448	65.8922	0.01745	66.1513	66.4593	68.9125	0	35.5337	0	13.8527	60.2926	29.7962	0.117468	0.166873	130.887	48.1184	0	0.41684	41.4452	0.255631	0.162392
2	R11641	Phvul.006G054100.1.p	Phvul.006G054100.v2.1	Chr06	15967375	15969671	Reverse	0.965638	0.639826	0.126752	0	0.082573	0	3.46158	2.80138	4.39069	2.96131	2.64041	2.26629	0.747676	0.917635	2.93585	2.62917	2.05438	5.54814	20.3366	8.46314	11.4377	9.28693	1.84003	3.73608	11.734	7.11419	3.60325	0.065602	12.1189	6.03525	1.73027	11.8747	3.43945	10.8294	27.3294	7.7916	4.98972	1.4531	2.05335	7.27309	12.0738	8.47224
2	R11641	Phvul.006G054200.1.p	Phvul.006G054200.v2.1	Chr06	15972028	15974534	Reverse	0.491509	3.00592	1.37411	0.629502	13.44	10.4548	0.079972	0.072436	0.767289	0.699798	0.084646	0.42998	0.037663	0.646599	3.67948	4.81045	1.00931	1.74575	6.86985	2.13082	5.40767	4.93898	70.4324	0.852677	6.05855	4.12194	50.3859	31.2542	2.92019	0.714062	0.275547	1.84943	30.6457	2.8531	5.3579	0.560089	0.512575	0.685833	0.954229	0.469334	1.62634	1.95927
2	R11641	Phvul.006G054300.1.p	Phvul.006G054300.v2.1	Chr06	15982893	15985297	Reverse	0.793049	0.563852	0.221618	0.133391	0.093231	0.081372	1.27224	0.735622	0.780712	1.19876	9.9601	8.08642	0.89516	0.581489	0.703924	0.695303	10.9395	43.9008	10.5324	2.74813	78.2456	67.5261	0.574613	38.6279	0.282792	0.071141	0.821824	0.342712	2.93201	26.5473	0.155302	28.1474	0.65057	64.52	45.784	0.762999	0.479139	12.8471	16.0125	1.26153	31.3607	23.6117
2	R11641	Phvul.006G054700.1.p	Phvul.006G054700.v2.1	Chr06	16036409	16038456	Reverse	0.228939	0.33103	0.238651	0.127573	0.260111	0.129511	0.178033	0.075262	0.394082	0.412246	1.50943	1.32275	1.55795	2.08562	0.147892	0.514231	14.7772	1.16637	0.365409	0.115469	1.41918	1.45483	0.176999	10.0162	0.779218	0.162505	0.280321	0	0.289661	0.759287	0.208847	0.891626	0.180777	3.20107	1.57179	0.485519	0.580919	10.5177	20.218	0.319457	2.66096	3.08542
2	R11641	Phvul.006G054850.1.p	Phvul.006G054850.v2.1	Chr06	16109953	16111940	Reverse	0.708504	0.805943	0.225673	0.176416	2.11348	2.30586	0.108739	0.06896	0.511559	0.402461	0.833557	0.780829	0.818707	0.542801	0.418947	0.552829	2.59379	0.946441	1.4556	0.259242	2.01395	1.37194	0.637041	1.6795	1.87188	0.189302	0.61759	0.244073	0.863451	0.620259	0.558094	1.84365	0.191863	1.75863	0.854854	1.53037	1.66484	2.39608	2.58894	0.847522	1.37572	1.42576
2	R11641	Phvul.006G055000.2.p	Phvul.006G055000.v2.1	Chr06	16126991	16129050	Reverse	0.585907	0.496508	0.102477	0.053571	1.22473	1.34207	0.071867	0.018523	0.215275	0.281918	0.43586	0.367886	0.443282	0.302047	0.230192	0.25088	1.40547	0.381683	0.752139	0.127709	0.679345	0.591473	0.32729	0.757512	0.969564	0.124368	0.429697	0.064547	0.601324	0.384931	0.287814	0.705026	0.108858	0.705619	0.402413	0.721638	0.569697	0.975845	1.23667	0.54388	0.758496	0.630277
2	R11641	Phvul.006G209500.1.p	Phvul.006G209500.v2.1	Chr06	30346334	30349439	Reverse	7.09706	6.65193	15.4741	8.66316	4.8711	4.78072	1.88524	1.70333	5.90721	4.25982	8.41372	5.19809	10.2683	9.47152	2.26867	2.2192	11.2592	11.7351	7.54752	2.68384	22.9913	19.6774	3.47194	22.3727	5.91597	4.80857	4.01702	0.238856	10.8025	8.56569	5.76453	18.3849	3.86058	20.8552	19.3064	26.0654	23.9587	11.7465	15.048	7.08217	14.8377	14.3115
2	R11641	Phvul.006G209600.1.p	Phvul.006G209600.v2.1	Chr06	30354309	30356594	Reverse	1.23285	1.09822	2.38311	1.17338	0.865334	0.924428	0.678383	0.620421	1.24954	0.870019	3.25638	2.09764	1.89603	1.98774	0.552146	0.569379	3.5139	11.7643	2.79659	1.32004	30.6492	25.26	0.65868	9.83619	1.18714	1.21533	0.807481	0	5.25987	11.5628	1.68273	14.652	0.882533	21.0063	22.3297	5.03742	4.53284	3.33997	4.89176	2.68134	12.8086	13.0546
2	R11641	Phvul.006G209700.1.p	Phvul.006G209700.v2.1	Chr06	30370137	30372104	Reverse	1.63911	0.843109	1.56967	0.928057	0.175539	0.111017	1.51199	1.43075	1.87479	1.19537	15.7471	10.7834	1.74627	6.67332	0.067103	0.063417	13.0655	102.814	18.4296	5.51679	239.331	209.676	0.744541	70.0677	2.04694	0.876331	0.369957	0.08517	38.1381	87.08	4.24208	118.228	1.40139	188.729	191.242	11.7476	6.57826	15.1148	22.3102	14.9141	113.925	107.104
2	R11641	Phvul.008G155000.1.p	Phvul.008G155000.v2.1	Chr08	31902909	31904826	Reverse	5.85902	5.57574	3.85931	2.77514	7.05147	5.70221	15.3538	11.4973	24.3886	15.2172	18.037	11.5095	9.14426	6.12596	91.7326	90.1471	0.618584	0.832584	2.50827	1.41681	0.459686	0.66113	7.07105	0.513511	3.00451	4.0271	10.7868	0	2.85603	0.44201	6.5057	7.17803	2.82712	0.625335	1.26023	3.36221	1.70504	1.05197	1.58952	8.4166	4.11658	3.02537
2	R11641	Phvul.009G172100.1.p	Phvul.009G172100.v2.1	Chr09	25581220	25583151	Forward	0.151887	0.592355	0.102761	0	2.93011	2.63376	0.409793	0.182952	0	0	0	0	0.03178	0.046199	0.443683	0.332652	0	0	0.243264	0.117584	0	0	14.3606	0	0.330133	0.277939	13.4437	1.06352	0	0	0.046182	0	5.82941	0.015248	0	0.114825	0.281082	0	0	0	0	0
2	R11641	Phvul.009G172200.1.p	Phvul.009G172200.v2.1	Chr09	25593158	25594911	Forward	1.64888	1.76316	0	0	0	0	0.769024	0.886567	1.22574	0.998675	0.263408	0.272021	0.539219	1.10181	0.141159	0.109683	0	0	3.04617	1.55547	0	0	0.046397	0	0	0.269578	0.022011	0	0.798525	0	0	0	0.070031	0	0	0.452494	0.424258	0	0	0	0	0
2	R11641	Phvul.010G010900.1.p	Phvul.010G010900.v2.1	Chr10	1669390	1672672	Reverse	0.211164	0.297706	0	0	0	0	0	0	0	0	5.61175	4.67647	0.186064	0.111998	0.017276	0	3.6564	33.695	0.090874	0.102755	29.0399	27.4274	0.131318	18.7237	0.017246	0	0	0	0	23.3705	0	10.478	4.5337	37.0995	33.454	2.80765	0.606841	8.1866	15.8792	1.61276	42.2266	37.9421
2	R11641	Phvul.010G011000.1.p	Phvul.010G011000.v2.1	Chr10	1660202	1663311	Reverse	1.24958	0.935184	0	0	0.101745	0	0.103531	0.137763	0	0	18.7512	16.4145	0.800483	0.446298	0.154882	0.161745	11.1575	130.446	0.355862	0.250984	105.561	98.1623	0.953944	82.4307	0	0.103546	0.131355	0	0.08849	81.2097	0.099056	42.946	1.60353	161.471	145.897	12.2663	2.41329	35.8648	61.9405	5.94701	183.838	152.431
2	R11641	Phvul.010G077000.1.p	Phvul.010G077000.v2.1	Chr10	20385333	20387250	Reverse	617.921	678.322	781.667	828.673	693.094	779.955	49.2342	40.4483	20.8331	15.2046	43.8884	32.1769	37.7212	81.3059	140.976	122.785	10.4214	0.852772	0.827391	0.232597	1.19685	1.23517	158.412	0.635643	0.399238	18.1535	136.913	2.21603	0.020095	0.337919	0.049507	0.618201	45.8027	0.149913	0.193974	0.008078	0	0.64271	0.599068	0.028316	0.492598	0.59623
2	R11641	Phvul.010G079100.1.p	Phvul.010G079100.v2.1	Chr10	28943317	28945243	Forward	4.08191	2.21957	0	0	0	0	7.18792	5.34728	0	0	0.40629	0.377519	0	0	0.047187	0	0.603659	0.067996	0.165712	0.133814	27.7659	24.6001	0	0.159604	0	0	0.078435	0.046523	0.204014	2.51642	0.107186	10.2554	0.055506	1.83416	53.9307	0.060938	0	0	0.122777	0	0.507955	0.336838
3	R03625	Phvul.006G017400.1.p	Phvul.006G017400.v2.1	Chr06	8197094	8201997	Reverse	1158.86	610.692	554.601	308.031	388.031	274.342	30.7109	15.6221	2.69778	1.68541	10.8256	6.72861	11.4103	24.1934	42.8323	41.6845	34.5927	1.59135	1.25319	0.247179	1.04402	0.893741	97.0755	2.11471	1.85366	5.40002	83.2761	0.749636	0.912429	0.821354	3.8497	7.40482	21.5941	0.786292	0.747091	3.12532	0.038055	8.01126	10.3534	7.26832	4.36915	4.13328
3	R03625	Phvul.006G017500.1.p	Phvul.006G017500.v2.1	Chr06	4804136	4806473	Reverse	2.87449	1.78185	2.04876	0.762404	0.731899	0.229292	3.6685	2.89179	4.15117	2.62775	3.22283	1.90645	2.01889	1.16569	0.958759	0.772827	1.21682	8.1984	0.960631	0.164909	9.09797	7.52302	0.311093	5.25499	1.90329	0.302131	2.48338	0	0.524026	8.32987	1.28102	8.03997	14.7381	7.04708	6.14962	43.9185	0.158491	1.40852	1.63126	3.3093	11.3561	9.26592
3	R03625	Phvul.006G017600.1.p	Phvul.006G017600.v2.1	Chr06	4690676	4696021	Reverse	9.9093	8.49996	284.656	153.43	27.2742	18.2925	1.19501	0.84965	14.1403	7.75102	1.69869	1.28784	38.8602	5.88167	0.337494	0.288427	0.261479	0.137249	1.16248	0.6195	0.435371	0.480571	0.339305	0.177854	0.09683	0	0.279081	0	1.46351	0.129924	0.42281	1.22931	0.036785	0.200678	0.388688	3.10529	0.515018	0.11659	0.095476	1.89192	0.564348	0.389362
3	R03625	Phvul.006G205600.1.p	Phvul.006G205600.v2.1	Chr06	30060015	30062254	Reverse	16.7311	10.6254	14.6806	13.6281	19.9065	16.9938	3.89964	4.18792	2.75102	1.32321	0.817363	0.661116	0.632062	3.96144	7.31508	6.04179	2.02599	0.806251	0.624183	0.794499	1.3271	1.18324	6.55654	3.08948	2.4813	5.83216	16.5271	1.31115	0.751295	0.488434	1.15722	0.703079	43.2784	1.40996	0.989207	1.30014	1.91378	1.93749	1.52896	0.281257	3.3976	2.63628
3	R03625	Phvul.006G205700.1.p	Phvul.006G205700.v2.1	Chr06	30064901	30067021	Reverse	29.8135	13.2121	32.9905	32.2227	8.44618	9.10158	6.71085	6.3792	6.17035	4.63637	7.36564	7.37191	6.12491	16.3195	2.66633	2.81695	26.5675	25.2236	3.03472	4.34609	29.3082	26.2632	3.85728	59.7602	2.75742	4.41185	2.80631	1.63756	7.17455	7.82408	3.07265	13.0098	11.4078	46.7065	41.5701	14.4127	18.2702	32.3095	32.8673	1.90654	93.0445	78.2115
3	R03625	Phvul.008G174700.1.p	Phvul.008G174700.v2.1	Chr08	49306400	49308323	Forward	5.71858	4.45028	3.88293	2.69104	2.58756	2.23523	7.74311	9.67928	15.1497	13.5179	8.1885	6.59901	12.442	20.922	17.2612	17.8037	2.56473	2.40384	23.9461	13.5427	1.29269	1.06464	26.9082	2.30393	61.3166	85.3162	49.6517	29.6464	28.3662	0.922574	39.1204	37.2273	66.5934	1.43411	1.80006	15.0518	12.4888	3.86777	3.10638	56.0487	7.3557	5.08137
3	R03625	Phvul.008G175300.1.p	Phvul.008G175300.v2.1	Chr08	49413350	49415585	Reverse	11.7527	7.69087	1.75713	1.29882	2.96373	1.65645	0.274786	0.753208	1.31211	0.60408	1.20088	1.21373	4.42746	3.17765	18.6797	20.5572	1.95904	1.0758	1.22477	0.936039	1.29017	1.10281	21.5071	1.85235	120.851	103.923	33.7983	16.7654	8.98633	2.79349	178.367	2.29995	41.0646	4.79777	7.78813	30.361	25.1976	1.81683	2.85036	1.13627	4.49122	2.7938
3	R03625	Phvul.008G175500.1.p	Phvul.008G175500.v2.1	Chr08	49528636	49531128	Reverse	33.8821	23.2496	1.06194	0.635193	0.762705	0.615153	1.20589	3.19824	3.61547	1.50928	5.4428	3.67463	19.501	11.603	74.1548	76.0455	0.93928	0.157967	0.25069	0.124897	0.270353	0.197703	5.77439	0.308365	16.7075	14.0193	9.88931	2.60791	1.14797	0.360268	34.5686	0.531638	11.8661	0.531881	1.19723	3.81071	2.95746	0.491194	0.486178	0.283394	0.55916	0.408248
3	R03625	Phvul.008G175600.1.p	Phvul.008G175600.v2.1	Chr08	49562418	49565723	Reverse	11.1464	5.17853	1.08733	0.958764	0.911186	1.05222	1.16991	0.908425	0.719003	0.37108	37.7467	27.8439	3.63974	17.7681	0.543077	0.323445	15.2258	4.26041	0.194618	0	0.189594	0.074156	0.094006	9.71983	0.048358	0	0.194291	0	0	2.54191	0.127062	0.101515	0	3.93619	1.18053	0.104787	0	21.1623	24.4231	0	6.85053	5.73232
3	R03625	Phvul.011G158500.1.p	Phvul.011G158500.v2.1	Chr11	45151336	45153794	Forward	0.6126	0.089733	0.087416	0	0	0	0.070408	0.065977	0.222238	0.260625	4.14232	3.01145	0.221369	1.34249	0.108728	0.118231	0.913553	5.93507	0.504116	0.157194	3.52477	2.54033	0.202932	15.3935	0	0	0	0	0.230664	3.01301	0.434185	4.36602	0.127319	7.3104	3.75792	0.361065	2.15214	4.69427	2.17995	2.88653	6.09031	6.02543
4	R10040	Phvul.001G076700.1.p	Phvul.001G076700.v2.1	Chr01	11108549	11111680	Forward	1.21704	0.871149	108.413	42.8375	3.56434	1.90191	0.308315	0.529251	3.64278	3.05928	2.1872	2.02341	2.53777	43.6889	11.0787	11.7098	0.627248	0.929309	3.10036	0.147624	0.071633	0.083085	29.9862	0.251525	64.127	54.5725	107.097	6.44957	1.92076	0.888501	13.355	30.6556	830.064	0	0.057923	1.21533	0.921784	0.395898	0.114048	42.141	0.072089	0.077881
4	R10040	Phvul.001G076750.1.p	Phvul.001G076750.v2.1	Chr01	11113937	11116824	Forward	1.21878	0.675904	112.313	43.7196	3.85701	2.12816	0.362869	0.509993	3.80929	2.29519	2.2671	1.54787	2.84688	44.3788	10.1918	12.2944	0.632367	0.774692	3.14143	0.163638	0.089	0.084869	29.6154	0.240095	64.6933	53.8933	103.178	4.75159	2.06323	0.815015	12.765	32.8215	849.654	0	0.061521	1.21508	1.06405	0.323267	0.143457	44.0731	0.065319	0.074654
4	R10040	Phvul.001G112600.1.p	Phvul.001G112600.v2.1	Chr01	31814812	31818319	Forward	4.83108	23.0525	120.035	93.0952	133.039	120.464	3.91695	3.61216	33.7465	18.8965	2.23207	2.90989	10.7625	18.0812	60.1606	60.122	0	0.600065	98.749	59.9012	0.518436	2.11455	46.6232	0.580207	12.2066	22.8067	37.9149	10.7218	30.9496	0.498807	7.29926	9.0185	21.6267	0.427808	0.633635	19.9575	21.083	0.613046	0.356297	4.69337	1.30522	0.135545
4	R10040	Phvul.001G112600.2.p	Phvul.001G112600.v2.1	Chr01	31814812	31818319	Forward	0.797336	16.2981	28.4105	18.4385	26.7093	15.5069	0.934141	0	12.4835	14.5549	0.828703	0	3.46776	2.88936	14.2561	15.2888	1.64168	0	3.15448	5.36645	1.64363	0	23.3536	0	3.10418	0	15.827	13.6885	20.8353	0	2.50594	2.62696	16.7944	0.547714	0	5.27015	5.09897	0	0	3.70482	0	0.714305
4	R10040	Phvul.001G112700.1.p	Phvul.001G112700.v2.1	Chr01	31777663	31781379	Forward	0.161322	0.122401	0.2385	0	0.275196	0.320517	0.100181	0.815254	0.520951	0.761877	4.70851	3.08697	72.5713	0	24.9149	32.1738	0.498296	0.684239	0.757081	0.43638	2.03789	1.77272	6.20562	0.247552	15.3014	6.12508	13.9633	13.2206	0.351387	0.662944	0.37262	1.30315	13.7265	1.37377	0.850575	0.667291	1.1095	0.503962	0.234363	0.886411	1.16649	1.26514
4	R10040	Phvul.002G102800.2.p	Phvul.002G102800.v2.1	Chr02	21848877	21859424	Forward	24.4028	12.3665	7.76577	4.63244	5.06803	3.59092	11.6929	6.78518	17.9185	13.0669	3.07395	2.54134	7.67147	5.98524	4.62944	4.49237	5.54915	7.18038	11.2237	4.98906	6.18627	5.41359	15.7397	5.7276	12.708	6.32796	5.49502	2.1114	10.0897	7.82655	10.1714	7.6186	3.73932	12.2231	10.8682	19.7521	11.5502	5.36187	6.58017	7.49672	11.1372	8.62477
4	R10040	Phvul.003G076700.1.p	Phvul.003G076700.v2.1	Chr03	12211138	12214935	Forward	14.172	14.6918	21.7001	10.529	32.1459	23.2793	16.2367	11.4846	22.8456	13.3684	16.2098	10.9009	13.7664	12.6709	17.5158	19.3518	20.7439	16.9025	62.5823	16.3067	16.4273	15.4017	10.3983	13.1808	12.7735	17.2731	7.39883	1.56674	23.6407	7.12867	14.5909	15.3512	9.96736	13.0608	7.21692	14.7151	10.4133	18.4976	19.9468	26.9589	13.3286	12.966
4	R10040	Phvul.003G076800.1.p	Phvul.003G076800.v2.1	Chr03	12234679	12238181	Forward	56.9043	46.7024	78.4173	39.7989	54.9316	39.9787	44.6187	33.5313	74.6323	47.1153	28.167	19.1823	92.3324	51.9792	42.1209	41.9282	92.6978	4.50787	10.957	10.2479	3.36215	2.99314	7.91482	19.2641	4.44059	15.6619	6.89375	2.16732	6.53413	1.73748	5.13366	13.5466	8.44687	3.20919	1.47208	32.5952	28.2756	50.8291	79.1675	15.4073	14.2729	11.0948
4	R10040	Phvul.004G050500.1.p	Phvul.004G050500.v2.1	Chr04	6469550	6474248	Reverse	0	0	0	0	0.038479	0	0	0	0	0	0	0	0	0	0	0	0	0	0	0	0	0	0	0	0	0	0	0	0	0	0	0	0	0	0.019495	0	0	0	0	0	0	0
4	R10040	Phvul.004G100700.1.p	Phvul.004G100700.v2.1	Chr04	33905617	33908422	Reverse	0	0	0	0	0	0	0	0	0	0	0	0	0	0	0	0	0	0	0.658766	0.351347	0	0	0	0	0	0	0	0	0	0	0	0	0	0	0	0	0	0	0	0	0	0
4	R10040	Phvul.004G151800.1.p	Phvul.004G151800.v2.1	Chr04	45449566	45453722	Reverse	1002.6	1000.68	1617.99	1463.5	583.423	481.329	225.165	140.409	917.465	700.544	368.425	282.079	620.929	457.929	286.344	257.71	284.167	146.212	429.249	149.572	202.458	176.045	624.801	240.463	157.617	133.315	173.1	57.9893	313.957	48.28	41.9039	242.064	89.2829	206.574	132.757	345.53	167.268	239.93	275.628	345.41	254.838	168.497
4	R10040	Phvul.005G035300.1.p	Phvul.005G035300.v2.1	Chr05	3300894	3309521	Forward	13.9796	25.6586	52.5544	45.538	71.3302	61.7502	2.64338	2.43961	14.6043	10.8338	9.53484	8.08202	14.5029	12.8734	24.0545	26.126	19.7108	11.0231	5.9417	2.69238	5.47134	5.65694	25.2917	24.1963	7.8577	6.64472	20.8467	6.44989	6.47079	6.48807	4.38784	9.72006	14.0561	12.338	6.67025	15.2032	13.9467	25.9392	28.3954	9.43668	18.5881	15.923
4	R10040	Phvul.005G039100.1.p	Phvul.005G039100.v2.1	Chr05	3796730	3804502	Forward	0	0	0	0	0	0	0	0	0	0	0	0	0	0	0	0	0	0	0	0	0	0	0	0	0	0	0	0	0	0	0	0	0	0	0	0	0	0	0	0	0	0
4	R10040	Phvul.005G039200.1.p	Phvul.005G039200.v2.1	Chr05	3809328	3815125	Reverse	337.968	259.723	2717.91	2712.63	359.719	408.787	85.4125	67.8436	205.601	161.691	246.928	267.035	676.802	292.755	35.1559	41.9557	1560.48	193.107	245.574	101.881	19.8696	20.4029	21.9967	691.727	3.08513	184.973	7.61445	0	146.578	109.774	37.3635	151.336	4.83598	160.771	76.6182	607.209	265.064	1552.19	1736.35	256.667	548.47	430.123
4	R10040	Phvul.005G082800.1.p	Phvul.005G082800.v2.1	Chr05	21493012	21497153	Reverse	0	2.04994	0	0.918459	0	0	0	0	0	0	0	0	2.95437	0	1.2146	0	0	0	0	0	1.50931	0	0	0	0	0	0	0.99045	2.90748	0	0	0	0	0	0	0	0	0	0	0	0	0
4	R10040	Phvul.005G082800.2.p	Phvul.005G082800.v2.1	Chr05	21493012	21497153	Reverse	2.00638	0.112085	1.8419	0.244638	4.18938	3.72622	1.60399	2.55861	2.16571	4.00852	1.44255	2.06772	0.86983	1.78403	0.386422	2.57095	3.17087	1.91165	2.14005	1.6501	1.2425	1.86257	2.90703	2.01303	4.86048	2.19966	3.20236	2.34229	0.199618	1.80046	3.40252	1.66929	1.36438	1.79683	1.33647	1.5265	2.86897	1.57824	2.94005	0.45886	2.01254	3.06968
4	R10040	Phvul.005G082800.3.p	Phvul.005G082800.v2.1	Chr05	21493012	21497153	Reverse	4.14822	2.20451	6.26014	1.44724	6.30961	0	2.87786	0	5.54601	0	11.9444	9.02777	5.87842	4.75843	4.67786	5.43643	3.7937	5.8296	6.45795	0	6.43451	6.70334	11.2147	6.7222	13.2335	0	8.83337	0.192875	5.01189	1.20755	0	6.44797	5.97374	7.33855	5.15619	7.79006	4.15675	9.9456	7.45068	4.91705	8.52083	8.37273
4	R10040	Phvul.005G082900.1.p	Phvul.005G082900.v2.1	Chr05	21529999	21533766	Reverse	3.05366	3.37492	8.90177	4.16791	13.5235	7.47393	4.3407	3.04182	4.9128	3.91784	4.70601	3.30779	10.0327	8.814	18.9723	25.6001	21.5181	4.09367	9.91253	4.51738	3.00715	3.06857	34.4325	6.86325	48.7198	7.13624	29.5774	13.1207	10.0615	1.78801	21.5773	8.95412	54.26	3.18234	1.74704	17.79	12.52	24.3898	35.4367	10.9426	6.73789	7.05812
4	R10040	Phvul.005G150600.1.p	Phvul.005G150600.v2.1	Chr05	38091756	38098823	Reverse	0	0	0	0	0.110813	0	0	0	0	0	0	0	0	0	0.087751	0	0.107541	0	0	0	0	0	0.56809	0	0.086118	0	0.463019	0	0	0	0	0	0.051452	0	0	0	0	0	0.041341	0	0	0
4	R10040	Phvul.005G151300.1.p	Phvul.005G151300.v2.1	Chr05	38148945	38151839	Reverse	0.332667	0.143395	2.70587	0	1.02868	0	0.445381	0.173864	0	0	0.794723	0.486632	0.692886	1.50977	0	0.129105	4.48492	0.291624	1.14983	0.208772	0	0.108219	0.203263	3.06889	0	0	0	0	0	0.62496	0.171762	0	0	0.369064	0.046187	1.13613	1.7808	4.13218	9.45401	0	0.416719	0.823132
4	R10040	Phvul.005G151400.1.p	Phvul.005G151400.v2.1	Chr05	38166212	38169004	Reverse	0	0	2.84959	0	0	0	0	0	0	0	0.09815	0	0	0	0	0	0	0	1.09828	0	0	0	0	0.56965	0	0	0	0	0	0	0	0	0	0	0	0	0	0	1.70356	0	0	0
4	R10040	Phvul.005G151500.1.p	Phvul.005G151500.v2.1	Chr05	38173368	38178506	Reverse	3.78364	45.446	802.194	449.731	299.237	160.663	0.127433	0.297839	69.4464	55.0423	0	0	95.0455	107.699	0.508967	0	0.367302	0	132.518	14.757	0	0	0.787454	0	0.073696	0	0	0	2.59142	0	0	0	0	0	0	0	0	0	0	0	0	0
4	R10040	Phvul.005G151600.1.p	Phvul.005G151600.v2.1	Chr05	38182241	38185199	Reverse	0.273634	3.94537	56.4002	40.2376	24.8657	17.1678	0	0	3.84963	0	0	0	4.87827	5.32779	0	0	0	0	7.16327	0	0	0	3.33585	0	0	0	8.40753	0	0	0	0	0	5.77665	0	0	0	0	0	0	0	0	0
4	R10040	Phvul.005G151700.1.p	Phvul.005G151700.v2.1	Chr05	38194573	38198615	Reverse	0	1.68835	0.59041	0.477037	9.40948	6.36042	0.29656	0	0	0	0	0	0	1.09348	6.08813	6.25276	0	0	0	0	0	0	12.3163	0	1.08211	0	11.5258	0	0	0	0	0	1.67387	0	0	0	0	0	0	0	0	0
4	R10040	Phvul.005G151800.1.p	Phvul.005G151800.v2.1	Chr05	38204305	38208988	Reverse	0	5.78998	0.957349	0.510557	31.5959	24.2401	0.61268	0.149755	0	0	0	0	0	0.212958	12.7252	13.1363	0	0	0.074468	0	0	0	31.47	0	2.81082	0	27.9807	2.42199	0	0	0	0	4.17216	0	0	0	0	0	0	0	0	0
4	R10040	Phvul.006G065600.1.p	Phvul.006G065600.v2.1	Chr06	17624125	17630580	Forward	22.5664	12.9298	23.8558	9.26116	18.9593	11.0366	15.115	10.7234	24.8845	15.9512	52.7216	37.8291	41.0653	38.161	23.9488	31.6783	33.9478	18.4224	18.2421	4.62928	14.6681	12.9318	38.7395	46.8179	72.591	6.37109	33.847	13.9682	32.1164	8.63339	18.4211	30.5647	24.8678	25.8482	15.1337	34.1062	28.3382	64.7513	69.602	28.493	35.3151	44.6891
4	R10040	Phvul.006G128800.1.p	Phvul.006G128800.v2.1	Chr06	23658078	23665682	Forward	43.649	29.9863	56.6214	31.0027	29.3485	24.1409	3.59101	2.64027	19.5062	13.5672	11.3183	9.01439	31.1969	30.9907	17.4797	19.3683	38.8365	17.3467	14.818	8.43711	10.4876	9.55635	19.5604	35.0908	16.2145	3.55117	14.2223	4.27241	13.9244	16.0219	27.7356	14.9411	11.655	18.4072	9.74889	36.7962	31.3847	48.2231	48.7295	17.655	16.9557	15.7978
4	R10040	Phvul.006G151300.1.p	Phvul.006G151300.v2.1	Chr06	25662222	25670228	Reverse	1049.72	803.068	1841.09	1339.67	1034.49	795.84	259.194	183.284	42.2056	34.0939	0.629014	0.422891	42.6281	90.1837	95.813	81.9319	0.697382	0	27.3483	7.75293	0.529577	0.468863	47.472	0.208062	2.93405	2.70362	28.5437	1.84683	3.12605	0	0	0.423881	8.81241	0.013469	0.803502	0.799312	1.80143	0.824107	0.171841	0.227495	0.13599	0.034383
4	R10040	Phvul.006G151400.1.p	Phvul.006G151400.v2.1	Chr06	25675237	25682855	Reverse	203.071	118.479	248.6	112.487	162.082	98.373	95.2477	59.5014	9.98406	7.99607	0.459394	0	4.77816	11.33	13.5765	12.9291	0.767313	0	30.0881	9.52717	0.26247	0	14.4089	0	17.4631	5.20935	7.83587	0	32.8363	0	2.24651	1.82392	3.69456	0	0.056319	10.4415	23.1836	0	0.046301	2.74192	0.422399	0.04609
4	R10040	Phvul.007G250300.1.p	Phvul.007G250300.v2.1	Chr07	37269956	37273451	Reverse	33.0539	56.9106	100.246	75.3437	128.933	139.851	22.3132	14.1574	19.0653	13.5745	10.5983	8.25892	17.7747	21.777	27.0203	25.1329	57.7607	35.392	14.6286	8.21863	16.0965	14.3234	126.312	47.3932	37.4621	17.182	99.5432	19.5105	8.12776	24.9194	18.4017	12.624	59.857	38.1161	22.8303	43.3314	28.4432	62.9015	69.4533	21.4022	37.9891	27.5594
4	R10040	Phvul.007G273800.1.p	Phvul.007G273800.v2.1	Chr07	39470581	39473978	Forward	7.50037	11.4137	25.8309	18.4116	34.4659	24.7441	5.37023	3.88582	16.0539	13.434	11.1231	8.67164	12.7818	10.5889	21.7888	20.7326	11.463	16.243	16.498	8.1278	15.7731	13.9687	26.8666	12.0414	20.0164	7.85101	24.2322	5.98868	14.6755	14.1069	10.6009	14.4317	15.5459	17.1998	10.4997	22.7692	17.3905	13.3333	17.8737	11.5463	15.1311	13.3789
4	R10040	Phvul.008G097000.1.p	Phvul.008G097000.v2.1	Chr08	9991541	9995028	Reverse	28.3317	25.7187	0	1.5695	0	1.33784	8.21266	7.54881	15.1042	0	22.0598	0	21.1181	8.80209	3.73489	0	13.1438	7.15251	4.14374	0	0	4.96895	2.90856	17.8803	5.53756	0	1.00029	0	0	0	0	9.75825	0	1e-06	8.24518	0	14.8065	17.398	0	0	22.6014	0
4	R10040	Phvul.008G097100.1.p	Phvul.008G097100.v2.1	Chr08	10016568	10020175	Reverse	43.6486	23.1051	12.8809	0	3.11399	1.63627	10.574	10.1746	12.3579	16.1815	49.9984	29.9101	34.147	23.7253	3.08559	9.10052	11.6968	19.2319	23.2415	0.521671	5.87434	13.3994	2.0892	35.8916	12.1088	1.76554	0.626415	1.22001	16.9462	4.66775	7.42134	5.42336	1.47102	17.5998	6.68358	33.4297	25.9381	44.1359	39.9781	11.9974	37.0527	34.0059
4	R10040	Phvul.008G097100.4.p	Phvul.008G097100.v2.1	Chr08	10016568	10020175	Reverse	2.45026	3.85876	1.49081	3.31915	0	0	5.19283	0	4.83743	0.99183	4.65631	11.2703	11.6519	4.27552	3.10414	0.811602	13.1367	4.63255	0.260694	4.2261	5.39091	0.893086	1.68975	16.0116	3.07929	0	2.62715	0	1.51906	4.18433	0.564063	4.2042	0	5.15766	8.36874	2.47492	3.99285	3.31282	7.49464	1.68156	3.77722	6.089
4	R10040	Phvul.008G097200.1.p	Phvul.008G097200.v2.1	Chr08	10031043	10035365	Forward	8.93581	9.56475	6.52336	3.33655	19.7402	15.5963	19.8664	13.7138	30.9685	20.5223	23.4037	17.2339	24.3747	17.7374	96.8117	99.4148	2.10009	0.433979	4.1745	2.46986	0.211681	0.261138	18.7757	0.607412	137.858	14.0873	39.9168	38.0613	7.7466	0.402351	24.5046	8.29246	24.0918	0.426501	0.401188	38.1023	29.8369	4.83754	2.76381	13.6407	1.42701	1.50976
4	R10040	Phvul.008G097600.1.p	Phvul.008G097600.v2.1	Chr08	10085577	10090188	Forward	13.1813	12.1785	33.1688	18.6932	20.0683	12.0542	14.3881	10.2234	11.444	6.05692	4.70966	3.38786	19.4062	14.0865	20.5347	19.558	3.96293	0.085664	0.497589	0.531198	0.062968	0.071098	10.0012	0.354057	9.63725	11.9192	13.5243	2.4768	0.797353	0	1.82406	0.61403	8.12816	0.053873	0.059286	4.53501	2.33499	5.12032	1.45602	1.49114	0.346928	0.27837
4	R10040	Phvul.008G097700.1.p	Phvul.008G097700.v2.1	Chr08	10092412	10098264	Forward	1.1798	18.7139	3.95162	2.36933	87.0435	66.4516	2.73819	2.58811	4.80801	2.18503	2.06103	1.9365	4.93113	4.43763	25.9025	30.5781	2.15027	0.356425	1.51574	0.479761	0.189751	0	23.4202	0.511656	37.072	4.01864	39.9667	13.3404	1.54567	0.126153	9.97127	4.13214	14.7474	0.204813	0.243978	7.14339	3.58106	3.61561	2.82444	2.74619	0.547491	0.676119
4	R10040	Phvul.008G210100.1.p	Phvul.008G210100.v2.1	Chr08	55819558	55823620	Forward	9.33084	6.49239	21.9248	14.0047	8.52843	5.64033	0.652683	0.369422	9.36324	5.26207	60.3839	44.9916	22.6096	35.9384	1.24289	1.72178	51.1836	52.6983	2.81454	1.01158	30.0889	25.4281	1.6579	79.801	3.25486	0.849016	0.476777	0.270659	1.74819	24.3725	1.18243	11.8892	0.867222	43.779	13.9565	13.1445	7.41739	57.5803	64.6544	1.51994	48.2508	38.9173
4	R10040	Phvul.011G055800.1.p	Phvul.011G055800.v2.1	Chr11	4917871	4921229	Forward	0	0.730381	0	0	3.86298	3.00423	0	0.232833	0	0.065283	2.22287	0.969376	76.0633	0	25.1904	32.6263	0	0	0	0	0	0	45.1413	0	141.016	25.1833	42.8405	26.8144	0	0	0	0	60.8373	0	0.0632	0	0	0	0	0.046722	0	0.045675
4	R10040	Phvul.011G055900.1.p	Phvul.011G055900.v2.1	Chr11	4939643	4942911	Forward	0	0.880854	0	0	6.60578	2.4741	0	0.79644	0.509726	0.808355	1.52193	1.39053	60.411	0	23.2622	26.2484	0.109254	0	0.341237	0	0	0	26.1819	0.119581	21.2904	6.36592	47.0521	3.48869	0	0	1.13509	0	114.359	0	0	0.052028	0	0	0	0.167576	0	0
4	R10040	Phvul.011G056000.1.p	Phvul.011G056000.v2.1	Chr11	4948966	4953379	Forward	0	1.05081	0.378028	0	10.0619	3.54942	0	0	0	0	0	0	0	0	1.70882	1.97705	0	0	0	0	0	0	10.6517	0	4.15296	1.68226	3.25726	0	0	0	0.301598	0	8.82813	0	0	0	0	0	0	0	0	0
4	R10040	Phvul.011G056100.1.p	Phvul.011G056100.v2.1	Chr11	4956636	4959678	Forward	0.027834	0	2.82862	1.44978	0.102521	0.17878	0.0988	0	1.2215	0.814985	1.18343	1.11251	7.71887	1.56162	5.45044	5.55865	0.192597	0.267301	0.561851	0	0	0	10.8475	0.061434	50.7849	7.03319	29.902	2.80853	0.333697	2.37306	5.3813	6.34932	179.745	0.025127	0	0.493868	0.169888	0.081358	0.065266	25.8044	0	0
4	R10040	Phvul.011G056200.1.p	Phvul.011G056200.v2.1	Chr11	4964361	4968545	Forward	3.14096	2.28092	3.08508	1.69289	2.2763	1.97695	0.905524	0.434883	2.52603	1.55298	3.2685	2.76665	5.20615	4.50906	2.96877	3.19482	5.18159	2.99447	3.7158	1.21948	1.66494	1.71876	6.25582	6.36609	10.7359	2.1592	4.53953	3.5251	3.22166	1.50761	2.90952	3.36968	1.62764	2.65703	1.6762	6.23534	6.65356	4.03076	5.1486	3.90637	3.14173	3.14113
4	R10040	Phvul.011G056300.1.p	Phvul.011G056300.v2.1	Chr11	4971204	4976065	Forward	0.216969	0	0.331485	0	0.233591	0	1.77185	1.18261	1.76003	1.27709	2.78826	1.95497	4.52996	3.92456	1.12943	1.10071	0.858906	0	0.539036	0	0	0.215718	0.126803	0.49786	2.27188	0	0	0	0.57004	0.205453	0.303915	1.19264	0.095082	0.290244	0	0.707821	0.264056	2.22216	1.91984	1.00537	0.656401	0.659736
4	R10040	Phvul.011G056400.1.p	Phvul.011G056400.v2.1	Chr11	4978623	4982648	Forward	3.50863	2.94568	5.21701	2.40405	6.01755	3.87725	0.842625	0.464518	1.09461	0.573322	0.818182	0.732299	1.18856	3.13153	2.60011	3.77152	1.15356	0.81057	1.16824	0.452713	3.38379	3.00486	12.0116	1.30357	7.84177	2.45935	7.37345	3.1091	0.784228	0.154523	0.923962	1.6784	4.13961	0.500159	0.340982	0.17311	0.228868	0.717853	0.594682	0.129412	0.308003	0.336679
4	R10040	Phvul.011G145900.1.p	Phvul.011G145900.v2.1	Chr11	37759061	37764188	Forward	3.12476	1.47699	0.754329	0.634282	0.725008	0.428929	1.47263	0.95554	1.34086	0.917539	0.359024	0.307962	0.320311	0.294445	4.04092	4.82881	0.299934	0.658228	4.42574	0.702386	0.412936	0.782504	4.1801	0.305113	5.96171	0.728986	2.67959	0.973844	2.20402	0.473162	1.9399	1.89734	2.0791	1.00918	0.71355	3.59114	3.65228	0.703769	0.33634	5.63787	0.981306	0.338231
4	R10040	Phvul.011G201700.1.p	Phvul.011G201700.v2.1	Chr11	51733142	51737191	Forward	0.427795	0.528633	2.6736	1.39553	19.9776	3.40011	0.569913	0.987936	4.48349	4.69291	0.723761	1.36597	4.0907	2.27063	5.58348	6.43432	1.22427	0.822889	53.904	10.4375	9.27318	3.9849	8.09569	3.41086	6.12843	1.75796	5.01282	0.631679	19.0079	0.585924	7.81545	5.30897	2.61177	5.60372	0.877313	9.59852	8.52438	2.51658	1.56393	8.79462	1.6847	2.92118
4	R10040	Phvul.011G202000.2.p	Phvul.011G202000.v2.1	Chr11	51748695	51752673	Forward	0	0.263467	0.974269	0	2.61394	0	0	0	0	0	0	0	0	0.514025	0	0	0.658689	0.574052	8.58442	1.24038	1.559	1.36301	1.17828	0.470353	0	0	0.93615	0	3.38366	0	1.63183	1.58444	0	0.940536	0.523548	2.13543	1.50845	0	0	1.58535	0	0.393788
4	R10040	Phvul.011G202500.1.p	Phvul.011G202500.v2.1	Chr11	51812114	51816296	Reverse	0.274006	0.706592	1.06019	0	2.80702	1.17081	0.233015	0.192043	1.15639	0.984328	0.385016	0	1.20587	0.622592	1.04038	1.54502	0.62856	0.712794	9.73266	1.28159	1.75179	1.37526	1.36251	0.667511	1.48871	0.24042	1.21018	0	4.47865	0.676425	2.04279	2.18317	0.592213	1.20693	0.609554	2.42003	1.27163	0.550336	0.628058	2.01958	0.64783	0.484449
4	R10040	Phvul.011G214300.1.p	Phvul.011G214300.v2.1	Chr11	53393982	53400051	Reverse	0.982361	0.664815	1.84266	0.894182	1.49479	0.925884	0.170379	0.18699	1.1859	1.14639	0.998667	1.13223	1.90803	3.292	1.40168	2.10995	4.26952	1.35586	1.17613	0.456937	0.476679	0.349053	1.73682	3.76066	6.16205	0.647058	1.40259	0.620955	2.86657	0.273463	1.07691	2.33149	0.933535	0.959553	0.524619	2.22572	2.52161	8.6807	8.62822	2.14048	1.78152	2.3036
5	R01553	Phvul.002G022300.1.p	Phvul.002G022300.v2.1	Chr02	2389494	2391172	Forward	1.42152	1.03636	0.62222	0.613128	0.424108	0.316279	0.266739	0.213398	3.08238	2.18816	0.961768	0.710561	7.47721	0.987099	4.06116	4.33519	7.05796	0.456002	4.07808	3.86778	0.135522	0.145168	2.8157	1.04577	3.89739	13.6365	1.64681	0	7.67553	0.91167	8.68783	4.1341	2.10695	0.561423	0.288098	66.4623	39.16	5.19416	7.30522	10.5183	0.987034	0.807604
5	R01553	Phvul.003G248025.1.p	Phvul.003G248025.v2.1	Chr03	48530639	48532632	Forward	2.17665	3.09435	0.091314	0.312994	1.22126	0.647562	10.8331	28.0026	6.31601	3.99015	1.01798	0.809682	6.67189	0.163235	3.08094	4.19492	0.121813	0	4.0305	2.99828	0.166364	0	23.1299	0.078043	6.84506	7.62606	32.4094	26.8693	0.763485	0.125508	21.0126	0.422316	8.39371	0.052079	0.356872	18.6388	10.3051	0.522501	0.275896	3.41122	0.631982	0.320854
5	R01553	Phvul.003G248050.1.p	Phvul.003G248050.v2.1	Chr03	48539059	48541466	Forward	3.44048	12.5975	6.9323	7.05278	34.0803	29.8882	0.714409	0.634873	2.20567	1.57057	1.68292	2.0521	4.03627	2.26492	6.64216	5.02611	3.1009	0.862583	22.0648	10.2062	3.48267	2.94028	83.1217	2.74903	4.35696	14.4695	36.5752	38.3306	4.78055	0.306537	0.773685	1.51463	11.8379	0.916275	1.12235	16.0083	14.2562	2.59584	1.32037	1.15945	1.36504	1.27082
5	R01553	Phvul.003G248050.2.p	Phvul.003G248050.v2.1	Chr03	48539059	48541466	Forward	0	0	0	0	0	0	0	0	0	0	0	0	0	0	0	0	0	0	0	0	0	0	0	0	0	0	0	0	0	0	0	0	0	0	0	0	0	0	0	0	0	0
5	R01553	Phvul.003G248075.1.p	Phvul.003G248075.v2.1	Chr03	48545538	48547254	Forward	33.9479	78.2048	73.2916	72.5064	214.425	196.62	17.3083	16.0657	122.527	88.2973	32.2634	29.2209	47.2736	61.2308	101.114	96.9653	21.4889	23.0416	604.093	399.685	25.5698	24.499	262.766	9.52921	62.0662	120.754	131.245	149.526	157.318	39.1836	298.234	25.4324	90.673	26.4451	38.4561	283.452	298.429	36.9974	43.0055	30.726	23.4393	20.2866
5	R01553	Phvul.003G248200.1.p	Phvul.003G248200.v2.1	Chr03	48561200	48564505	Forward	0	0	0	0	1.11188	0	0	0	0	0	0	0	0	0.133753	0	0	1.02712	2.10482	0.510486	2.64369	0.103029	0.090306	2.75078	1.32225	0	0	0	0	1.30695	1.70148	0	0.092924	0	2.76638	0.822639	1.36051	2.84517	5.69041	4.9135	0.075337	2.73008	3.80505
5	R01553	Phvul.003G248300.1.p	Phvul.003G248300.v2.1	Chr03	48567955	48569848	Forward	0	0	0	0	0	0	0	0	0	0	0.173208	0	0	0.699688	0	0	2.57401	0.183203	0	0	0.301392	0.201736	0	1.5549	0	0	0	0	0	0.334444	0	0.245297	0	0.671003	0.317633	0	0	0.400508	1.86909	0	0.268089	0.400697
[truncated: 97 more columns]

[truncated: 1 more sheets: SupplTable11_HCNPlunatus]
